# Supplementary material for: Lewis acid-catalyzed diastereoselective carbofunctionalization of bicyclobutanes employing naphthols
Source: PubMed Central journal article supplement — Chem Sci. 2023 May 23;14(24):6585–91. doi: 10.1039/d3sc01373a (PMC10284142; doi:10.1039/d3sc01373a), 2023-05-23

# **Lewis acid-catalyzed diastereoselective carbofunctionalization of bicyclobutanes employing naphthols**

**Avishek Guin, Subrata Bhattacharjee, Mahesh Singh Harariya, and Akkattu T. Biju\***

*Department of Organic Chemistry, Indian Institute of Science, Bangalore-  
560012, India*

Email: [atbiju@iisc.ac.in](mailto:atbiju@iisc.ac.in)

## **Supporting Information**

|                                                                                                                  |     |
|------------------------------------------------------------------------------------------------------------------|-----|
| 1. General Information                                                                                           | S02 |
| 2. General Procedure for the Optimization of the Reaction Conditions                                             | S03 |
| 3. General Procedure for the Lewis Acid Catalyzed Diastereoselective<br>Carbofunctionalization of Bicyclobutanes | S03 |
| 4. General Procedure for the Reaction of Unsubstituted Ketone BCBs                                               | S04 |
| 5. Mechanistic Studies                                                                                           | S05 |
| 6. X-ray Data of <b>3k</b>                                                                                       | S11 |
| 7. Variable Temperature Experiment                                                                               | S12 |
| 8. DFT Studies                                                                                                   | S16 |
| 9. Synthesis and Characterization of Carbofunctionalized Cyclobutanes                                            | S41 |
| 10. Product Functionalization                                                                                    | S56 |
| 11. <sup>1</sup> H and <sup>13</sup> C NMR Spectra of Products                                                   | S63 |

## 1. General Information

Unless otherwise specified, all reactions were carried out under an atmosphere of nitrogen in oven-dried reaction vessels with Teflon screw caps. 25 °C Corresponds to the room temperature (rt) of the lab when the experiments were carried out. CH<sub>2</sub>Cl<sub>2</sub> was freshly purified by distillation over CaH<sub>2</sub> under nitrogen atmosphere. Naphthols were purchased from either Alfa Aesar, TCI, BLD pharm or Sigma-Aldrich and were used as received. All BCBs were synthesized following the literature procedure.<sup>1</sup> Aryl/ heteroaryl 2-naphthols were synthesized following known literature procedure via Suzuki coupling.<sup>2</sup>

Analytical thin layer chromatography was performed on TLC Silica gel 60 F<sub>254</sub>. All the isolated new compounds were confirmed to be single spot on TLC. Visualization was accomplished with short wave UV light or KMnO<sub>4</sub> staining solutions followed by heating. Flash chromatography was performed on silica gel (230-400 mesh) by standard techniques eluting with Pet. Ether-EtOAc solvent system.

All compounds were fully characterized. <sup>1</sup>H and <sup>13</sup>C NMR spectra were recorded on Bruker Ultrashield spectrometer in CDCl<sub>3</sub> as solvent. Chemical shifts (δ) are given in ppm. The residual solvent signals were used as references and the chemical shifts converted to the TMS scale (CDCl<sub>3</sub>: δ<sub>H</sub> = 7.26 ppm, δ<sub>C</sub> = 77.16 ppm). Infrared (FT-IR) spectra were recorded on a Bruker Alfa FT-IR, ν-max in cm<sup>-1</sup>. HRMS (ESI) data were recorded on a Waters Xevo G2-XS Q-TOF instrument. Melting points were recorded on a Buchi melting point apparatus.

---

<sup>1</sup> (a) K. Dhake, K. J. Woelk, J. Becia, A. Un, S. E. Jenny and D. C. Leitch, *Angew. Chem., Int. Ed.*, 2022, **61**, e202204719; (b) R. M. Bychek, V. Hutskalova, Y. P. Bas, O. A. Zaporozhets, S. Zozulya, V. V. Levterov and P. K. Mykhailiuk, *J. Org. Chem.*, 2019, **84**, 15106; (c) X. Ma, D. L. Sloman, Y. Han and D. J. Bennett, *Org. Lett.*, 2019, **21**, 7199.

<sup>2</sup> S. Zhu, Y.-H. Chen, Y.-B. Wang, P. Yu, S.-Y. Li, S.-H. Xiang, J.-Q. Wang, J. Xiao and B. Tan, *Nat. Commun.*, 2019, **10**, 4268.

## 2. General Procedure for the Optimization of the Reaction Conditions

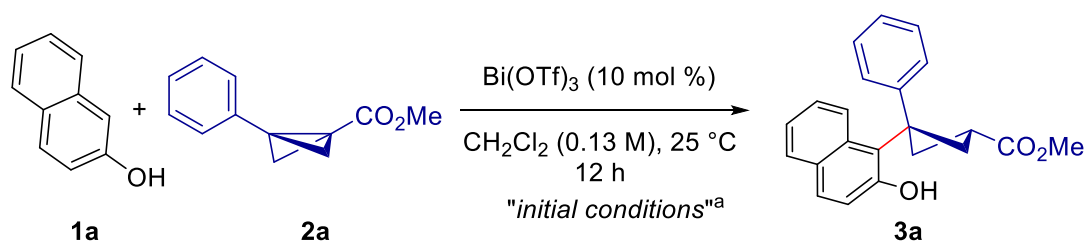

To an oven-dried screw-capped test tube equipped with a magnetic stir bar was added the  $\text{Bi}(\text{OTf})_3$  (0.013 g, 0.02 mmol) inside the glove box. After that, 2-naphthol **1a** (0.029 g, 0.2 mmol) and 1.0 mL  $\text{CH}_2\text{Cl}_2$  were added outside the glove box under nitrogen atmosphere. Then the mixture was stirred for 5 minutes at 25 °C. After 5 minutes, methyl 3-phenylbicyclo[1.1.0]butane-1-carboxylate **2a** (0.045 g, 0.24 mmol) and 0.5 mL  $\text{CH}_2\text{Cl}_2$  were added subsequently. Then, the reaction mixture was stirred for 12 h at 25 °C. After 12 h, the solvent was evaporated and the crude residue was pre-adsorbed on silica gel and purified by flash column chromatography (Pet. ether /EtOAc = 80/20) on silica gel to afford **3a** as a yellow solid.

**Table S1.** Optimization Studies

| entry          | variation of the initial conditions                            | yield of <b>3a</b> (%) <sup>b</sup> |
|----------------|----------------------------------------------------------------|-------------------------------------|
| 1              | none                                                           | 91                                  |
| 2              | $\text{Sc}(\text{OTf})_3$ instead of $\text{Bi}(\text{OTf})_3$ | 28                                  |
| 3              | $\text{Yb}(\text{OTf})_3$ instead of $\text{Bi}(\text{OTf})_3$ | 15                                  |
| 4              | TfOH instead of $\text{Yb}(\text{OTf})_3$                      | <5                                  |
| 5              | DCE instead of $\text{CH}_2\text{Cl}_2$                        | 78                                  |
| 6              | THF instead of $\text{CH}_2\text{Cl}_2$                        | 39                                  |
| 7 <sup>c</sup> | MeCN instead of $\text{CH}_2\text{Cl}_2$                       | 86                                  |
| 8              | 0 °C instead of 25 °C                                          | 84                                  |
| 9              | 1.5 equiv of <b>2a</b>                                         | 92                                  |
| 10             | 5 mol % $\text{Bi}(\text{OTf})_3$                              | 83                                  |
| 11             | 0.06 M $\text{CH}_2\text{Cl}_2$                                | 81                                  |

<sup>a</sup> Initial conditions: **1a** (0.20 mmol), **2a** (0.24 mmol),  $\text{Bi}(\text{OTf})_3$  (10 mol %),  $\text{CH}_2\text{Cl}_2$  (1.5 mL), 25 °C for 12 h. <sup>b</sup> Given are the yield of chromatographically purified **3a**. <sup>c</sup> 3.0:1 dr was obtained in this case and the dr value was determined from  $^1\text{H}$  NMR of the crude reaction mixture.

## 3. General Procedure for the Lewis Acid Catalyzed Diastereoselective Carbofunctionalization of Bicyclobutanes

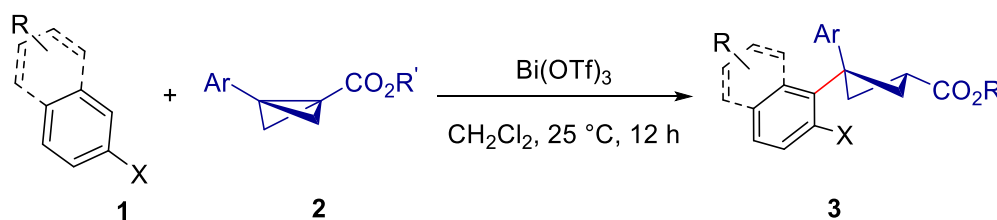

To an oven-dried screw-capped test tube equipped with a magnetic stir bar was added the Bi(OTf)<sub>3</sub> (0.013 g, 0.02 mmol) inside the glove box. After that, nucleophile **1** (0.2 mmol) and 1.0 mL CH<sub>2</sub>Cl<sub>2</sub> were added outside the glove box under nitrogen atmosphere. Then the mixture was stirred for 5 minutes at 25 °C. After 5 minutes, BCBs **2** (0.24 mmol) and 0.5 mL CH<sub>2</sub>Cl<sub>2</sub> were added subsequently. Later the reaction mixture was stirred for 12 h at 25 °C. After 12 h, the solvent was evaporated, and the crude residue was pre-adsorbed on silica gel and purified by flash column chromatography on silica gel (Pet.ether-EtOAc as eluent) to afford **3** in good to excellent yields.

**Procedure for the 2.0 mmol Scale Reaction for the synthesis of 3a**

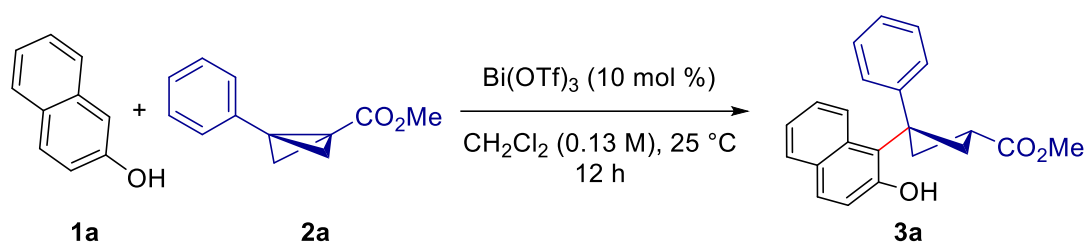

To an oven-dried screw-capped test tube equipped with a magnetic stir bar was added the Bi(OTf)<sub>3</sub> (0.131 g, 0.2 mmol) inside the glove box. After that, 2-naphthol **1a** (0.288 g, 2.0 mmol) and 10 mL CH<sub>2</sub>Cl<sub>2</sub> were added outside the glove box under nitrogen atmosphere. Then the mixture was stirred for 5 minutes at 25 °C. After 5 minutes, methyl 3-phenylbicyclo[1.1.0]butane-1-carboxylate **2a** (0.452 g, 2.4 mmol) and 5 mL CH<sub>2</sub>Cl<sub>2</sub> were added subsequently. Then, the reaction mixture was stirred for 12 h at 25 °C. After 12 h, the solvent was evaporated and the crude residue pre-adsorbed on silica gel and purified by flash column chromatography (Pet. ether /EtOAc = 80/20) on silica gel to afford **3a** as a yellow solid (0.592 g, 89% yield).

**4. General Procedure for the Reaction of Unsubstituted Ketone BCBs**

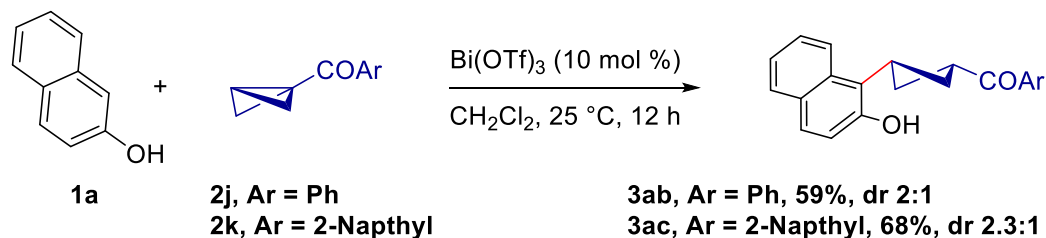

To an oven-dried screw-capped test tube equipped with a magnetic stir bar was added the Bi(OTf)<sub>3</sub> (0.013 g, 0.02 mmol) inside the glove box. After that, 2-naphthol **1a** (0.029 g, 2.0 mmol) and 1.0 mL CH<sub>2</sub>Cl<sub>2</sub> were added outside the glove box under nitrogen atmosphere. Then

the mixture was stirred for 5 minutes. After 5 minutes, keto BCBs **2j** or **2k** (0.24 mmol) and 0.5 mL CH<sub>2</sub>Cl<sub>2</sub> were added subsequently. Later the reaction mixture was stirred for 12 h. After 12 h, the reaction was stopped, the solvent was evaporated and the crude residue pre-adsorbed on silica gel and purified by flash column chromatography on silica gel (Pet.ether-EtOAc as eluent) to afford **3ab** or **3ac** in moderate to good yields.

## 5. Mechanistic Studies

### *Reaction in the absence of Bi(OTf)<sub>3</sub>*

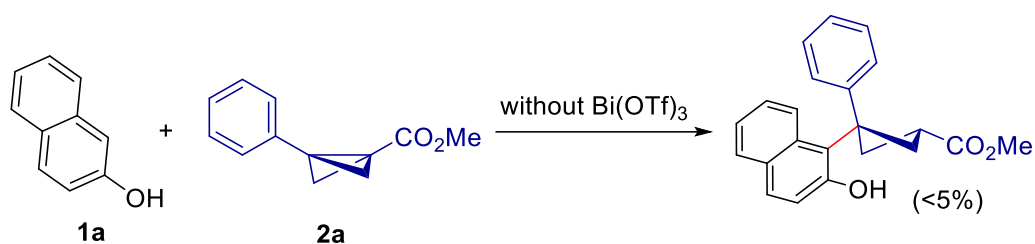

To an oven-dried screw-capped test tube equipped with a magnetic stir bar was added 2-naphthol **1a** (0.029 g, 2.0 mmol) and 1.0 mL CH<sub>2</sub>Cl<sub>2</sub> under nitrogen atmosphere. Then the mixture was stirred for 5 minutes at 25 °C. After 5 minutes, methyl 3-phenylbicyclo[1.1.0]butane-1-carboxylate **2a** (0.045 g, 0.24 mmol) and 0.5 mL CH<sub>2</sub>Cl<sub>2</sub> were added subsequently. Later the reaction mixture was stirred for 12 h at 25 °C. After 12 h, the reaction mixture was passed through a pad of silica gel and then eluted with EtOAc (3x10 mL), and the solvent was evaporated to get the crude products, which was analyzed using <sup>1</sup>H NMR spectroscopy.

*This study indicates that the 2-naphthol triggered diastereoselective BCB ring-opening is a Lewis acid catalyzed process.*

### *Reaction using 2-methoxy naphthalene*

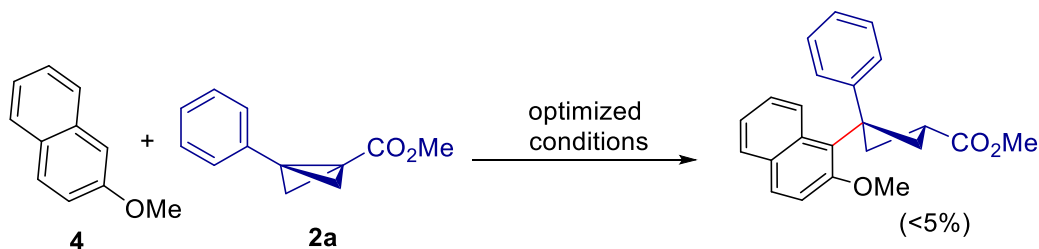

To an oven-dried screw-capped test tube equipped with a magnetic stir bar was added the Bi(OTf)<sub>3</sub> (0.013 g, 0.02 mmol) inside the glove box. After that, 2-methoxynaphthalene **4** (0.032 g, 0.2 mmol) and 1.0 mL CH<sub>2</sub>Cl<sub>2</sub> were added outside the glove box under nitrogen atmosphere. Then the mixture was stirred for 5 minutes at 25 °C. After 5 minutes, methyl 3-

phenylbicyclo[1.1.0]butane-1-carboxylate **2a** (0.045 g, 0.24 mmol) and 0.5 mL CH<sub>2</sub>Cl<sub>2</sub> were added subsequently. Then, the reaction mixture was stirred for 12 h at 25 °C. After 12 h, the reaction mixture was passed through a pad of silica gel and then eluted with EtOAc (3x10 mL), and the solvent was evaporated to get the crude products, which was analyzed using <sup>1</sup>H NMR spectroscopy.

*This study indicates the crucial role of free -OH group in the 2-naphthol triggered, Lewis acid catalyzed diastereoselective ring-opening of BCB. In the absence of a free -OH group, the carbofunctionalization process was deemed unfavorable due to the lack of proper coordination between 2-naphthol and Bi(OTf)<sub>3</sub>. (Scheme 4 of the manuscript, eq 4).*

### Reaction of BCB with Bi(OTf)<sub>3</sub>

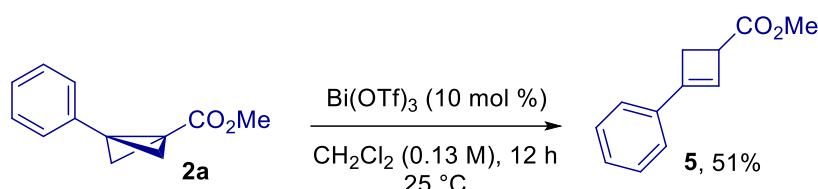

To an oven-dried screw-capped test tube equipped with a magnetic stir bar was added the Bi(OTf)<sub>3</sub> (0.013 g, 0.02 mmol) inside the glove box. After that, methyl 3-phenylbicyclo[1.1.0]butane-1-carboxylate **2a** (0.038 g, 0.2 mmol) and 1.5 mL CH<sub>2</sub>Cl<sub>2</sub> were added subsequently. Then, the reaction mixture was stirred for 12 h at 25 °C. After 12 h, the reaction was stopped, the solvent was evaporated and the crude residue pre-adsorbed on silica gel and purified by flash column chromatography (Pet. ether /EtOAc = 97/03) on silica gel to afford **5** as a colorless oil (0.019 g, 51% yield).

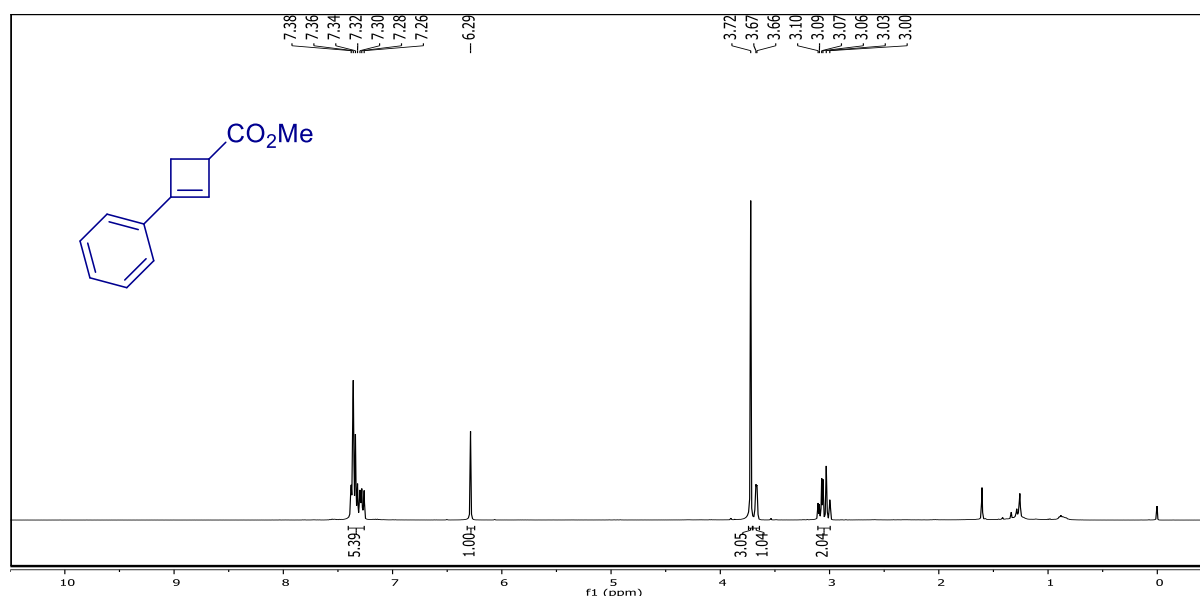

*This study indicates that in the absence of 2-naphthol, BCB can directly coordinate with Lewis acid, which facilitate the decomposition of BCB. Most probably, 2-naphthol reduces the Lewis acidity of Bi(OTf)<sub>3</sub> and therefore no cyclobutene product was obtained in our optimized reaction conditions. But the question arises whether the carbofunctionalized product formation is possible via the intermediacy of cyclobutene. (Scheme 4 of the manuscript, eq 5).*

### **Reaction of cyclobutene **5** with 2-naphthol**

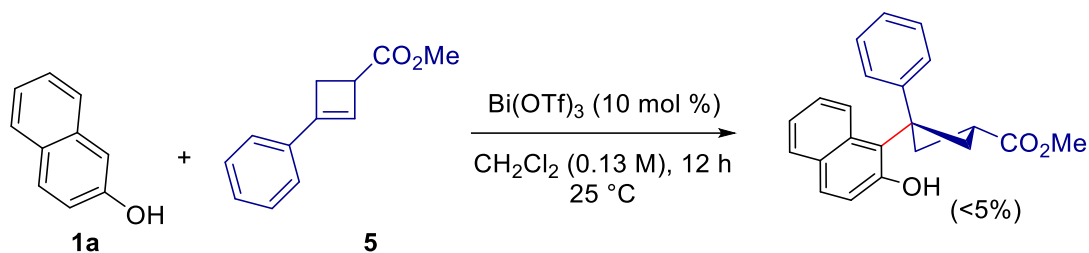

To an oven-dried screw-capped test tube equipped with a magnetic stir bar was added the Bi(OTf)<sub>3</sub> (0.013 g, 0.02 mmol) inside the glove box. After that, 2-naphthol **1a** (0.029 g, 2.0 mmol) and 1.0 mL CH<sub>2</sub>Cl<sub>2</sub> were added outside the glove box under nitrogen atmosphere. Then the mixture was stirred for 5 minutes at 25 °C. After 5 minutes, methyl 3-phenylcyclobut-2-ene-1-carboxylate **2a** (0.038 g, 0.2 mmol) and 0.5 mL CH<sub>2</sub>Cl<sub>2</sub> were added subsequently. Later the reaction mixture was stirred for 12 h at 25 °C. After 12 h, the reaction mixture was passed through a pad of silica gel and then eluted with EtOAc (3x10 mL), and the solvent was evaporated to get the crude products, which was analyzed using <sup>1</sup>H NMR spectroscopy.

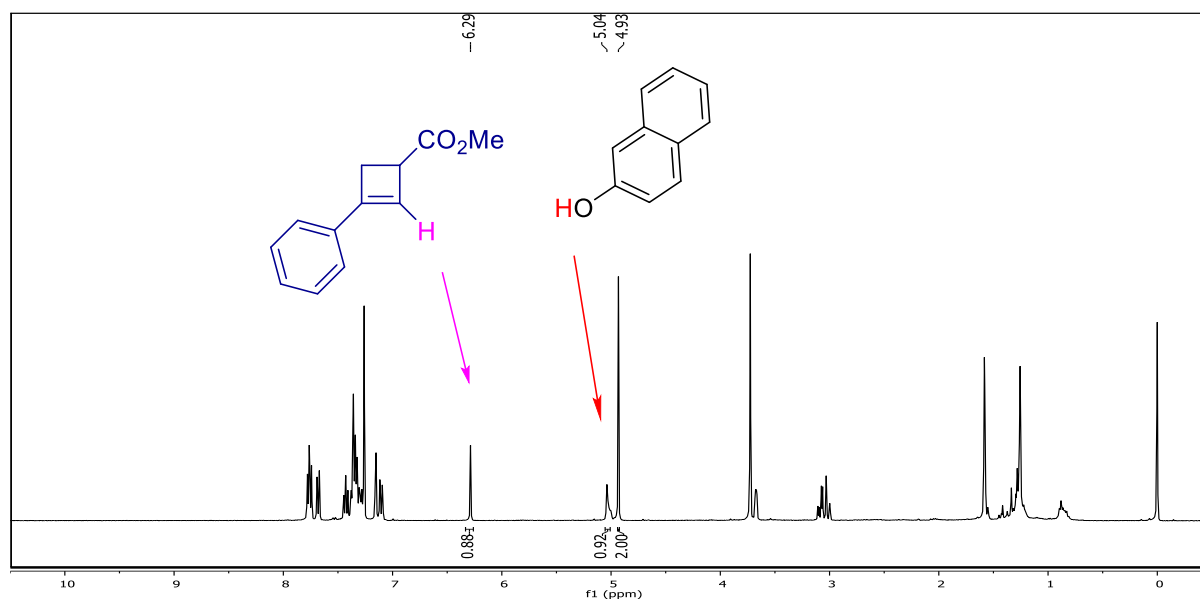

*The findings of this study have ruled out the possibility of cyclobutene formation occurring during the present carbofunctionalization reaction. (Scheme 4 of the manuscript, eq 6).*

### Reaction with 1-bromonaphthalen-2-ol

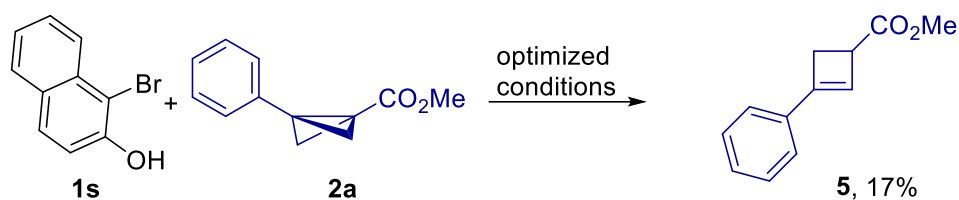

To an oven-dried screw-capped test tube equipped with a magnetic stir bar was added the  $\text{Bi}(\text{OTf})_3$  (0.013 g, 0.02 mmol) inside the glove box. After that, 1-bromonaphthalen-2-ol **1s** (0.045 g, 0.2 mmol) and 1.0 mL  $\text{CH}_2\text{Cl}_2$  were added outside the glove box under nitrogen atmosphere. Then the mixture was stirred for 5 minutes at 25 °C. After 5 minutes, methyl 3-phenylbicyclo[1.1.0]butane-1-carboxylate **2a** (0.045 g, 0.24 mmol) and 0.5 mL  $\text{CH}_2\text{Cl}_2$  were added subsequently. Then, the reaction mixture was stirred for 12 h at 25 °C. After 12 h, the reaction mixture was passed through a pad of silica gel and then eluted with EtOAc (3x10 mL), and the solvent was evaporated to get the crude products, which was analyzed using  $^1\text{H}$  NMR spectroscopy. In this case, the cyclobutene **5** was formed in 17% (crude  $^1\text{H}$  NMR analysis).

*This indicates that the present reaction does not work with 2-naphthols with a substituent at the 1-position. (Scheme 4 of the manuscript, eq 7).*

### Reaction with sulfonyl BCB

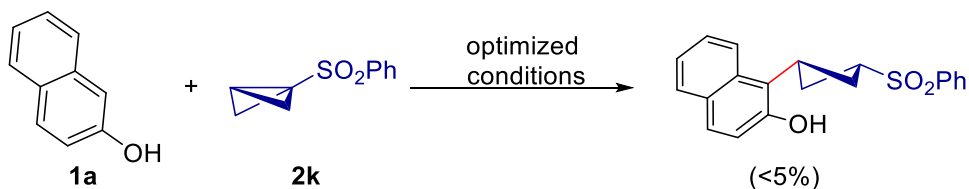

To an oven-dried screw-capped test tube equipped with a magnetic stir bar was added the  $\text{Bi}(\text{OTf})_3$  (0.013 g, 0.02 mmol) inside the glove box. After that, 2-naphthol **1a** (0.029 g, 0.2 mmol) and 1.0 mL  $\text{CH}_2\text{Cl}_2$  were added outside the glove box under nitrogen atmosphere. Then the mixture was stirred for 5 minutes at 25 °C. After 5 minutes, 1-(phenylsulfonyl)bicyclo[1.1.0]butane **2k** (0.047 g, 0.24 mmol) and 0.5 mL  $\text{CH}_2\text{Cl}_2$  were added subsequently. Then, the reaction mixture was stirred for 12 h at 25 °C. After 12 h, the reaction mixture was passed through a pad of silica gel and then eluted with EtOAc (3x10 mL), and the solvent was evaporated to get the crude products, which was analyzed using  $^1\text{H}$  NMR spectroscopy. In this case, no desired product formation was observed.

*This study sheds light on the importance of ester moiety of BCB for effective Lewis acid binding in this diastereoselective ring-opening reaction (Scheme 4 of the manuscript, eq 8).*

### Dependence of the reaction on the mode of addition

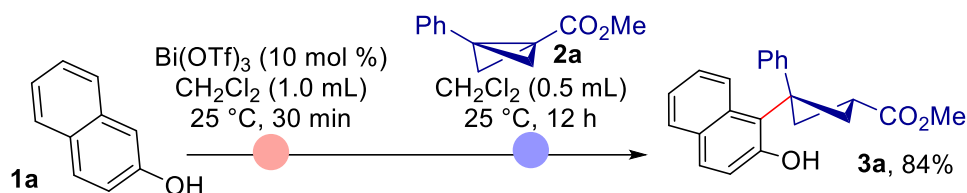

To an oven-dried screw-capped test tube equipped with a magnetic stir bar was added the  $\text{Bi}(\text{OTf})_3$  (0.013 g, 0.02 mmol) inside the glove box. After that, 2-naphthol **1a** (0.029 g, 0.2 mmol) and 1.0 mL  $\text{CH}_2\text{Cl}_2$  were added outside the glove box under nitrogen atmosphere. Then the mixture was stirred for 30 minutes at 25 °C. After 30 minutes, methyl 3-phenylbicyclo[1.1.0]butane-1-carboxylate **2a** (0.045 g, 0.24 mmol) and 0.5 mL  $\text{CH}_2\text{Cl}_2$  were added subsequently. Then, the reaction mixture was stirred for 12 h at 25 °C. After 12 h, the reaction was stopped, the solvent was evaporated, and the crude mixture was passed through a pad of silica gel and eluted with EtOAc (3x10 mL). The reaction mixture was concentrated under reduced pressure and then the yield of **3a** was determined by the  $^1\text{H}$  NMR analysis of the crude reaction products using  $\text{CH}_2\text{Br}_2$  as the internal standard.

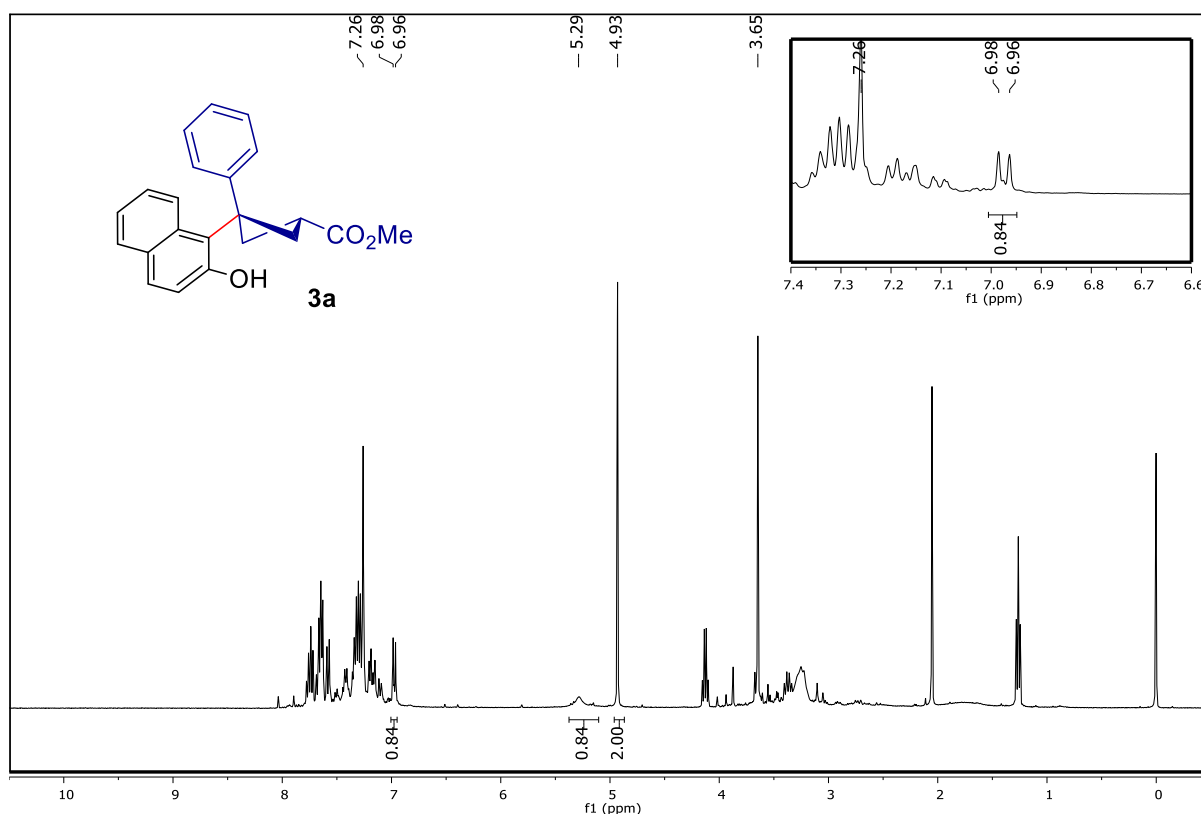

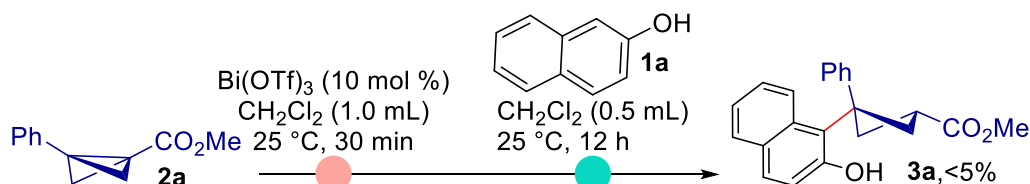

To an oven-dried screw-capped test tube equipped with a magnetic stir bar was added the  $\text{Bi(OTf)}_3$  (0.013 g, 0.02 mmol) inside the glove box. After that, methyl 3-phenylbicyclo[1.1.0]butane-1-carboxylate **2a** (0.045 g, 0.24 mmol) and 1.0 mL  $\text{CH}_2\text{Cl}_2$  were added outside the glove box under nitrogen atmosphere. Then the mixture was stirred for 30 minutes at 25 °C. After 30 minutes, 2-naphthol **1a** (0.029 g, 0.2 mmol) and 0.5 mL  $\text{CH}_2\text{Cl}_2$  were added subsequently. Then, the reaction mixture was stirred for 12 h at 25 °C. After 12 h, the reaction was stopped, the solvent was evaporated, and the crude mixture was passed through a pad of silica gel and eluted with EtOAc (3x10 mL). The reaction mixture was concentrated under reduced pressure and then the yield of **3a** was determined by the  $^1\text{H}$  NMR analysis of the crude reaction products using  $\text{CH}_2\text{Br}_2$  as the internal standard ( $^1\text{H}$  NMR revealed that naphthol was unreacted under this conditions).

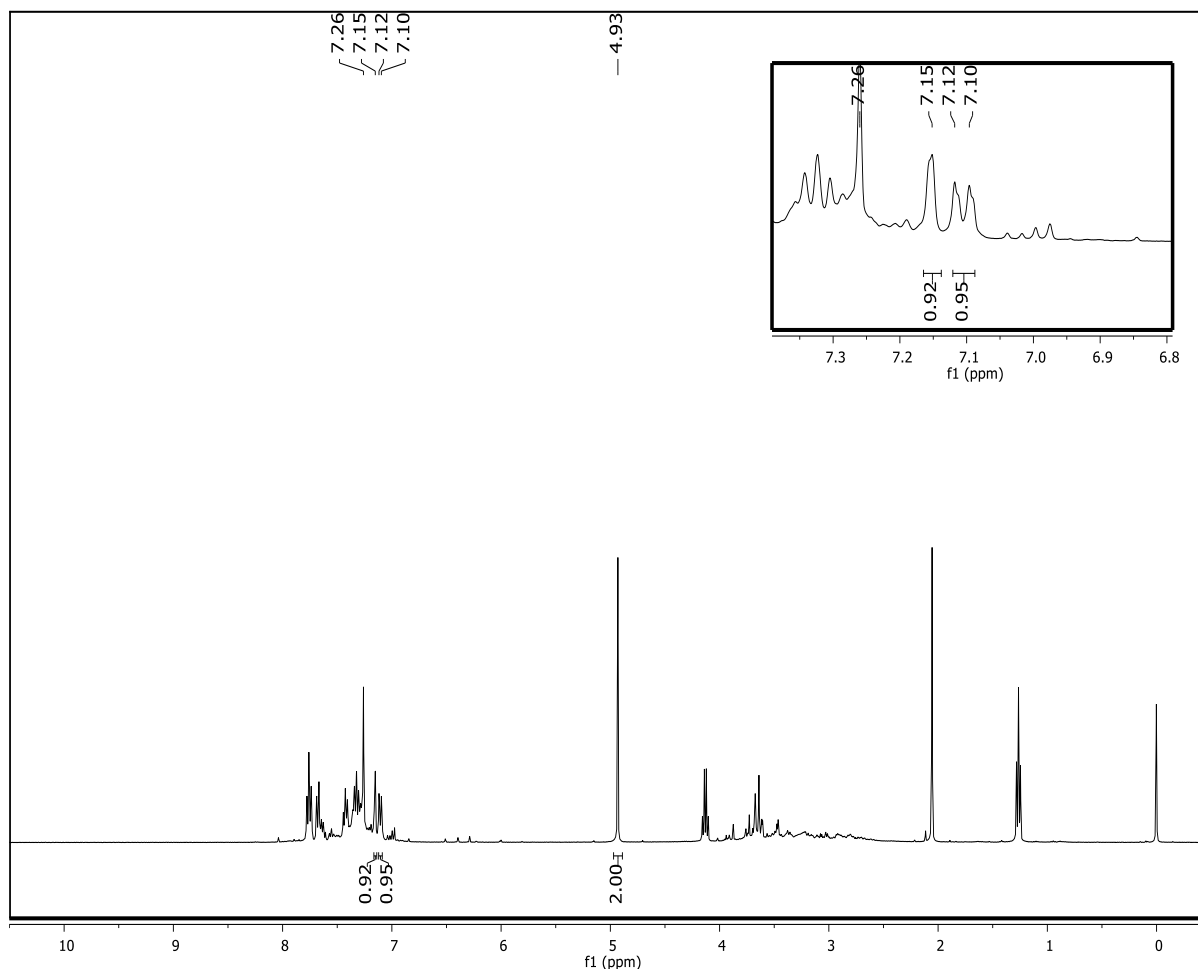

*These two reactions support our hypothesis about the intermediacy of bicoordinated Bi-complex for the present transformation. The pre-complexation of the Lewis acid with 2-naphthol (presumably) lowers the acidity of the Lewis acid thereby effectively halting the BCB decomposition; the soft coordination with BCB ester with the precomplexed Bi(OTf)<sub>3</sub> (with 2-naphthol) forms the bicoordinated Bi-complex, which enables the diastereoselective ring-opening of activated BCB. Reversing the mode of addition leads to decomposition of the BCB, as the acidity of Lewis acid could not be reduced by the 2-naphthol coordination (Scheme 5 of the manuscript, eq 9 and 10).*

## 6. X-ray Data of **3k**

Single crystal of **3k** (recrystallized from EtOAc/*n*-hexane at 25 °C) was mounted and the diffraction data was collected at 173 K on a Bruker APEX-II CCD diffractometer using SMART/SAINT software. Intensity data were collected using MoK $\alpha$  radiation ( $\lambda=0.71073$  Å). The single crystal was affixed to a Hampton Research cryoloop using Paratone-N oil. Data collection and reduction was performed using Bruker APEX2 and Bruker SAINT, respectively. The structure was solved by direct methods using the SHELX-97 and refined by full-matrix leastsquares on F<sup>2</sup>. Empirical absorption corrections were applied with SADABS. All Nonhydrogen atoms were refined anisotropically and hydrogen atoms were included in geometric positions. Structure was drawn using Olex-2 and Mercury-3. CCDC 2233256 (**3k**) contains the supplementary crystallographic data for this paper. These data can be obtained free of charge from Data Centre via [www.ccdc.cam.ac.uk/data\\_request/cif](http://www.ccdc.cam.ac.uk/data_request/cif). The crystallographic refinement parameters are given below:

**Table S2** Crystal data and structure refinement for **3k**

|                                   |                                                                                                                              |
|-----------------------------------|------------------------------------------------------------------------------------------------------------------------------|
| Compound                          | <b>3k</b>                                                                                                                    |
| Empirical formula                 | C <sub>22</sub> H <sub>19</sub> O <sub>3</sub> Br                                                                            |
| Formula weight                    | 411.28                                                                                                                       |
| Temperature                       | 173(2) K                                                                                                                     |
| Wavelength                        | 0.71073 Å                                                                                                                    |
| Crystal system                    | Monoclinic                                                                                                                   |
| Space group                       | Pn                                                                                                                           |
| Unit cell dimensions              | a = 10.6120(7) Å, b = 13.2639(8) Å, c = 13.3533(8) Å, $\alpha = 90^\circ$ , $\beta = 104.195(2)^\circ$ , $\gamma = 90^\circ$ |
| Volume                            | 1822.2(2) Å <sup>3</sup>                                                                                                     |
| Z                                 | 4                                                                                                                            |
| Density (calculated)              | 1.499 g/cm <sup>3</sup>                                                                                                      |
| Absorption coefficient            | 2.275 mm <sup>-1</sup>                                                                                                       |
| F(000)                            | 840.0                                                                                                                        |
| Theta range for data collection   | 6.414 to 58.36°                                                                                                              |
| Index ranges                      | -14 ≤ h ≤ 14, -18 ≤ k ≤ 18, -18 ≤ l ≤ 17                                                                                     |
| Reflections collected             | 54631                                                                                                                        |
| Independent reflections           | 9374 [R <sub>int</sub> = 0.0440, R <sub>sigma</sub> = 0.0476]                                                                |
| Data / restraints / parameters    | 9374/2/477                                                                                                                   |
| Goodness-of-fit on F <sup>2</sup> | 1.019                                                                                                                        |
| Final R indices [I > 2sigma(I)]   | R <sub>I</sub> = 0.0318, wR <sub>2</sub> = 0.0663                                                                            |
| R indices (all data)              | R <sub>I</sub> = 0.0410, wR <sub>2</sub> = 0.0688                                                                            |

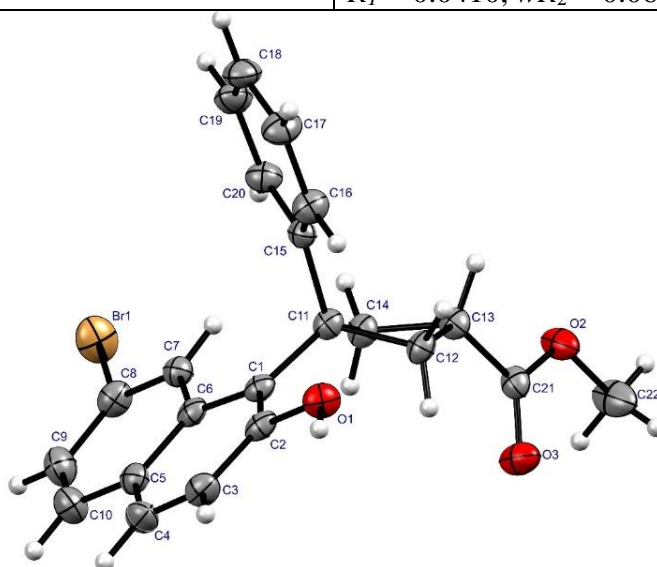

**Figure S1.** Crystal structure of **3k** (Thermal ellipsoids are shown with 50% probability)

## 7. Variable Temperature Experiment

For all the synthesized 2-naphthol substituted cyclobutane derivatives the peaks for 5 protons from the cyclobutane rings appear very broad in <sup>1</sup>H NMR spectrum (3.43-3.29 for **3a**), while the signals for C3 and C4 in the <sup>13</sup>C spectra are of low intensity (40.6 for **3a**) (it is worth mentioning that no problems were observed in the <sup>1</sup>H and <sup>13</sup>C spectra for the compounds **3w-3y**). The peak broadening in <sup>1</sup>H NMR and low intensity in <sup>13</sup>C NMR may be attributed due to the bond rotation of naphthyl substituents in the cyclobutane ring. To examine this possibility, we conducted variable temperature experiments, recording the <sup>1</sup>H NMR at 25 °C, -10 °C, -20

°C, and -35 °C. The peak broadening in the  $^1\text{H}$  NMR is significantly reduced at -35 °C. Moreover, the  $^{13}\text{C}$  spectrum at -35 °C reveals two different singlets for C3 and C4, which may be the result of restricted bond rotation in this molecule. We also checked the  $^1\text{H}$  and  $^{13}\text{C}$  NMR in 800 MHz NMR machine but the peak broadening and low intensity was similar to that of 400 MHz NMR machine.

#### $^1\text{H}$ NMR at 25 °C (500 MHz, $\text{CDCl}_3$ )

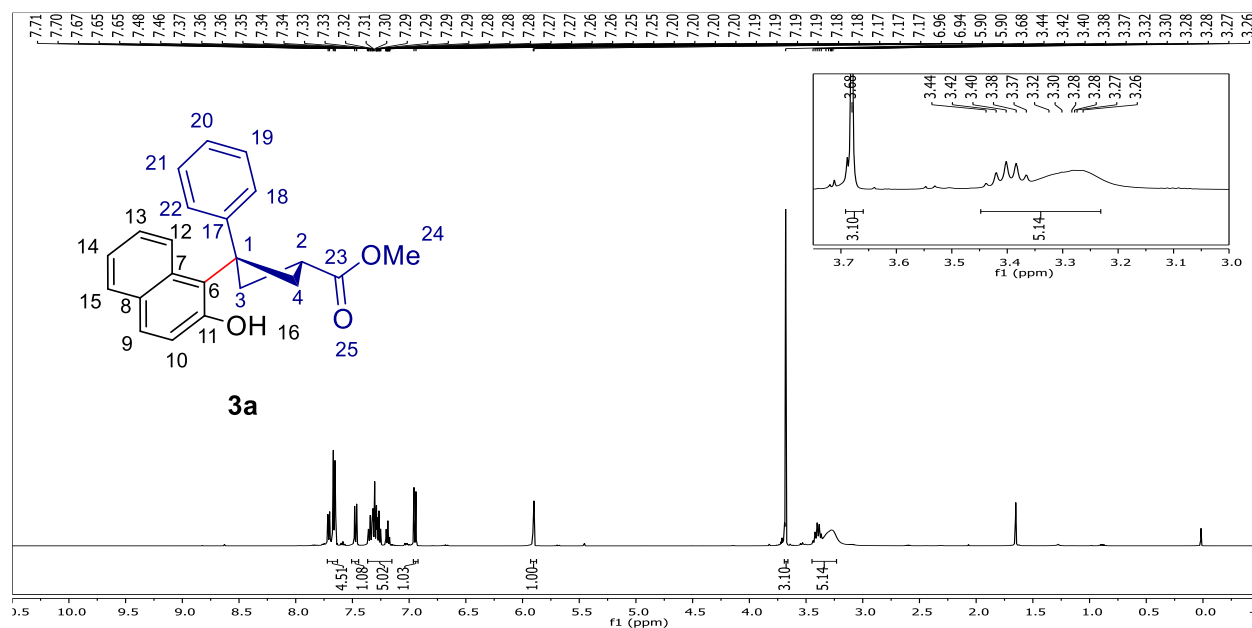

#### $^1\text{H}$ NMR at -10 °C (500 MHz, $\text{CDCl}_3$ )

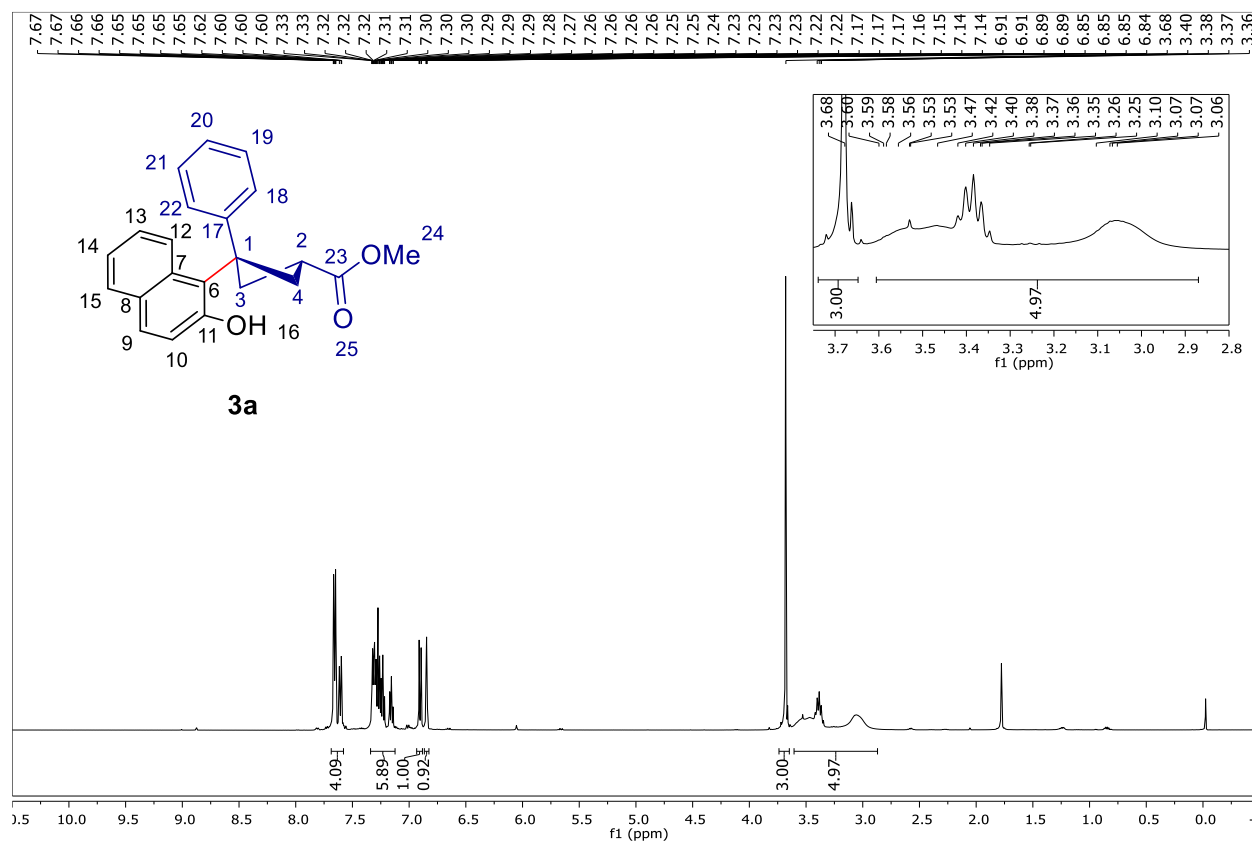

**$^1\text{H}$  NMR at -20 °C (500 MHz,  $\text{CDCl}_3$ )**

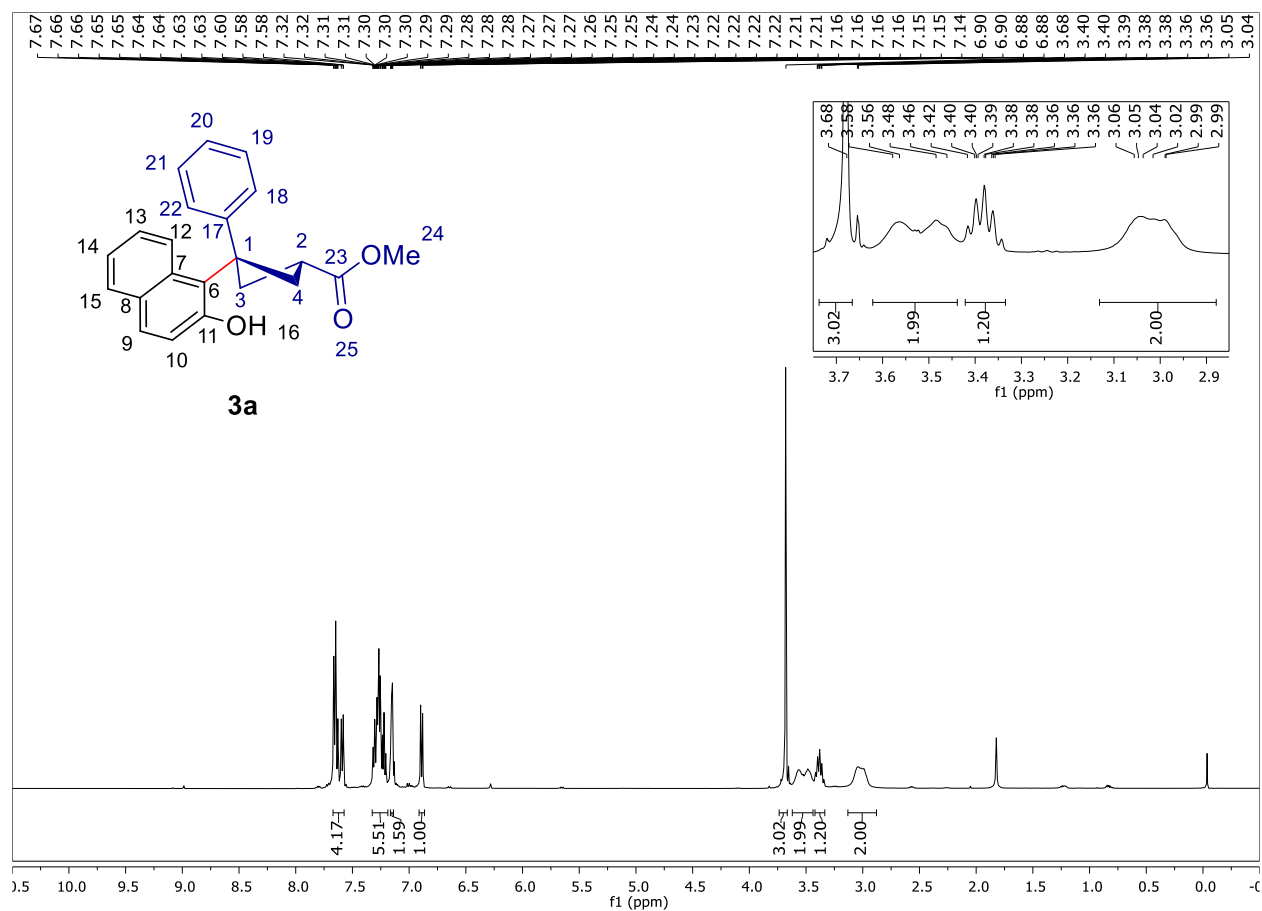

**$^1\text{H}$  NMR at -35 °C (500 MHz,  $\text{CDCl}_3$ )**

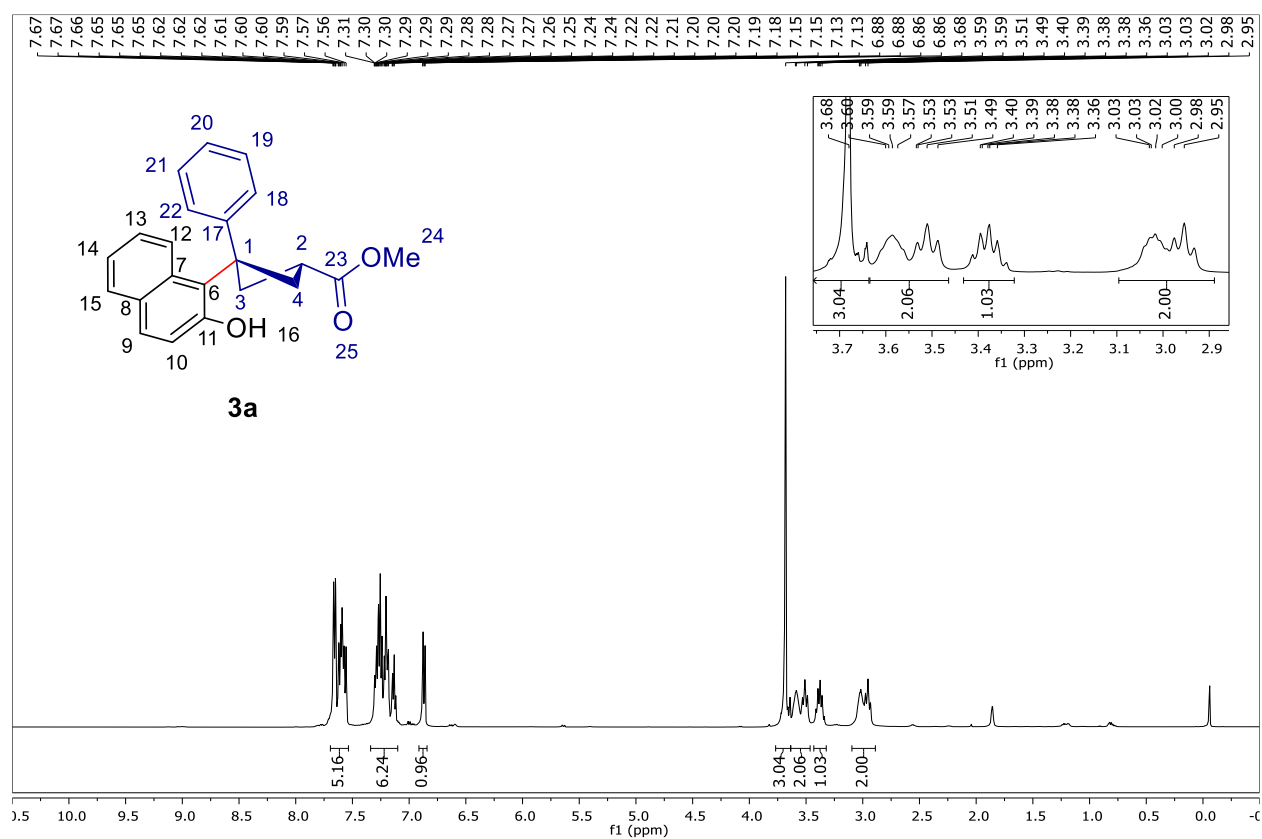

**$^{13}\text{C}$  NMR at  $-35\text{ }^{\circ}\text{C}$  (125 MHz,  $\text{CDCl}_3$ )**

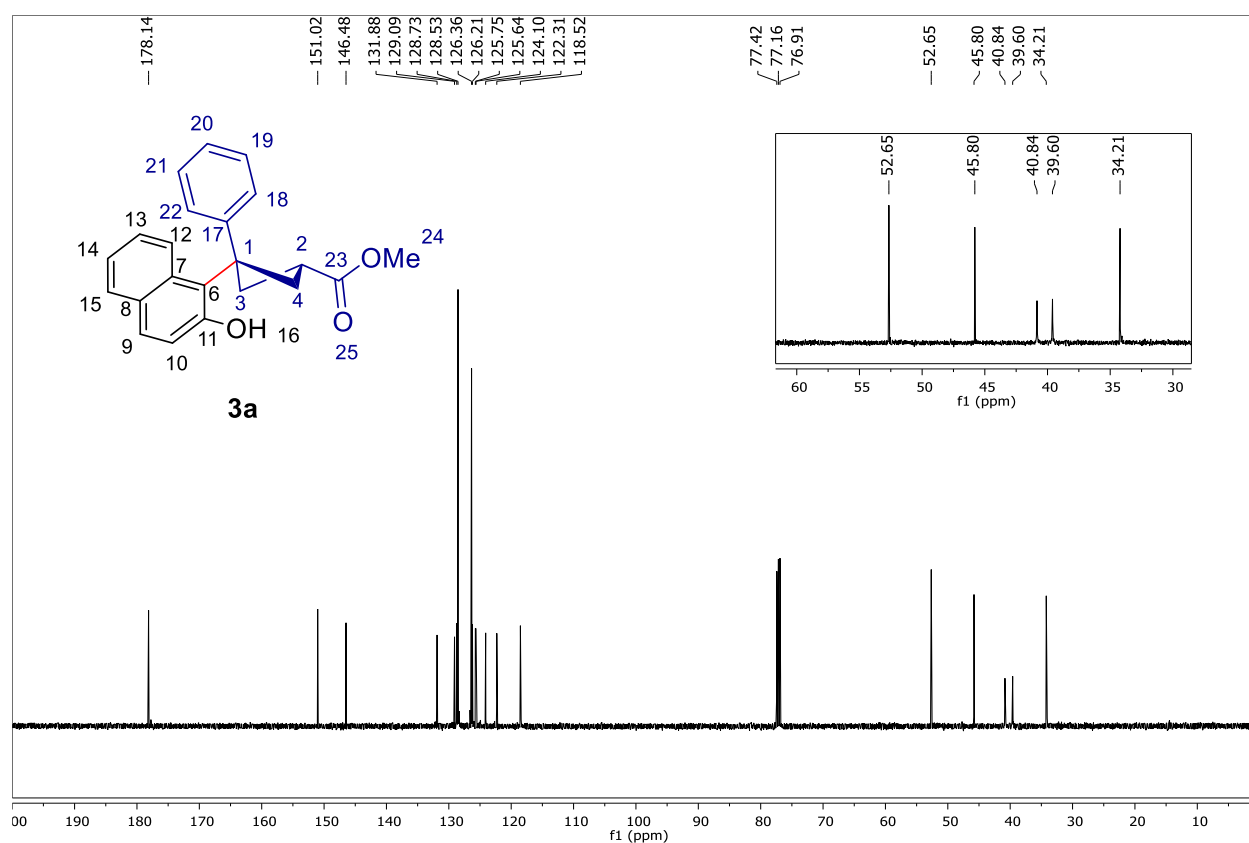

**$^1\text{H}$  NMR at  $25\text{ }^{\circ}\text{C}$  (800 MHz,  $\text{CDCl}_3$ )**

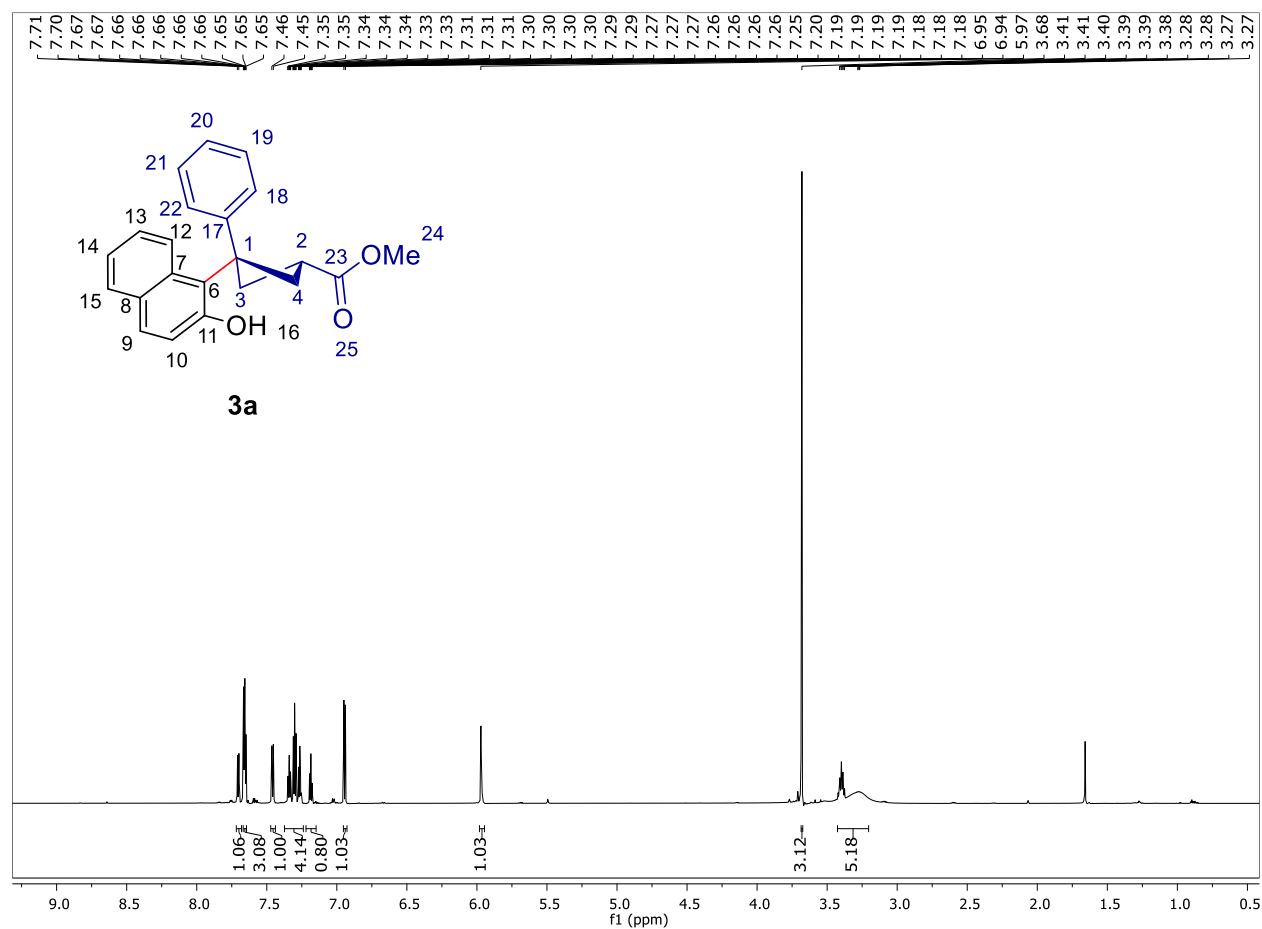

### <sup>13</sup>C NMR at 25 °C (200 MHz, CDCl<sub>3</sub>)

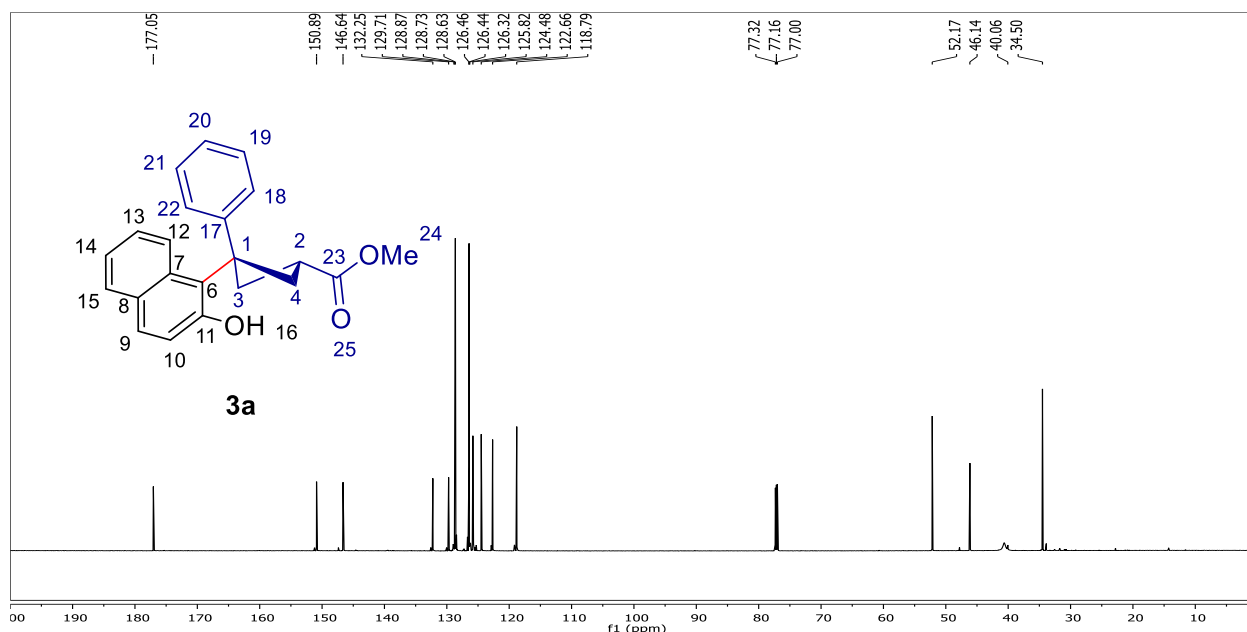

## 8. DFT Studies

All DFT calculations were carried out using the Gaussian 16<sup>3</sup> software. All the stationary points along the reaction pathways have been optimized with the hybrid functional B3LYP-D3 and standard split valence Pople's type basis set 6-31G(d,p) except for bismuth(Bi).<sup>4</sup> To describe this heavy metal, LANL2DZ basis set was used with an effective core potential (ECP).<sup>5</sup> The vibrational frequencies were also computed at the same level of theory to identify the stationary points as minima or first order saddle points. Single point energies of B3LYP-D3 optimized structures were calculated using the B3LYP-D3(BJ) functional and triple zeta basis set; 6-311++G(d,p). SMD solvation model<sup>6</sup> was used to consider the solvent effect of dichloromethane. Thermal corrections obtained from optimized geometries were added to the electronic energies obtained after single point calculations. The

<sup>3</sup> M. J. Frisch, G. W. Trucks, H. B. Schlegel, G. E. Scuseria, M. A. Robb, J. R. Cheeseman, G. Scalmani, V. Barone, G. A. Petersson, H. Nakatsuji, X. Li, M. Caricato, A. V. Marenich, J. Bloino, B. G. Janesko, R. Gomperts, B. Mennucci, H. P. Hratchian, J. V. Ortiz, A. F. Izmaylov, J. L. Sonnenberg, D. Williams-Young, F. Ding, F. Lipparini, F. Egidi, J. Goings, B. Peng, A. Petrone, T. Henderson, D. Ranasinghe, V. G. Zakrzewski, J. Gao, N. Rega, G. Zheng, W. Liang, M. Hada, M. Ehara, K. Toyota, R. Fukuda, J. Hasegawa, M. Ishida, T. Nakajima, Y. Honda, O. Kitao, H. Nakai, T. Vreven, K. Throssell, J. A. Montgomery, Jr., J. E. Peralta, F. Ogliaro, M. J. Bearpark, J. J. Heyd, E. N. Brothers, K. N. Kudin, V. N. Staroverov, T. A. Keith, R. Kobayashi, J. Normand, K. Raghavachari, A. P. Rendell, J. C. Burant, S. S. Iyengar, J. Tomasi, M. Cossi, J. M. Millam, M. Klene, C. Adamo, R. Cammi, J. W. Ochterski, R. L. Martin, K. Morokuma, O. Farkas, J. B. Foresman, and D. J. Fox, Gaussian, Inc., Wallingford CT, **2016**.

<sup>4</sup> (a) C. Lee, W. Yang and R. G. Parr, *Phys. Rev. B: Condens. Matter Mater. Phys.*, 1988, **37**, 785; (b) A. D. Becke, *J. Chem. Phys.*, 1993, **98**, 5648; (c) W. J. Hehre, R. Ditchfield and J. A. Pople, *J. Chem. Phys.*, 1972, **56**, 2257; (d) P. C. Hariharan and J. A. Pople, *Theor. Chim. Acta.*, 1973, **28**, 213.

<sup>5</sup> P. J. Hay and W. R. Wadt, *J. Chem. Phys.*, 1985, **82**, 299.

<sup>6</sup> A. V. Marenich, C. J. Cramer and D. G. Truhlar *J. Phys. Chem. B*, 2009, **113**, 6378.

free energies are reported at the  $\text{SMD}_{(\text{DCM})}/\text{B3LYP-D3(BJ)}/6\text{-}311++\text{G(d,p),LANL2DZ(Bi)}/\text{B3LYP-D3/6-}31\text{G(d,p),LANL2DZ(Bi)}$  level of theory.

Considering previous mechanistic studies reported in literature, we initiated our computational investigation to unravel the mechanism responsible for the formation of trisubstituted cyclobutene **3a** with notable diastereoselectivity. The desired product **3a** is obtained by reacting 2-naphthol **1a** with BCB (bicyclobutane) **2a** in the presence of  $\text{Bi}(\text{OTf})_3$ . Initially, naphthol coordinates to bismuth triflate (**X**) to produce intermediate **A**, where one of the triflate ligands abstracts a proton and departs as triflic acid. From intermediate **A**, there are three different pathways through which the reaction can proceed. In pathway I, the Bi bound naphthol acts as a nucleophile and reacts via its C1 position with the incoming BCB through **TS(A-G)** to give intermediate **G**. In Pathway II, BCB coordinates to Bi displacing the initially bound naphthol ion leading to the positively charged intermediate **K**. In Pathway III, BCB coordinates to **A** displacing a triflate ion instead of the naphthol ion to yield intermediate **B**. The positive charge formed at the carbon center C3 of the cyclobutane can be stabilized by the phenyl group attached to the same carbon. In the first two cases the barrier is high as compared to the third case where we are getting the intermediate **B** (shown in Figure S2). So, for further studies we continued this pathway. Now nucleophilic attack of naphthol to the C3 of BCB happens via **TS(B-C)** to give the intermediate **C**.

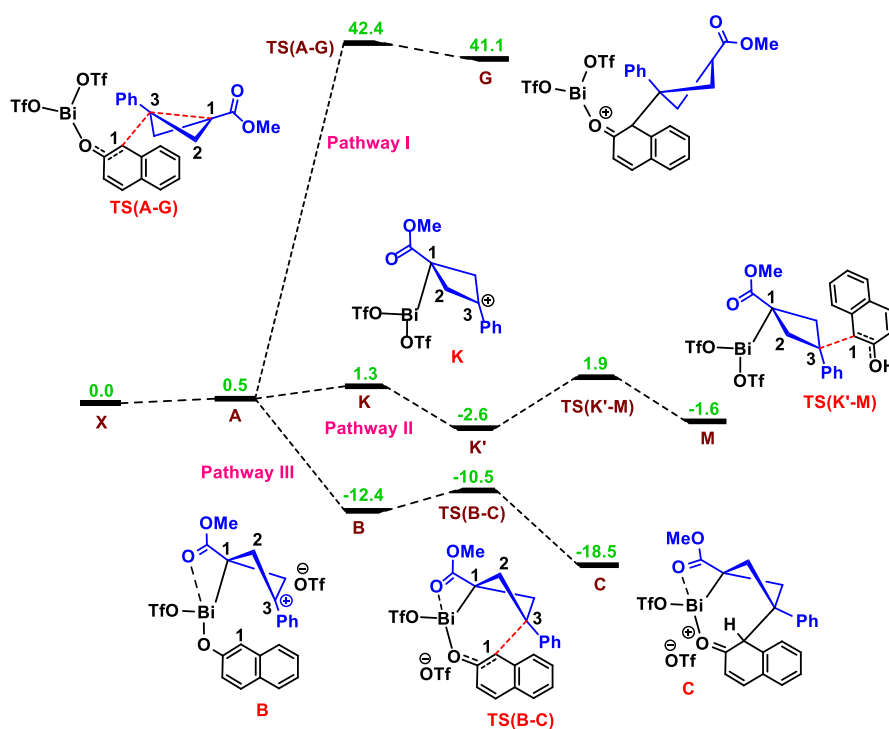

**Figure S2** Free energy profile (kcal/mol) for different possible pathways. Relative free energies ( $\Delta G$ ) (kcal/mol) are given at the  $\text{SMD}_{(\text{DCM})}/\text{B3LYP-D3(BJ)}/6\text{-}311++\text{G(d,p),LANL2DZ(Bi)}/\text{B3LYP-D3/6-}31\text{G(d,p),LANL2DZ(Bi)}$  level of theory.

The low barrier for this TS (transition state) can be explained by the high electrophilicity of BCB due to the positive charge. Subsequently, 1,3-proton transfer leads to rearomatization of naphthol via **TS(C-D)** to generate intermediate **D**. Another naphthol molecule comes and binds to Bi, resulting in the formation of enol intermediate **E**. From this intermediate hydrogen can be transferred from above face or below face of substrate giving rise to two different diastereomers (shown in Figure S4). Most likely, this proton transfer (tautomerization) is the diastereo-determining step of the reaction. Now the tautomerization via **TS(E-F)** gives the intermediate **F** where the product is weakly coordinated to Bi. Ultimately, metal dissociation results in the formation of the final product, **3a**. The presence of a highly strained four-membered ring formation during proton transfer contributes to the high energy barriers in both TSs, **TS(C-D)** and **TS(E-F)** (shown in Figure S3). This indicates the possibility of a distinct mechanism for the proton transfer step, potentially assisted by the naphthol or triflate ion present in the reaction mixture. Additional investigations are needed to further examine the proton transfer process. We also calculated the energy of both the products (diastereomers) and found that  $P_{\text{major}}$  is 1.7 kcal/mol more stable than  $P_{\text{minor}}$  which corresponds to around 17:1 diastereomeric ratio which is in good agreement with experimental value of 20:1.

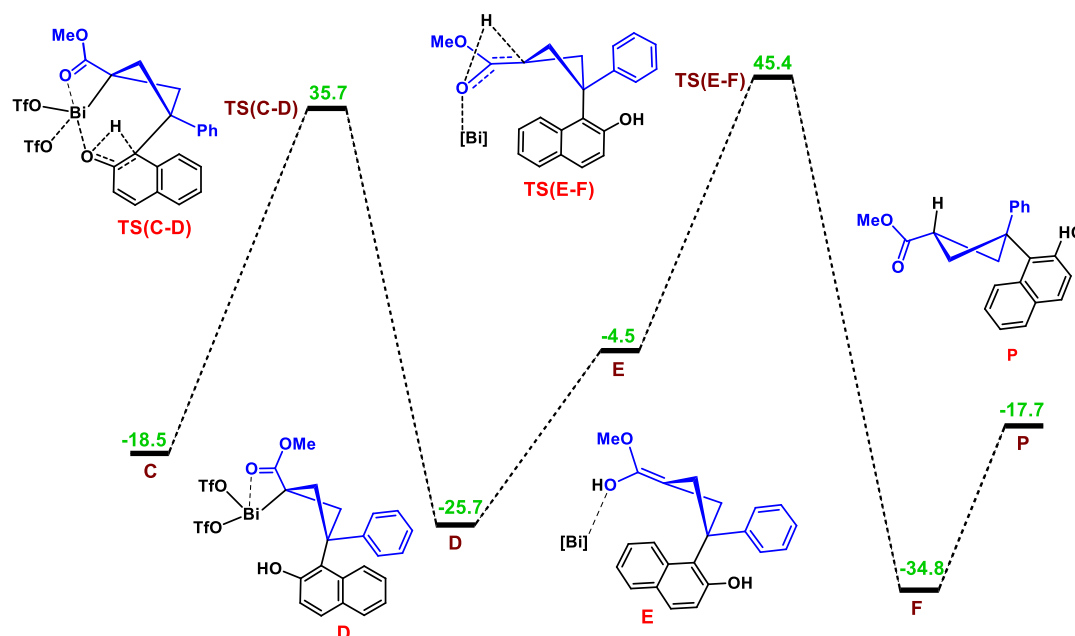

**Figure S3.** Free energy profile (kcal/mol) for the formation of the major product from intermediate **C**. Relative free energies ( $\Delta G$ ) (kcal/mol) are given at the SMD<sub>(DCM)</sub>/B3LYP-D3BJ/6-311++G(d,p),LANL2DZ(Bi)// B3LYP-D3/6-31G(d,p),LANL2DZ(Bi) level of theory.

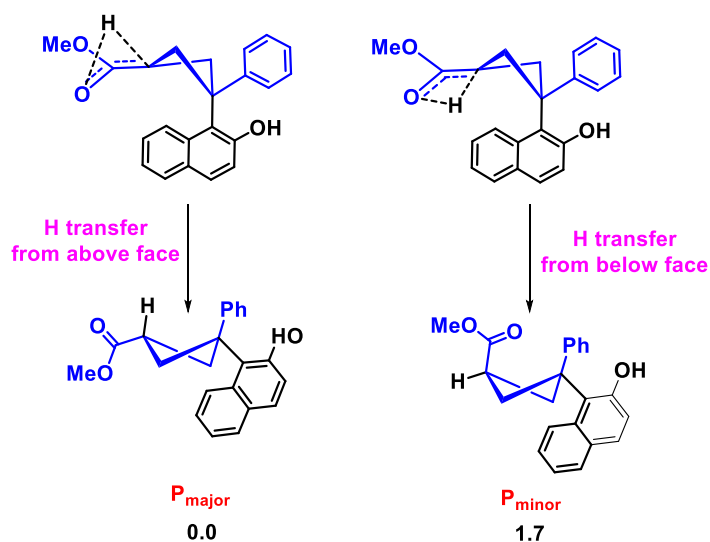

**Figure S4** Formation of the diastereomers via 1,3-proton transfer. Relative energies are given in kcal/mol.

### Coordinates

X

Number of imaginary frequencies : 0 Electronic energy : HF=-2889.7200833  
 Zero-point correction= 0.085258 (Hartree/Particle)  
 Thermal correction to Energy= 0.112284  
 Thermal correction to Enthalpy= 0.113228  
 Thermal correction to Gibbs Free Energy= 0.020820  
 Sum of electronic and zero-point Energies= -2889.634825  
 Sum of electronic and thermal Energies= -2889.607800  
 Sum of electronic and thermal Enthalpies= -2889.606855  
 Sum of electronic and thermal Free Energies= -2889.699263

#### Cartesian Coordinates

|    |           |           |           |
|----|-----------|-----------|-----------|
| 83 | 0.001127  | 0.000061  | 1.285094  |
| 8  | 1.450868  | 1.108307  | 0.329140  |
| 8  | -1.684834 | 0.702214  | 0.331965  |
| 8  | 0.234864  | -1.810686 | 0.330604  |
| 16 | 2.358430  | 0.813110  | -0.979580 |
| 16 | -0.475105 | -2.447832 | -0.978511 |
| 16 | -1.884237 | 1.634128  | -0.977951 |
| 8  | 1.775327  | -0.245202 | -1.784472 |
| 8  | 2.802531  | 2.082079  | -1.519522 |
| 6  | 3.796111  | 0.045115  | -0.064914 |
| 9  | 3.325706  | -0.933194 | 0.729542  |
| 9  | 4.649066  | -0.469572 | -0.941615 |
| 9  | 4.407440  | 0.957738  | 0.686548  |
| 8  | 0.400957  | -3.467398 | -1.518976 |
| 8  | -1.099131 | -1.412754 | -1.782938 |
| 6  | -1.859850 | -3.308627 | -0.064698 |
| 9  | -2.731981 | -3.788990 | -0.941874 |
| 9  | -1.375578 | -4.295072 | 0.686148  |
| 9  | -2.471665 | -2.412353 | 0.730273  |
| 8  | -3.205535 | 1.382962  | -1.516695 |
| 8  | -0.676850 | 1.658301  | -1.783838 |
| 6  | -1.938129 | 3.264057  | -0.064932 |

|   |           |          |           |
|---|-----------|----------|-----------|
| 9 | -3.032901 | 3.336535 | 0.688468  |
| 9 | -0.854243 | 3.347867 | 0.727343  |
| 9 | -1.921768 | 4.259108 | -0.942721 |

---

### A

---

Number of imaginary frequencies : 0 Electronic energy : HF=-2388.8582393  
Zero-point correction= 0.198153 (Hartree/Particle)  
Thermal correction to Energy= 0.225417  
Thermal correction to Enthalpy= 0.226361  
Thermal correction to Gibbs Free Energy= 0.134111  
Sum of electronic and zero-point Energies= -2388.660087  
Sum of electronic and thermal Energies= -2388.632822  
Sum of electronic and thermal Enthalpies= -2388.631878  
Sum of electronic and thermal Free Energies= -2388.724128

---

### Cartesian Coordinates

---

|    |           |           |           |
|----|-----------|-----------|-----------|
| 83 | 1.099959  | -0.345173 | -1.478549 |
| 8  | 1.057395  | 0.585047  | 0.481475  |
| 8  | 0.064285  | -1.983623 | -0.681093 |
| 16 | -0.897554 | -2.251609 | 0.566505  |
| 16 | 1.771259  | 1.970780  | 0.350622  |
| 8  | -1.810237 | -3.330161 | 0.223831  |
| 8  | -1.351279 | -1.012290 | 1.175405  |
| 6  | 0.400309  | -2.954585 | 1.708058  |
| 9  | -0.126301 | -3.130605 | 2.917496  |
| 9  | 0.847651  | -4.119618 | 1.238449  |
| 9  | 1.426336  | -2.093804 | 1.790631  |
| 8  | 1.001995  | 3.086868  | 0.865556  |
| 8  | 2.308330  | 1.998594  | -1.037938 |
| 6  | 3.237458  | 1.707892  | 1.472646  |
| 9  | 2.820770  | 1.529001  | 2.719645  |
| 9  | 3.897357  | 0.621510  | 1.054453  |
| 9  | 4.033264  | 2.770577  | 1.401580  |
| 6  | -1.709635 | 0.670158  | -1.535919 |
| 6  | -1.954322 | 1.669436  | -0.622930 |
| 6  | -3.190706 | 1.704728  | 0.070660  |
| 6  | -4.173743 | 0.695848  | -0.194755 |
| 6  | -3.881063 | -0.309089 | -1.154860 |
| 6  | -2.676657 | -0.326260 | -1.817302 |
| 1  | -2.724585 | 3.463487  | 1.241602  |
| 1  | -1.195960 | 2.415668  | -0.411220 |
| 6  | -3.476884 | 2.706567  | 1.036620  |
| 6  | -5.403823 | 0.731470  | 0.513605  |
| 1  | -4.620399 | -1.079815 | -1.353637 |
| 1  | -2.439534 | -1.099127 | -2.540761 |
| 6  | -5.653137 | 1.716473  | 1.442857  |
| 6  | -4.679566 | 2.712047  | 1.706567  |
| 1  | -6.145567 | -0.037002 | 0.311576  |
| 1  | -6.596925 | 1.732628  | 1.980103  |
| 1  | -4.886125 | 3.481310  | 2.445123  |
| 8  | -0.493966 | 0.621038  | -2.212114 |

---

### B

---

Number of imaginary frequencies : 0 Electronic energy : HF=-3003.8188874  
Zero-point correction= 0.410909 (Hartree/Particle)  
Thermal correction to Energy= 0.452072  
Thermal correction to Enthalpy= 0.453017

|                                              |              |
|----------------------------------------------|--------------|
| Thermal correction to Gibbs Free Energy=     | 0.331851     |
| Sum of electronic and zero-point Energies=   | -3003.407979 |
| Sum of electronic and thermal Energies=      | -3003.366815 |
| Sum of electronic and thermal Enthalpies=    | -3003.365871 |
| Sum of electronic and thermal Free Energies= | -3003.487037 |

.....

# Cartesian Coordinates

.....

|    |           |           |           |
|----|-----------|-----------|-----------|
| 83 | 1.546321  | 1.127206  | -0.305356 |
| 8  | 2.395805  | -0.956316 | -0.977570 |
| 8  | -0.121169 | 5.238266  | 0.959483  |
| 16 | 2.645069  | -2.301581 | -0.294824 |
| 16 | 0.021190  | 4.183423  | -0.038422 |
| 8  | 2.738372  | -2.181693 | 1.171497  |
| 8  | 1.795138  | -3.368187 | -0.838270 |
| 6  | 4.373875  | -2.660359 | -0.874912 |
| 9  | 5.194505  | -1.678829 | -0.484840 |
| 9  | 4.789906  | -3.815361 | -0.345227 |
| 9  | 4.403811  | -2.752945 | -2.207353 |
| 8  | 0.314591  | 2.816666  | 0.614848  |
| 8  | 0.848892  | 4.391475  | -1.231138 |
| 6  | -1.713314 | 3.893799  | -0.676902 |
| 9  | -1.705307 | 3.177097  | -1.801695 |
| 9  | -2.445508 | 3.216482  | 0.243984  |
| 9  | -2.313168 | 5.062440  | -0.906948 |
| 6  | -0.938345 | -0.179530 | -1.672266 |
| 6  | -2.256970 | -0.029040 | -1.208192 |
| 6  | -3.225408 | -1.047352 | -1.423938 |
| 6  | -2.813777 | -2.298385 | -1.982864 |
| 6  | -1.438910 | -2.457682 | -2.355933 |
| 6  | -0.535912 | -1.436337 | -2.229520 |
| 1  | -4.900702 | 0.070762  | -0.641759 |
| 1  | -2.560091 | 0.938415  | -0.824750 |
| 6  | -4.583464 | -0.878859 | -1.062650 |
| 6  | -3.768603 | -3.321822 | -2.170313 |
| 1  | -1.114515 | -3.411815 | -2.762848 |
| 1  | 0.500709  | -1.561682 | -2.515316 |
| 6  | -5.092081 | -3.128925 | -1.811591 |
| 6  | -5.497607 | -1.899637 | -1.253774 |
| 1  | -3.448255 | -4.265744 | -2.603867 |
| 1  | -5.819349 | -3.920645 | -1.963907 |
| 1  | -6.536310 | -1.753651 | -0.971857 |
| 8  | -0.088183 | 0.832792  | -1.617853 |
| 8  | 2.562850  | 0.781810  | 2.149997  |
| 8  | 1.432386  | -0.677302 | 3.448896  |
| 6  | 0.477545  | -0.024893 | 1.350719  |
| 6  | -0.923277 | 0.519484  | 1.801322  |
| 1  | -1.002548 | 0.686983  | 2.885502  |
| 1  | -1.289251 | 1.420275  | 1.305889  |
| 6  | -1.520573 | -0.798969 | 1.417439  |
| 6  | -0.188532 | -1.422943 | 1.149159  |
| 1  | -0.050677 | -1.961232 | 0.209555  |
| 1  | 0.084656  | -2.121095 | 1.952747  |
| 6  | 1.589310  | 0.059212  | 2.356267  |
| 6  | -2.784718 | -1.375836 | 1.665129  |
| 6  | -3.840668 | -0.600537 | 2.207530  |
| 1  | -3.684781 | 0.459888  | 2.382066  |
| 6  | -5.049019 | -1.200482 | 2.529774  |
| 1  | -5.851166 | -0.611901 | 2.963048  |
| 6  | -5.232663 | -2.568789 | 2.289658  |

|   |           |           |          |
|---|-----------|-----------|----------|
| 1 | -6.180583 | -3.034776 | 2.541963 |
| 6 | -4.215589 | -3.338451 | 1.710795 |
| 1 | -4.379926 | -4.390673 | 1.505103 |
| 6 | -2.997802 | -2.752498 | 1.401242 |
| 1 | -2.199454 | -3.336435 | 0.955839 |
| 6 | 2.592393  | -0.775448 | 4.309137 |
| 1 | 2.889923  | 0.214374  | 4.660971 |
| 1 | 2.285800  | -1.410258 | 5.139440 |
| 1 | 3.408826  | -1.232727 | 3.746360 |

# C

Number of imaginary frequencies : 0 Electronic energy : HF=-3003.83963  
Zero-point correction= 0.414769 (Hartree/Particle)  
Thermal correction to Energy= 0.454872  
Thermal correction to Enthalpy= 0.455817  
Thermal correction to Gibbs Free Energy= 0.337091  
Sum of electronic and zero-point Energies= -3003.424861  
Sum of electronic and thermal Energies= -3003.384757  
Sum of electronic and thermal Enthalpies= -3003.383813  
Sum of electronic and thermal Free Energies= -3003.502539

## Cartesian Coordinates

|    |           |           |           |
|----|-----------|-----------|-----------|
| 83 | -1.730568 | -0.850375 | -0.269582 |
| 8  | -2.222654 | 1.361321  | -0.849113 |
| 8  | -1.342217 | -5.297119 | 0.227392  |
| 16 | -2.194171 | 2.682671  | -0.069768 |
| 16 | -0.894330 | -4.080249 | -0.438485 |
| 8  | -2.126744 | 2.466632  | 1.385686  |
| 8  | -1.283294 | 3.661693  | -0.672159 |
| 6  | -3.916835 | 3.297378  | -0.400764 |
| 9  | -4.806888 | 2.398291  | 0.036434  |
| 9  | -4.110181 | 4.452981  | 0.241513  |
| 9  | -4.095152 | 3.487610  | -1.711133 |
| 8  | -0.946571 | -2.844266 | 0.490073  |
| 8  | -1.399617 | -3.736712 | -1.775397 |
| 6  | 0.951066  | -4.282518 | -0.625381 |
| 9  | 1.481958  | -3.240431 | -1.289635 |
| 9  | 1.533769  | -4.344207 | 0.581374  |
| 9  | 1.218248  | -5.401344 | -1.299069 |
| 6  | 0.918829  | 0.207319  | -1.672701 |
| 6  | 2.231373  | 0.127378  | -0.921023 |
| 6  | 3.259370  | 1.115914  | -1.422175 |
| 6  | 2.839114  | 2.298819  | -2.074825 |
| 6  | 1.454940  | 2.434070  | -2.465475 |
| 6  | 0.550979  | 1.425150  | -2.334483 |
| 1  | 4.965032  | 0.007105  | -0.731699 |
| 1  | 2.607509  | -0.896533 | -1.007548 |
| 6  | 4.623986  | 0.915918  | -1.214691 |
| 6  | 3.780916  | 3.282083  | -2.431447 |
| 1  | 1.142918  | 3.365962  | -2.930209 |
| 1  | -0.469925 | 1.521820  | -2.680934 |
| 6  | 5.133172  | 3.083421  | -2.180499 |
| 6  | 5.553421  | 1.888607  | -1.587883 |
| 1  | 3.438858  | 4.188461  | -2.923438 |
| 1  | 5.857952  | 3.842326  | -2.457536 |
| 1  | 6.609710  | 1.713827  | -1.407811 |
| 8  | 0.120817  | -0.771463 | -1.620019 |
| 8  | -2.300884 | -0.547429 | 2.077218  |

|   |           |           |          |
|---|-----------|-----------|----------|
| 8 | -0.863593 | 0.543657  | 3.424951 |
| 6 | -0.192377 | -0.020811 | 1.178339 |
| 6 | 1.109942  | -0.866349 | 1.269680 |
| 1 | 1.400057  | -1.046341 | 2.308938 |
| 1 | 1.123110  | -1.812657 | 0.736784 |
| 6 | 1.921708  | 0.323466  | 0.672694 |
| 6 | 0.693263  | 1.237714  | 0.969409 |
| 1 | 0.398802  | 1.974339  | 0.225304 |
| 1 | 0.808908  | 1.759245  | 1.923010 |
| 6 | -1.187323 | -0.023628 | 2.289153 |
| 6 | 3.198851  | 0.637399  | 1.416137 |
| 6 | 4.042195  | -0.402739 | 1.830809 |
| 1 | 3.758790  | -1.434295 | 1.636243 |
| 6 | 5.242862  | -0.128439 | 2.486698 |
| 1 | 5.884259  | -0.946010 | 2.802956 |
| 6 | 5.614410  | 1.193740  | 2.741249 |
| 1 | 6.546799  | 1.409243  | 3.254736 |
| 6 | 4.777803  | 2.236307  | 2.337387 |
| 1 | 5.058534  | 3.267226  | 2.532391 |
| 6 | 3.580086  | 1.958661  | 1.678652 |
| 1 | 2.944324  | 2.775568  | 1.349405 |
| 6 | -1.939961 | 0.732473  | 4.379917 |
| 1 | -2.369020 | -0.231272 | 4.659736 |
| 1 | -1.480534 | 1.222131  | 5.236784 |
| 1 | -2.701368 | 1.367608  | 3.923152 |

# D

Number of imaginary frequencies : 1 Electronic energy : HF=-3003.7382187  
Zero-point correction= 0.407880 (Hartree/Particle)  
Thermal correction to Energy= 0.447944  
Thermal correction to Enthalpy= 0.448888  
Thermal correction to Gibbs Free Energy= 0.328882  
Sum of electronic and zero-point Energies= -3003.330338  
Sum of electronic and thermal Energies= -3003.290275  
Sum of electronic and thermal Enthalpies= -3003.289331  
Sum of electronic and thermal Free Energies= -3003.409337

## Cartesian Coordinates

|    |           |           |           |
|----|-----------|-----------|-----------|
| 83 | 1.748445  | 0.701075  | -0.124272 |
| 8  | 1.827502  | -1.459039 | -1.003788 |
| 8  | 1.449714  | 5.155092  | 0.172551  |
| 16 | 2.191510  | -2.720988 | -0.202587 |
| 16 | 0.953620  | 3.954639  | -0.488518 |
| 8  | 2.332311  | -2.416931 | 1.232650  |
| 8  | 1.402542  | -3.881178 | -0.612683 |
| 6  | 3.925259  | -2.999209 | -0.811569 |
| 9  | 4.651725  | -1.892826 | -0.583064 |
| 9  | 4.479564  | -4.025891 | -0.164087 |
| 9  | 3.922998  | -3.252713 | -2.122588 |
| 8  | 0.923801  | 2.728991  | 0.455727  |
| 8  | 1.459704  | 3.572331  | -1.813203 |
| 6  | -0.878721 | 4.235014  | -0.693720 |
| 9  | -1.440395 | 3.231037  | -1.395910 |
| 9  | -1.475879 | 4.284332  | 0.505946  |
| 9  | -1.096059 | 5.378325  | -1.340956 |
| 6  | -0.944753 | -0.420304 | -1.591897 |
| 6  | -2.114077 | -0.284417 | -0.772938 |
| 6  | -3.313831 | -0.893467 | -1.361437 |

|   |           |           |           |
|---|-----------|-----------|-----------|
| 6 | -3.143168 | -1.838382 | -2.428495 |
| 6 | -1.842879 | -2.102892 | -2.960203 |
| 6 | -0.734802 | -1.372281 | -2.591633 |
| 1 | -4.797007 | 0.137902  | -0.180611 |
| 1 | -1.369935 | 0.991250  | -0.935188 |
| 6 | -4.630801 | -0.601788 | -0.951397 |
| 6 | -4.272759 | -2.487503 | -2.986654 |
| 1 | -1.752824 | -2.844880 | -3.749224 |
| 1 | 0.229711  | -1.465307 | -3.072944 |
| 6 | -5.545814 | -2.196719 | -2.542142 |
| 6 | -5.719211 | -1.232761 | -1.530991 |
| 1 | -4.119102 | -3.204376 | -3.788719 |
| 1 | -6.407498 | -2.690019 | -2.980504 |
| 1 | -6.720530 | -0.972212 | -1.201192 |
| 8 | -0.178787 | 0.683669  | -1.379387 |
| 8 | 2.348000  | 0.463408  | 2.324347  |
| 8 | 0.881976  | -0.644209 | 3.630072  |
| 6 | 0.251143  | -0.066582 | 1.382459  |
| 6 | -1.054498 | 0.770728  | 1.502710  |
| 1 | -1.344471 | 0.865716  | 2.553105  |
| 1 | -1.067830 | 1.764346  | 1.055964  |
| 6 | -1.861819 | -0.387162 | 0.827184  |
| 6 | -0.626997 | -1.314736 | 1.126316  |
| 1 | -0.330872 | -2.010545 | 0.343026  |
| 1 | -0.761120 | -1.876894 | 2.054525  |
| 6 | 1.238890  | -0.065922 | 2.502349  |
| 6 | -3.123427 | -0.768674 | 1.571333  |
| 6 | -3.907077 | 0.199526  | 2.212466  |
| 1 | -3.614694 | 1.245129  | 2.169891  |
| 6 | -5.072776 | -0.161343 | 2.890497  |
| 1 | -5.670157 | 0.602749  | 3.379443  |
| 6 | -5.466254 | -1.499807 | 2.943147  |
| 1 | -6.370916 | -1.782499 | 3.473312  |
| 6 | -4.686485 | -2.473917 | 2.315145  |
| 1 | -4.983126 | -3.517975 | 2.353135  |
| 6 | -3.526019 | -2.109067 | 1.634656  |
| 1 | -2.932508 | -2.869068 | 1.134068  |
| 6 | 1.912688  | -0.764408 | 4.642079  |
| 1 | 2.261281  | 0.225338  | 4.943482  |
| 1 | 1.440293  | -1.283865 | 5.474202  |
| 1 | 2.745713  | -1.343482 | 4.238479  |

# E

Number of imaginary frequencies : 0 Electronic energy : HF=-3464.9700678  
Zero-point correction= 0.568040 (Hartree/Particle)  
Thermal correction to Energy= 0.617618  
Thermal correction to Enthalpy= 0.618562  
Thermal correction to Gibbs Free Energy= 0.477863  
Sum of electronic and zero-point Energies= -3464.402028  
Sum of electronic and thermal Energies= -3464.352450  
Sum of electronic and thermal Enthalpies= -3464.351505  
Sum of electronic and thermal Free Energies= -3464.492204

## Cartesian Coordinates

|    |           |           |           |
|----|-----------|-----------|-----------|
| 83 | -1.046899 | -0.510065 | -0.439526 |
| 8  | -0.058971 | -2.472734 | -2.575868 |
| 8  | -0.309125 | -1.428741 | 1.376417  |
| 16 | -1.058906 | -3.348777 | -1.937448 |

|    |           |           |           |
|----|-----------|-----------|-----------|
| 16 | -0.098474 | -1.100533 | 2.870771  |
| 8  | -1.776247 | -2.534368 | -0.815722 |
| 8  | -1.988993 | -4.120550 | -2.744400 |
| 6  | -0.098881 | -4.579980 | -0.911783 |
| 9  | 0.482790  | -3.958854 | 0.121835  |
| 9  | -0.907992 | -5.530452 | -0.456295 |
| 9  | 0.851878  | -5.126116 | -1.678615 |
| 8  | -0.187491 | 0.346069  | 3.149771  |
| 8  | 1.053661  | -1.840362 | 3.387567  |
| 6  | -1.627688 | -1.852336 | 3.624372  |
| 9  | -1.581119 | -1.683178 | 4.944234  |
| 9  | -2.697930 | -1.232998 | 3.125882  |
| 9  | -1.677049 | -3.147000 | 3.331517  |
| 6  | 3.006167  | -0.478879 | 0.689370  |
| 6  | 3.282207  | 0.583023  | -0.172318 |
| 6  | 3.435092  | 0.266261  | -1.570104 |
| 6  | 3.051383  | -1.026611 | -2.063171 |
| 6  | 2.639292  | -2.023569 | -1.142550 |
| 6  | 2.656657  | -1.767647 | 0.202442  |
| 1  | 4.401163  | 2.115333  | -2.174255 |
| 1  | 2.665105  | -1.042344 | 2.514641  |
| 6  | 3.987866  | 1.176804  | -2.517657 |
| 6  | 3.109076  | -1.306186 | -3.453764 |
| 1  | 2.334146  | -2.993636 | -1.516047 |
| 1  | 2.379066  | -2.535428 | 0.917037  |
| 6  | 3.597457  | -0.377358 | -4.343166 |
| 6  | 4.069965  | 0.863258  | -3.857440 |
| 1  | 2.762183  | -2.276914 | -3.796253 |
| 1  | 3.644458  | -0.601339 | -5.404530 |
| 1  | 4.513144  | 1.577078  | -4.546313 |
| 8  | 3.069369  | -0.294534 | 2.043237  |
| 8  | -0.718116 | 1.625948  | 0.894786  |
| 8  | -0.431340 | 2.443244  | -1.169433 |
| 6  | 1.383500  | 2.710812  | 0.357700  |
| 6  | 2.320339  | 2.337875  | 1.471704  |
| 1  | 2.645966  | 3.220555  | 2.033548  |
| 1  | 2.047363  | 1.550477  | 2.167163  |
| 6  | 3.392379  | 2.037089  | 0.331258  |
| 6  | 2.521949  | 3.023435  | -0.571243 |
| 1  | 2.371631  | 2.797372  | -1.624950 |
| 1  | 2.879873  | 4.052010  | -0.458439 |
| 6  | 0.147008  | 2.335237  | 0.062285  |
| 6  | 4.825266  | 2.439651  | 0.648692  |
| 6  | 5.498798  | 1.798927  | 1.701806  |
| 1  | 4.984993  | 1.027369  | 2.265314  |
| 6  | 6.810396  | 2.143546  | 2.022176  |
| 1  | 7.312838  | 1.637487  | 2.841992  |
| 6  | 7.480052  | 3.131735  | 1.294952  |
| 1  | 8.503374  | 3.397426  | 1.544005  |
| 6  | 6.822058  | 3.772917  | 0.246860  |
| 1  | 7.329874  | 4.542360  | -0.328096 |
| 6  | 5.504263  | 3.430864  | -0.069624 |
| 1  | 5.010879  | 3.947113  | -0.887644 |
| 6  | -1.418648 | 3.500386  | -1.255544 |
| 1  | -1.924870 | 3.377695  | -2.212975 |
| 1  | -2.147155 | 3.416818  | -0.445659 |
| 1  | -0.914974 | 4.471407  | -1.215409 |
| 6  | -3.592307 | 0.898937  | 0.223574  |
| 6  | -4.119445 | 1.351068  | -0.969025 |
| 6  | -4.821439 | 2.583936  | -1.028974 |

|   |           |           |           |
|---|-----------|-----------|-----------|
| 6 | -4.981204 | 3.352856  | 0.170790  |
| 6 | -4.440244 | 2.843557  | 1.385299  |
| 6 | -3.762892 | 1.648911  | 1.418102  |
| 1 | -5.235900 | 2.508766  | -3.153019 |
| 1 | -4.006748 | 0.749918  | -1.867963 |
| 6 | -5.353636 | 3.093140  | -2.244022 |
| 6 | -5.665111 | 4.595239  | 0.106533  |
| 1 | -4.563871 | 3.422769  | 2.296628  |
| 1 | -3.333037 | 1.255634  | 2.332607  |
| 6 | -6.167554 | 5.063813  | -1.087589 |
| 6 | -6.009313 | 4.304491  | -2.272807 |
| 1 | -5.785189 | 5.173131  | 1.019404  |
| 1 | -6.688090 | 6.016077  | -1.124463 |
| 1 | -6.410788 | 4.681594  | -3.208913 |
| 8 | -2.919402 | -0.293930 | 0.294039  |
| 1 | -0.363528 | 1.451463  | 1.797159  |

---

**F**

---

Number of imaginary frequencies : 0 Electronic energy : HF=-3465.0214057  
Zero-point correction= 0.568301 (Hartree/Particle)  
Thermal correction to Energy= 0.618123  
Thermal correction to Enthalpy= 0.619067  
Thermal correction to Gibbs Free Energy= 0.476877  
Sum of electronic and zero-point Energies= -3464.453105  
Sum of electronic and thermal Energies= -3464.403282  
Sum of electronic and thermal Enthalpies= -3464.402338  
Sum of electronic and thermal Free Energies= -3464.544529

.....  
Cartesian Coordinates

.....  
83 -0.974049 -0.472924 -0.436915  
8 1.776731 -0.721504 -1.524186  
8 -0.962028 -2.262700 1.057230  
16 1.180731 -1.818744 -2.311905  
16 -1.658795 -1.675717 2.288376  
8 -0.328525 -1.923789 -1.931055  
8 1.396951 -1.874991 -3.751889  
6 1.845557 -3.402882 -1.582247  
9 1.395486 -3.533128 -0.333722  
9 1.442466 -4.438927 -2.314283  
9 3.177337 -3.345591 -1.575611  
8 -2.291679 -0.393346 1.869667  
8 -0.833478 -1.651804 3.499692  
6 -3.045686 -2.877013 2.609088  
9 -3.833308 -2.385290 3.563137  
9 -3.749986 -3.046873 1.487503  
9 -2.537970 -4.044627 2.996882  
6 1.999902 -0.036906 1.739919  
6 2.884898 0.682740 0.947232  
6 4.108000 0.029272 0.561247  
6 4.298826 -1.365795 0.831962  
6 3.308596 -2.065013 1.566224  
6 2.202911 -1.411225 2.037273  
1 5.123075 1.790413 -0.210284  
1 0.467298 0.016242 2.915736  
6 5.181858 0.718749 -0.072124  
6 5.476124 -2.021068 0.386551  
1 3.440957 -3.125030 1.762134  
1 1.449803 -1.935429 2.615726

|   |           |           |           |
|---|-----------|-----------|-----------|
| 6 | 6.471051  | -1.329276 | -0.264607 |
| 6 | 6.325168  | 0.061060  | -0.472016 |
| 1 | 5.580301  | -3.085074 | 0.583304  |
| 1 | 7.370077  | -1.838714 | -0.598147 |
| 1 | 7.126915  | 0.621650  | -0.944318 |
| 8 | 0.861835  | 0.573484  | 2.224900  |
| 8 | -0.395667 | 1.337541  | -2.069486 |
| 8 | 1.078636  | 2.199605  | -3.512055 |
| 6 | 1.394070  | 2.801979  | -1.267095 |
| 6 | 1.110590  | 2.517264  | 0.217738  |
| 1 | 0.772417  | 3.371426  | 0.805363  |
| 1 | 0.403522  | 1.711659  | 0.377755  |
| 6 | 2.618955  | 2.113491  | 0.474698  |
| 6 | 2.852313  | 2.292041  | -1.082570 |
| 1 | 3.041539  | 1.349020  | -1.592220 |
| 1 | 3.620659  | 3.012058  | -1.367285 |
| 6 | 0.598607  | 2.041073  | -2.292019 |
| 6 | 3.336961  | 3.158655  | 1.333046  |
| 6 | 3.912882  | 2.823417  | 2.564897  |
| 1 | 3.877708  | 1.794626  | 2.905223  |
| 6 | 4.537490  | 3.790586  | 3.354893  |
| 1 | 4.978951  | 3.501168  | 4.304413  |
| 6 | 4.597474  | 5.117609  | 2.930843  |
| 1 | 5.084806  | 5.869755  | 3.544313  |
| 6 | 4.022681  | 5.469486  | 1.707803  |
| 1 | 4.058769  | 6.499370  | 1.363556  |
| 6 | 3.400320  | 4.500858  | 0.921730  |
| 1 | 2.957230  | 4.803783  | -0.023212 |
| 6 | 0.459098  | 1.431789  | -4.577966 |
| 1 | 0.902840  | 1.814744  | -5.495432 |
| 1 | 0.691595  | 0.372552  | -4.449842 |
| 1 | -0.621956 | 1.582059  | -4.572627 |
| 6 | -3.810047 | 0.121282  | -0.859424 |
| 6 | -3.719955 | 1.461238  | -1.182656 |
| 6 | -4.757898 | 2.360939  | -0.820877 |
| 6 | -5.904527 | 1.859972  | -0.122190 |
| 6 | -5.961991 | 0.472256  | 0.185717  |
| 6 | -4.944182 | -0.379467 | -0.166842 |
| 1 | -3.829945 | 4.126181  | -1.662903 |
| 1 | -2.862666 | 1.827145  | -1.741746 |
| 6 | -4.698576 | 3.745964  | -1.130950 |
| 6 | -6.939386 | 2.761456  | 0.239554  |
| 1 | -6.828245 | 0.090722  | 0.720109  |
| 1 | -4.966290 | -1.432572 | 0.085908  |
| 6 | -6.851734 | 4.100334  | -0.073227 |
| 6 | -5.719823 | 4.595397  | -0.765760 |
| 1 | -7.805918 | 2.375520  | 0.770650  |
| 1 | -7.649630 | 4.780606  | 0.209569  |
| 1 | -5.659802 | 5.652491  | -1.008744 |
| 8 | -2.823773 | -0.774232 | -1.211939 |
| 1 | 1.349676  | 3.859889  | -1.545838 |

---

### G

---

Number of imaginary frequencies : 0    Electronic energy :        HF=-3003.7322304  
 Zero-point correction=                    0.410421 (Hartree/Particle)  
 Thermal correction to Energy=            0.451159  
 Thermal correction to Enthalpy=        0.452103  
 Thermal correction to Gibbs Free Energy=    0.329805  
 Sum of electronic and zero-point Energies=    -3003.321810

|                                              |              |
|----------------------------------------------|--------------|
| Sum of electronic and thermal Energies=      | -3003.281072 |
| Sum of electronic and thermal Enthalpies=    | -3003.280127 |
| Sum of electronic and thermal Free Energies= | -3003.402426 |

.....  
Cartesian Coordinates  
.....

|    |           |           |           |
|----|-----------|-----------|-----------|
| 83 | 0.849030  | -0.788760 | 0.964942  |
| 8  | 2.719150  | 0.190009  | 1.197744  |
| 8  | 1.072457  | -0.747531 | -1.190528 |
| 16 | 3.191293  | 1.587316  | 0.601402  |
| 16 | 1.689566  | -2.119665 | -1.633380 |
| 8  | 3.112947  | 1.581741  | -0.858217 |
| 8  | 2.649040  | 2.699231  | 1.370212  |
| 6  | 4.995734  | 1.437196  | 1.059239  |
| 9  | 5.539714  | 0.372340  | 0.471995  |
| 9  | 5.618145  | 2.541537  | 0.643704  |
| 9  | 5.115495  | 1.328008  | 2.382107  |
| 8  | 1.030029  | -2.717781 | -2.775945 |
| 8  | 1.847131  | -2.873140 | -0.355126 |
| 6  | 3.408234  | -1.616410 | -2.175518 |
| 9  | 3.987092  | -2.673441 | -2.743124 |
| 9  | 3.319423  | -0.621608 | -3.047956 |
| 9  | 4.110808  | -1.238921 | -1.110915 |
| 6  | -0.774168 | 1.729399  | -0.118414 |
| 6  | -2.209555 | 1.904895  | 0.216687  |
| 6  | -2.929267 | 2.884617  | -0.660913 |
| 6  | -2.316014 | 3.381476  | -1.842797 |
| 6  | -0.963050 | 3.023875  | -2.138610 |
| 6  | -0.204989 | 2.235165  | -1.292851 |
| 1  | -4.666945 | 2.966737  | 0.603546  |
| 1  | -2.289077 | 2.247156  | 1.252823  |
| 6  | -4.209769 | 3.335480  | -0.311236 |
| 6  | -3.044771 | 4.268026  | -2.672734 |
| 1  | -0.510864 | 3.418180  | -3.044221 |
| 1  | 0.835043  | 2.012365  | -1.503761 |
| 6  | -4.318784 | 4.679774  | -2.323440 |
| 6  | -4.901427 | 4.221453  | -1.128488 |
| 1  | -2.578634 | 4.636259  | -3.582747 |
| 1  | -4.864504 | 5.364571  | -2.965330 |
| 1  | -5.895321 | 4.555189  | -0.846267 |
| 8  | -0.066972 | 1.048967  | 0.775714  |
| 8  | -3.208788 | -3.452719 | -1.055105 |
| 8  | -5.279699 | -2.496650 | -1.214783 |
| 6  | -3.430053 | -1.101867 | -1.057373 |
| 6  | -2.109984 | -0.667841 | -0.578425 |
| 1  | -1.536997 | -1.436773 | -0.019902 |
| 1  | -1.433159 | -0.198808 | -1.312664 |
| 6  | -2.901958 | 0.411281  | 0.250210  |
| 6  | -4.095864 | 0.192130  | -0.756809 |
| 1  | -4.018699 | 0.934480  | -1.565690 |
| 1  | -5.122601 | 0.201269  | -0.379676 |
| 6  | -3.909160 | -2.445493 | -1.116633 |
| 6  | -3.191810 | -0.082974 | 1.672100  |
| 6  | -2.348516 | 0.248537  | 2.749322  |
| 1  | -1.513948 | 0.922952  | 2.599306  |
| 6  | -2.566658 | -0.262462 | 4.031684  |
| 1  | -1.900655 | 0.025494  | 4.840566  |
| 6  | -3.633725 | -1.126023 | 4.273663  |
| 1  | -3.805380 | -1.525660 | 5.268681  |
| 6  | -4.479982 | -1.465442 | 3.218080  |

|   |           |           |           |
|---|-----------|-----------|-----------|
| 1 | -5.316168 | -2.138430 | 3.384624  |
| 6 | -4.264983 | -0.951162 | 1.938495  |
| 1 | -4.936331 | -1.254253 | 1.144174  |
| 6 | -5.820594 | -3.820640 | -1.260017 |
| 1 | -5.565461 | -4.380393 | -0.354499 |
| 1 | -6.901956 | -3.699544 | -1.340722 |
| 1 | -5.433381 | -4.372332 | -2.122096 |

---

**K**

---

Number of imaginary frequencies : 0 Electronic energy : HF=-2543.0202937  
Zero-point correction= 0.269804 (Hartree/Particle)  
Thermal correction to Energy= 0.302081  
Thermal correction to Enthalpy= 0.303025  
Thermal correction to Gibbs Free Energy= 0.199771  
Sum of electronic and zero-point Energies= -2542.750489  
Sum of electronic and thermal Energies= -2542.718213  
Sum of electronic and thermal Enthalpies= -2542.717269  
Sum of electronic and thermal Free Energies= -2542.820523

---

Cartesian Coordinates

---

|    |           |           |           |
|----|-----------|-----------|-----------|
| 83 | 0.727550  | -0.428449 | -1.568777 |
| 8  | 1.503289  | 1.205421  | -0.505824 |
| 8  | 3.100566  | -2.113738 | -0.942234 |
| 16 | 0.851760  | 1.938537  | 0.744587  |
| 16 | 2.310961  | -2.508830 | 0.235942  |
| 8  | -0.382198 | 2.619188  | 0.337676  |
| 8  | 0.817239  | 1.062178  | 1.911127  |
| 6  | 2.195756  | 3.215983  | 0.998110  |
| 9  | 2.304565  | 3.958682  | -0.095979 |
| 9  | 1.836976  | 3.968197  | 2.032926  |
| 9  | 3.337058  | 2.591089  | 1.253317  |
| 8  | 2.135059  | -3.896778 | 0.618204  |
| 8  | 0.899771  | -1.782727 | 0.084947  |
| 6  | 3.004293  | -1.584406 | 1.710347  |
| 9  | 3.311477  | -0.342800 | 1.335669  |
| 9  | 2.091211  | -1.558730 | 2.676196  |
| 9  | 4.094977  | -2.215929 | 2.123806  |
| 8  | -1.115047 | 1.267705  | -2.435882 |
| 8  | -2.912429 | 1.541307  | -1.089606 |
| 6  | -1.384460 | -0.276020 | -0.688462 |
| 6  | -2.319789 | -1.551705 | -0.783651 |
| 1  | -2.972779 | -1.694698 | -1.646478 |
| 1  | -1.720006 | -2.450360 | -0.597259 |
| 6  | -2.902084 | -0.996145 | 0.471160  |
| 6  | -1.681583 | -0.250279 | 0.858633  |
| 1  | -0.926285 | -0.858677 | 1.369542  |
| 1  | -1.789973 | 0.710165  | 1.358159  |
| 6  | -1.819203 | 0.926814  | -1.483430 |
| 6  | -4.236030 | -0.852673 | 0.880190  |
| 6  | -5.278392 | -1.555200 | 0.207161  |
| 1  | -5.044462 | -2.170318 | -0.655363 |
| 6  | -6.579933 | -1.463966 | 0.664363  |
| 1  | -7.377489 | -1.999966 | 0.161558  |
| 6  | -6.865888 | -0.672006 | 1.789454  |
| 1  | -7.890308 | -0.602170 | 2.143558  |
| 6  | -5.854626 | 0.029121  | 2.466787  |
| 1  | -6.099670 | 0.631417  | 3.334768  |
| 6  | -4.548400 | -0.055460 | 2.020702  |

|   |           |          |           |
|---|-----------|----------|-----------|
| 1 | -3.757309 | 0.478428 | 2.536054  |
| 6 | -3.192790 | 2.826845 | -1.723218 |
| 1 | -3.293206 | 2.696573 | -2.801463 |
| 1 | -4.124799 | 3.166824 | -1.276670 |
| 1 | -2.371476 | 3.508295 | -1.495940 |

---

**K'**

---

Number of imaginary frequencies : 0 Electronic energy : HF=-3004.195701  
 Zero-point correction= 0.423858 (Hartree/Particle)  
 Thermal correction to Energy= 0.465399  
 Thermal correction to Enthalpy= 0.466343  
 Thermal correction to Gibbs Free Energy= 0.344135  
 Sum of electronic and zero-point Energies= -3003.771843  
 Sum of electronic and thermal Energies= -3003.730302  
 Sum of electronic and thermal Enthalpies= -3003.729358  
 Sum of electronic and thermal Free Energies= -3003.851566

---

Cartesian Coordinates

---

|    |           |           |           |
|----|-----------|-----------|-----------|
| 83 | -2.117115 | 1.089687  | -1.057797 |
| 8  | -3.247616 | 0.175230  | 0.458390  |
| 8  | -0.713222 | 4.686350  | 0.145668  |
| 16 | -2.947675 | -0.993284 | 1.482125  |
| 16 | -0.234607 | 3.317334  | 0.205642  |
| 8  | -1.776695 | -1.768459 | 1.045039  |
| 8  | -3.049177 | -0.529552 | 2.851988  |
| 6  | -4.428217 | -2.064170 | 1.100542  |
| 9  | -4.354401 | -2.456493 | -0.178471 |
| 9  | -4.385364 | -3.130268 | 1.894397  |
| 9  | -5.548923 | -1.386036 | 1.298481  |
| 8  | 0.472098  | 2.742133  | -0.964122 |
| 8  | -1.320350 | 2.283865  | 0.629837  |
| 6  | 0.953839  | 3.227152  | 1.652660  |
| 9  | 0.540778  | 4.020656  | 2.624760  |
| 9  | 1.041974  | 1.967617  | 2.112001  |
| 9  | 2.157593  | 3.609469  | 1.220641  |
| 6  | 3.691126  | -2.001665 | -1.942783 |
| 6  | 2.728595  | -2.583327 | -1.127450 |
| 6  | 3.016629  | -2.882752 | 0.228809  |
| 6  | 4.295025  | -2.525266 | 0.764345  |
| 6  | 5.247536  | -1.914606 | -0.102834 |
| 6  | 4.965069  | -1.664115 | -1.426479 |
| 1  | 1.088611  | -3.767935 | 0.677688  |
| 1  | 1.770334  | -2.859436 | -1.552081 |
| 6  | 2.052622  | -3.475990 | 1.085451  |
| 6  | 4.566090  | -2.774485 | 2.131892  |
| 1  | 6.219868  | -1.643695 | 0.298415  |
| 1  | 5.704892  | -1.195774 | -2.069806 |
| 6  | 3.604597  | -3.339123 | 2.947426  |
| 6  | 2.340640  | -3.689388 | 2.420405  |
| 1  | 5.540918  | -2.510512 | 2.532836  |
| 1  | 3.819153  | -3.522934 | 3.995163  |
| 1  | 1.594621  | -4.137902 | 3.068782  |
| 8  | 3.331273  | -1.724959 | -3.224757 |
| 8  | -2.297409 | -1.238956 | -2.023483 |
| 8  | -0.653437 | -2.697387 | -1.514775 |
| 6  | -0.341525 | -0.342211 | -1.087097 |
| 6  | 0.910607  | 0.040747  | -1.962571 |
| 1  | 1.210038  | -0.734018 | -2.677424 |

|   |           |           |           |
|---|-----------|-----------|-----------|
| 1 | 0.893469  | 1.001598  | -2.481690 |
| 6 | 1.722441  | 0.029962  | -0.698006 |
| 6 | 0.595561  | -0.496571 | 0.134034  |
| 1 | 0.357879  | 0.120368  | 1.003502  |
| 1 | 0.692352  | -1.523963 | 0.495722  |
| 6 | -1.169876 | -1.492110 | -1.570203 |
| 6 | 2.908047  | 0.689166  | -0.335623 |
| 6 | 3.608127  | 1.493648  | -1.276279 |
| 1 | 3.227404  | 1.583584  | -2.287849 |
| 6 | 4.734957  | 2.192360  | -0.885373 |
| 1 | 5.254850  | 2.831494  | -1.591130 |
| 6 | 5.196856  | 2.088937  | 0.438404  |
| 1 | 6.075754  | 2.649762  | 0.742073  |
| 6 | 4.539708  | 1.277343  | 1.369680  |
| 1 | 4.912531  | 1.201158  | 2.385487  |
| 6 | 3.401299  | 0.580102  | 0.992616  |
| 1 | 2.877917  | -0.046188 | 1.705925  |
| 6 | -1.551159 | -3.800781 | -1.844782 |
| 1 | -1.858607 | -3.726972 | -2.888794 |
| 1 | -0.969222 | -4.702736 | -1.668034 |
| 1 | -2.421592 | -3.750691 | -1.189925 |
| 1 | 4.085710  | -1.381794 | -3.723268 |

---

### M

---

Number of imaginary frequencies : 0 Electronic energy : HF=-3004.2019671  
 Zero-point correction= 0.427766 (Hartree/Particle)  
 Thermal correction to Energy= 0.467842  
 Thermal correction to Enthalpy= 0.468786  
 Thermal correction to Gibbs Free Energy= 0.351607  
 Sum of electronic and zero-point Energies= -3003.774201  
 Sum of electronic and thermal Energies= -3003.734125  
 Sum of electronic and thermal Enthalpies= -3003.733181  
 Sum of electronic and thermal Free Energies= -3003.850360

---

### Cartesian Coordinates

---

|    |           |           |           |
|----|-----------|-----------|-----------|
| 83 | -2.188017 | 1.010580  | -0.600669 |
| 8  | -2.499052 | -0.312210 | 1.098408  |
| 8  | -1.524555 | 4.815871  | 0.628153  |
| 16 | -2.495430 | -1.845834 | 1.370658  |
| 16 | -0.867610 | 3.567612  | 0.294657  |
| 8  | -1.613100 | -2.563912 | 0.430736  |
| 8  | -2.379506 | -2.116590 | 2.793009  |
| 6  | -4.225359 | -2.278397 | 0.826658  |
| 9  | -4.420960 | -1.779169 | -0.406040 |
| 9  | -4.353705 | -3.601812 | 0.788695  |
| 9  | -5.113419 | -1.753449 | 1.660812  |
| 8  | -0.826292 | 3.127987  | -1.144052 |
| 8  | -1.366224 | 2.315909  | 1.053808  |
| 6  | 0.929475  | 3.734106  | 0.846620  |
| 9  | 1.042922  | 4.749900  | 1.684495  |
| 9  | 1.321252  | 2.607388  | 1.446156  |
| 9  | 1.682922  | 3.944603  | -0.236209 |
| 6  | 3.797909  | -1.188843 | -1.893010 |
| 6  | 2.578740  | -1.600088 | -1.156948 |
| 6  | 2.837893  | -2.614094 | -0.079861 |
| 6  | 4.151794  | -2.759206 | 0.446461  |
| 6  | 5.229364  | -2.099472 | -0.207112 |
| 6  | 5.079883  | -1.375613 | -1.378784 |

|   |           |           |           |
|---|-----------|-----------|-----------|
| 1 | 0.809703  | -3.342520 | 0.042604  |
| 1 | 1.833444  | -1.975153 | -1.859538 |
| 6 | 1.811914  | -3.393386 | 0.453397  |
| 6 | 4.391953  | -3.620527 | 1.542736  |
| 1 | 6.228671  | -2.216357 | 0.205361  |
| 1 | 5.943144  | -0.952791 | -1.883515 |
| 6 | 3.349701  | -4.350026 | 2.091132  |
| 6 | 2.067021  | -4.246731 | 1.532501  |
| 1 | 5.400058  | -3.713028 | 1.936223  |
| 1 | 3.525772  | -5.010623 | 2.933129  |
| 1 | 1.252043  | -4.836673 | 1.940259  |
| 8 | 3.565997  | -0.545818 | -3.022511 |
| 8 | -2.108869 | -1.004845 | -2.078931 |
| 8 | -0.257365 | -2.271370 | -2.070909 |
| 6 | -0.233504 | -0.095649 | -0.967741 |
| 6 | 1.044982  | 0.508787  | -1.626901 |
| 1 | 1.218006  | 0.265843  | -2.676679 |
| 1 | 1.078334  | 1.593388  | -1.508398 |
| 6 | 1.932185  | -0.210153 | -0.553765 |
| 6 | 0.630020  | -0.471234 | 0.257386  |
| 1 | 0.532344  | 0.288405  | 1.036676  |
| 1 | 0.453939  | -1.441938 | 0.706814  |
| 6 | -0.928862 | -1.183382 | -1.743491 |
| 6 | 3.006230  | 0.594977  | 0.141438  |
| 6 | 3.678432  | 1.631504  | -0.518822 |
| 1 | 3.402081  | 1.894768  | -1.535699 |
| 6 | 4.681353  | 2.353650  | 0.129109  |
| 1 | 5.178943  | 3.168554  | -0.387997 |
| 6 | 5.030519  | 2.042298  | 1.444979  |
| 1 | 5.803991  | 2.609996  | 1.952656  |
| 6 | 4.366906  | 1.009553  | 2.110557  |
| 1 | 4.621448  | 0.771617  | 3.138859  |
| 6 | 3.361516  | 0.290918  | 1.461712  |
| 1 | 2.839258  | -0.501030 | 1.990919  |
| 6 | -1.040077 | -3.355483 | -2.655777 |
| 1 | -1.493039 | -3.024420 | -3.590874 |
| 1 | -0.327756 | -4.160728 | -2.825157 |
| 1 | -1.809045 | -3.646863 | -1.939355 |
| 1 | 4.383368  | -0.205390 | -3.423486 |

# P

Number of imaginary frequencies : 0 Electronic energy : HF=-1076.1029462  
Zero-point correction= 0.367965 (Hartree/Particle)  
Thermal correction to Energy= 0.389143  
Thermal correction to Enthalpy= 0.390087  
Thermal correction to Gibbs Free Energy= 0.316376  
Sum of electronic and zero-point Energies= -1075.734981  
Sum of electronic and thermal Energies= -1075.713803  
Sum of electronic and thermal Enthalpies= -1075.712859  
Sum of electronic and thermal Free Energies= -1075.786570

## Cartesian Coordinates

|   |           |           |          |
|---|-----------|-----------|----------|
| 6 | -0.949168 | -0.433031 | 0.612321 |
| 6 | -1.213005 | -0.765436 | 1.934352 |
| 6 | -2.360484 | -1.510871 | 2.306582 |
| 1 | -2.502753 | -1.770937 | 3.353952 |
| 6 | -3.273951 | -1.900997 | 1.363041 |
| 1 | -4.144753 | -2.484420 | 1.648970 |

|   |           |           |           |
|---|-----------|-----------|-----------|
| 6 | -3.105604 | -1.523781 | 0.006704  |
| 6 | -1.947479 | -0.760310 | -0.367466 |
| 6 | -1.861639 | -0.334843 | -1.724518 |
| 1 | -1.046428 | 0.304602  | -2.031162 |
| 6 | -2.823792 | -0.676333 | -2.649591 |
| 6 | -3.936434 | -1.466867 | -2.280857 |
| 1 | -4.683578 | -1.735346 | -3.021721 |
| 6 | -4.072001 | -1.872391 | -0.973454 |
| 1 | -4.932254 | -2.461283 | -0.664610 |
| 6 | 0.351594  | 0.257704  | 0.204030  |
| 6 | 1.146518  | -0.424713 | -0.963678 |
| 1 | 0.942231  | -1.497766 | -0.966038 |
| 1 | 1.052321  | -0.047790 | -1.983303 |
| 6 | 2.472773  | -0.140264 | -0.220165 |
| 1 | 2.919239  | 0.810521  | -0.516007 |
| 6 | 1.631796  | -0.023993 | 1.076458  |
| 1 | 1.912332  | 0.737363  | 1.805147  |
| 1 | 1.570744  | -0.997541 | 1.563060  |
| 6 | 0.143129  | 1.769263  | 0.049524  |
| 6 | 0.460229  | 2.481734  | -1.112361 |
| 1 | 0.869099  | 1.967600  | -1.975555 |
| 6 | 0.260610  | 3.863920  | -1.189047 |
| 1 | 0.512320  | 4.390893  | -2.105341 |
| 6 | -0.256895 | 4.560920  | -0.099778 |
| 1 | -0.413613 | 5.634166  | -0.158317 |
| 6 | -0.569974 | 3.863341  | 1.070664  |
| 1 | -0.970418 | 4.394564  | 1.929916  |
| 6 | -0.371921 | 2.486894  | 1.143177  |
| 1 | -0.608826 | 1.954965  | 2.059034  |
| 6 | 3.492857  | -1.246056 | -0.242794 |
| 6 | 5.750638  | -1.806225 | -0.606171 |
| 1 | 6.667998  | -1.287541 | -0.885383 |
| 1 | 5.858190  | -2.277749 | 0.374624  |
| 1 | 5.507752  | -2.580741 | -1.338958 |
| 8 | -0.347533 | -0.341614 | 2.914930  |
| 8 | 3.251491  | -2.409519 | 0.009899  |
| 8 | 4.725555  | -0.798874 | -0.574636 |
| 1 | -0.622225 | -0.715144 | 3.761458  |
| 1 | -2.730265 | -0.324347 | -3.673151 |

---

**TS(A-G)**

---

Number of imaginary frequencies : 1 Electronic energy : HF=-3003.7316373  
Zero-point correction= 0.409701 (Hartree/Particle)  
Thermal correction to Energy= 0.450086  
Thermal correction to Enthalpy= 0.451030  
Thermal correction to Gibbs Free Energy= 0.330079  
Sum of electronic and zero-point Energies= -3003.321937  
Sum of electronic and thermal Energies= -3003.281552  
Sum of electronic and thermal Enthalpies= -3003.280607  
Sum of electronic and thermal Free Energies= -3003.401558

---

Cartesian Coordinates

---

|    |          |           |           |
|----|----------|-----------|-----------|
| 83 | 0.935244 | -0.824507 | 0.983567  |
| 8  | 2.785102 | 0.144898  | 1.302418  |
| 8  | 1.150935 | -0.755813 | -1.151081 |
| 16 | 3.298681 | 1.543606  | 0.734470  |
| 16 | 1.767486 | -2.110335 | -1.669800 |
| 8  | 3.231223 | 1.558985  | -0.724966 |

|   |           |           |           |
|---|-----------|-----------|-----------|
| 8 | 2.772287  | 2.651091  | 1.518538  |
| 6 | 5.094229  | 1.334247  | 1.204898  |
| 9 | 5.606936  | 0.259576  | 0.607896  |
| 9 | 5.752210  | 2.423337  | 0.806497  |
| 9 | 5.199283  | 1.205597  | 2.526672  |
| 8 | 1.094250  | -2.626369 | -2.844161 |
| 8 | 1.933768  | -2.938474 | -0.447303 |
| 6 | 3.478417  | -1.560272 | -2.190238 |
| 9 | 4.065768  | -2.577869 | -2.817256 |
| 9 | 3.378949  | -0.518296 | -3.003806 |
| 9 | 4.178941  | -1.237436 | -1.105408 |
| 6 | -0.724077 | 1.663259  | -0.045413 |
| 6 | -2.144387 | 1.879356  | 0.208348  |
| 6 | -2.789003 | 2.889123  | -0.663521 |
| 6 | -2.114414 | 3.379759  | -1.817355 |
| 6 | -0.764728 | 2.983665  | -2.058622 |
| 6 | -0.081013 | 2.153332  | -1.188712 |
| 1 | -4.593546 | 2.970984  | 0.506870  |
| 1 | -2.328902 | 2.082183  | 1.264624  |
| 6 | -4.087017 | 3.344312  | -0.379630 |
| 6 | -2.792376 | 4.282396  | -2.674305 |
| 1 | -0.256032 | 3.371644  | -2.936276 |
| 1 | 0.958944  | 1.900110  | -1.359079 |
| 6 | -4.076689 | 4.704391  | -2.385203 |
| 6 | -4.726019 | 4.240242  | -1.224752 |
| 1 | -2.280018 | 4.648006  | -3.560308 |
| 1 | -4.583705 | 5.398873  | -3.048206 |
| 1 | -5.730865 | 4.580992  | -0.993806 |
| 8 | -0.077969 | 0.944534  | 0.890294  |
| 8 | -3.493588 | -3.449249 | -0.683800 |
| 8 | -5.395700 | -2.326453 | -1.264100 |
| 6 | -3.395318 | -1.142283 | -1.198531 |
| 6 | -2.094761 | -0.786919 | -0.588969 |
| 1 | -1.652594 | -1.568331 | 0.049688  |
| 1 | -1.340676 | -0.354342 | -1.263436 |
| 6 | -2.962583 | 0.325613  | 0.083432  |
| 6 | -3.953334 | 0.232025  | -1.121729 |
| 1 | -3.621545 | 0.914154  | -1.916798 |
| 1 | -5.022714 | 0.371828  | -0.958243 |
| 6 | -4.046774 | -2.408145 | -1.024244 |
| 6 | -3.526980 | -0.085943 | 1.439211  |
| 6 | -2.703041 | -0.045470 | 2.577349  |
| 1 | -1.687172 | 0.323224  | 2.485841  |
| 6 | -3.175960 | -0.435353 | 3.831037  |
| 1 | -2.516783 | -0.384311 | 4.693280  |
| 6 | -4.489370 | -0.881129 | 3.977407  |
| 1 | -4.861257 | -1.186634 | 4.950863  |
| 6 | -5.319067 | -0.929850 | 2.856791  |
| 1 | -6.341777 | -1.283569 | 2.951336  |
| 6 | -4.846218 | -0.533642 | 1.604833  |
| 1 | -5.506774 | -0.618401 | 0.750303  |
| 6 | -6.105910 | -3.554272 | -1.072791 |
| 1 | -6.016753 | -3.899294 | -0.037707 |
| 1 | -7.147720 | -3.337591 | -1.313745 |
| 1 | -5.716906 | -4.337814 | -1.729808 |

---

**TS(B-C)**

---

Number of imaginary frequencies : 1 Electronic energy : HF=-3003.8188557  
Zero-point correction= 0.411189 (Hartree/Particle)

|                                              |              |
|----------------------------------------------|--------------|
| Thermal correction to Energy=                | 0.451449     |
| Thermal correction to Enthalpy=              | 0.452393     |
| Thermal correction to Gibbs Free Energy=     | 0.333978     |
| Sum of electronic and zero-point Energies=   | -3003.407666 |
| Sum of electronic and thermal Energies=      | -3003.367406 |
| Sum of electronic and thermal Enthalpies=    | -3003.366462 |
| Sum of electronic and thermal Free Energies= | -3003.484878 |

.....  
Cartesian Coordinates  
.....

|    |           |           |           |
|----|-----------|-----------|-----------|
| 83 | 1.582717  | 1.097251  | -0.263532 |
| 8  | 2.369264  | -0.994575 | -0.976901 |
| 8  | 0.024598  | 5.267851  | 0.907398  |
| 16 | 2.591418  | -2.350279 | -0.303253 |
| 16 | 0.130229  | 4.182839  | -0.062049 |
| 8  | 2.656452  | -2.244455 | 1.165420  |
| 8  | 1.743197  | -3.401684 | -0.876970 |
| 6  | 4.328540  | -2.718234 | -0.851967 |
| 9  | 5.148474  | -1.745971 | -0.437036 |
| 9  | 4.725540  | -3.880647 | -0.324323 |
| 9  | 4.384522  | -2.799327 | -2.184320 |
| 8  | 0.388062  | 2.825859  | 0.626739  |
| 8  | 0.958947  | 4.333382  | -1.263070 |
| 6  | -1.616693 | 3.933487  | -0.688437 |
| 9  | -1.637005 | 3.205078  | -1.805631 |
| 9  | -2.363963 | 3.288773  | 0.242772  |
| 9  | -2.181959 | 5.117246  | -0.928644 |
| 6  | -0.924161 | -0.146254 | -1.656308 |
| 6  | -2.238554 | -0.016446 | -1.152451 |
| 6  | -3.221072 | -1.014006 | -1.429277 |
| 6  | -2.815582 | -2.243068 | -2.033991 |
| 6  | -1.442018 | -2.393492 | -2.420196 |
| 6  | -0.532712 | -1.383135 | -2.264243 |
| 1  | -4.891780 | 0.087853  | -0.619571 |
| 1  | -2.540794 | 0.949653  | -0.764923 |
| 6  | -4.577416 | -0.847443 | -1.072518 |
| 6  | -3.772720 | -3.255574 | -2.258515 |
| 1  | -1.125170 | -3.333775 | -2.863704 |
| 1  | 0.500456  | -1.500698 | -2.564786 |
| 6  | -5.096867 | -3.069371 | -1.895601 |
| 6  | -5.497374 | -1.858011 | -1.300680 |
| 1  | -3.455387 | -4.185068 | -2.724032 |
| 1  | -5.826751 | -3.853001 | -2.074166 |
| 1  | -6.536013 | -1.714844 | -1.017571 |
| 8  | -0.078106 | 0.857820  | -1.577322 |
| 8  | 2.517274  | 0.703000  | 2.193177  |
| 8  | 1.332682  | -0.749301 | 3.450400  |
| 6  | 0.436434  | -0.047414 | 1.340575  |
| 6  | -0.959933 | 0.540679  | 1.743715  |
| 1  | -1.079605 | 0.676232  | 2.828404  |
| 1  | -1.263574 | 1.470323  | 1.262659  |
| 6  | -1.591597 | -0.749510 | 1.302028  |
| 6  | -0.263874 | -1.421571 | 1.098007  |
| 1  | -0.087546 | -1.963436 | 0.168376  |
| 1  | -0.060254 | -2.125216 | 1.916630  |
| 6  | 1.523858  | -0.002552 | 2.372552  |
| 6  | -2.858361 | -1.310023 | 1.613963  |
| 6  | -3.885510 | -0.508464 | 2.166784  |
| 1  | -3.710590 | 0.553602  | 2.311557  |
| 6  | -5.094953 | -1.081339 | 2.536910  |

|   |           |           |          |
|---|-----------|-----------|----------|
| 1 | -5.874784 | -0.468460 | 2.977536 |
| 6 | -5.306523 | -2.451387 | 2.338774 |
| 1 | -6.253370 | -2.896735 | 2.629450 |
| 6 | -4.314618 | -3.249196 | 1.755466 |
| 1 | -4.495839 | -4.305326 | 1.585792 |
| 6 | -3.097926 | -2.687695 | 1.395309 |
| 1 | -2.321378 | -3.295697 | 0.943145 |
| 6 | 2.472995  | -0.881285 | 4.332630 |
| 1 | 2.780464  | 0.097661  | 4.705624 |
| 1 | 2.137790  | -1.522853 | 5.146432 |
| 1 | 3.292608  | -1.344777 | 3.779682 |

---

**TS(C-D)**

---

Number of imaginary frequencies : 1 Electronic energy : HF=-3003.7382187  
Zero-point correction= 0.407880 (Hartree/Particle)  
Thermal correction to Energy= 0.447944  
Thermal correction to Enthalpy= 0.448888  
Thermal correction to Gibbs Free Energy= 0.328882  
Sum of electronic and zero-point Energies= -3003.330338  
Sum of electronic and thermal Energies= -3003.290275  
Sum of electronic and thermal Enthalpies= -3003.289331  
Sum of electronic and thermal Free Energies= -3003.409337

---

Cartesian Coordinates

---

|    |           |           |           |
|----|-----------|-----------|-----------|
| 83 | 1.748445  | 0.701075  | -0.124272 |
| 8  | 1.827502  | -1.459039 | -1.003788 |
| 8  | 1.449714  | 5.155092  | 0.172551  |
| 16 | 2.191510  | -2.720988 | -0.202587 |
| 16 | 0.953620  | 3.954639  | -0.488518 |
| 8  | 2.332311  | -2.416931 | 1.232650  |
| 8  | 1.402542  | -3.881178 | -0.612683 |
| 6  | 3.925259  | -2.999209 | -0.811569 |
| 9  | 4.651725  | -1.892826 | -0.583064 |
| 9  | 4.479564  | -4.025891 | -0.164087 |
| 9  | 3.922998  | -3.252713 | -2.122588 |
| 8  | 0.923801  | 2.728991  | 0.455727  |
| 8  | 1.459704  | 3.572331  | -1.813203 |
| 6  | -0.878721 | 4.235014  | -0.693720 |
| 9  | -1.440395 | 3.231037  | -1.395910 |
| 9  | -1.475879 | 4.284332  | 0.505946  |
| 9  | -1.096059 | 5.378325  | -1.340956 |
| 6  | -0.944753 | -0.420304 | -1.591897 |
| 6  | -2.114077 | -0.284417 | -0.772938 |
| 6  | -3.313831 | -0.893467 | -1.361437 |
| 6  | -3.143168 | -1.838382 | -2.428495 |
| 6  | -1.842879 | -2.102892 | -2.960203 |
| 6  | -0.734802 | -1.372281 | -2.591633 |
| 1  | -4.797007 | 0.137902  | -0.180611 |
| 1  | -1.369935 | 0.991250  | -0.935188 |
| 6  | -4.630801 | -0.601788 | -0.951397 |
| 6  | -4.272759 | -2.487503 | -2.986654 |
| 1  | -1.752824 | -2.844880 | -3.749224 |
| 1  | 0.229711  | -1.465307 | -3.072944 |
| 6  | -5.545814 | -2.196719 | -2.542142 |
| 6  | -5.719211 | -1.232761 | -1.530991 |
| 1  | -4.119102 | -3.204376 | -3.788719 |
| 1  | -6.407498 | -2.690019 | -2.980504 |
| 1  | -6.720530 | -0.972212 | -1.201192 |

|   |           |           |           |
|---|-----------|-----------|-----------|
| 8 | -0.178787 | 0.683669  | -1.379387 |
| 8 | 2.348000  | 0.463408  | 2.324347  |
| 8 | 0.881976  | -0.644209 | 3.630072  |
| 6 | 0.251143  | -0.066582 | 1.382459  |
| 6 | -1.054498 | 0.770728  | 1.502710  |
| 1 | -1.344471 | 0.865716  | 2.553105  |
| 1 | -1.067830 | 1.764346  | 1.055964  |
| 6 | -1.861819 | -0.387162 | 0.827184  |
| 6 | -0.626997 | -1.314736 | 1.126316  |
| 1 | -0.330872 | -2.010545 | 0.343026  |
| 1 | -0.761120 | -1.876894 | 2.054525  |
| 6 | 1.238890  | -0.065922 | 2.502349  |
| 6 | -3.123427 | -0.768674 | 1.571333  |
| 6 | -3.907077 | 0.199526  | 2.212466  |
| 1 | -3.614694 | 1.245129  | 2.169891  |
| 6 | -5.072776 | -0.161343 | 2.890497  |
| 1 | -5.670157 | 0.602749  | 3.379443  |
| 6 | -5.466254 | -1.499807 | 2.943147  |
| 1 | -6.370916 | -1.782499 | 3.473312  |
| 6 | -4.686485 | -2.473917 | 2.315145  |
| 1 | -4.983126 | -3.517975 | 2.353135  |
| 6 | -3.526019 | -2.109067 | 1.634656  |
| 1 | -2.932508 | -2.869068 | 1.134068  |
| 6 | 1.912688  | -0.764408 | 4.642079  |
| 1 | 2.261281  | 0.225338  | 4.943482  |
| 1 | 1.440293  | -1.283865 | 5.474202  |
| 1 | 2.745713  | -1.343482 | 4.238479  |

---

**TS(E-F)**

---

Number of imaginary frequencies : 1    Electronic energy :        HF=-3464.8831845  
Zero-point correction=                    0.561352 (Hartree/Particle)  
Thermal correction to Energy=            0.611183  
Thermal correction to Enthalpy=         0.612127  
Thermal correction to Gibbs Free Energy= 0.468752  
Sum of electronic and zero-point Energies= -3464.321833  
Sum of electronic and thermal Energies= -3464.272001  
Sum of electronic and thermal Enthalpies= -3464.271057  
Sum of electronic and thermal Free Energies= -3464.414432

---

Cartesian Coordinates

---

|    |           |           |           |
|----|-----------|-----------|-----------|
| 83 | -1.465567 | -0.098629 | -0.624354 |
| 8  | 1.145542  | -0.980093 | -0.569456 |
| 8  | -1.570629 | -1.546221 | 1.149692  |
| 16 | 0.718612  | -2.128090 | -1.404516 |
| 16 | -1.100178 | -0.856214 | 2.447025  |
| 8  | -0.814378 | -1.900291 | -1.644194 |
| 8  | 1.424387  | -2.468096 | -2.628841 |
| 6  | 0.803941  | -3.665928 | -0.329662 |
| 9  | 0.555770  | -3.366864 | 0.937805  |
| 9  | -0.080203 | -4.554957 | -0.774798 |
| 9  | 2.037096  | -4.158611 | -0.438983 |
| 8  | -1.180647 | 0.606526  | 2.274649  |
| 8  | 0.137515  | -1.421957 | 2.998674  |
| 6  | -2.440419 | -1.353909 | 3.640651  |
| 9  | -2.170662 | -0.828446 | 4.833926  |
| 9  | -3.620928 | -0.889598 | 3.210525  |
| 9  | -2.492845 | -2.680275 | 3.731488  |
| 6  | 3.150065  | -0.204608 | 1.261329  |

|   |           |           |           |
|---|-----------|-----------|-----------|
| 6 | 3.841226  | 0.579409  | 0.340011  |
| 6 | 5.002688  | -0.005906 | -0.276590 |
| 6 | 5.272825  | -1.409045 | -0.120675 |
| 6 | 4.432384  | -2.185519 | 0.718743  |
| 6 | 3.425055  | -1.588458 | 1.424536  |
| 1 | 5.848456  | 1.821734  | -1.090263 |
| 1 | 1.641815  | -0.339076 | 2.473492  |
| 6 | 5.950287  | 0.747513  | -1.029251 |
| 6 | 6.385908  | -1.996280 | -0.775931 |
| 1 | 4.615664  | -3.251993 | 0.815588  |
| 1 | 2.787486  | -2.164459 | 2.089358  |
| 6 | 7.251681  | -1.239080 | -1.531545 |
| 6 | 7.036698  | 0.153113  | -1.635199 |
| 1 | 6.551086  | -3.063934 | -0.652801 |
| 1 | 8.104204  | -1.698857 | -2.022399 |
| 1 | 7.742611  | 0.767562  | -2.187311 |
| 8 | 2.159323  | 0.348153  | 2.017659  |
| 8 | -0.161636 | 1.361805  | -2.233143 |
| 8 | 1.674220  | 0.485995  | -3.353631 |
| 6 | 1.876045  | 2.105991  | -1.587483 |
| 6 | 1.808802  | 2.177016  | -0.048907 |
| 1 | 1.528251  | 3.169200  | 0.314426  |
| 1 | 1.208579  | 1.429611  | 0.459144  |
| 6 | 3.385558  | 2.012125  | -0.002463 |
| 6 | 3.374685  | 2.313857  | -1.563114 |
| 1 | 3.936445  | 1.639633  | -2.209137 |
| 1 | 3.660124  | 3.345827  | -1.784298 |
| 6 | 1.183720  | 1.215508  | -2.390030 |
| 6 | 4.081235  | 3.037976  | 0.891289  |
| 6 | 3.736600  | 3.096857  | 2.252593  |
| 1 | 2.988151  | 2.412091  | 2.636481  |
| 6 | 4.349938  | 4.011668  | 3.106076  |
| 1 | 4.065840  | 4.039727  | 4.154542  |
| 6 | 5.325386  | 4.887523  | 2.621715  |
| 1 | 5.804531  | 5.599152  | 3.288010  |
| 6 | 5.676375  | 4.838497  | 1.273931  |
| 1 | 6.432591  | 5.512654  | 0.881103  |
| 6 | 5.055981  | 3.924184  | 0.417820  |
| 1 | 5.344660  | 3.914208  | -0.628575 |
| 6 | 0.797603  | 0.033306  | -4.420310 |
| 1 | 1.459857  | -0.195302 | -5.253877 |
| 1 | 0.275149  | -0.868433 | -4.104567 |
| 1 | 0.089023  | 0.821804  | -4.680793 |
| 6 | -4.360677 | 0.078311  | -1.052173 |
| 6 | -5.101340 | 0.923948  | -1.853882 |
| 6 | -6.266769 | 1.556525  | -1.349824 |
| 6 | -6.660566 | 1.324214  | 0.010832  |
| 6 | -5.875792 | 0.447483  | 0.805363  |
| 6 | -4.759654 | -0.170179 | 0.290851  |
| 1 | -6.759179 | 2.607244  | -3.178576 |
| 1 | -4.782328 | 1.098648  | -2.876978 |
| 6 | -7.055018 | 2.430953  | -2.147666 |
| 6 | -7.819496 | 1.972940  | 0.514850  |
| 1 | -6.169372 | 0.260287  | 1.834929  |
| 1 | -4.187544 | -0.869950 | 0.890216  |
| 6 | -8.560617 | 2.814101  | -0.283980 |
| 6 | -8.172887 | 3.043671  | -1.628106 |
| 1 | -8.111936 | 1.791885  | 1.546071  |
| 1 | -9.445088 | 3.304447  | 0.111637  |
| 1 | -8.765523 | 3.708288  | -2.250193 |

|   |           |           |           |
|---|-----------|-----------|-----------|
| 8 | -3.236405 | -0.540778 | -1.552398 |
| 1 | 0.422420  | 2.444841  | -1.868540 |

---

**TS(K'-M)**

---

Number of imaginary frequencies : 1 Electronic energy : HF=-3004.193019  
Zero-point correction= 0.425235 (Hartree/Particle)  
Thermal correction to Energy= 0.465519  
Thermal correction to Enthalpy= 0.466463  
Thermal correction to Gibbs Free Energy= 0.348544  
Sum of electronic and zero-point Energies= -3003.767784  
Sum of electronic and thermal Energies= -3003.727500  
Sum of electronic and thermal Enthalpies= -3003.726556  
Sum of electronic and thermal Free Energies= -3003.844475

---

Cartesian Coordinates

---

|    |           |           |           |
|----|-----------|-----------|-----------|
| 83 | -2.049736 | 1.104904  | -0.994833 |
| 8  | -3.228796 | 0.134963  | 0.470528  |
| 8  | -0.887837 | 4.725924  | 0.286820  |
| 16 | -2.989507 | -1.068545 | 1.457941  |
| 16 | -0.371075 | 3.370719  | 0.250610  |
| 8  | -1.832477 | -1.869583 | 1.026587  |
| 8  | -3.111853 | -0.655183 | 2.842868  |
| 6  | -4.486876 | -2.085354 | 1.006686  |
| 9  | -4.392459 | -2.440821 | -0.282549 |
| 9  | -4.494400 | -3.178217 | 1.766075  |
| 9  | -5.595840 | -1.385214 | 1.197866  |
| 8  | 0.166957  | 2.833421  | -1.032306 |
| 8  | -1.353819 | 2.282181  | 0.766144  |
| 6  | 1.019535  | 3.298913  | 1.512832  |
| 9  | 0.778962  | 4.164675  | 2.482574  |
| 9  | 1.115832  | 2.066575  | 2.031474  |
| 9  | 2.159929  | 3.602827  | 0.893113  |
| 6  | 3.656631  | -1.802539 | -1.965712 |
| 6  | 2.616472  | -2.234796 | -1.102744 |
| 6  | 2.970285  | -2.778974 | 0.188759  |
| 6  | 4.291857  | -2.574319 | 0.682564  |
| 6  | 5.249897  | -1.956931 | -0.175321 |
| 6  | 4.962295  | -1.608420 | -1.478404 |
| 1  | 1.038124  | -3.650229 | 0.611896  |
| 1  | 1.691549  | -2.568129 | -1.559030 |
| 6  | 2.034112  | -3.452117 | 0.995984  |
| 6  | 4.630455  | -3.015047 | 1.983131  |
| 1  | 6.252898  | -1.787847 | 0.206897  |
| 1  | 5.727563  | -1.181242 | -2.119381 |
| 6  | 3.687074  | -3.650926 | 2.770081  |
| 6  | 2.389613  | -3.876803 | 2.269934  |
| 1  | 5.638958  | -2.852953 | 2.352596  |
| 1  | 3.947187  | -3.989138 | 3.767538  |
| 1  | 1.660291  | -4.394950 | 2.884520  |
| 8  | 3.304084  | -1.498119 | -3.222144 |
| 8  | -2.224239 | -1.215676 | -2.042414 |
| 8  | -0.625872 | -2.702662 | -1.479932 |
| 6  | -0.295664 | -0.353899 | -1.009595 |
| 6  | 0.955520  | 0.021785  | -1.883516 |
| 1  | 1.120154  | -0.600444 | -2.765484 |
| 1  | 1.000973  | 1.070497  | -2.182343 |
| 6  | 1.838494  | -0.257814 | -0.666706 |
| 6  | 0.629541  | -0.579629 | 0.203996  |

|   |           |           |           |
|---|-----------|-----------|-----------|
| 1 | 0.501390  | 0.155525  | 1.000653  |
| 1 | 0.551913  | -1.563862 | 0.660225  |
| 6 | -1.123929 | -1.483848 | -1.540264 |
| 6 | 2.956380  | 0.562445  | -0.240291 |
| 6 | 3.596933  | 1.441534  | -1.139070 |
| 1 | 3.246100  | 1.514046  | -2.163624 |
| 6 | 4.648507  | 2.240701  | -0.710414 |
| 1 | 5.117750  | 2.935345  | -1.399688 |
| 6 | 5.091507  | 2.163909  | 0.616651  |
| 1 | 5.907769  | 2.796926  | 0.950655  |
| 6 | 4.479615  | 1.284972  | 1.512850  |
| 1 | 4.819776  | 1.230002  | 2.541943  |
| 6 | 3.418907  | 0.488374  | 1.089780  |
| 1 | 2.933550  | -0.185889 | 1.787508  |
| 6 | -1.534294 | -3.783747 | -1.848157 |
| 1 | -1.810173 | -3.694389 | -2.899782 |
| 1 | -0.976823 | -4.699747 | -1.663545 |
| 1 | -2.422417 | -3.722795 | -1.218570 |
| 1 | 4.056305  | -1.147967 | -3.723192 |

## 9. Synthesis and Characterization of Carbofunctionalized Cyclobutanes

### Methyl-3-(2-hydroxynaphthalen-1-yl)-3-phenylcyclobutane-1-carboxylate (**3a**)

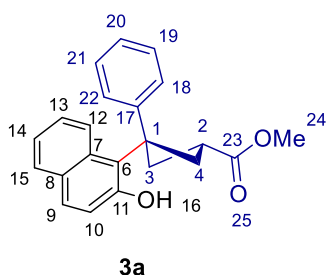

Following the general procedure, treatment of naphthalen-2-ol **1a** (0.029 g, 0.2 mmol) and methyl 3-phenylbicyclo[1.1.0]butane-1-carboxylate **2a** (0.045 g, 0.24 mmol) with Bi(OTf)<sub>3</sub> (0.013 g, 0.02 mmol) in CH<sub>2</sub>Cl<sub>2</sub> (1.5 mL) at 25 °C for 12 h followed by flash column chromatography (Pet. ether/ EtOAc = 80/20) of the crude reaction mixture using silica gel afforded methyl-3-(2-hydroxynaphthalen-1-yl)-3-phenylcyclobutane-1-carboxylate **3a** as yellow solid (0.060 g, 91% yield).

**R<sub>f</sub>** (Pet. ether /EtOAc = 90/10): 0.22; Melting point: 143-145 °C. **<sup>1</sup>H NMR (400 MHz, CDCl<sub>3</sub>)** δ 7.71-7.65 (m, 4H, **12-15**), 7.44 (d, *J* = 8.9 Hz, 1H, **9**), 7.36-7.18 (m, 5H, **18-22**), 6.94 (d, *J* = 8.8 Hz, 1H, **10**), 6.20 (s, 1H, **16**), 3.68 (s, 3H, **24**), 3.43-3.29 (m, 5H, **2-4**). **<sup>13</sup>C NMR (100 MHz, CDCl<sub>3</sub>)** δ 176.8 (**23**), 150.8 (**11**), 146.6 (**17**), 132.3 (**7**), 129.8 (**8**), 128.9 (**13**), 128.8 (**14**), 128.6 (**19,21**), 126.6 (**6**), 126.4 (**9**), 126.3 (**15**), 125.9 (**18,22**), 124.5 (**20**), 122.7 (**12**), 118.8 (**10**), 52.1 (**24**), 46.1 (**1**), 40.6 (**3,4**), 34.5 (**2**). **HRMS (ESI)** *m/z*: [M+Na]<sup>+</sup> calcd for C<sub>22</sub>H<sub>20</sub>NaO<sub>3</sub> 355.1305; found 355.1308. **FTIR (cm<sup>-1</sup>)** 3351, 2947, 1691, 1615, 1432, 1259.

### Methyl-3-(2-hydroxynaphthalen-1-yl)-3-(*p*-tolyl)cyclobutane-1-carboxylate (**3b**)

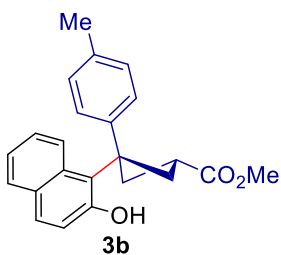

Following the general procedure, treatment of naphthalen-2-ol **1a** (0.029 g, 0.2 mmol) and methyl 3-(*p*-tolyl)bicyclo[1.1.0]butane-1-carboxylate **2b** (0.048 g, 0.24 mmol) with Bi(OTf)<sub>3</sub> (0.013 g, 0.02 mmol) in CH<sub>2</sub>Cl<sub>2</sub> (1.5 mL) at 25 °C for 12 h followed by flash column chromatography (Pet. ether/ EtOAc = 80/20) of the crude reaction mixture using silica gel afforded methyl-3-(2-hydroxynaphthalen-1-yl)-3-(*p*-tolyl)cyclobutane-1-carboxylate **3b** as yellow solid (0.055 g, 79% yield).

**R<sub>f</sub>** (Pet. ether /EtOAc = 90/10): 0.23; Melting point: 177-179 °C. **<sup>1</sup>H NMR (400 MHz, CDCl<sub>3</sub>)** δ 7.72-7.64 (m, 2H), 7.54-7.49 (m, 3H), 7.36-7.24 (m, 2H), 7.11 (d, *J* = 7.9 Hz, 2H), 6.95 (d, *J* = 8.6 Hz, 1H), 5.75 (s, 1H), 3.66 (s, 3H), 3.44-3.25 (m, 5H), 2.29 (s, 3H). **<sup>13</sup>C NMR (100 MHz, CDCl<sub>3</sub>)** δ 176.3, 150.6, 143.6, 136.0, 132.3, 129.9, 129.4, 128.9, 128.8, 126.9, 126.3, 125.9, 124.7, 122.8, 118.9, 52.0, 45.8, 40.8, 34.5, 21.0. **HRMS (ESI)** *m/z*: [M+Na]<sup>+</sup> calcd for C<sub>23</sub>H<sub>22</sub>NaO<sub>3</sub> 369.1461; found 369.1463. **FTIR (cm<sup>-1</sup>)** 3370, 2935, 1699, 1511, 1437, 1194.

### Methyl-3-(4-bromophenyl)-3-(2-hydroxynaphthalen-1-yl)cyclobutane-1-carboxylate (**3c**)

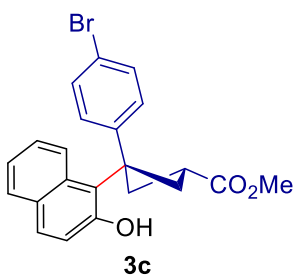

Following the general procedure, treatment of naphthalen-2-ol **1a** (0.029 g, 0.2 mmol) and methyl 3-(4-bromophenyl)bicyclo [1.1.0]butane-1-carboxylate **2c** (0.064 g, 0.24 mmol) with Bi(OTf)<sub>3</sub> (0.013 g, 0.02 mmol) in CH<sub>2</sub>Cl<sub>2</sub> (1.5 mL) at 25 °C for 12 h followed by flash column chromatography (Pet. ether/ EtOAc = 80/20) of the crude reaction mixture using silica gel afforded methyl-3-(4-bromophenyl)-3-(2-hydroxynaphthalen-1-yl)cyclobutane-1-carboxylate **3c** as light yellow solid (0.076 g, 78% yield).

**R<sub>f</sub>** (Pet. ether /EtOAc = 90/10): 0.23; Melting point: 211-213 °C. **<sup>1</sup>H NMR (400 MHz, CDCl<sub>3</sub>)** δ 7.68-7.50 (m, 4H), 7.42-7.22 (m, 5H), 6.89 (d, *J* = 8.8 Hz, 1H), 6.15 (s, 1H), 3.66 (s, 3H), 3.40-3.24 (m, 5H). **<sup>13</sup>C NMR (100 MHz, CDCl<sub>3</sub>)** δ 176.5, 150.6, 145.8, 132.1, 131.6, 129.8, 129.0, 128.7, 128.4, 126.4, 126.0, 124.2, 122.93, 120.2, 118.8, 52.1, 45.9, 40.6, 34.4. **HRMS (ESI)** *m/z*: [M+Na]<sup>+</sup> calcd for C<sub>22</sub>H<sub>19</sub>BrNaO<sub>3</sub> 433.0415; found 433.0410. **FTIR (cm<sup>-1</sup>)** 3368, 2946, 1700, 1494, 1435, 1259.

### Methyl-3-(4-chlorophenyl)-3-(2-hydroxynaphthalen-1-yl)cyclobutane-1-carboxylate (**3d**)

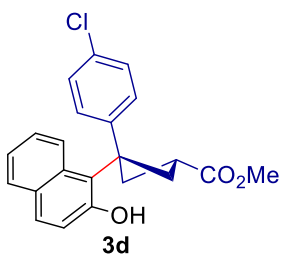

Following the general procedure, treatment of naphthalen-2-ol **1a** (0.029 g, 0.2 mmol) and methyl 3-(4-chlorophenyl)bicyclo [1.1.0]butane-1-carboxylate **2d** (0.053 g, 0.24 mmol) with Bi(OTf)<sub>3</sub> (0.013 g, 0.02 mmol) in CH<sub>2</sub>Cl<sub>2</sub> (1.5 mL) at 25 °C for 12 h followed by flash column chromatography (Pet. ether/ EtOAc = 80/20) of the crude reaction mixture using silica gel afforded methyl-3-(4-chlorophenyl)-3-(2-hydroxynaphthalen-1-yl)cyclobutane-1-carboxylate **3d** as yellow solid (0.061 g, 83% yield).

**R<sub>f</sub>** (Pet. ether /EtOAc = 90/10): 0.23; Melting point: 203-205 °C. **<sup>1</sup>H NMR (400 MHz, CDCl<sub>3</sub>)** δ 7.68 (d, *J* = 8.1 Hz, 1H), 7.60-7.58 (m, 3H), 7.40-7.22 (m, 5H), 6.92 (d, *J* = 8.7 Hz, 1H), 6.55-6.45 (m, 1H), 3.69 (s, 3H), 3.55-3.07 (m, 5H). **<sup>13</sup>C NMR (100 MHz, CDCl<sub>3</sub>)** δ 176.8, 150.8, 145.3, 132.1, 132.0, 129.8, 129.0, 129.0, 128.7, 128.0, 126.0, 124.2, 122.8, 118.8, 52.2, 45.9, 40.6, 34.5. **HRMS (ESI)** *m/z*: [M+Na]<sup>+</sup> calcd for C<sub>22</sub>H<sub>19</sub>ClNaO<sub>3</sub> 389.0915; found 389.0918. **FTIR (cm<sup>-1</sup>)** 3355, 2948, 1698, 1498, 1344, 1211.

### Methyl-3-(4-fluorophenyl)-3-(2-hydroxynaphthalen-1-yl)cyclobutane-1-carboxylate (**3e**)

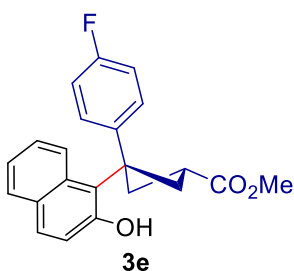

Following the general procedure, treatment of naphthalen-2-ol **1a** (0.029 g, 0.2 mmol) and methyl 3-(4-fluorophenyl)bicyclo [1.1.0]butane-1-carboxylate **2e** (0.049 g, 0.24 mmol) with Bi(OTf)<sub>3</sub> (0.013 g, 0.02 mmol) in CH<sub>2</sub>Cl<sub>2</sub> (1.5 mL) at 25 °C for 12 h followed by flash column chromatography (Pet. ether/ EtOAc = 80/20) of the crude reaction mixture using silica gel afforded methyl-3-(4-fluorophenyl)-3-(2-hydroxynaphthalen-1-yl)cyclobutane-1-carboxylate **3e** as yellow solid (0.066 g, 94% yield).

*R<sub>f</sub>* (Pet. ether /EtOAc = 90/10): 0.23; Melting point: 172-174 °C. <sup>1</sup>H NMR (400 MHz, CDCl<sub>3</sub>) δ 7.71-7.58 (m, 5H), 7.49-7.25 (m, 4H), 6.99-6.94 (m, 2H), 6.60 (s, 1H), 3.70 (s, 3H), 3.38-3.21 (m, 5H). <sup>13</sup>C NMR (100 MHz, CDCl<sub>3</sub>) δ 176.7, 161.4 (d, *J* = 244.4 Hz), 150.8, 142.4 (d, *J* = 3.3 Hz), 132.8, 132.1, 129.2, 129.0, 128.9, 128.0 (d, *J* = 7.9 Hz), 125.9, 124.2, 122.8, 118.8, 115.2 (d, *J* = 21.1 Hz), 52.1, 45.8, 40.8, 34.4. HRMS (ESI) *m/z*: [M+Na]<sup>+</sup> calcd for C<sub>22</sub>H<sub>19</sub>FNao<sub>3</sub> 373.1216; found 373.1217. FTIR (cm<sup>-1</sup>) 3345, 2952, 1704, 1503, 1431, 1215.

### Methyl-3-(2-hydroxynaphthalen-1-yl)-3-(3-methoxyphenyl)cyclobutane-1-carboxylate (**3f**)

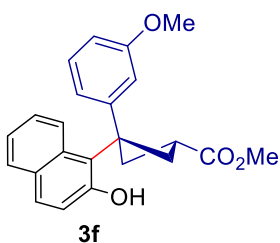

Following the general procedure, treatment of naphthalen-2-ol **1a** (0.029 g, 0.2 mmol) and methyl 3-(3-methoxyphenyl)bicyclo [1.1.0]butane-1-carboxylate **2f** (0.052 g, 0.24 mmol) with Bi(OTf)<sub>3</sub> (0.013 g, 0.02 mmol) in CH<sub>2</sub>Cl<sub>2</sub> (1.5 mL) at 25 °C for 12 h followed by flash column chromatography (Pet. ether/ EtOAc = 80/20) of the crude reaction mixture using silica gel afforded methyl-3-(2-hydroxynaphthalen-1-yl)-3-(3-methoxyphenyl)cyclobutane-1-carboxylate **3f** as yellow solid (0.055 g, 76% yield).

*R<sub>f</sub>* (Pet. ether /EtOAc = 90/10): 0.21; Melting point: 180-182 °C. <sup>1</sup>H NMR (400 MHz, CDCl<sub>3</sub>) δ 7.70-7.64 (m, 2H), 7.40 (d, *J* = 8.7 Hz, 1H), 7.36-7.22 (m, 5H), 6.90 (d, *J* = 8.8 Hz, 1H), 6.74 (dd, *J*<sub>1</sub> = 7.7 Hz, *J*<sub>2</sub> = 1.6 Hz, 1H), 6.14 (s, 1H), 3.75 (s, 3H), 3.67 (s, 3H), 3.48-3.25 (m, 5H). <sup>13</sup>C NMR (100 MHz, CDCl<sub>3</sub>) δ 176.4, 159.9, 150.8, 148.5, 132.3, 129.9, 129.6, 128.9, 128.8, 126.6, 125.9, 124.6, 122.8, 118.8, 113.6, 110.8, 55.3, 52.0, 46.2, 40.6, 34.5. HRMS (ESI) *m/z*: [M+Na]<sup>+</sup> calcd for C<sub>23</sub>H<sub>22</sub>NaO<sub>4</sub> 385.1410; found 385.1415. FTIR (cm<sup>-1</sup>) 3366, 2947, 1704, 1591, 1434, 1213.

### Methyl-3-(2-hydroxynaphthalen-1-yl)-3-(*m*-tolyl)cyclobutane-1-carboxylate (**3g**)

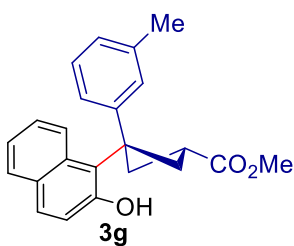

Following the general procedure, treatment of naphthalen-2-ol **1a** (0.029 g, 0.2 mmol) and methyl 3-(*m*-tolyl)bicyclo[1.1.0]butane-1-carboxylate **2g** (0.048 g, 0.24 mmol) with Bi(OTf)<sub>3</sub> (0.013 g, 0.02 mmol) in CH<sub>2</sub>Cl<sub>2</sub> (1.5 mL) at 25 °C for 12 h followed by flash column chromatography (Pet. ether/ EtOAc = 80/20) of the crude reaction mixture using silica gel afforded methyl-3-(2-hydroxynaphthalen-1-yl)-3-(*m*-tolyl)cyclobutane-1-carboxylate **3g** as yellow solid (0.062 g, 74% yield).

**R<sub>f</sub>** (Pet. ether /EtOAc = 90/10): 0.23; Melting point: 165-167 °C. **<sup>1</sup>H NMR (400 MHz, CDCl<sub>3</sub>)** δ 7.73-7.66 (m, 2H), 7.50-7.44 (m, 3H), 7.37-7.34 (m, 1H), 7.30-7.26 (m, 1H), 7.22-7.18 (m, 1H), 7.03-6.95 (m, 2H), 5.86 (s, 1H), 3.69 (s, 3H), 3.44-3.27 (m, 5H), 2.33 (s, 3H). **<sup>13</sup>C NMR (100 MHz, CDCl<sub>3</sub>)** δ 176.5, 150.7, 146.5, 138.2, 132.3, 129.8, 128.8, 128.8, 128.6, 127.2, 127.0, 126.8, 125.8, 124.6, 123.4, 122.8, 118.8, 52.0, 46.0, 40.6, 34.5, 21.9. **HRMS (ESI)** m/z: [M+Na]<sup>+</sup> calcd for C<sub>23</sub>H<sub>22</sub>NaO<sub>3</sub> 369.1467; found 369.1469. **FTIR (cm<sup>-1</sup>)** 3362, 2947, 1702, 1505, 1434, 1209.

### Benzyl 3-(2-hydroxynaphthalen-1-yl)-3-phenylcyclobutane-1-carboxylate (**3h**)

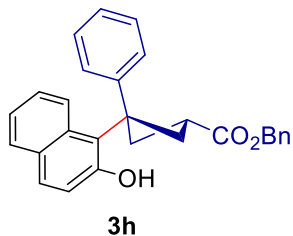

Following the general procedure, treatment of naphthalen-2-ol **1a** (0.029 g, 0.2 mmol) and benzyl 3-phenylbicyclo[1.1.0]butane-1-carboxylate **2h** (0.063 g, 0.24 mmol) with Bi(OTf)<sub>3</sub> (0.013 g, 0.02 mmol) in CH<sub>2</sub>Cl<sub>2</sub> (1.5 mL) at 25 °C for 12 h followed by flash column chromatography (Pet. ether/ EtOAc = 80/20) of the crude reaction mixture using silica gel afforded benzyl 3-(2-hydroxynaphthalen-1-yl)-3-phenylcyclobutane-1-carboxylate **3h** as sticky solid (0.063 g, 77% yield).

**R<sub>f</sub>** (Pet. ether /EtOAc = 90/10): 0.23; **<sup>1</sup>H NMR (400 MHz, CDCl<sub>3</sub>)** δ 7.75-7.70 (m, 4H), 7.46-7.29 (m, 10H), 7.22 (t, *J* = 7.5 Hz, 1H), 6.34 (s, 1H), 5.18 (s, 2H), 3.54-3.36 (m, 5H). **<sup>13</sup>C NMR (100 MHz, CDCl<sub>3</sub>)** δ 176.2, 150.8, 146.6, 135.8, 132.3, 129.7, 128.9, 128.7, 128.7, 128.6, 128.4, 128.3, 126.4, 126.3, 125.9, 124.5, 122.7, 118.8, 66.8, 46.2, 40.6, 34.7. **HRMS (ESI)** m/z: [M+Na]<sup>+</sup> calcd for C<sub>28</sub>H<sub>24</sub>NaO<sub>5</sub> 431.1618; found 431.1623. **FTIR (cm<sup>-1</sup>)** 3052, 2358, 1704, 1505, 1261, 1025.

### Isopropyl 3-(2-hydroxynaphthalen-1-yl)-3-phenylcyclobutane-1-carboxylate (**3i**)

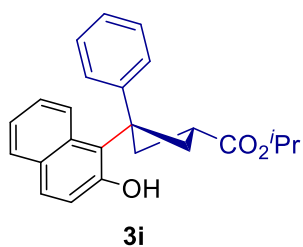

Following the general procedure, treatment of naphthalen-2-ol **1a** (0.029 g, 0.2 mmol) and isopropyl 3-phenylbicyclo[1.1.0] butane-1-carboxylate **2i** (0.051 g, 0.24 mmol) with Bi(OTf)<sub>3</sub> (0.013 g, 0.02 mmol) in CH<sub>2</sub>Cl<sub>2</sub> (1.5 mL) at 25 °C for 12 h followed by flash column chromatography (Pet. ether/ EtOAc = 80/20) of the crude reaction mixture using silica gel afforded isopropyl 3-(2-hydroxynaphthalen-1-yl)-3-phenylcyclobutane-1-carboxylate **3i** as sticky solid (0.048 g, 66% yield).

**R<sub>f</sub>** (Pet. ether /EtOAc = 90/10): 0.23; **<sup>1</sup>H NMR (400 MHz, CDCl<sub>3</sub>)** δ 7.72-7.66 (m, 4H), 7.43-7.26 (m, 5H), 7.19 (t, *J* = 7.3 Hz, 1H), 6.53 (s, 1H), 5.10-5.01 (m, 1H), 3.52-3.28 (m, 5H), 1.26 (s, 3H), 1.25 (s, 3H). **<sup>13</sup>C NMR (100 MHz, CDCl<sub>3</sub>)** δ 176.0, 150.9, 146.7, 132.3, 129.8, 128.9, 128.7, 128.6, 126.6, 126.5, 125.8, 124.6, 122.7, 118.9, 68.3, 46.1, 40.6, 34.9, 21.9. **HRMS (ESI)** *m/z*: [M+Na]<sup>+</sup> calcd for C<sub>24</sub>H<sub>24</sub>NaO<sub>3</sub> 383.1618; found 383.1625. **FTIR (cm<sup>-1</sup>)** 3315, 2926, 2356, 1703, 1502, 1215.

### Methyl-3-(2-hydroxy-7-methoxynaphthalen-1-yl)-3-phenylcyclobutane-1-carboxylate (**3j**)

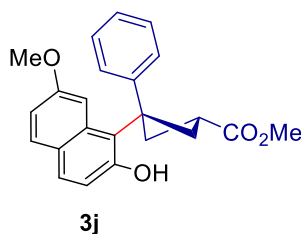

Following the general procedure, treatment of 7-methoxynaphthalen-2-ol **1b** (0.035 g, 0.2 mmol) and methyl 3-phenylbicyclo[1.1.0]butane-1-carboxylate **2a** (0.045 g, 0.24 mmol) with Bi(OTf)<sub>3</sub> (0.013 g, 0.02 mmol) in CH<sub>2</sub>Cl<sub>2</sub> (1.5 mL) at 25 °C for 12 h followed by flash column chromatography (Pet. ether/ EtOAc = 80/20) of the crude reaction mixture using silica gel afforded methyl-3-(2-hydroxy-7-methoxynaphthalen-1-yl)-3-phenylcyclobutane-1-carboxylate **3j** as yellow solid (0.061 g, 84% yield).

**R<sub>f</sub>** (Pet. ether /EtOAc = 90/10): 0.21; Melting point: 178-180 °C. **<sup>1</sup>H NMR (400 MHz, CDCl<sub>3</sub>)** δ 7.69-7.67 (m, 2H), 7.60 (d, *J* = 8.7 Hz, 1H), 7.43 (d, *J* = 8.6 Hz, 1H), 7.33-7.29 (m, 2H), 7.19 (t, *J* = 7.2 Hz, 1H), 6.96-6.92 (m, 2H), 6.81 (d, *J* = 8.7 Hz, 1H), 5.77 (s, 1H), 3.82 (s, 3H), 3.68 (s, 3H), 3.41-3.27 (m, 5H). **<sup>13</sup>C NMR (100 MHz, CDCl<sub>3</sub>)** δ 176.3, 157.6, 151.2, 146.5, 133.5, 130.2, 128.7, 128.5, 126.4, 126.4, 125.7, 125.2, 116.4, 114.9, 104.1, 55.2, 52.0, 46.2, 36.9, 34.3. **HRMS (ESI)** *m/z*: [M+Na]<sup>+</sup> calcd for C<sub>23</sub>H<sub>22</sub>NaO<sub>4</sub> 385.1410; found 385.1413. **FTIR (cm<sup>-1</sup>)** 3358, 2937, 1701, 1620, 1444, 1216.

### Methyl-3-(7-bromo-2-hydroxynaphthalen-1-yl)-3-phenylcyclobutane-1-carboxylate (**3k**)

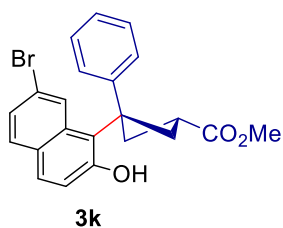

Following the general procedure, treatment of 7-bromonaphthalen-2-ol **1c** (0.045 g, 0.2 mmol) and methyl 3-phenylbicyclo[1.1.0]butane-1-carboxylate **2a** (0.045 g, 0.24 mmol) with Bi(OTf)<sub>3</sub> (0.013 g, 0.02 mmol) in CH<sub>2</sub>Cl<sub>2</sub> (1.5 mL) at 25 °C for 12 h followed by flash column chromatography (Pet. ether/ EtOAc = 80/20) of the crude reaction mixture using silica gel afforded methyl-3-(7-bromo-2-hydroxynaphthalen-1-yl)-3-phenylcyclobutane-1-carboxylate **3k** as yellow solid (0.076 g, 93% yield).

**R<sub>f</sub>** (Pet. ether /EtOAc = 90/10): 0.23; Melting point: 209-211 °C. **<sup>1</sup>H NMR (400 MHz, CDCl<sub>3</sub>)** δ 7.81 (d, *J* = 1.2 Hz, 1H), 7.67-7.65 (m, 2H), 7.50 (d, *J* = 8.5 Hz, 1H), 7.34-7.30 (m, 3H), 7.28-7.19 (m, 2H), 6.90 (d, *J* = 8.8 Hz, 1H), 6.74 (s, 1H), 3.72 (s, 3H), 3.51-3.08 (m, 5H). **<sup>13</sup>C NMR (100 MHz, CDCl<sub>3</sub>)** δ 177.2, 151.7, 146.1, 133.4, 130.4, 128.8, 128.6, 128.0, 126.7, 126.5, 126.3, 125.9, 125.8, 120.3, 119.1, 52.3, 46.0, 40.6, 34.5. **HRMS (ESI)** *m/z*: [M+Na]<sup>+</sup> calcd for C<sub>22</sub>H<sub>19</sub>BrNaO<sub>3</sub> 433.0410; found 433.0411. **FTIR (cm<sup>-1</sup>)** 3352, 2950, 1704, 1613, 1495, 1204.

### Methyl-3-(2-hydroxy-7-phenylnaphthalen-1-yl)-3-phenylcyclobutane-1-carboxylate (**3l**)

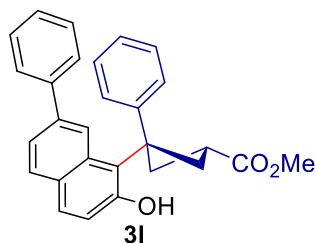

Following the general procedure, treatment of 7-phenylnaphthalen-2-ol **1d** (0.044 g, 0.2 mmol) and methyl 3-phenylbicyclo[1.1.0]butane-1-carboxylate **2a** (0.045 g, 0.24 mmol) with Bi(OTf)<sub>3</sub> (0.013 g, 0.02 mmol) in CH<sub>2</sub>Cl<sub>2</sub> (1.5 mL) at 25 °C for 12 h followed by flash column chromatography (Pet. ether/ EtOAc = 80/20) of the crude reaction mixture using silica gel afforded methyl-3-(2-hydroxy-7-phenylnaphthalen-1-yl)-3-phenylcyclobutane-1-carboxylate **3l** as orange solid (0.060 g, 73% yield).

**R<sub>f</sub>** (Pet. ether /EtOAc = 90/10): 0.23; Melting point: 130-132 °C. **<sup>1</sup>H NMR (400 MHz, CDCl<sub>3</sub>)** δ 7.92 (s, 1H), 7.79-7.73 (m, 3H), 7.64 (d, *J* = 7.6 Hz, 2H), 7.65-7.46 (m, 4H), 7.40-7.31 (m, 3H), 7.22-7.18 (m, 1H), 6.96 (d, *J* = 8.6 Hz, 1H), 6.27 (s, 1H), 3.70 (s, 3H), 3.52-3.35 (m, 5H). **<sup>13</sup>C NMR (100 MHz, CDCl<sub>3</sub>)** δ 176.8, 151.1, 146.6, 141.8, 138.4, 132.5, 129.4, 129.0, 129.0, 128.7, 128.4, 127.5, 127.3, 126.8, 126.4, 126.4, 122.8, 122.4, 118.9, 52.1, 46.2, 40.6, 34.6. **HRMS (ESI)** *m/z*: [M+Na]<sup>+</sup> calcd for C<sub>28</sub>H<sub>24</sub>NaO<sub>3</sub> 431.1623; found 431.1622. **FTIR (cm<sup>-1</sup>)** 3368, 2949, 1708, 1489, 1437, 1210.

**Methyl-3-(7-(2-chlorophenyl)-2-hydroxynaphthalen-1-yl)-3-phenylcyclobutane-1-carboxylate (3m)**

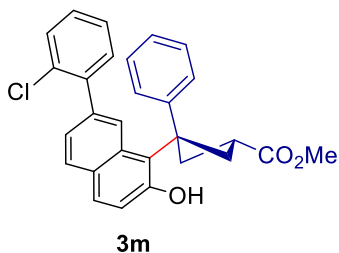

Following the general procedure, treatment of 7-(2-chlorophenyl)naphthalen-2-ol **1e** (0.051 g, 0.2 mmol) and methyl 3-phenylbicyclo[1.1.0]butane-1-carboxylate **2a** (0.045 g, 0.24 mmol) with Bi(OTf)<sub>3</sub> (0.013 g, 0.02 mmol) in CH<sub>2</sub>Cl<sub>2</sub> (1.5 mL) at 25 °C for 12 h followed by flash column chromatography (Pet. ether/ EtOAc = 80/20) of the crude reaction mixture using silica gel afforded methyl-3-(7-(2-chlorophenyl)-2-hydroxynaphthalen-1-yl)-3-phenylcyclobutane-1-carboxylate **3m** as yellow solid (0.063 g, 71% yield).

**R<sub>f</sub>** (Pet. ether /EtOAc = 90/10): 0.23; Melting point: 205-207 °C. **<sup>1</sup>H NMR (400 MHz, CDCl<sub>3</sub>)** δ 7.78-7.68 (m, 4H), 7.51-7.45 (m, 2H), 7.40-7.26 (m, 6H), 7.18 (t, *J* = 7.2 Hz, 1H), 6.98 (d, *J* = 8.7 Hz, 1H), 6.19 (s, 1H), 3.69 (s, 3H), 3.37-3.35 (m, 5H). **<sup>13</sup>C NMR (100 MHz, CDCl<sub>3</sub>)** δ 176.7, 151.1, 146.5, 141.1, 136.7, 132.7, 132.0, 131.8, 130.2, 129.0, 128.7, 128.6, 128.6, 127.0, 127.0, 126.5, 126.4, 125.4, 124.5, 119.3, 52.1, 46.2, 40.9, 34.6. **HRMS (ESI)** *m/z*: [M+Na]<sup>+</sup> calcd for C<sub>28</sub>H<sub>23</sub>ClNaO<sub>3</sub> 465.1228; found 465.1233. **FTIR (cm<sup>-1</sup>)** 3241, 2948, 1690, 1434, 1334, 1221.

**Methyl-3-(2-hydroxy-7-(thiophen-3-yl)naphthalen-1-yl)-3-phenylcyclobutane-1-carboxylate (3n)**

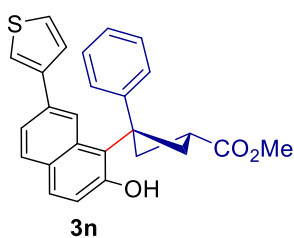

Following the general procedure, treatment of 7-(thiophen-3-yl)naphthalen-2-ol **1f** (0.045 g, 0.2 mmol) and methyl 3-phenylbicyclo[1.1.0]butane-1-carboxylate **2a** (0.045 g, 0.24 mmol) with Bi(OTf)<sub>3</sub> (0.013 g, 0.02 mmol) in CH<sub>2</sub>Cl<sub>2</sub> (1.5 mL) at 25 °C for 12 h followed by flash column chromatography (Pet. ether/ EtOAc = 80/20) of the crude reaction mixture using silica gel afforded methyl-3-(2-hydroxy-7-(thiophen-3-yl)naphthalen-1-yl)-3-phenylcyclobutane-1-carboxylate **3n** as yellow solid (0.065 g, 78% yield).

**R<sub>f</sub>** (Pet. ether /EtOAc = 90/10): 0.23; Melting point: 204-206 °C. **<sup>1</sup>H NMR (400 MHz, CDCl<sub>3</sub>)** δ 7.91 (s, 1H), 7.78-7.71 (m, 3H), 7.54-7.39 (m, 7H), 7.20 (t, *J* = 7.3 Hz, 1H), 6.92 (d, *J* = 8.7 Hz, 1H), 6.39 (s, 1H), 3.70 (s, 3H), 3.57-3.12 (m, 5H). **<sup>13</sup>C NMR (100 MHz, CDCl<sub>3</sub>)** δ 176.8, 151.2, 146.6, 143.0, 133.0, 132.5, 132.3, 129.4, 128.9, 128.8, 128.5, 126.7, 126.5, 126.5, 126.4,

121.9, 121.8, 120.5, 118.7, 52.2, 46.3, 40.6, 34.5. **HRMS (ESI)**  $m/z$ :  $[M+Na]^+$  calcd for  $C_{26}H_{22}NaO_3S$  437.1182; found 437.1184. **FTIR** ( $cm^{-1}$ ) 3343, 2950, 1699, 1618, 1443, 1213.

**Methyl-3-(6-(benzyloxy)-2-hydroxynaphthalen-1-yl)-3-phenylcyclobutane-1-carboxylate (3o)**

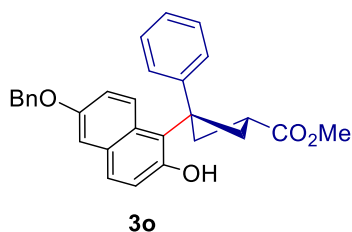

Following the general procedure, treatment of 6-(benzyloxy)naphthalen-2-ol **1g** (0.050 g, 0.2 mmol) and methyl 3-phenylbicyclo[1.1.0]butane-1-carboxylate **2a** (0.045 g, 0.24 mmol) with  $Bi(OTf)_3$  (0.013 g, 0.02 mmol) in  $CH_2Cl_2$  (1.5 mL) at 25 °C for 12 h followed by flash column chromatography (Pet. ether/ EtOAc = 80/20) of the crude reaction mixture using silica gel afforded methyl-3-(6-(benzyloxy)-2-hydroxynaphthalen-1-yl)-3-phenylcyclobutane-1-carboxylate **3o** as yellow solid (0.081 g, 92% yield).

**R<sub>f</sub>** (Pet. ether /EtOAc = 90/10): 0.23; Melting point: 167-169 °C. **<sup>1</sup>H NMR (400 MHz,  $CDCl_3$ )**  $\delta$  7.65-7.58 (m, 3H), 7.48-7.28 (m, 8H), 7.21-7.10 (m, 3H), 6.92 (d,  $J$  = 8.8 Hz, 1H), 5.67 (s, 1H), 5.13 (s, 2H), 3.68 (s, 3H), 3.43-3.07 (m, 5H). **<sup>13</sup>C NMR (100 MHz,  $CDCl_3$ )**  $\delta$  176.3, 154.6, 149.2, 146.6, 137.2, 132.3, 130.9, 129.2, 128.7, 128.7, 128.1, 127.6, 127.6, 127.2, 126.4, 126.1, 119.4, 118.6, 108.8, 70.2, 52.0, 46.2, 40.7, 34.5. **HRMS (ESI)**  $m/z$ :  $[M+Na]^+$  calcd for  $C_{29}H_{26}NaO_4$  461.1723; found 461.1727. **FTIR** ( $cm^{-1}$ ) 3401, 2946, 1709, 1607, 1367, 1228.

**Methyl 3-(6-bromo-2-hydroxynaphthalen-1-yl)-3-phenylcyclobutane-1-carboxylate (3p)**

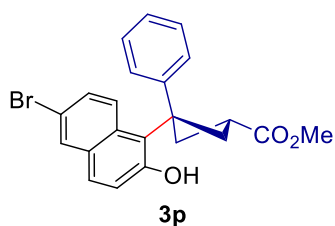

Following the general procedure, treatment of methyl 6-bromonaphthalen-2-ol **1h** (0.045 g, 0.2 mmol) and methyl 3-phenylbicyclo[1.1.0]butane-1-carboxylate **2a** (0.045 g, 0.24 mmol) with  $Bi(OTf)_3$  (0.013 g, 0.02 mmol) in  $CH_2Cl_2$  (1.5 mL) at 25 °C for 12 h followed by flash column chromatography (Pet. ether/ EtOAc = 80/20) of the crude reaction mixture using silica gel afforded methyl 3-(6-bromo-2-hydroxynaphthalen-1-yl)-3-phenylcyclobutane-1-carboxylate **3p** as yellow solid (0.062 g, 76% yield).

**R<sub>f</sub>** (Pet. ether /EtOAc = 90/10): 0.23; Melting point: 203-205 °C. **<sup>1</sup>H NMR (400 MHz,  $CDCl_3$ )**  $\delta$  7.80 (d,  $J$  = 1.6 Hz, 1H), 7.64 (d,  $J$  = 7.8 Hz, 2H), 7.53-7.50 (m, 1H), 7.41-7.38 (m, 1H), 7.32-7.17 (m, 4H), 6.92 (d,  $J$  = 8.7 Hz, 1H), 6.79 (s, 1H), 3.72 (s, 3H), 3.43-3.28 (m, 5H). **<sup>13</sup>C NMR (100 MHz,  $CDCl_3$ )**  $\delta$  177.1, 151.2, 146.3, 131.0, 130.8, 130.7, 129.0, 128.7, 127.7,

126.8, 126.5, 126.3, 126.2, 119.9, 116.4, 52.2, 46.1, 40.6, 34.5. **HRMS (ESI)**  $m/z$ :  $[M+Na]^+$  calcd for  $C_{22}H_{19}BrNaO_3$  433.0410; found 433.0412. **FTIR (cm<sup>-1</sup>)** 3320, 2939, 2356, 1702, 1589, 1209.

**Methyl-3-(6-(2,3-dimethylphenyl)-2-hydroxynaphthalen-1-yl)-3-phenylcyclobutane-1-carboxylate (3q)**

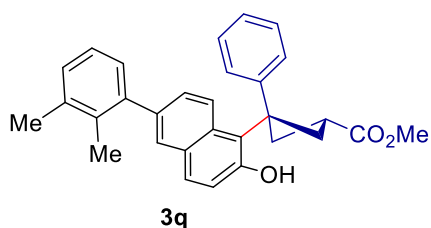

Following the general procedure, treatment of 6-(2,3-dimethylphenyl)naphthalen-2-ol **1i** (0.050 g, 0.2 mmol) and methyl 3-phenylbicyclo[1.1.0]butane-1-carboxylate **2a** (0.045 g, 0.24 mmol) with  $Bi(OTf)_3$  (0.013 g, 0.02 mmol) in  $CH_2Cl_2$  (1.5 mL) at 25 °C for 12 h followed by flash column chromatography (Pet. ether/ EtOAc = 80/20) of the crude reaction mixture using silica gel afforded methyl-3-(6-(2,3-dimethylphenyl)-2-hydroxynaphthalen-1-yl)-3-phenylcyclobutane-1-carboxylate **3q** as yellow solid (0.087 g, 97% yield).

**R<sub>f</sub>** (Pet. ether /EtOAc = 90/10): 0.23; Melting point: 141-143 °C. **<sup>1</sup>H NMR (400 MHz, CDCl<sub>3</sub>)**  $\delta$  7.71-7.53 (m, 5H), 7.35-7.32 (m, 3H), 7.23-7.12 (m, 4H), 7.00 (d,  $J$  = 8.7 Hz, 1H), 5.63 (s, 1H), 3.69 (s, 3H), 3.43-3.31 (m, 5H), 2.36 (s, 3H), 2.18 (s, 3H). **<sup>13</sup>C NMR (100 MHz, CDCl<sub>3</sub>)**  $\delta$  176.2, 150.6, 146.5, 142.1, 137.3, 137.2, 134.4, 131.0, 129.8, 129.0, 128.9, 128.9, 128.8, 128.1, 128.0, 126.8, 126.5, 125.4, 124.2, 119.1, 52.0, 46.2, 40.6, 34.5, 20.8, 17.3. **HRMS (ESI)**  $m/z$ :  $[M+Na]^+$  calcd for  $C_{30}H_{28}NaO_3$  459.1931; found 459.1937. **FTIR (cm<sup>-1</sup>)** 3349, 2946, 1689, 1486, 1440, 1208.

**Methyl-3-(6-hydroxy-[2,2'-binaphthalen]-5-yl)-3-phenylcyclobutane-1-carboxylate (3r)**

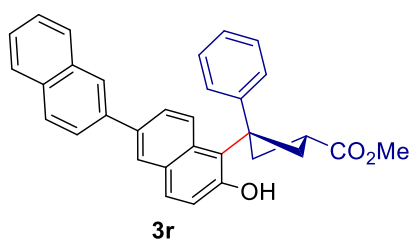

Following the general procedure, treatment of [2,2'-binaphthalen]-6-ol **1j** (0.054 g, 0.2 mmol) and methyl 3-phenylbicyclo[1.1.0]butane-1-carboxylate **2a** (0.045 g, 0.24 mmol) with  $Bi(OTf)_3$  (0.013 g, 0.02 mmol) in  $CH_2Cl_2$  (1.5 mL) at 25 °C for 12 h followed by flash column chromatography (Pet. ether/ EtOAc = 80/20) of the crude reaction mixture using silica gel afforded methyl-3-(6-hydroxy-[2,2'-binaphthalen]-5-yl)-3-phenylcyclobutane-1-carboxylate **3r** as yellow solid (0.076 g, 83% yield).

**R<sub>f</sub>** (Pet. ether /EtOAc = 90/10): 0.23; Melting point: 111-113 °C. **<sup>1</sup>H NMR (400 MHz, CDCl<sub>3</sub>)**  $\delta$  8.11 (s, 1H), 7.98 (s, 1H), 7.89-7.87 (m, 3H), 7.82-7.73 (m, 5H), 7.51-7.49 (m, 2H), 7.42 (d,

$J = 8.9$  Hz, 1H), 7.34 (d,  $J = 7.8$  Hz, 2H), 7.22 (t,  $J = 7.3$  Hz, 1H), 6.98 (d,  $J = 8.6$  Hz, 1H), 6.46 (s, 1H), 3.73 (s, 3H), 3.58-3.37 (m, 5H).  $^{13}\text{C}$  NMR (100 MHz,  $\text{CDCl}_3$ )  $\delta$  177.0, 151.0, 146.6, 138.3, 135.0, 133.9, 132.6, 131.5, 130.1, 129.1, 128.7, 128.6, 128.3, 127.8, 127.0, 126.5, 126.4, 126.4, 126.4, 125.9, 125.6, 125.6, 125.5, 125.1, 119.3, 52.2, 46.2, 40.6, 34.6. HRMS (ESI)  $m/z$ :  $[\text{M}+\text{Na}]^+$  calcd for  $\text{C}_{32}\text{H}_{26}\text{NaO}_3$  481.1774; found 481.1780. FTIR ( $\text{cm}^{-1}$ ) 3359, 2947, 1700, 1602, 1436, 1200.

### Methyl 6-hydroxy-5-(3-(methoxycarbonyl)-1-phenylcyclobutyl)-2-naphthoate (3s)

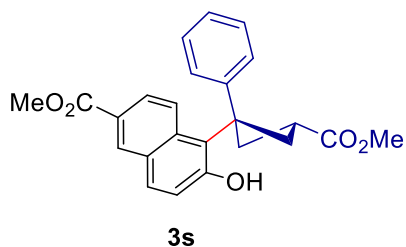

Following the general procedure, treatment of methyl 6-hydroxy-2-naphthoate **1k** (0.04 g, 0.2 mmol) and methyl 3-phenylbicyclo[1.1.0]butane-1-carboxylate **2a** (0.045 g, 0.24 mmol) with  $\text{Bi}(\text{OTf})_3$  (0.013 g, 0.02 mmol) in  $\text{CH}_2\text{Cl}_2$  (1.5 mL) at 25 °C for 12 h followed by flash column chromatography (Pet. ether/ EtOAc = 80/20) of the crude reaction mixture using silica gel afforded methyl 6-hydroxy-5-(3-(methoxycarbonyl)-1-phenylcyclobutyl)-2-naphthoate **3s** as yellow solid (0.062 g, 79% yield).

$R_f$  (Pet. ether /EtOAc = 90/10): 0.25; Melting point: 229-231 °C.  $^1\text{H}$  NMR (400 MHz,  $\text{CDCl}_3$ )  $\delta$  8.14 (s, 1H), 7.91 (d,  $J = 9.0$  Hz, 1H), 7.69-7.64 (m, 3H), 7.47 (d,  $J = 8.8$  Hz, 1H), 7.32-7.26 (m, 2H), 7.18 (t,  $J = 7.2$  Hz, 1H), 7.0 (d,  $J = 8.8$  Hz, 1H), 6.72 (s, 1H), 3.96 (s, 3H), 3.70 (s, 3H), 3.40-3.25 (m, 5H).  $^{13}\text{C}$  NMR (100 MHz,  $\text{CDCl}_3$ )  $\delta$  176.9, 167.6, 153.0, 146.2, 134.8, 132.0, 130.3, 128.7, 126.8, 126.5, 126.4, 125.3, 124.6, 124.2, 119.6, 52.3, 52.2, 46.0, 40.5, 34.5. HRMS (ESI)  $m/z$ :  $[\text{M}+\text{Na}]^+$  calcd for  $\text{C}_{24}\text{H}_{22}\text{NaO}_5$  413.1359; found 413.1365. FTIR ( $\text{cm}^{-1}$ ) 3384, 2951, 2356, 1722, 1434, 1300.

### Methyl-3-(4-bromo-2-hydroxynaphthalen-1-yl)-3-phenylcyclobutane-1-carboxylate (3t)

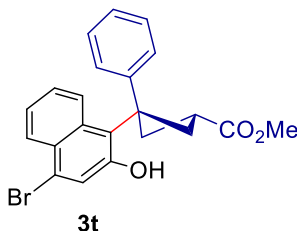

Following the general procedure, treatment of 4-bromonaphthalen-2-ol **1l** (0.045 g, 0.2 mmol) and methyl 3-phenylbicyclo[1.1.0]butane-1-carboxylate **2a** (0.045 g, 0.24 mmol) with  $\text{Bi}(\text{OTf})_3$  (0.013 g, 0.02 mmol) in  $\text{CH}_2\text{Cl}_2$  (1.5 mL) at 25 °C for 12 h followed by flash column chromatography (Pet. ether/ EtOAc = 80/20) of the crude reaction mixture using silica gel afforded methyl-3-(4-bromo-2-hydroxynaphthalen-1-yl)-3-phenylcyclobutane-1-carboxylate **3t** as yellow solid (0.067 g, 81% yield).

**R<sub>f</sub>** (Pet. ether /EtOAc = 90/10): 0.23; Melting point: 202-204 °C. **<sup>1</sup>H NMR (400 MHz, CDCl<sub>3</sub>)** δ 8.08-8.06 (m, 1H), 7.67-7.61 (m, 3H), 7.38-7.29 (m, 5H), 7.20 (t, *J* = 7.5 Hz, 1H), 7.08 (s, 1H), 3.75 (s, 3H), 3.49-3.29 (m, 5H). **<sup>13</sup>C NMR (100 MHz, CDCl<sub>3</sub>)** δ 177.4, 150.7, 146.2, 133.1, 128.7, 128.0, 127.9, 126.8, 126.6, 126.5, 126.3, 124.8, 124.1, 122.6, 122.2, 52.4, 46.0, 40.7, 34.5. **HRMS (ESI)** *m/z*: [M+Na]<sup>+</sup> calcd for C<sub>22</sub>H<sub>19</sub>BrNaO<sub>3</sub> 433.0410; found 433.0412. **FTIR (cm<sup>-1</sup>)** 3220, 2942, 1693, 1500, 1429, 1224.

**Methyl-3-(2-hydroxy-4-phenylnaphthalen-1-yl)-3-phenylcyclobutane-1-carboxylate (3u)**

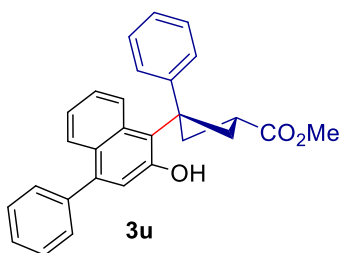

Following the general procedure, treatment of 4-phenylnaphthalen-2-ol **1m** (0.044 g, 0.2 mmol) and methyl 3-phenylbicyclo[1.1.0]butane-1-carboxylate **2a** (0.045 g, 0.24 mmol) with Bi(OTf)<sub>3</sub> (0.013 g, 0.02 mmol) in CH<sub>2</sub>Cl<sub>2</sub> (1.5 mL) at 25 °C for 12 h followed by flash column chromatography (Pet. ether/ EtOAc = 80/20) of the crude reaction mixture using silica gel afforded methyl-3-(2-hydroxy-4-phenylnaphthalen-1-yl)-3-phenylcyclobutane-1-carboxylate **3u** as yellow solid (0.069 g, 85% yield).

**R<sub>f</sub>** (Pet. ether /EtOAc = 90/10): 0.23; Melting point: 189-191 °C. **<sup>1</sup>H NMR (400 MHz, CDCl<sub>3</sub>)** δ 7.73-7.68 (m, 4H), 7.40-7.31 (m, 6H), 7.26-7.17 (m, 4H), 6.92 (s, 1H), 6.15 (s, 1H), 3.68 (s, 3H), 3.49-3.32 (m, 5H). **<sup>13</sup>C NMR (100 MHz, CDCl<sub>3</sub>)** δ 176.7, 150.1, 146.7, 141.0, 140.2, 132.7, 130.0, 128.7, 128.3, 128.2, 127.3, 127.0, 126.5, 126.4, 126.1, 125.8, 124.8, 122.9, 119.8, 52.1, 46.1, 40.6, 34.5. **HRMS (ESI)** *m/z*: [M+Na]<sup>+</sup> calcd for C<sub>28</sub>H<sub>24</sub>NaO<sub>3</sub> 431.1618; found 431.1620. **FTIR (cm<sup>-1</sup>)** 3365, 2945, 1697, 1602, 1434, 1214.

**Methyl-3-(4-(2-chlorophenyl)-2-hydroxynaphthalen-1-yl)-3-phenylcyclobutane-1-carboxylate (3v)**

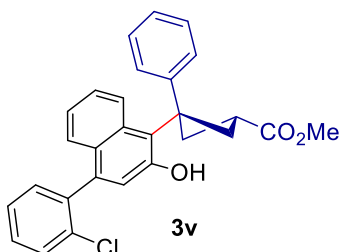

Following the general procedure, treatment of 4-(2-chlorophenyl)naphthalen-2-ol **1n** (0.051 g, 0.2 mmol) and methyl 3-phenylbicyclo[1.1.0]butane-1-carboxylate **2a** (0.045 g, 0.24 mmol) with Bi(OTf)<sub>3</sub> (0.013 g, 0.02 mmol) in CH<sub>2</sub>Cl<sub>2</sub> (1.5 mL) at 25 °C for 12 h followed by flash column chromatography (Pet. ether/ EtOAc = 80/20) of the crude reaction mixture using silica gel afforded methyl-3-(4-(2-chlorophenyl)-2-hydroxynaphthalen-1-yl)-3-phenylcyclobutane-1-carboxylate **3v** as yellow solid (0.063 g, 71% yield).

**R<sub>f</sub>** (Pet. ether /EtOAc = 90/10): 0.23; Melting point: 193-195 °C. **<sup>1</sup>H NMR (400 MHz, CDCl<sub>3</sub>)** δ 7.76-7.73 (m, 3H), 7.50 (d, *J* = 8.2 Hz, 1H), 7.38-7.17 (m, 9H), 6.92 (s, 1H), 6.43 (bs, 1H), 3.68 (s, 3H), 3.56-3.14 (m, 5H). **<sup>13</sup>C NMR (100 MHz, CDCl<sub>3</sub>)** δ 176.7, 150.0, 146.6, 138.9, 138.0, 134.1, 132.5, 132.1, 129.6, 129.0, 128.7, 128.5, 128.1, 126.8, 126.7, 126.6, 126.4, 125.8, 124.8, 123.0, 120.2, 52.1, 46.2, 40.7, 34.6. **HRMS (ESI)** *m/z*: [M+Na]<sup>+</sup> calcd for C<sub>28</sub>H<sub>23</sub>ClNaO<sub>3</sub> 465.1228; found 465.1235. **FTIR (cm<sup>-1</sup>)** 3350, 2948, 1702, 1434, 1369, 1208.

**Methyl-3-(2-hydroxy-3-methoxynaphthalen-1-yl)-3-phenylcyclobutane-1-carboxylate (3w)**

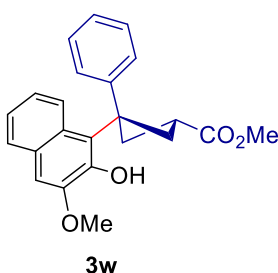

Following the general procedure, treatment of 3-methoxynaphthalen-2-ol **1o** (0.035 g, 0.2 mmol) and methyl 3-phenylbicyclo[1.1.0]butane-1-carboxylate **2a** (0.045 g, 0.24 mmol) with Bi(OTf)<sub>3</sub> (0.013 g, 0.02 mmol) in CH<sub>2</sub>Cl<sub>2</sub> (1.5 mL) at 25 °C for 12 h followed by flash column chromatography (Pet. ether/ EtOAc = 80/20) of the crude reaction mixture using silica gel afforded methyl-3-(2-hydroxy-3-methoxynaphthalen-1-yl)-3-phenylcyclobutane-1-carboxylate **3w** as sticky solid (0.056 g, 78% yield, 2:1 dr).

**R<sub>f</sub>** (Pet. ether /EtOAc = 90/10): 0.21; **<sup>1</sup>H NMR (400 MHz, CDCl<sub>3</sub>) of Major isomer** δ 7.73-7.64 (m, 4H), 7.34-7.12 (m, 5H), 7.02 (s, 1H), 6.34 (s, 1H), 3.98 (s, 3H), 3.65 (s, 3H), 3.57-3.04 (m, 5H). **Representative peaks of minor isomer <sup>1</sup>H NMR (400 MHz, CDCl<sub>3</sub>)** 7.57 (d, *J* = 8.3 Hz, 1H), 7.06 (s, 1H), 6.45 (s, 1H), 4.02 (s, 3H). **<sup>13</sup>C NMR (100 MHz, CDCl<sub>3</sub>) of Major isomer** δ 175.7, 147.1, 146.6, 142.9, 129.4, 128.5, 127.62, 127.60, 126.6, 126.4, 125.2, 124.4, 123.8, 123.4, 104.8, 56.0, 51.7, 46.3, 39.7, 34.4. **Representative peaks of minor isomer <sup>13</sup>C NMR (100 MHz, CDCl<sub>3</sub>)** 176.3, 147.6, 143.4, 129.5, 125.2, 105.0, 56.1, 51.8, 48.1, 33.9. **HRMS (ESI)** *m/z*: [M+Na]<sup>+</sup> calcd for C<sub>23</sub>H<sub>22</sub>NaO<sub>4</sub> 385.1410; found 385.1415. **FTIR (cm<sup>-1</sup>)** 3412, 2944, 1717, 1428, 1246, 1187.

**Methyl-3-(1-hydroxynaphthalen-2-yl)-3-phenylcyclobutane-1-carboxylate (3x)**

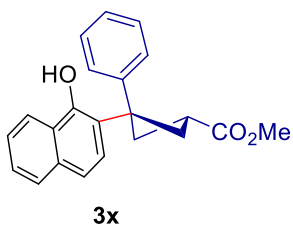

Following the general procedure, treatment of naphthalen-1-ol **1p** (0.029 g, 0.2 mmol) and methyl 3-phenylbicyclo[1.1.0]butane-1-carboxylate **2a** (0.045 g, 0.24 mmol) with Bi(OTf)<sub>3</sub> (0.013 g, 0.02 mmol) in CH<sub>2</sub>Cl<sub>2</sub> (1.5 mL) at 25 °C for 12 h followed by flash column chromatography (Pet. ether/ EtOAc = 80/20) of the crude reaction

mixture using silica gel afforded methyl-3-(1-hydroxynaphthalen-2-yl)-3-phenylcyclobutane-1-carboxylate **3x** as white solid (0.032 g, 48% yield).

**R<sub>f</sub>** (Pet. ether /EtOAc = 90/10): 0.22; Melting point: 187-189 °C. **<sup>1</sup>H NMR (400 MHz, CDCl<sub>3</sub>)** δ 8.10-8.08 (m, 1H), 7.84-7.82 (m, 1H), 7.73 (d, *J* = 8.7 Hz, 1H), 7.57 (d, *J* = 8.6 Hz, 1H), 7.49-7.42 (m, 2H), 7.37-7.32 (m, 4H), 7.24-7.20 (m, 1H), 4.95 (s, 1H), 3.70 (s, 3H), 3.15-3.03 (m, 5H). **<sup>13</sup>C NMR (100 MHz, CDCl<sub>3</sub>)** δ 175.4, 149.5, 146.2, 134.0, 129.2, 127.6, 127.1, 126.2, 126.1, 125.7, 125.6, 125.4, 124.3, 121.5, 120.3, 52.0, 45.5, 37.2, 33.0. **HRMS (ESI)** *m/z*: [M+Na]<sup>+</sup> calcd for C<sub>22</sub>H<sub>20</sub>NaO<sub>3</sub> 355.1305; found 355.1310. **FTIR (cm<sup>-1</sup>)** 3359, 2949, 1701, 1434, 1344, 1213.

### Methyl-3-(2-hydroxy-4,5-dimethoxyphenyl)-3-phenylcyclobutane-1-carboxylate (**3y**)

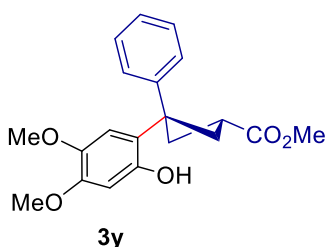

Following the general procedure, treatment of 3,4-dimethoxyphenol **1q** (0.031 g, 0.2 mmol) and methyl 3-phenylbicyclo[1.1.0]butane-1-carboxylate **2a** (0.045 g, 0.24 mmol) with Bi(OTf)<sub>3</sub> (0.013 g, 0.02 mmol) in CH<sub>2</sub>Cl<sub>2</sub> (1.5 mL) at 25 °C for 12 h followed by flash column chromatography (Pet. ether/ EtOAc = 80/20) of the crude reaction mixture using silica gel afforded methyl-3-(2-hydroxy-4,5-dimethoxyphenyl)-3-phenylcyclobutane-1-carboxylate **3y** as yellow oil (0.040 g, 58% yield).

**R<sub>f</sub>** (Pet. ether /EtOAc = 90/10): 0.20; **<sup>1</sup>H NMR (400 MHz, CDCl<sub>3</sub>)** δ 7.32-7.28 (m, 4H), 7.20-7.16 (m, 1H), 7.06 (s, 1H), 6.41 (s, 1H), 4.35 (s, 1H), 3.91 (s, 3H), 3.81 (s, 3H), 3.68 (s, 3H), 3.12-3.06 (m, 1H), 2.99-2.91 (m, 4H). **<sup>13</sup>C NMR (100 MHz, CDCl<sub>3</sub>)** δ 175.6, 149.2, 148.4, 146.8, 142.9, 128.9, 126.7, 126.0, 122.8, 111.4, 102.8, 57.3, 56.1, 52.0, 45.1, 37.1, 33.0. **HRMS (ESI)** *m/z*: [M+Na]<sup>+</sup> calcd for C<sub>20</sub>H<sub>22</sub>NaO<sub>5</sub> 365.1359; found 365.1360. **FTIR (cm<sup>-1</sup>)** 3311, 2940, 1692, 1517, 1352, 1197.

### Methyl-3-(6-hydroxybenzo[*d*][1,3]dioxol-5-yl)-3-phenylcyclobutane-1-carboxylate (**3z**)

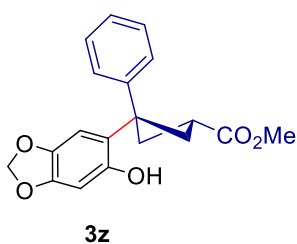

Following the general procedure, treatment of benzo[*d*][1,3]dioxol-5-ol **1r** (0.028 g, 0.2 mmol) and methyl 3-phenylbicyclo[1.1.0]butane-1-carboxylate **2a** (0.045 g, 0.24 mmol) with Bi(OTf)<sub>3</sub> (0.013 g, 0.02 mmol) in CH<sub>2</sub>Cl<sub>2</sub> (1.5 mL) at 25 °C for 12 h followed by flash column chromatography (Pet. ether/ EtOAc = 80/20) of the crude

reaction mixture using silica gel afforded methyl-3-(6-hydroxybenzo[*d*][1,3]dioxol-5-yl)-3-phenylcyclobutane-1-carboxylate **3z** as yellow oil (0.036 g, 55% yield).

**R<sub>f</sub>** (Pet. ether /EtOAc = 90/10): 0.20; **<sup>1</sup>H NMR (400 MHz, CDCl<sub>3</sub>)** δ 7.28-7.23 (m, 4H), 7.17-7.13 (m, 1H), 7.01 (s, 1H), 6.33 (s, 1H), 5.90 (s, 2H), 4.44 (s, 1H), 3.64 (s, 3H), 3.10-3.01 (m, 1H), 2.90-2.88 (m, 4H). **<sup>13</sup>C NMR (100 MHz, CDCl<sub>3</sub>)** δ 175.6, 148.9, 147.0, 146.8, 141.6, 128.8, 126.6, 126.0, 124.1, 106.5, 101.3, 100.1, 52.0, 45.4, 37.1, 33.1. **HRMS (ESI)** *m/z*: [M+Na]<sup>+</sup> calcd for C<sub>19</sub>H<sub>18</sub>NaO<sub>5</sub> 349.1046; found 349.1054. **FTIR (cm<sup>-1</sup>)** 3389, 2918, 1706, 1495, 1432, 1167.

### Methyl-3-(1-((4-methylphenyl)sulfonamido)naphthalen-2-yl)-3-phenylcyclobutane-1-carboxylate (**3aa**)

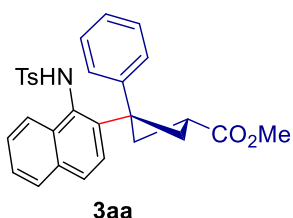

Following the general procedure, treatment of 4-methyl-*N*-(naphthalen-1-yl)benzenesulfonamide **1s** (0.059 g, 0.2 mmol) and methyl 3-phenylbicyclo[1.1.0]butane-1-carboxylate **2a** (0.045 g, 0.24 mmol) with Bi(OTf)<sub>3</sub> (0.013 g, 0.02 mmol) in CH<sub>2</sub>Cl<sub>2</sub> (1.5 mL) at 25 °C for 12 h followed by flash column chromatography (Pet. ether/ EtOAc = 80/20) of the crude reaction mixture using silica gel afforded methyl-3-(1-((4-methylphenyl)sulfonamido)naphthalen-2-yl)-3-phenylcyclobutane-1-carboxylate **3aa** as white solid (0.051 g, 52% yield, 3:1 dr).

**R<sub>f</sub>** (Pet. ether /EtOAc = 90/10): 0.20; Melting point: 159-161 °C. **<sup>1</sup>H NMR (400 MHz, CDCl<sub>3</sub>) of Major isomer** δ 7.85 (d, *J* = 8.2 Hz, 1H), 7.68 (d, *J* = 8.2 Hz, 2H), 7.55 (d, *J* = 8.3 Hz, 1H), 7.45-7.36 (m, 3H), 7.31-7.13 (m, 8H), 7.05 (s, 1H), 3.66 (s, 3H), 3.12-3.05 (m, 5H), 2.36 (s, 3H). **Representative peaks of minor isomer <sup>1</sup>H NMR (400 MHz, CDCl<sub>3</sub>)** 7.92 (d, *J* = 8.3 Hz, 1H), 3.70 (s, 3H), 2.37 (s, 3H). **<sup>13</sup>C NMR (100 MHz, CDCl<sub>3</sub>) of Major isomer** δ 175.2, 146.3, 144.2, 143.9, 136.7, 131.2, 130.6, 130.0, 129.7, 128.7, 128.5, 127.5, 126.3, 126.1, 126.0, 125.9, 124.1, 122.6, 122.2, 52.0, 47.4, 38.9, 33.2, 21.6. **Representative peaks of minor isomer <sup>13</sup>C NMR (100 MHz, CDCl<sub>3</sub>)** 175.5, 47.8, 38.7, 33.1. **HRMS (ESI)** *m/z*: [M+Na]<sup>+</sup> calcd for C<sub>29</sub>H<sub>27</sub>NNaO<sub>4</sub>S 508.1553; found 508.1561. **FTIR (cm<sup>-1</sup>)** 3354, 2791, 1710, 1595, 1210, 1149.

### 3-(2-Hydroxynaphthalen-1-yl)cyclobutyl(phenyl)methanone (**3ab**)

Following the general procedure, treatment of naphthalen-2-ol **2a** (0.029 g, 0.2 mmol) and bicyclo[1.1.0]butan-1-yl(phenyl)methanone **2j** (0.038 g, 0.24 mmol) with Bi(OTf)<sub>3</sub> (0.013 g, 0.02 mmol) in CH<sub>2</sub>Cl<sub>2</sub> (1.5 mL) at 25 °C for 12 h followed by flash column chromatography

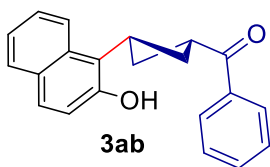

(Pet. ether/ EtOAc = 84/16) of the crude reaction mixture using silica gel afforded 3-(2-hydroxynaphthalen-1-yl)cyclobutyl(phenyl)methanone **3ab** as colorless oil (0.042 g, 70% yield, 2:1 dr).

**R<sub>f</sub>** (Pet. ether /EtOAc = 90/10): 0.24; **<sup>1</sup>H NMR (400 MHz, CDCl<sub>3</sub>) of Major isomer** δ 8.02-7.96 (m, 3H), 7.74 (d, *J* = 7.7 Hz, 1H), 7.63-7.56 (m, 2H), 7.50-7.41 (m, 3H), 7.32-7.28 (m, 1H), 7.08 (d, *J* = 8.9 Hz, 1H), 6.53 (s, 1H), 4.46-4.37 (m, 1H), 4.22-4.09 (m, 1H), 3.21-3.11 (m, 2H), 2.99-2.88 (m, 2H). **Representative peaks of minor isomer <sup>1</sup>H NMR (400 MHz, CDCl<sub>3</sub>)** 7.05 (d, *J* = 9.0 Hz, 1H), 5.62 (m, 1H). **<sup>13</sup>C NMR (100 MHz, CDCl<sub>3</sub>) of Major isomer** δ 202.8, 152.5, 135.8, 133.4, 133.3, 133.1, 129.4, 128.8, 128.7, 128.5, 126.2, 123.2, 123.0, 120.6, 119.5, 39.0, 32.3, 29.8. **Representative peaks of minor isomer <sup>13</sup>C NMR (100 MHz, CDCl<sub>3</sub>)** 202.1, 151.9, 135.6, 129.5, 126.3, 121.8, 39.1, 29.8. **HRMS (ESI) m/z:** [M+Na]<sup>+</sup> calcd for C<sub>21</sub>H<sub>18</sub>NaO<sub>2</sub> 325.1199; found 325.1204. **FTIR (cm<sup>-1</sup>)** 3354, 2926, 1663, 1325, 1221, 1079.

### 3-(2-Hydroxynaphthalen-1-yl)cyclobutyl(naphthalen-2-yl)methanone (3ac)

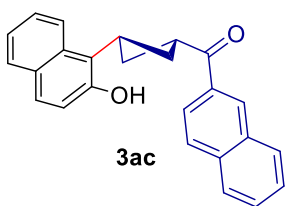

Following the general procedure, treatment of naphthalen-2-ol **2a** (0.029 g, 0.2 mmol) and bicyclo[1.1.0]butan-1-yl(naphthalen-2-yl)methanone **2k** (0.050 g, 0.24 mmol) with Bi(OTf)<sub>3</sub> (0.013 g, 0.02 mmol) in CH<sub>2</sub>Cl<sub>2</sub> (1.5 mL) at 25 °C for 12 h followed by flash column chromatography (Pet. ether/ EtOAc = 80/20) of the crude reaction mixture using silica gel afforded 3-(2-hydroxynaphthalen-1-yl)cyclobutyl(naphthalen-2-yl)methanone **3ac** as yellow solid (0.048 g, 68% yield, 2.3:1 dr).

**R<sub>f</sub>** (Pet. ether /EtOAc = 90/10): 0.24; Melting point: 180-182 °C. **<sup>1</sup>H NMR (400 MHz, CDCl<sub>3</sub>) of Major isomer** δ 8.52 (s, 1H), 8.11-7.87 (m, 5H), 7.76-7.74 (m, 1H), 7.63-7.53 (m, 3H), 7.48-7.41 (m, 1H), 7.33-7.29 (m, 1H), 7.11-7.06 (m, 1H), 6.57 (s, 1H), 4.54-4.25 (m, 2H), 3.28-3.17 (m, 2H), 3.06-2.91 (m, 2H). **Representative peaks of minor isomer <sup>1</sup>H NMR (400 MHz, CDCl<sub>3</sub>)** 5.64 (s, 1H). **<sup>13</sup>C NMR (100 MHz, CDCl<sub>3</sub>) of Major isomer** δ 202.7, 152.6, 135.9, 133.3, 132.7, 130.5, 130.2, 129.8, 129.5, 128.8, 128.7, 128.5, 128.0, 126.9, 126.3, 124.3, 123.3, 123.0, 120.7, 119.5, 118.9, 39.0, 32.4, 31.2. **Representative peaks of minor isomer <sup>13</sup>C NMR (100 MHz, CDCl<sub>3</sub>)** 202.0, 151.9, 39.2, 31.2. **HRMS (ESI) m/z:** [M+H]<sup>+</sup> calcd for C<sub>25</sub>H<sub>21</sub>O<sub>2</sub> 353.1536; found 353.1542. **FTIR (cm<sup>-1</sup>)** 3330, 2921, 1662, 1509, 1358, 1219.

## 10. Product Functionalization

### a) Reduction of the ester to alcohol

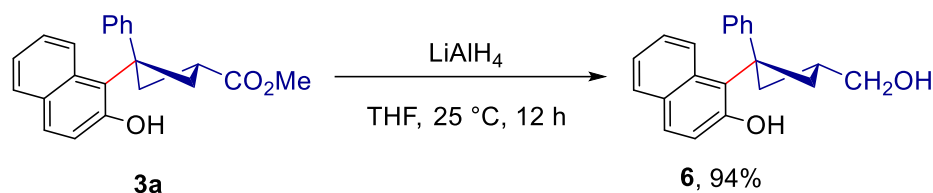

Compound **6** was prepared using the literature procedure.<sup>7</sup> To a 25 mL two neck round bottom flask equipped with stir bar, LiAlH<sub>4</sub> (0.015 g, 0.4 mmol) was dissolved in dry THF (1.0 mL). The reaction mixture was cooled to 0 °C with ice bath. Then, the solution of methyl-3-(2-hydroxynaphthalen-1-yl)-3-phenylcyclobutane-1-carboxylate **3a** (0.066 g, 0.2 mmol) in dry THF (1.0 mL) was added slowly and reaction mixture was allowed to stir for 12h at room temperature. After this time, the reaction was cooled to 0 °C and quenched with 10% KOH solution (2.0 mL). The resulting suspension was filtered through celite, washed with ethyl acetate. The combined filtrate was dried, concentrated and purified by flash column chromatography (Pet. ether /EtOAc = 80/20) of the crude reaction mixture afforded 1-(3-(hydroxymethyl)-1-phenylcyclobutyl)naphthalen-2-ol **6** as a white solid (0.057 g, 94% yield).

*R<sub>f</sub>* (Pet. ether /EtOAc = 90/10): 0.17; Melting point: 190-192 °C. **<sup>1</sup>H NMR (400 MHz, (CD<sub>3</sub>)<sub>2</sub>CO)** δ 8.64 (s, 1H), 7.82-7.72 (m, 4H), 7.63 (d, *J* = 8.8 Hz, 1H), 7.32-7.18 (m, 5H), 7.11 (t, *J* = 7.3 Hz, 1H), 3.56-3.52 (m, 3H), 3.11 (bs, 3H), 2.62-2.60 (m, 2H). **<sup>13</sup>C NMR (100 MHz, (CD<sub>3</sub>)<sub>2</sub>CO)** δ 152.7, 149.5, 133.6, 130.4, 129.4, 128.9, 128.8, 128.6, 127.4, 126.3, 126.0, 125.6, 123.0, 120.0, 67.1, 47.1, 41.5, 34.2, **HRMS (ESI)** *m/z*: [M+Na]<sup>+</sup> calcd for C<sub>21</sub>H<sub>20</sub>NaO<sub>2</sub> 327.1356; found 327.1361. **FTIR (cm<sup>-1</sup>)** 3458, 2926, 2359, 1436, 1338, 1230.

### b) Conversion of ester to acid

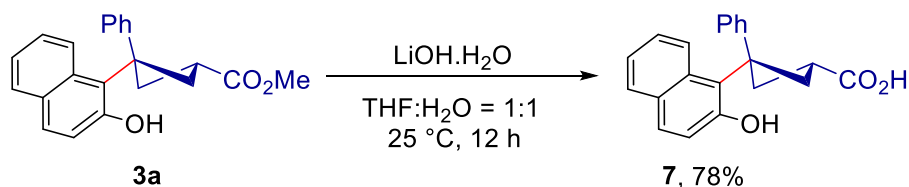

Following the general procedure,<sup>8</sup> methyl-3-(2-hydroxynaphthalen-1-yl)-3-phenylcyclobutane-1-carboxylate **3a** (0.066 g, 0.2 mmol) and lithium hydroxide monohydrate (0.017 g, 0.4 mmol) were dissolved in THF:H<sub>2</sub>O (1+1 mL) at 25 °C and stirred for 12 h. The

<sup>7</sup> A. O. Chagarovskiy, V. S. Vasin, V. V. Kuznetsov, O. A. Ivanova, V. B. Rybakov, A. N. Shumsky, N. N. Makhova and I. V. Trushkov, *Angew. Chem., Int. Ed.*, 2018, **57**, 10338.

<sup>8</sup> K. Dhake, K. J. Woelk, J. Becia, A. Un, S. E. Jenny and D. C. Leitch, *Angew. Chem., Int. Ed.*, 2022, **61**, e202204719.

mixture was then concentrated under reduced pressure. The resulting residue was dissolved in water (5 mL) and acidified with 1 M HCl to adjust the pH to 4-6. Once the solution reached the desired pH range, the aqueous phase was extracted with DCM (5 mL). The organic layer was dried using anhydrous Na<sub>2</sub>SO<sub>4</sub> and concentrated under reduced pressure, followed by purification via silica gel flash column chromatography (Pet. ether /EtOAc = 70/30) of the crude reaction mixture afforded 3-(2-hydroxynaphthalen-1-yl)-3-phenylcyclobutane-1-carboxylic acid **7** as white solid (0.050 g, 78% yield).

**R<sub>f</sub>** (Pet. ether /EtOAc = 70/30): 0.28; Melting point: 243-245 °C. **<sup>1</sup>H NMR (400 MHz, DMSO-*d*<sub>6</sub>)** δ 12.02 (s, 1H), 9.73 (s, 1H), 7.76-7.65 (m, 4H), 7.59 (d, *J* = 8.6 Hz, 1H), 7.32-7.13 (m, 6H), 3.37-2.87 (m, 5H). **<sup>13</sup>C NMR (100 MHz, DMSO-*d*<sub>6</sub>)** δ 176.0, 151.9, 147.3, 131.8, 128.7, 128.6, 128.2, 128.1, 126.2, 126.1, 125.8, 125.5, 123.9, 122.0, 119.2, 45.6, 33.8. **HRMS (ESI)** *m/z*: [M+Na]<sup>+</sup> calcd for C<sub>21</sub>H<sub>18</sub>NaO<sub>3</sub> 341.1148; found 341.1153. **FTIR (cm<sup>-1</sup>)**<sup>1</sup> 3375, 2354, 1650, 1220, 991.

**c) Conversion of alcohol to methyl ether**

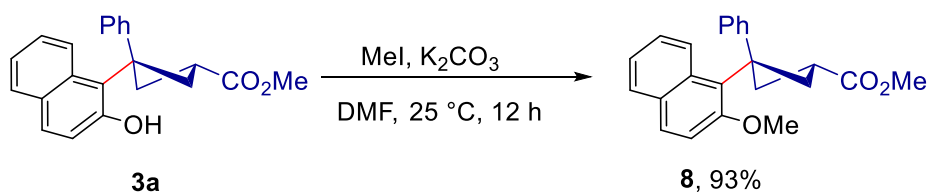

Compound **8** was synthesized following the modified literature procedure.<sup>9</sup> To a solution of **3a** (0.066 g, 0.2 mmol) in 2.0 mL DMF was added K<sub>2</sub>CO<sub>3</sub> (0.041 g, 0.3 mmol) and methyl iodide (0.042 g, 0.3 mmol) then the mixture was stirred at 25 °C for 12 h. Then the solvent was evaporated, and the residue was purified by column chromatography to give methyl-3-(2-methoxynaphthalen-1-yl)-3-phenylcyclobutane-1-carboxylate **8** as a white solid (0.064 g, 93% yield).

**R<sub>f</sub>** (Pet. ether /EtOAc = 90/10): 0.25; Melting point: 105-107 °C. **<sup>1</sup>H NMR (400 MHz, CDCl<sub>3</sub>)** δ 7.79-7.65 (m, 5H), 7.39-7.18 (m, 6H), 3.98 (s, 3H), 3.65 (s, 3H), 3.38-3.13 (m, 5H). **<sup>13</sup>C NMR (100 MHz, CDCl<sub>3</sub>)** δ 175.7, 154.3, 146.8, 132.0, 130.1, 129.8, 128.9, 128.8, 128.5, 126.5, 126.2, 125.9, 124.8, 123.1, 114.2, 56.2, 51.7, 46.5, 41.0, 34.6. **HRMS (ESI)** *m/z*: [M+Na]<sup>+</sup> calcd for C<sub>23</sub>H<sub>22</sub>NaO<sub>3</sub> 369.1461; found 369.1464. **FTIR (cm<sup>-1</sup>)**<sup>1</sup> 2954, 1727, 1598, 1439, 1251, 1153.

<sup>9</sup> P. Alvarez-Bercedo and R. Martin, *J. Am. Chem. Soc.*, 2010, **132**, 17353.

**d) Arylation of 3a**

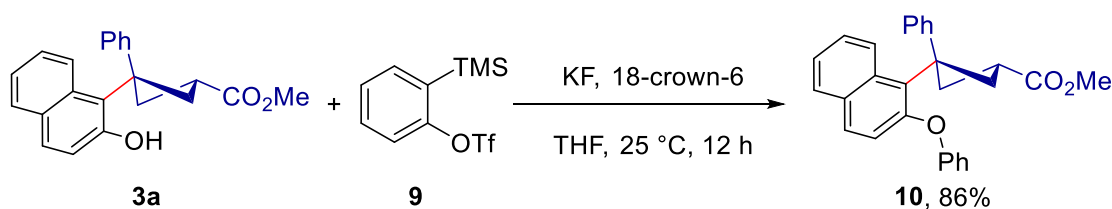

To an oven-dried screw-capped test tube equipped with a magnetic stir bar was added KF (0.035 g, 0.6 mmol) and 18-crown-6 (0.158 g, 0.6 mmol) in a nitrogen filled glove box. After that **3a** (0.066 g, 0.2 mmol) was added outside the glove-box in nitrogen atmosphere. Then THF (1.0 mL) was added followed by the addition of 2-(trimethylsilyl)phenyl trifluoromethanesulfonate **9** (0.090 g, 0.3 mmol). The mixture was stirred at 25 °C for 12 h. Then the solvent was evaporated, and the residue was purified by column chromatography to give methyl-3-(2-phenoxy-naphthalen-1-yl)-3-phenylcyclobutane-1-carboxylate **10** as a colorless oil (0.082 g, 86% yield).

**R<sub>f</sub>** (Pet. ether /EtOAc = 90/10): 0.24; **<sup>1</sup>H NMR (400 MHz, CDCl<sub>3</sub>)** δ 7.89 (d, *J* = 8.5 Hz, 1H), 7.81-7.74 (m, 3H), 7.68 (d, *J* = 9.0 Hz, 1H), 7.46-7.31 (m, 6H), 7.22-7.18 (m, 1H), 7.14-7.07 (m, 4H), 3.62 (s, 3H), 3.46-3.19 (m, 5H). **<sup>13</sup>C NMR (100 MHz, CDCl<sub>3</sub>)** δ 175.4, 157.3, 151.2, 146.2, 133.6, 132.2, 131.3, 129.9, 129.0, 128.9, 128.6, 126.6, 126.3, 126.1, 125.3, 124.4, 123.0, 120.2, 118.6, 51.7, 46.6, 40.9, 34.6. **HRMS (ESI)** *m/z*: [M+Na]<sup>+</sup> calcd for C<sub>28</sub>H<sub>24</sub>NaO<sub>3</sub> 431.1618; found 431.1622. **FTIR (cm<sup>-1</sup>)** 2948, 1727, 1587, 1487, 1367, 1218.

**e) Triflyl protection of 3a**

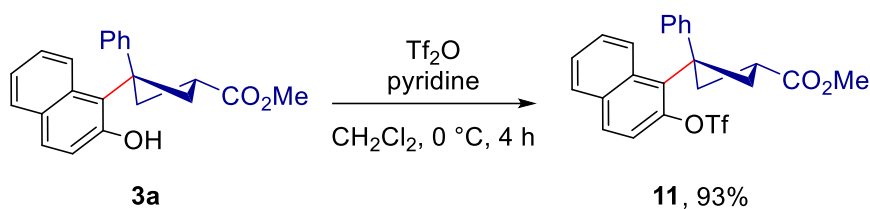

Compound **11** was synthesized following the literature procedure.<sup>10</sup> To a solution of methyl-3-(2-hydroxynaphthalen-1-yl)-3-phenylcyclobutane-1-carboxylate **3a** (0.066 g, 0.2 mmol) and pyridine (0.043g, 0.54 mmol) in CH<sub>2</sub>Cl<sub>2</sub> (2 mL) was added Tf<sub>2</sub>O (0.073 g, 0.26 mmol) dropwise at 0 °C under argon. The mixture was stirred at 0 °C for 3 h, then the reaction was quenched by the addition of water (1 mL). The organic layer was washed with water and brine and dried over Na<sub>2</sub>SO<sub>4</sub>. After removal of the solvent under reduced pressure, the residue

<sup>10</sup> D. Xu, T. M. Penning, I. A. Blair and R. G. Harvey, *J. Org. Chem.*, 2009, **74**, 597.

was purified by chromatography on a silica gel column eluted with hexane/EtOAc (10:1) to afford **11** as a colorless oil (0.086 g, 93% yield).

**R<sub>f</sub>** (Pet. ether /EtOAc = 90/10): 0.24; **<sup>1</sup>H NMR (400 MHz, CDCl<sub>3</sub>)** δ 7.93-7.87 (m, 2H), 7.78 (d, *J* = 8.5 Hz, 1H), 7.55-7.46 (m, 5H), 7.38-7.34 (m, 2H), 7.30-7.26 (m, 1H), 3.69 (s, 3H), 3.61-3.54 (m, 1H), 3.36-3.24 (m, 4H). **<sup>13</sup>C NMR (100 MHz, CDCl<sub>3</sub>)** δ 175.2, 145.6, 145.3, 136.5, 133.1, 132.2, 130.0, 129.1, 128.9, 127.02, 126.99, 126.7, 126.5, 126.3, 129.4 (unresolved quartet), 118.4 (*q*, *J* = 320 Hz), 52.0, 46.0, 40.0 (unresolved quartet), 34.2. **HRMS (ESI)** *m/z*: [M+Na]<sup>+</sup> calcd for C<sub>23</sub>H<sub>19</sub>F<sub>3</sub>NaO<sub>5</sub>S 487.0798; found 487.0802. **FTIR (cm<sup>-1</sup>)**<sup>1</sup> 3055, 1729, 1585, 1489, 1369, 1217.

**f) Conversion of -OTf to diphenylphosphine oxide**

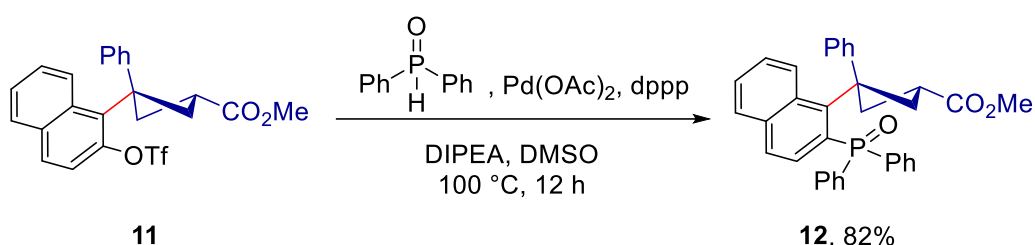

Compound **12** was synthesized following the literature procedure.<sup>11</sup> A solution of Pd(OAc)<sub>2</sub> (2 mg, 10 mol%), dppp (4 mg, 10 mol%) in DMSO (0.5 mL) was vigorously stirred at room temperature for 30 min under Ar atmosphere. Then **11** (0.050 g, 0.1 mmol), DIPEA (0.052 g, 4.0 equiv) and diphenylphosphine oxide (0.045 g, 0.22 mmol) were added sequentially before heating at 100 °C in an oil bath for 12 h. The reaction was removed to room temperature and quenched by water, extracted with EtOAc. The combined organic layers were dried over anhydrous Na<sub>2</sub>SO<sub>4</sub>, filtered and concentrated in vacuo and the residue was purified by chromatography on a silica gel column eluted with hexane/EtOAc (1:1) to afford **12** as a colorless oil (0.042 g, 82% yield).

**R<sub>f</sub>** (Pet. ether /EtOAc = 70/30): 0.12; **<sup>1</sup>H NMR (400 MHz, CDCl<sub>3</sub>)** δ 7.94-7.89 (m, 2H), 7.79 (d, *J* = 8.2 Hz, 1H), 7.65-7.54 (m, 7H), 7.48-7.22 (m, 11H), 3.44-3.20 (m, 4H), 3.38 (s, 3H), 2.90-2.87 (m, 1H). **<sup>13</sup>C NMR (100 MHz, CDCl<sub>3</sub>)** δ 175.6, 155.6 (d, *J* = 5.3 Hz), 148.2, 137.3 (d, *J* = 107.0 Hz), 135.4 (d, *J* = 2.5 Hz), 133.6 (d, *J* = 99.4 Hz), 132.2 (d, *J* = 9.8 Hz), 132.1 (d, *J* = 11.8 Hz), 131.86 (d, *J* = 9.2 Hz), 131.84 (d, *J* = 3.8 Hz), 131.3 (d, *J* = 2.8 Hz), 130.2 (d, *J* = 14.2 Hz), 128.8 (d, *J* = 11.9 Hz), 128.6, 128.4 (d, *J* = 11.9 Hz), 127.6 (d, *J* = 41.0 Hz), 126.7, 126.1 (d, *J* = 16.1 Hz), 125.7 (d, *J* = 13.3 Hz), 51.6, 49.1 (d, *J* = 3.6 Hz), 44.0 (d, *J* = 45.9 Hz),

<sup>11</sup> J. Zhang, Z. Gao, J. Qian, H. Yang, M. He and G. Jiang, *Org. Lett.*, 2021, **23**, 7814.

33.5.  $^{31}\text{P}$  NMR (162 MHz,  $\text{CDCl}_3$ )  $\delta$  32.8. HRMS (ESI)  $m/z$ :  $[\text{M}+\text{H}]^+$  calcd for  $\text{C}_{34}\text{H}_{30}\text{O}_3\text{P}$  517.1927; found 517.1930. FTIR ( $\text{cm}^{-1}$ )<sup>1</sup> 3055, 2223, 1726, 1436, 1193, 1031.

**g) Allylation of 8**

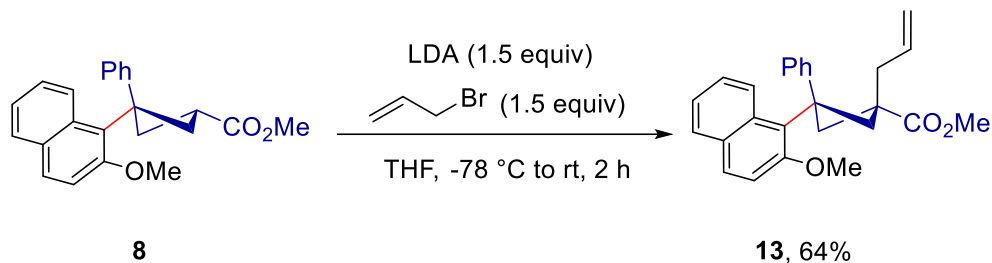

Compound **13** was synthesized following the literature procedure.<sup>12</sup> To a  $-78\text{ }^{\circ}\text{C}$  solution of **8** (0.052 g, 0.15 mmol) in THF (1.0 mL), was slowly added LDA (0.11 mL, 1.5 equiv (2M in THF)). The reaction mixture was stirred for 30 min. Allyl bromide (0.027 g, 1.5 equiv) was then added dropwise into the reaction mixture. The reaction mixture was then warmed naturally to room temperature and stirred for 1.5 h. The reaction mixture was quenched by the addition of saturated aq.  $\text{NH}_4\text{Cl}$  and extracted with  $\text{Et}_2\text{O}$  three times. The combined organic layers were dried over anhydrous  $\text{Na}_2\text{SO}_4$ , filtered and concentrated in vacuo and the residue was purified by chromatography on a silica gel column eluted with hexane/ $\text{EtOAc}$  (9:1) to afford **13** as a colorless oil (0.037 g, 64% yield).

$R_f$  (Pet. ether / $\text{EtOAc}$  = 90/10): 0.27;  $^1\text{H}$  NMR (400 MHz,  $\text{CDCl}_3$ )  $\delta$  7.83 (d,  $J$  = 8.9 Hz, 1H), 7.78-7.73 (m, 2H), 7.66 (d,  $J$  = 7.9 Hz, 2H), 7.39 (t,  $J$  = 8.4 Hz, 1H), 7.31-7.22 (m, 4H), 7.11 (t,  $J$  = 7.3 Hz, 1H), 5.69-5.58 (m, 1H), 4.97-4.93 (m, 2H), 3.99 (s, 3H), 3.70 (bs, 2H), 3.52 (s, 3H), 2.99 (bs, 2H), 2.37 (d,  $J$  = 7.3 Hz, 2H).  $^{13}\text{C}$  NMR (100 MHz,  $\text{CDCl}_3$ )  $\delta$  177.4, 154.2, 147.1, 133.5, 131.9, 130.4, 129.9, 128.9, 128.8, 128.1, 126.9, 125.9, 125.8, 125.2, 123.1, 117.5, 114.4, 56.2, 51.8, 45.6, 45.2, 44.5. HRMS (ESI)  $m/z$ :  $[\text{M}+\text{Na}]^+$  calcd for  $\text{C}_{26}\text{H}_{26}\text{NaO}_3$  409.1774; found 409.1783. FTIR ( $\text{cm}^{-1}$ )<sup>1</sup> 2190, 2129, 1696, 1212, 1083.

**h) Amidation of 8**

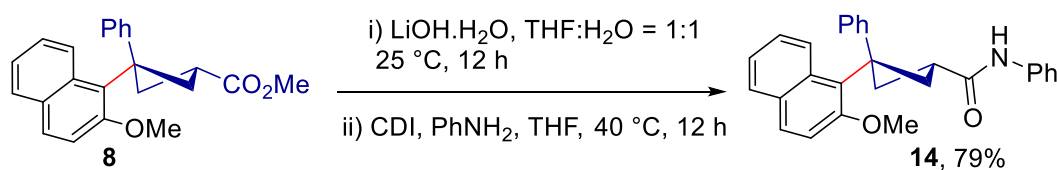

<sup>12</sup> X. He, Y. Zhao, Z. Zhang and X. Shen, *Org. Lett.*, 2022, **24**, 1991.

Methyl-3-(2-methoxynaphthalen-1-yl)-3-phenylcyclobutane-1-carboxylate **8** (0.069 g, 0.15 mmol) and lithium hydroxide monohydrate (0.017 g, 0.4 mmol) were dissolved in THF:H<sub>2</sub>O (1+1 mL) at 25 °C and stirred for 12 h. The mixture was then concentrated under reduced pressure. The resulting residue was dissolved in water (5 mL) and acidified with 1 M HCl to adjust the pH to 4-6. Once the solution reached the desired pH range, the aqueous phase was extracted with DCM (5 mL). The organic layer was dried using anhydrous Na<sub>2</sub>SO<sub>4</sub> and concentrated under reduced pressure to furnish the acid derivative. The acid derivative was used directly for the next step without purification.

Compound **14** was synthesized following the literature procedure.<sup>13</sup> Carbonyldiimidazole (0.036 g, 0.22 mmol) was added to the solution of the acid derivative (0.2 mmol) in THF (1.0 mL), and the solution was stirred at 40 °C for 2 h. The reaction mixture was cooled to rt, aniline (0.020 g, 0.22 mmol) was added, and the reaction mixture was stirred at 40 °C for 10 h. The obtained mixture was concentrated under vacuum, the residue was dissolved in CH<sub>2</sub>Cl<sub>2</sub>, washed with 5% aq HCl, NaHCO<sub>3</sub>, and brine. The combined organic layers were dried over anhydrous Na<sub>2</sub>SO<sub>4</sub>, filtered and concentrated in vacuo and the residue was purified by chromatography on a silica gel column eluted with hexane/EtOAc (5:1) to afford **14** as a white solid (0.064 g, 79% yield) (over two steps).

**R<sub>f</sub>** (Pet. ether /EtOAc = 90/10): 0.27; Melting point: 249-251 °C. **<sup>1</sup>H NMR (400 MHz, CDCl<sub>3</sub>)** δ 7.77-7.67 (m, 5H), 7.48 (d, *J* = 7.8 Hz, 2H), 7.37-7.26 (m, 7H), 7.21-7.19 (m, 2H), 7.07 (t, *J* = 7.3 Hz, 1H), 3.96 (s, 3H), 3.31-3.21 (m, 5H). **<sup>13</sup>C NMR (100 MHz, CDCl<sub>3</sub>)** δ 172.8, 154.3, 146.9, 138.1, 132.0, 129.9, 129.8, 129.1, 128.9, 128.8, 128.5, 126.6, 126.2, 125.9, 124.7, 124.2, 123.1, 119.7, 114.2, 56.2, 46.2, 40.7, 37.5. **HRMS (ESI)** *m/z*: [M+Na]<sup>+</sup> calcd for C<sub>28</sub>H<sub>25</sub>NNaO<sub>2</sub> 430.1778; found 430.1783. **FTIR (cm<sup>-1</sup>)**<sup>1</sup> 3246, 2124, 1976, 1651, 1499, 1253.

#### i) Thioamide formation of **14**

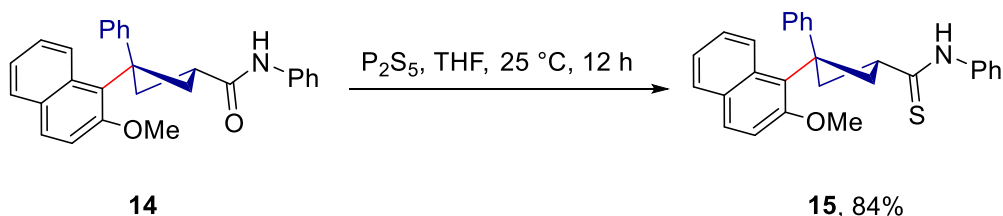

<sup>13</sup> . V. Chernykh, K. P. Melnykov, N. A. Tolmacheva, I. S. Kondratov, D. S. Radchenko, C. G. Daniliuc, D. M. Volochnyuk, S. V. Ryabukhin, Y. O. Kuchkovska, and O. O. Grygorenko, *J. Org. Chem.*, 2019, **84**, 8487.

Compound **15** was synthesized following the literature procedure.<sup>14</sup> Compound **15** (0.043 g, 0.1 mmol) and P<sub>2</sub>S<sub>5</sub> (0.111 g, 0.25 mmol) were dissolved in THF (2.0 mL) under argon atmosphere and stirred for 12 h at 25 °C. After 12 h, the solvent was evaporated, and the crude residue was pre-adsorbed on silica gel and purified by flash column chromatography on silica gel (Pet. ether /EtOAc = 90/10) to afford **15** as a sticky solid (0.036 g, 84% yield). *R<sub>f</sub>* (Pet. ether /EtOAc = 90/10): 0.29; <sup>1</sup>H NMR (400 MHz, CDCl<sub>3</sub>) δ 8.56 (s, 1H), 7.85 (d, *J* = 9.0 Hz, 1H), 7.78-7.74 (m, 4H), 7.64 (d, *J* = 8.0 Hz, 2H), 7.46-7.29 (m, 7H), 7.26-7.17 (m, 2H), 4.00 (s, 3H), 3.66-3.23 (m, 5H). <sup>13</sup>C NMR (100 MHz, CDCl<sub>3</sub>) δ 207.0, 154.2, 146.7, 138.5, 132.0, 129.9, 129.8, 129.0, 128.9, 128.9, 128.5, 126.9, 126.7, 126.3, 126.0, 124.7, 123.8, 123.2, 114.2, 56.3, 46.0, 45.2. HRMS (ESI) *m/z*: [M+Na]<sup>+</sup> calcd for C<sub>28</sub>H<sub>25</sub>NNaOS 446.1549; found 446.1556. FTIR (cm<sup>-1</sup>)<sup>1</sup> 3243, 2130, 1979, 1932, 1788, 1334.

---

<sup>14</sup> A. Ghosh, S. Barik and A. T. Biju, *Org. Lett.*, 2019, **21**, 8598.

## 11. $^1\text{H}$ and $^{13}\text{C}$ NMR Spectra of Products

### Methyl-3-(2-hydroxynaphthalen-1-yl)-3-phenylcyclobutane-1-carboxylate (3a)

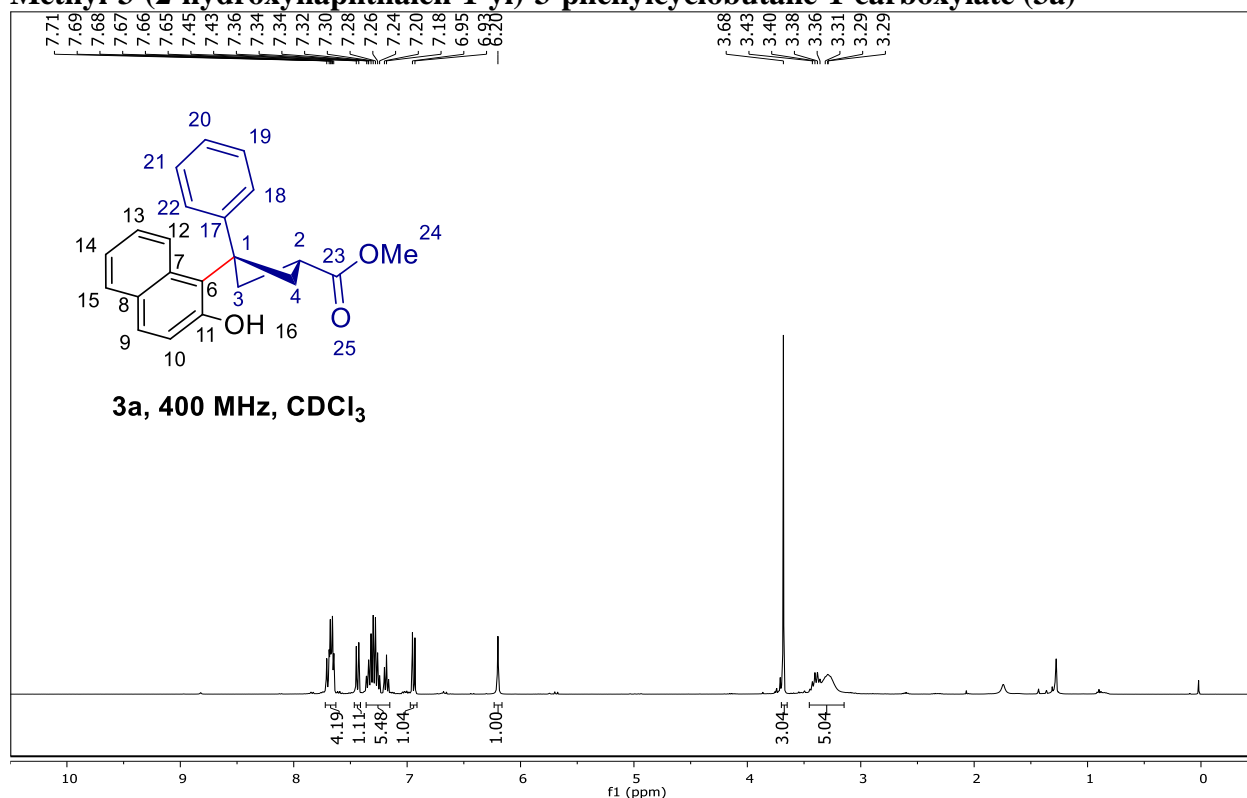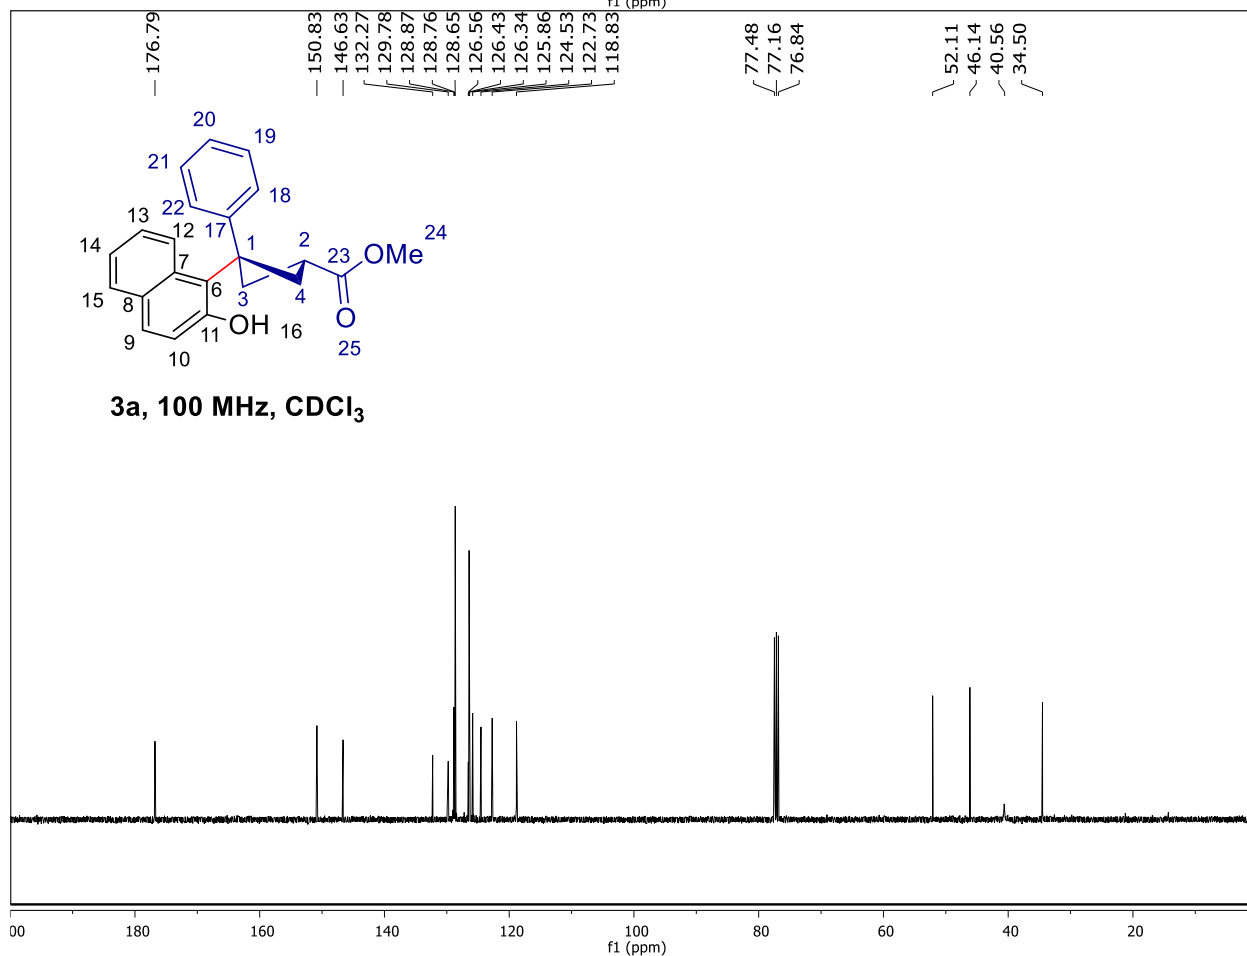

**$^1\text{H}$  COSY (400 MHz,  $\text{CDCl}_3$ )**

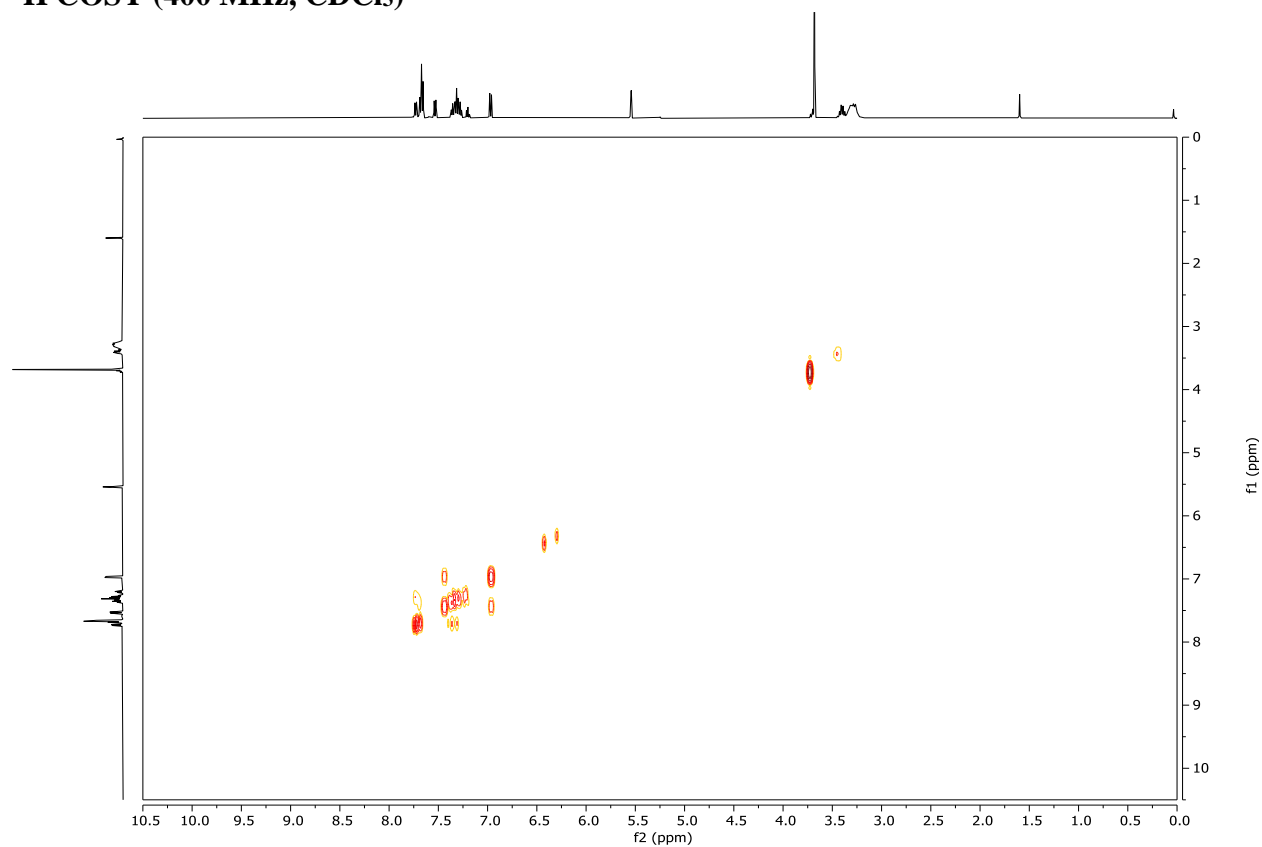

**$^1\text{H}/^{13}\text{C}$  HSQC (400/100 MHz,  $\text{CDCl}_3$ )**

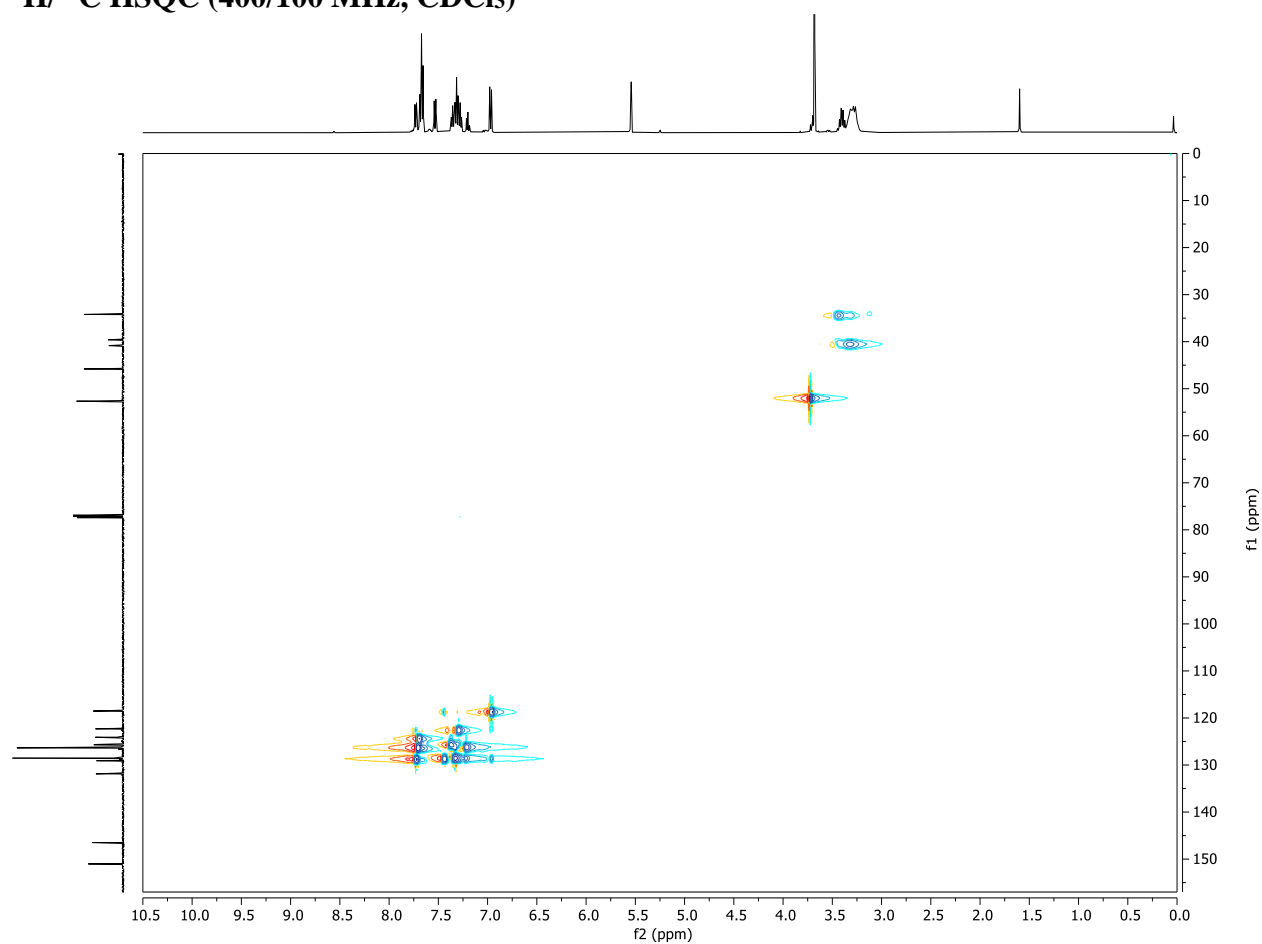

**$^1\text{H}/^{13}\text{C}$  HMBC (400/100 MHz,  $\text{CDCl}_3$ )**

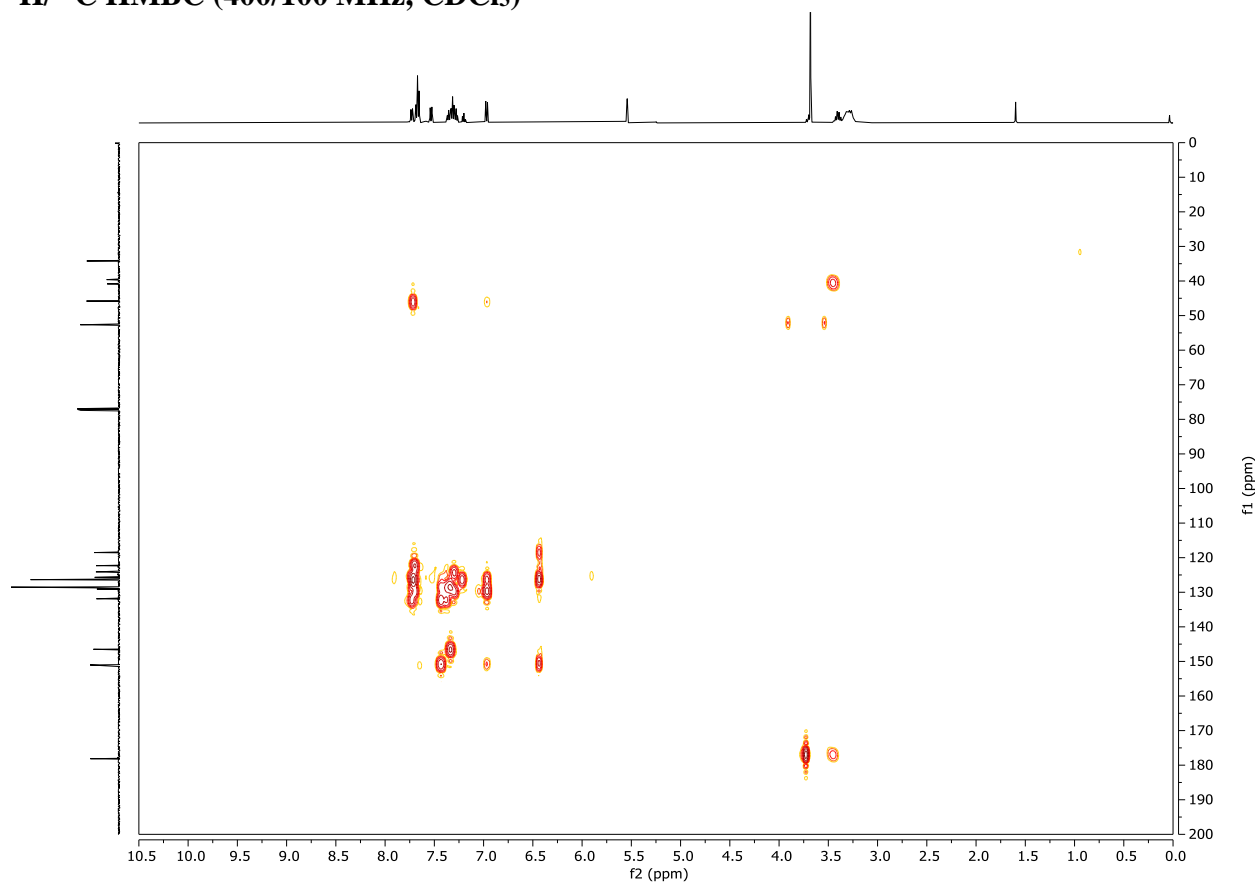

**Methyl-3-(2-hydroxynaphthalen-1-yl)-3-(*p*-tolyl)cyclobutane-1-carboxylate (3b)**

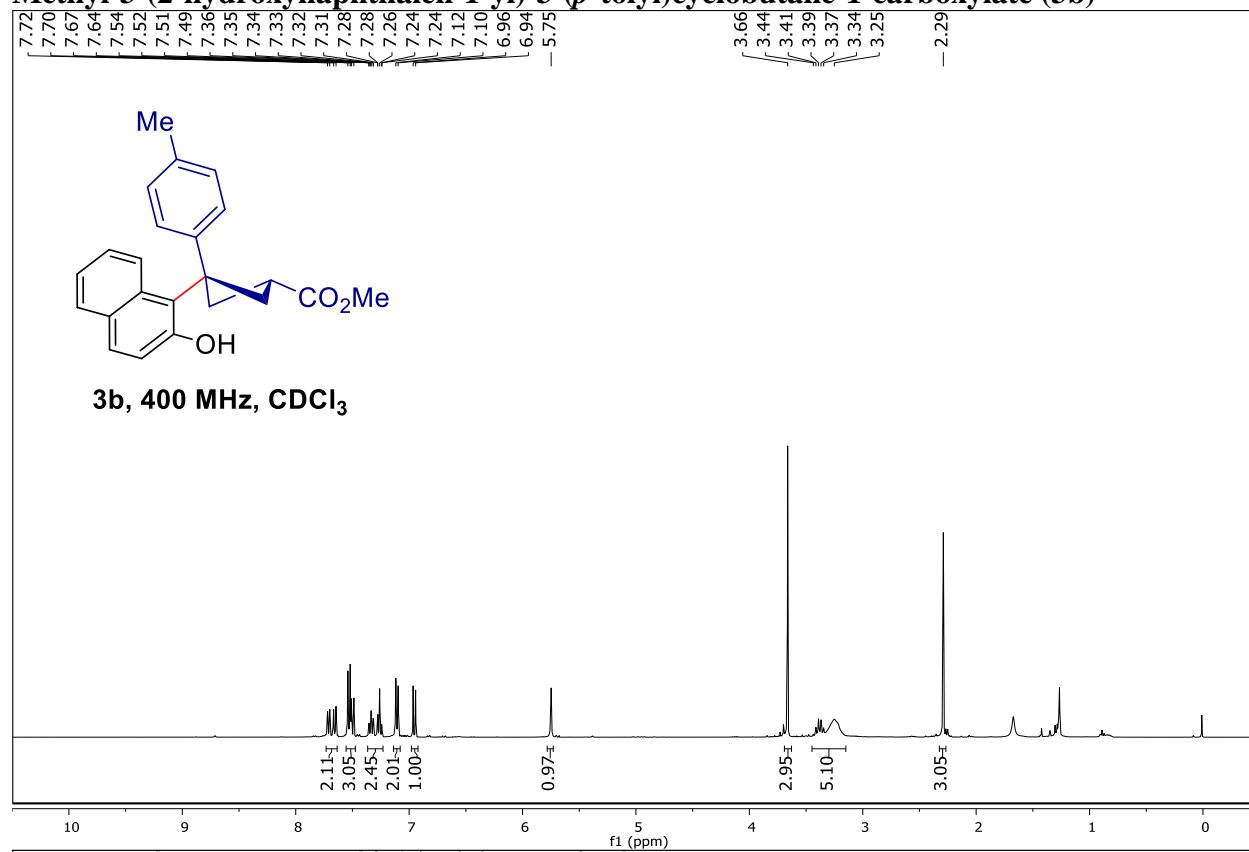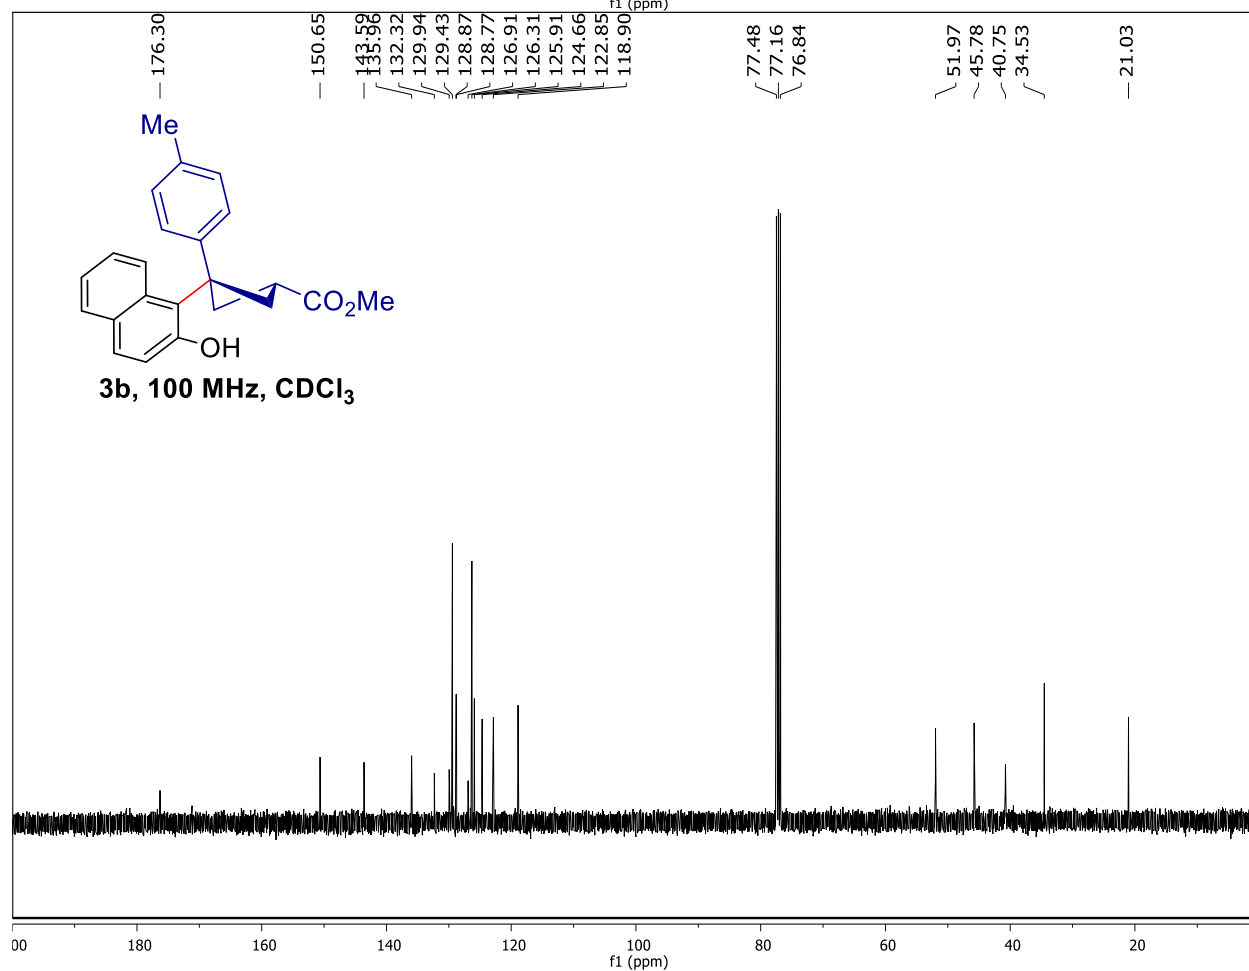

**Methyl-3-(4-bromophenyl)-3-(2-hydroxynaphthalen-1-yl)cyclobutane-1-carboxylate (3c)**

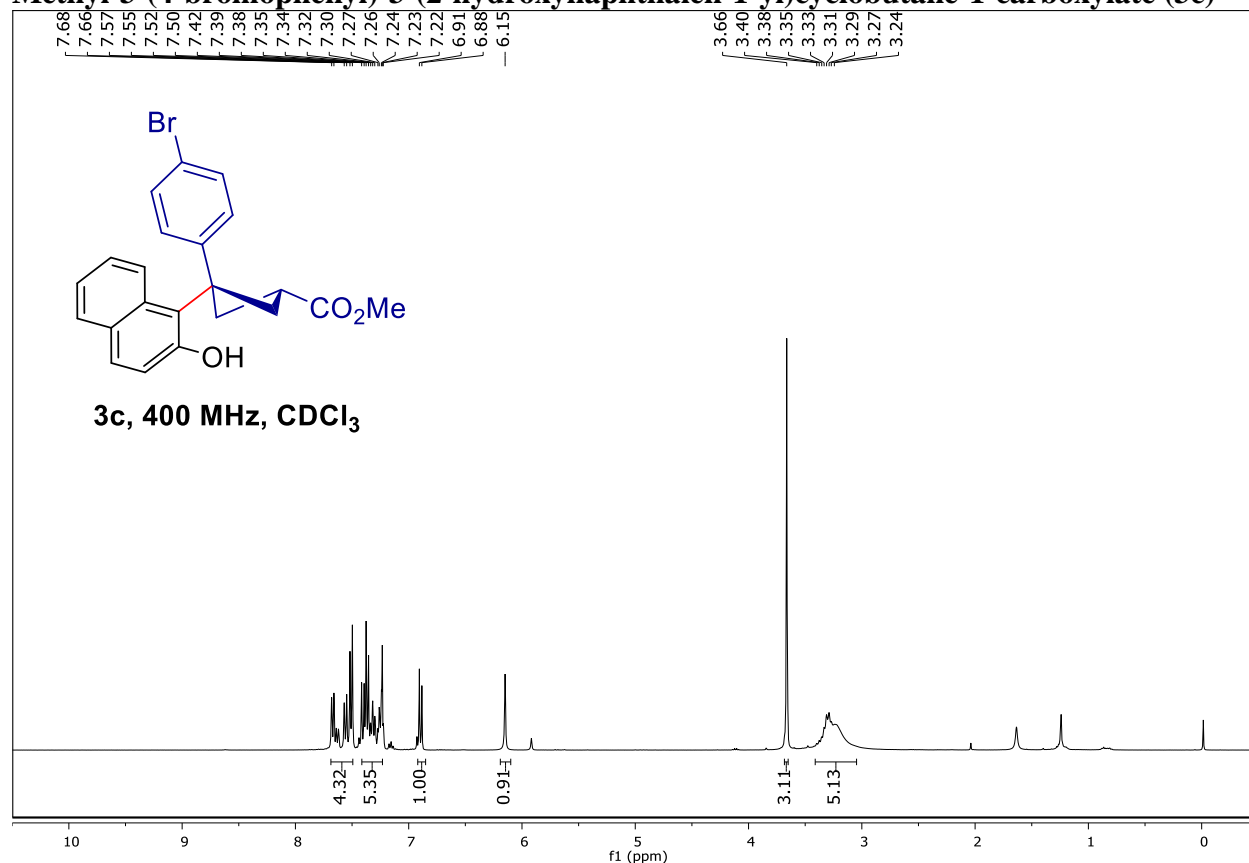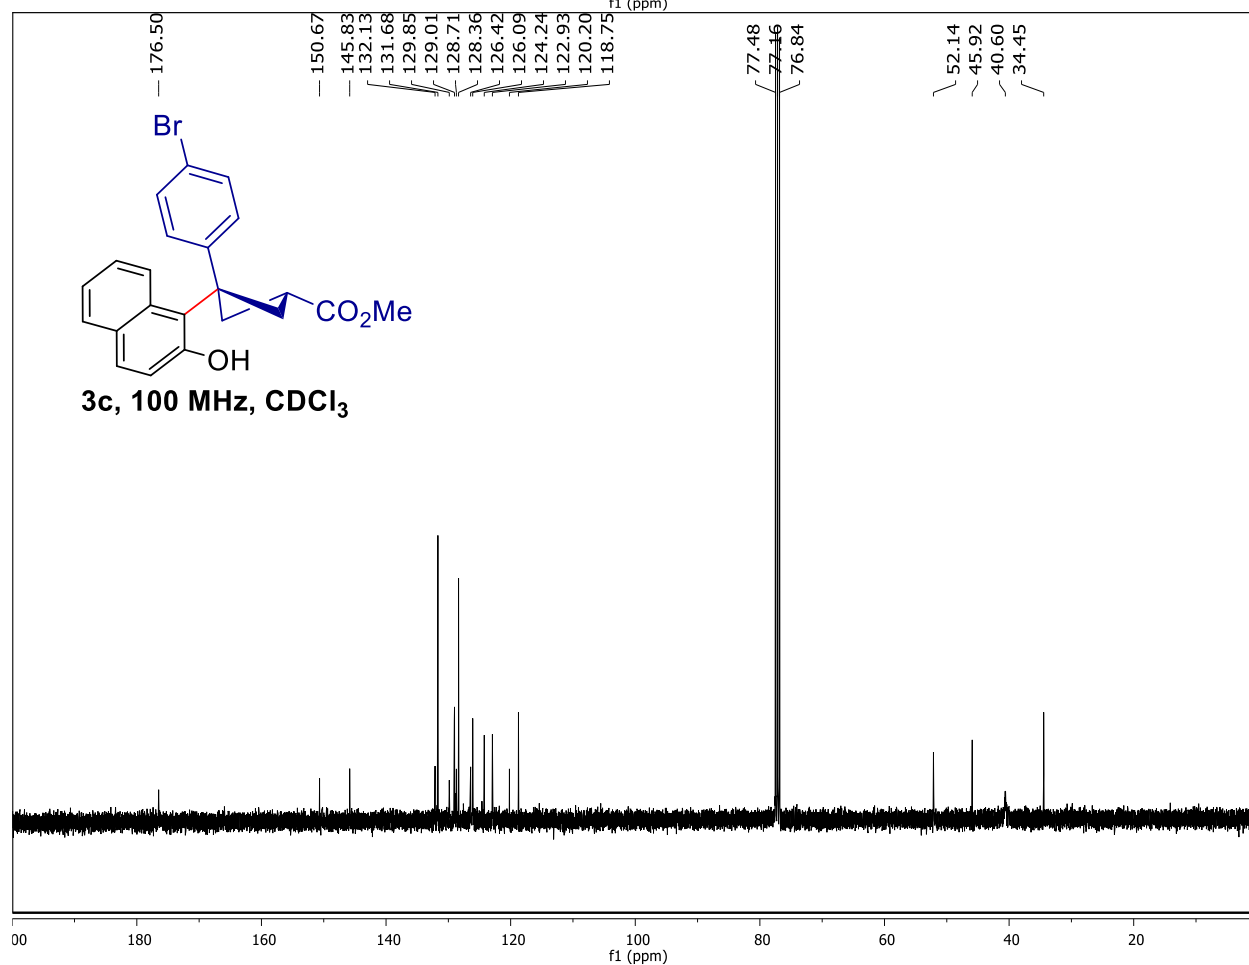

**Methyl-3-(4-chlorophenyl)-3-(2-hydroxynaphthalen-1-yl)cyclobutane-1-carboxylate (3d)**

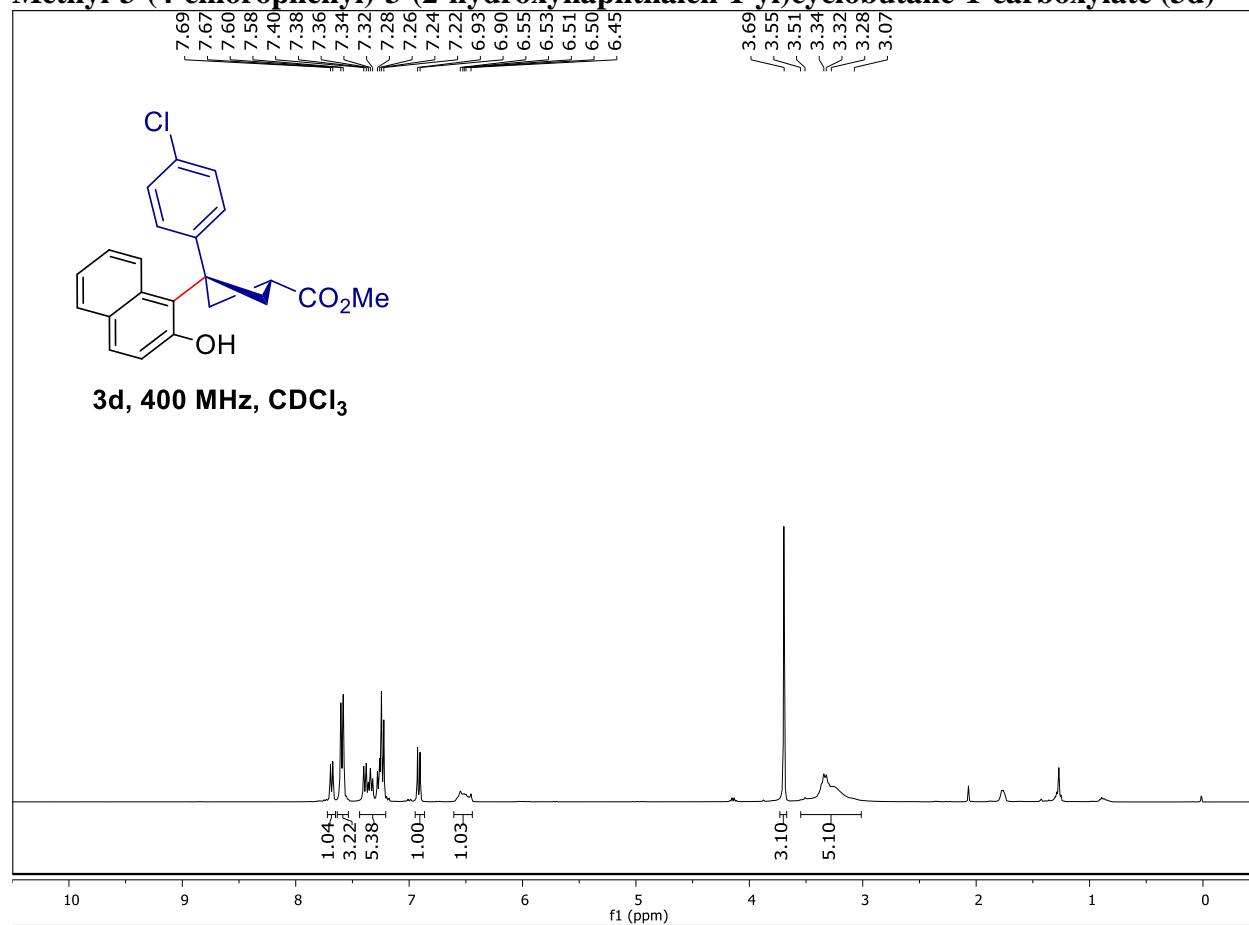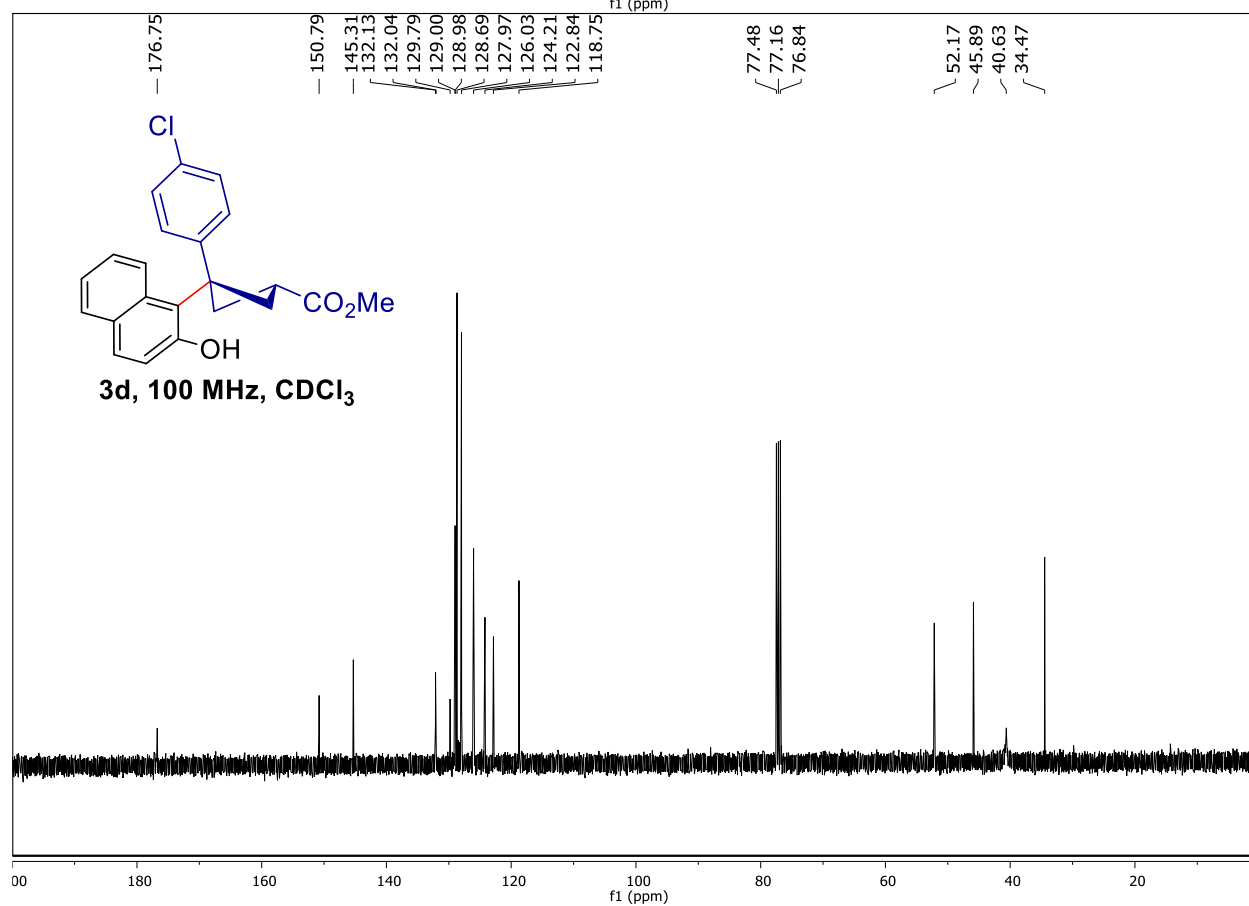

**Methyl-3-(4-fluorophenyl)-3-(2-hydroxynaphthalen-1-yl)cyclobutane-1-carboxylate (3e)**

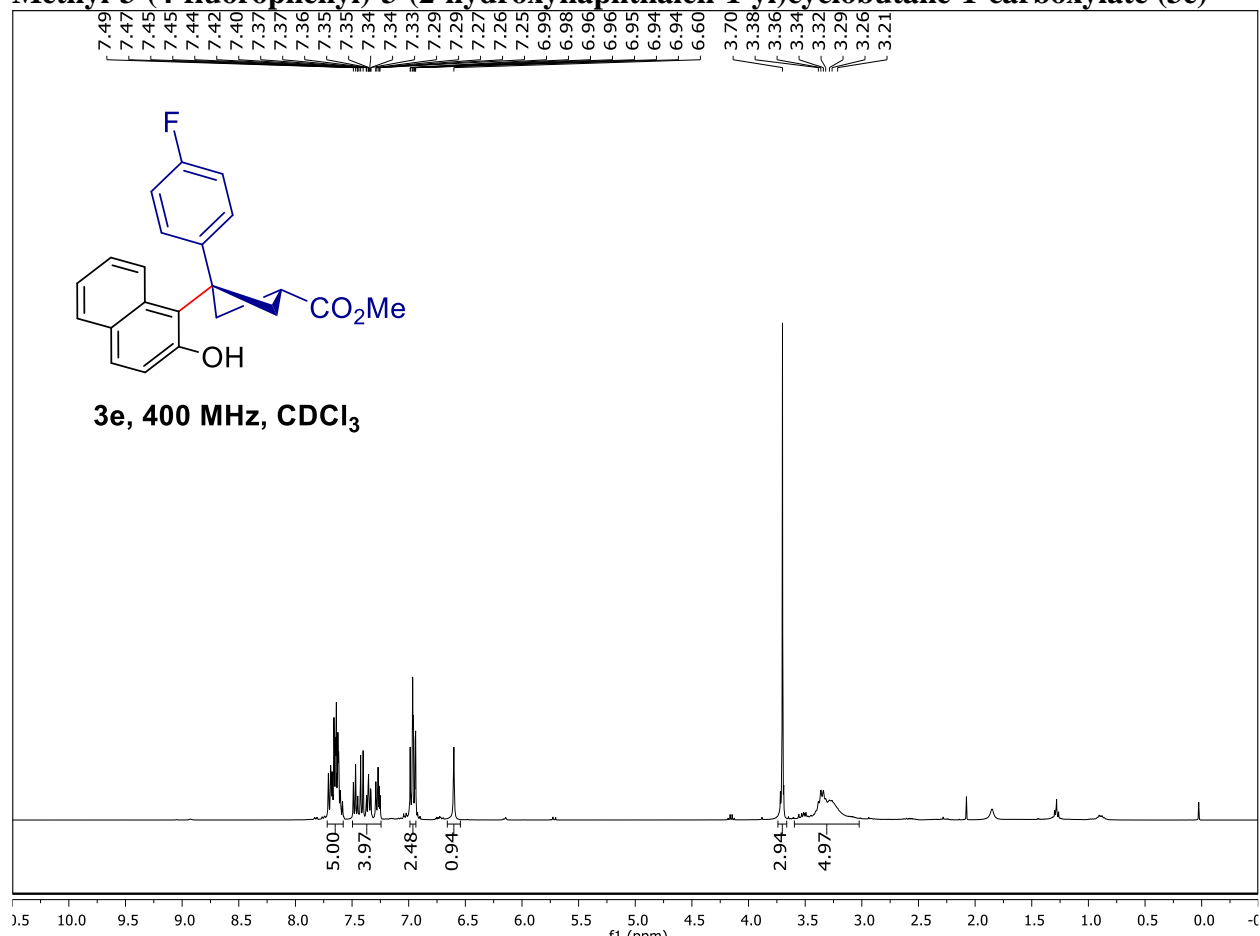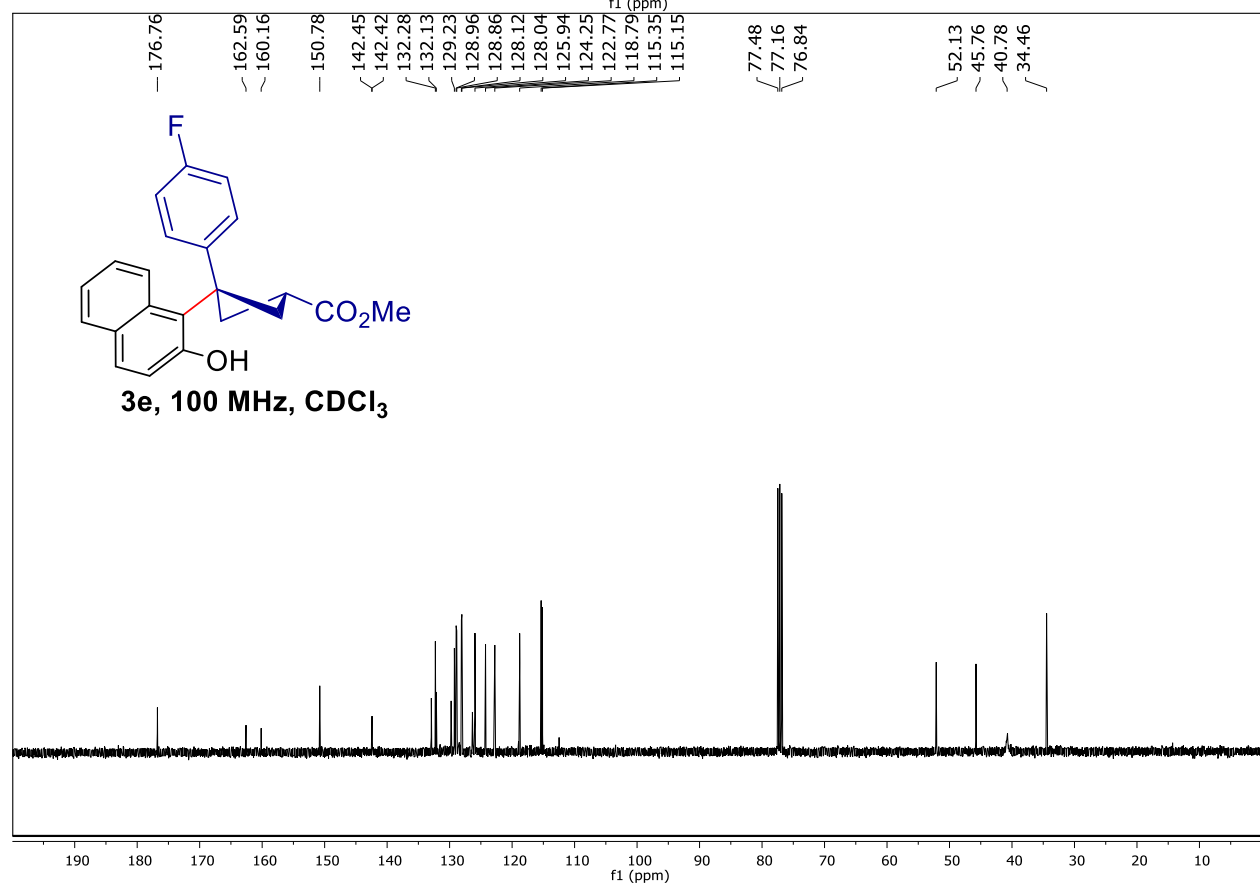

**Methyl-3-(2-hydroxynaphthalen-1-yl)-3-(3-methoxyphenyl)cyclobutane-1-carboxylate (3f)**

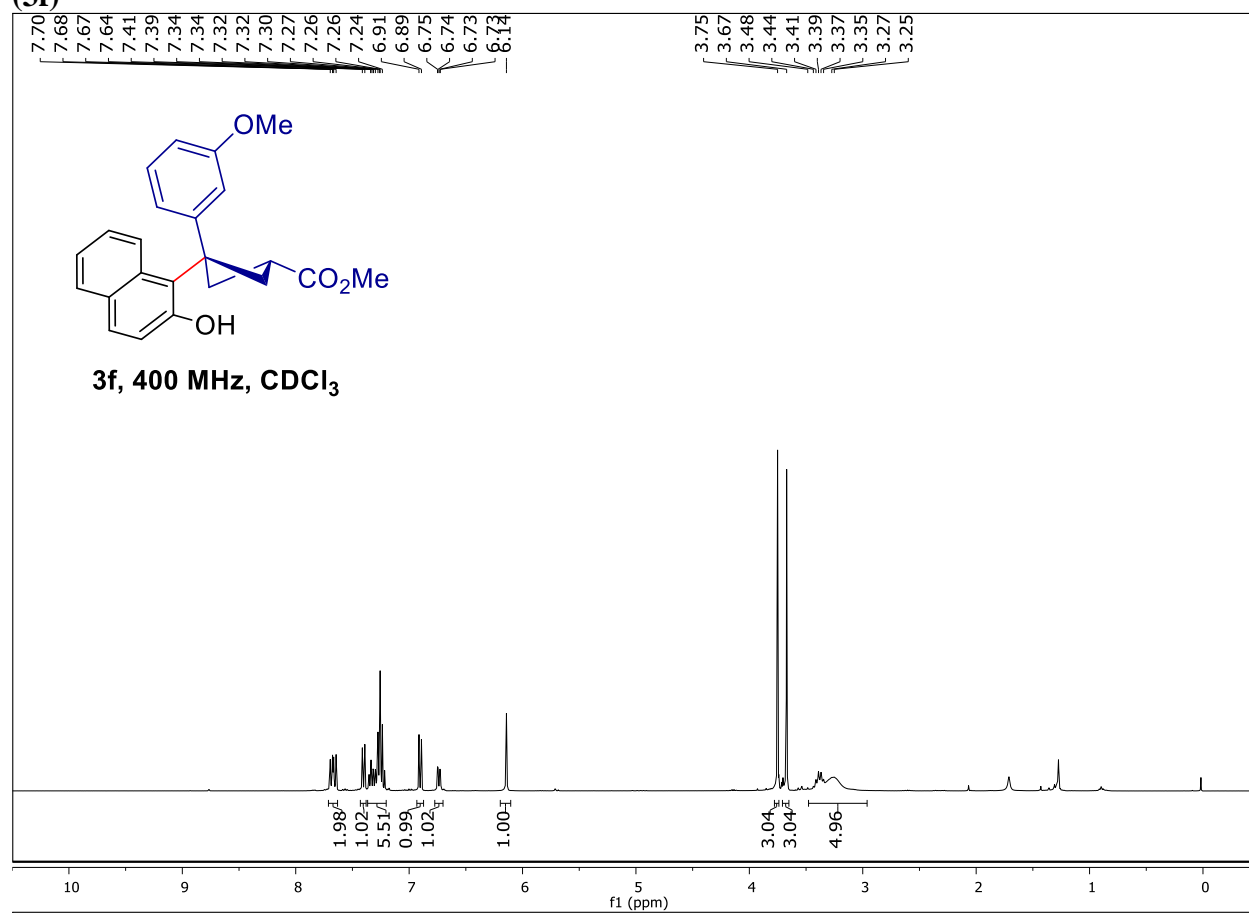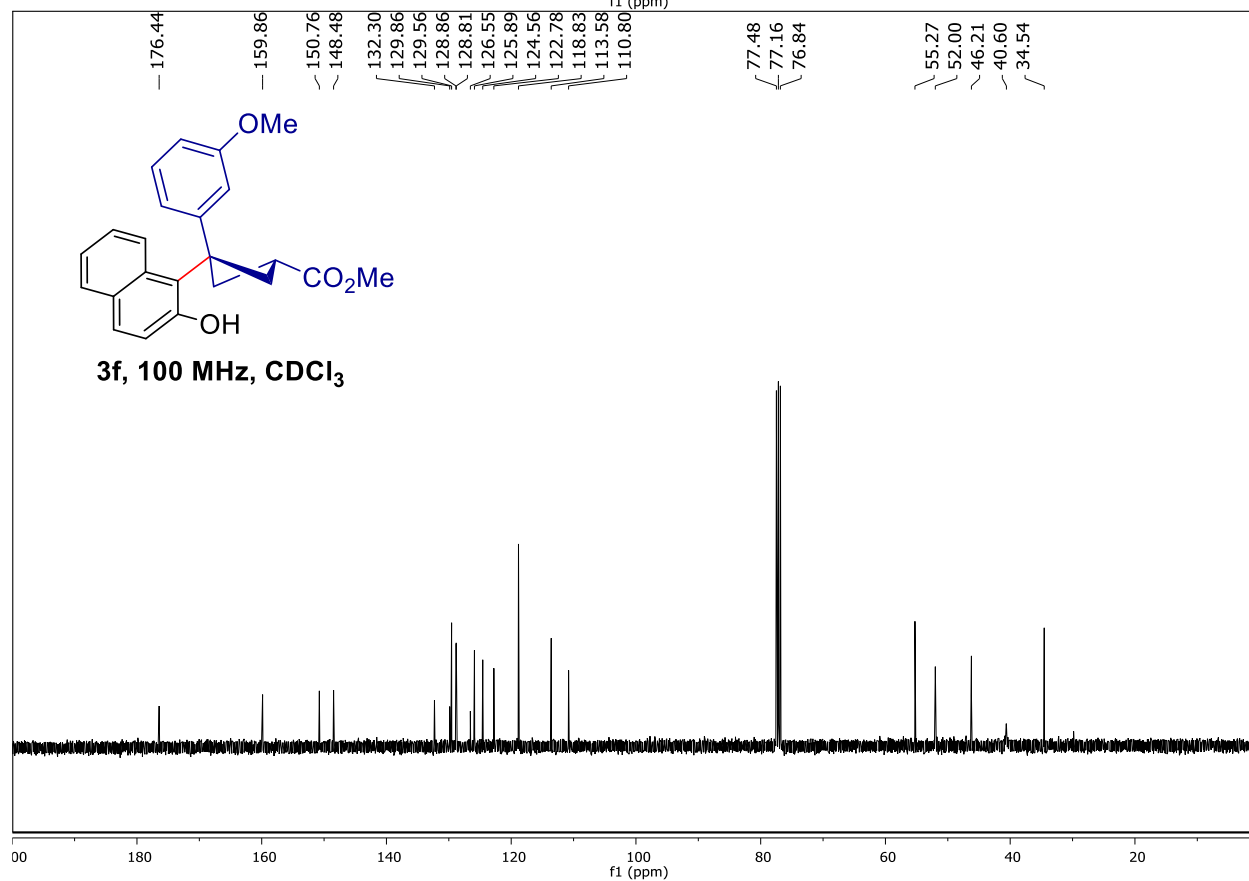

**Methyl-3-(2-hydroxynaphthalen-1-yl)-3-(m-tolyl)cyclobutane-1-carboxylate (3g)**

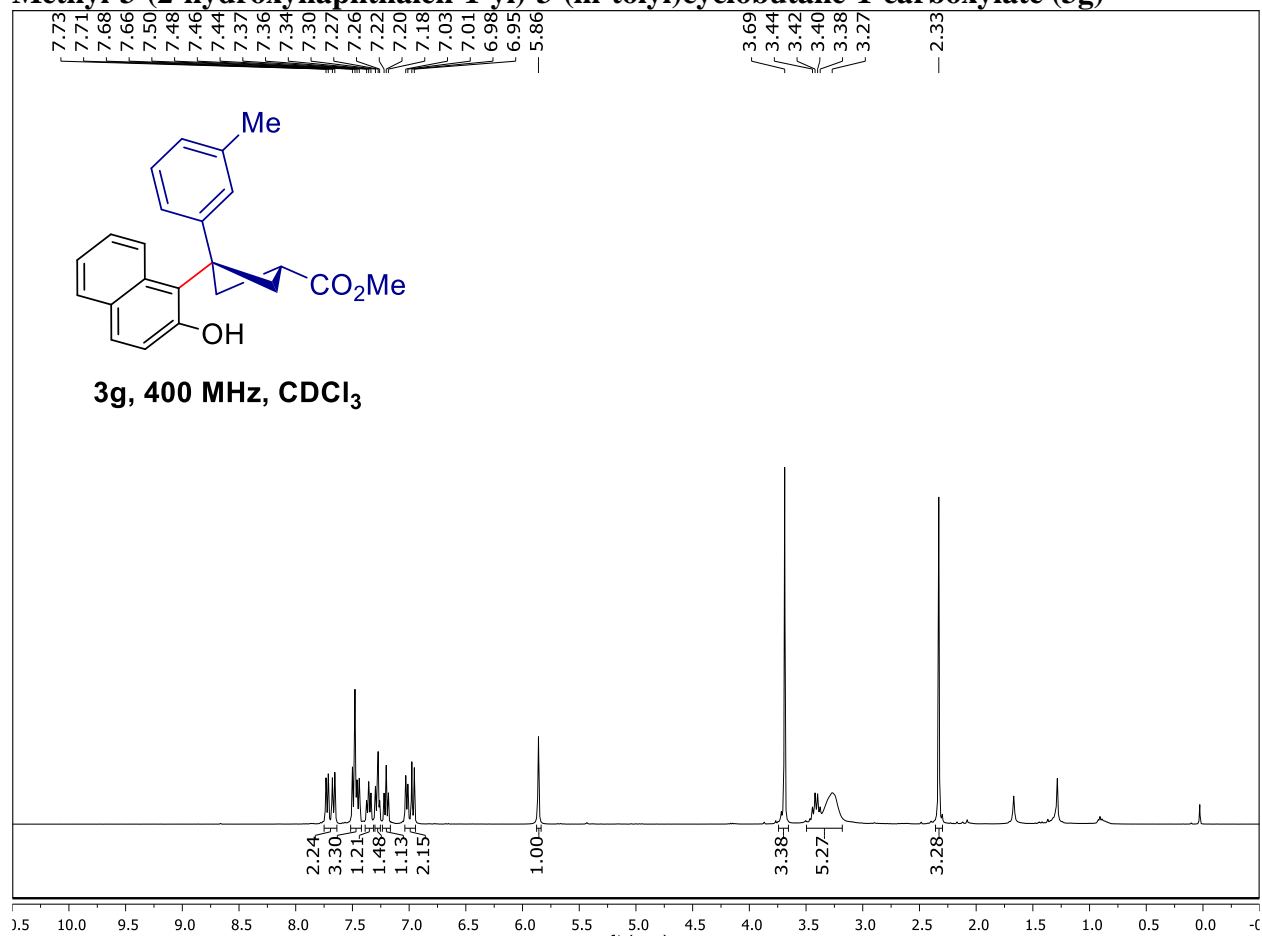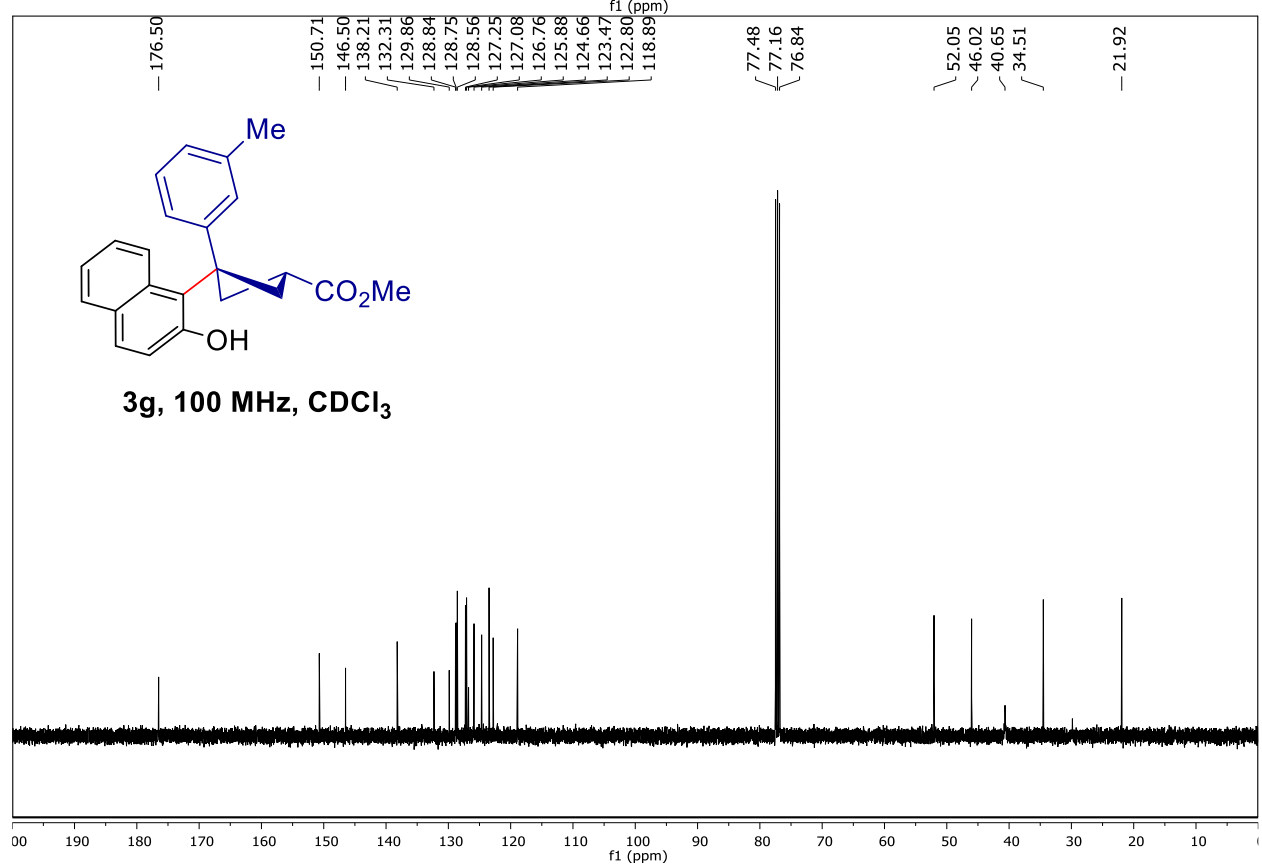

**Benzyl 3-(2-hydroxynaphthalen-1-yl)-3-phenylcyclobutane-1-carboxylate (3h)**

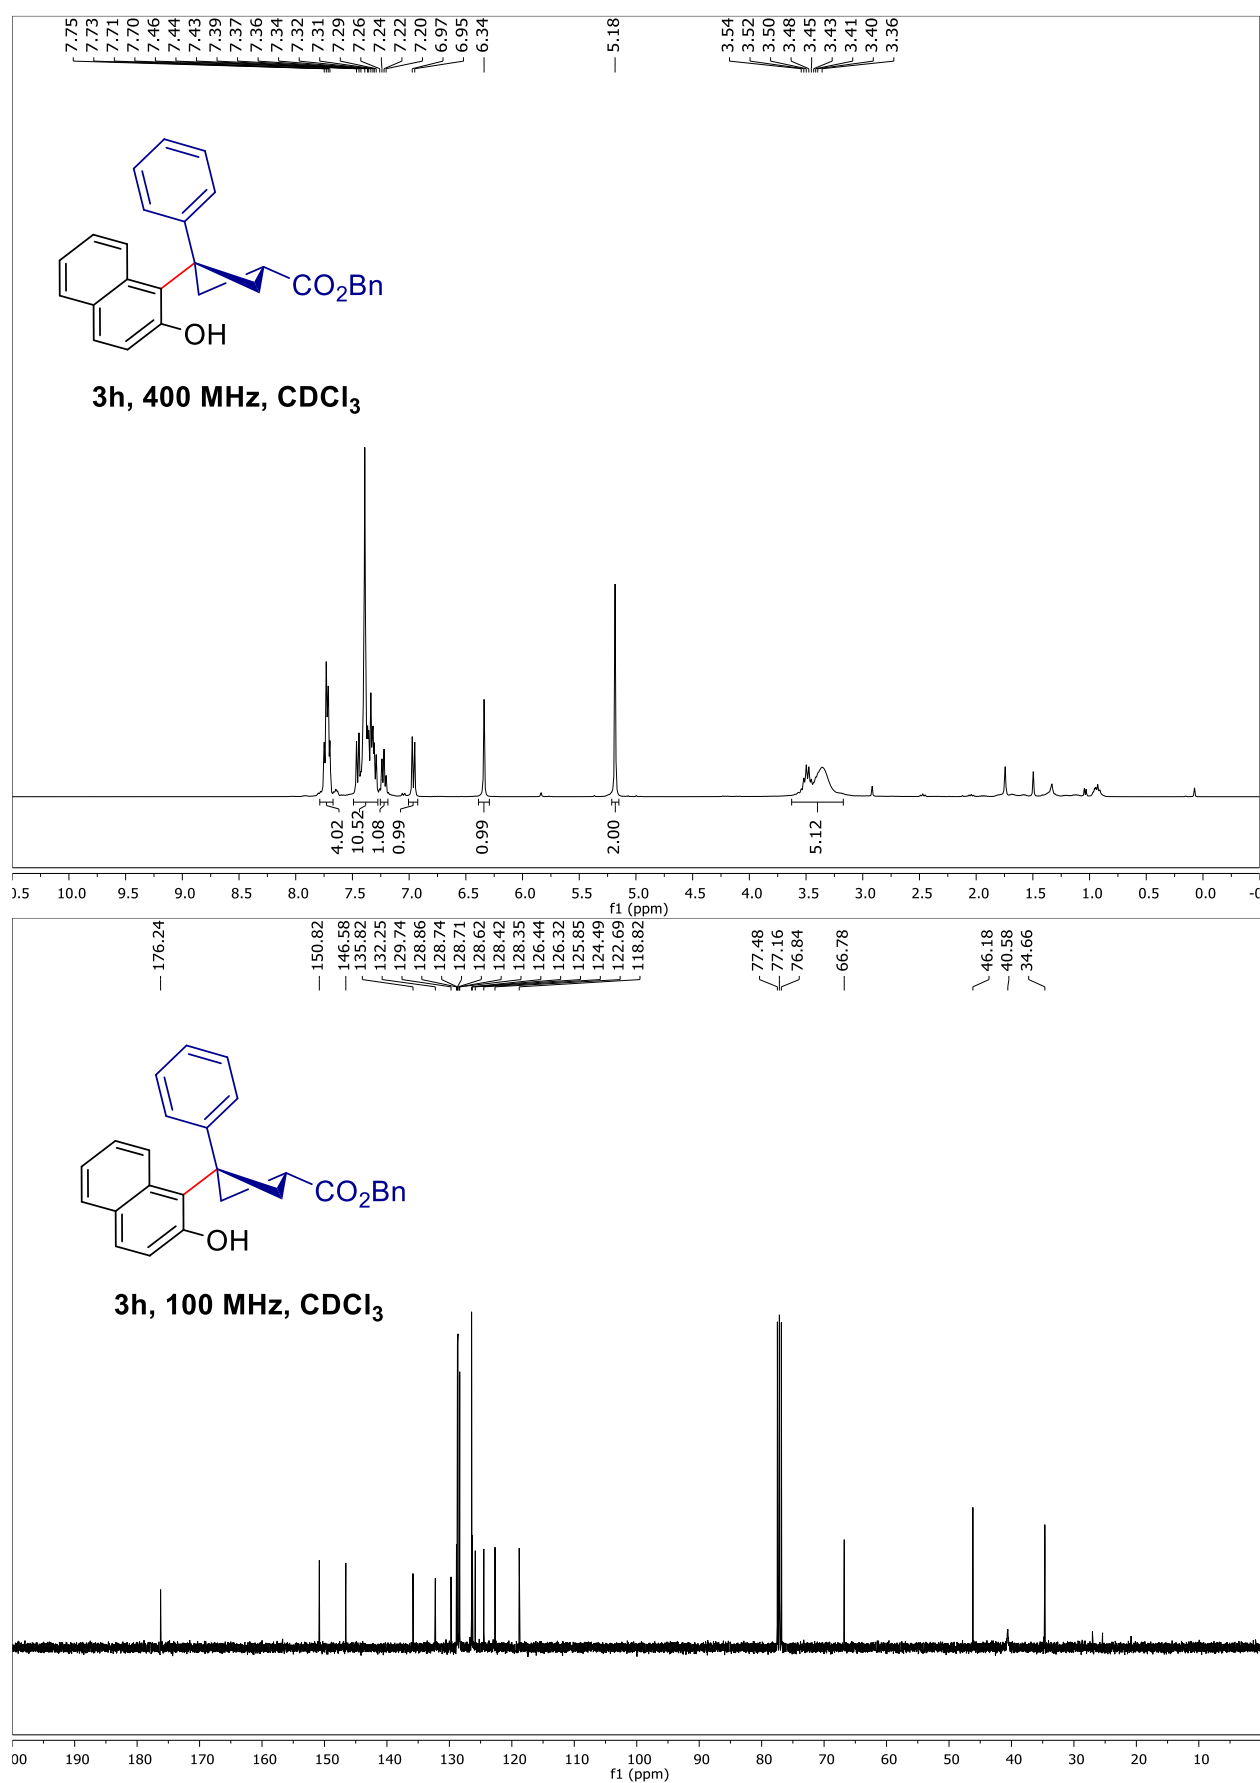

**Isopropyl 3-(2-hydroxynaphthalen-1-yl)-3-phenylcyclobutane-1-carboxylate (3i)**

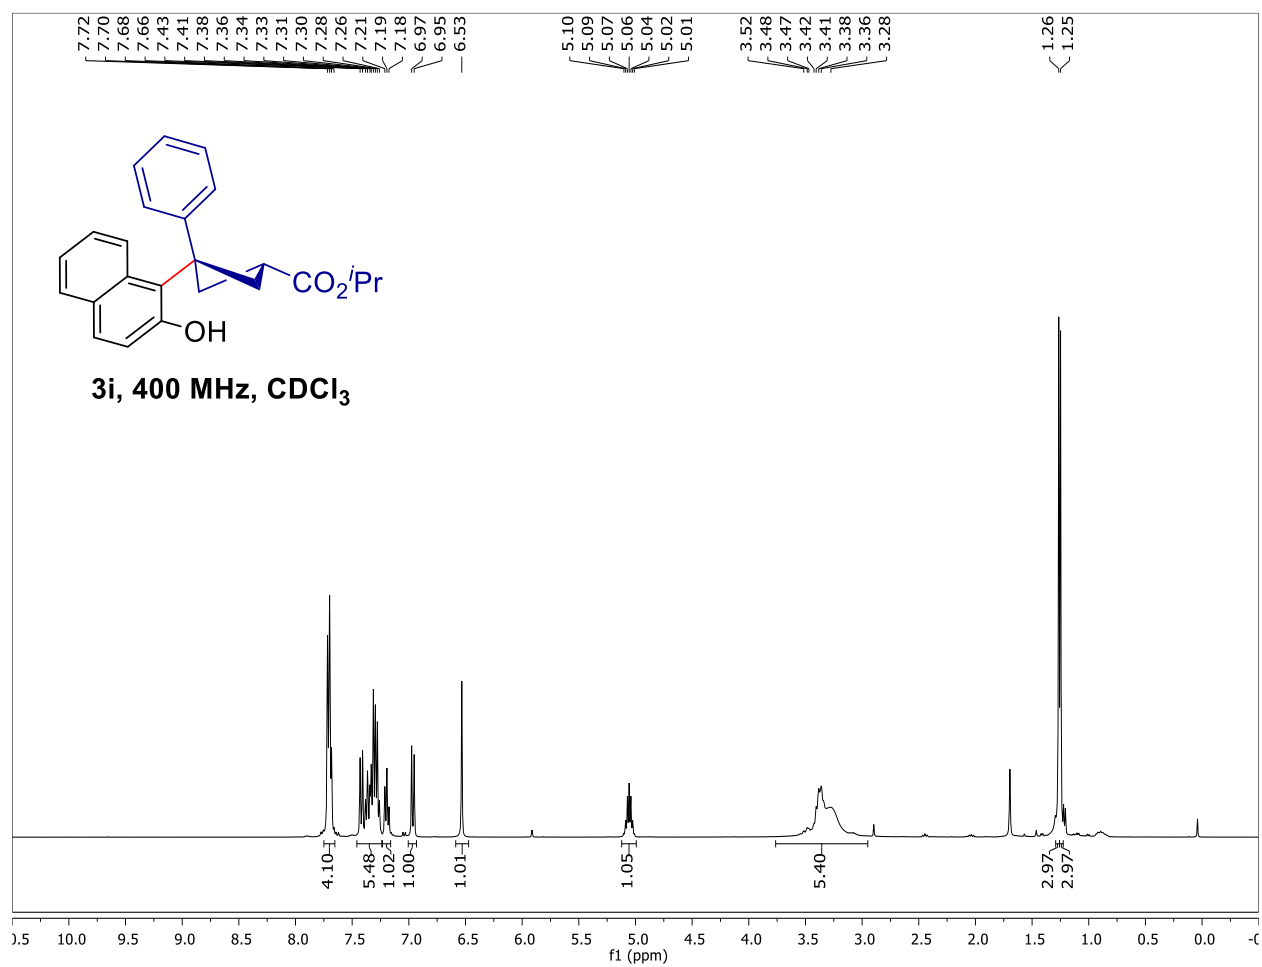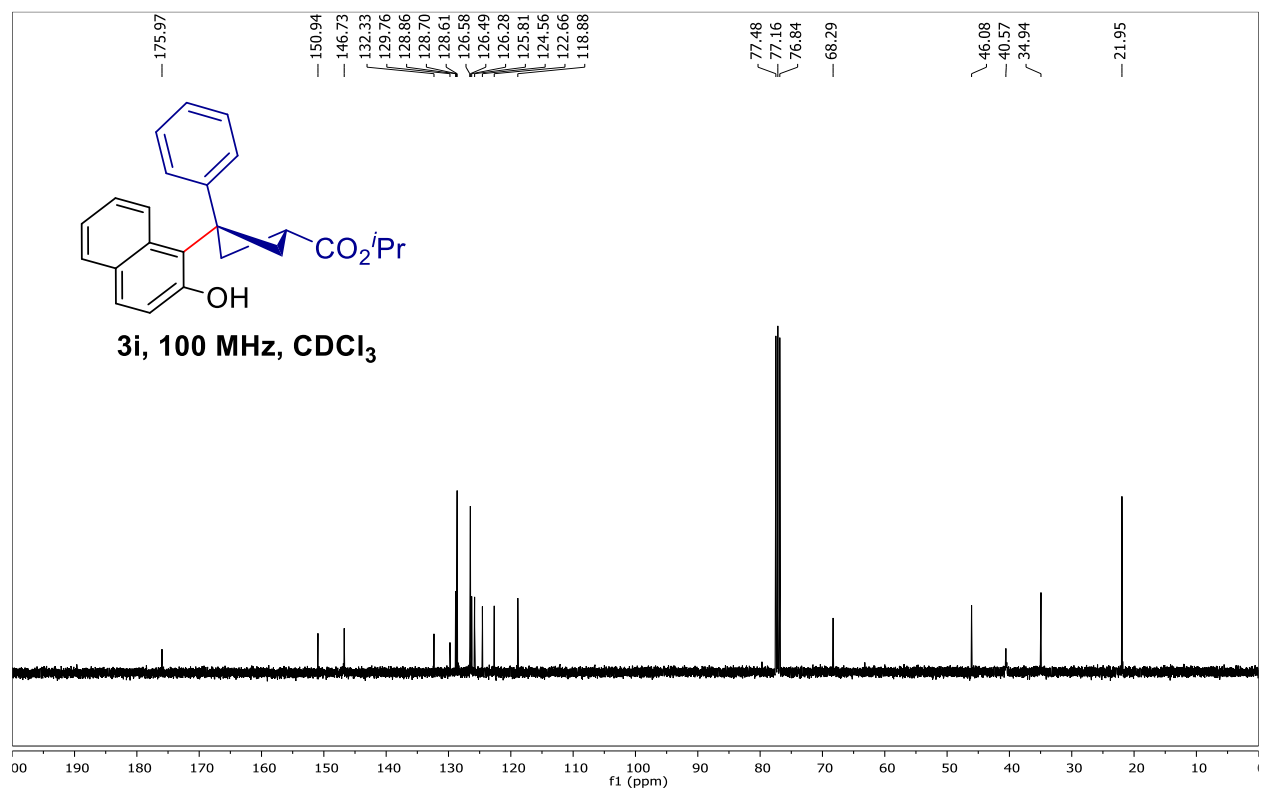

**Methyl-3-(2-hydroxy-7-methoxynaphthalen-1-yl)-3-phenylcyclobutane-1-carboxylate  
(3j)**

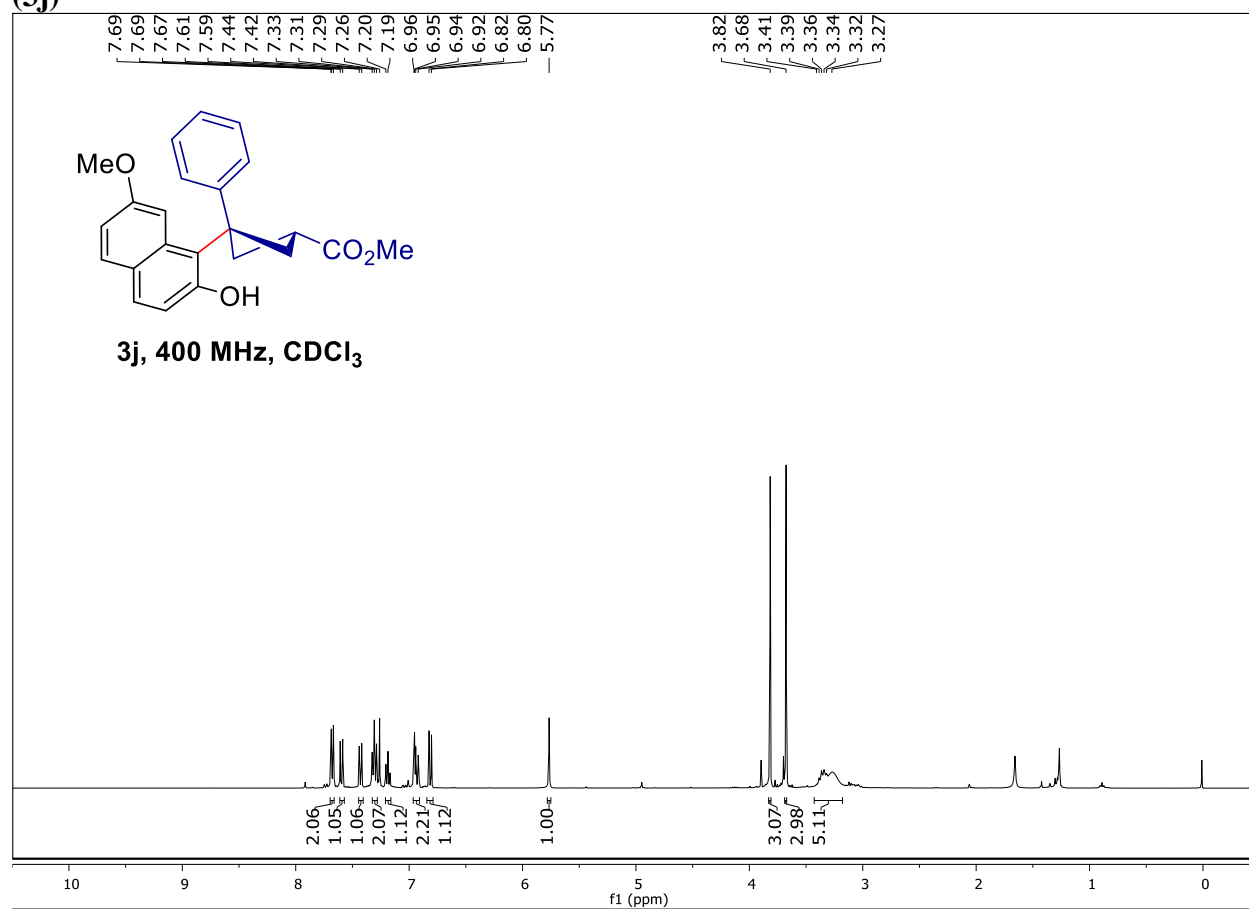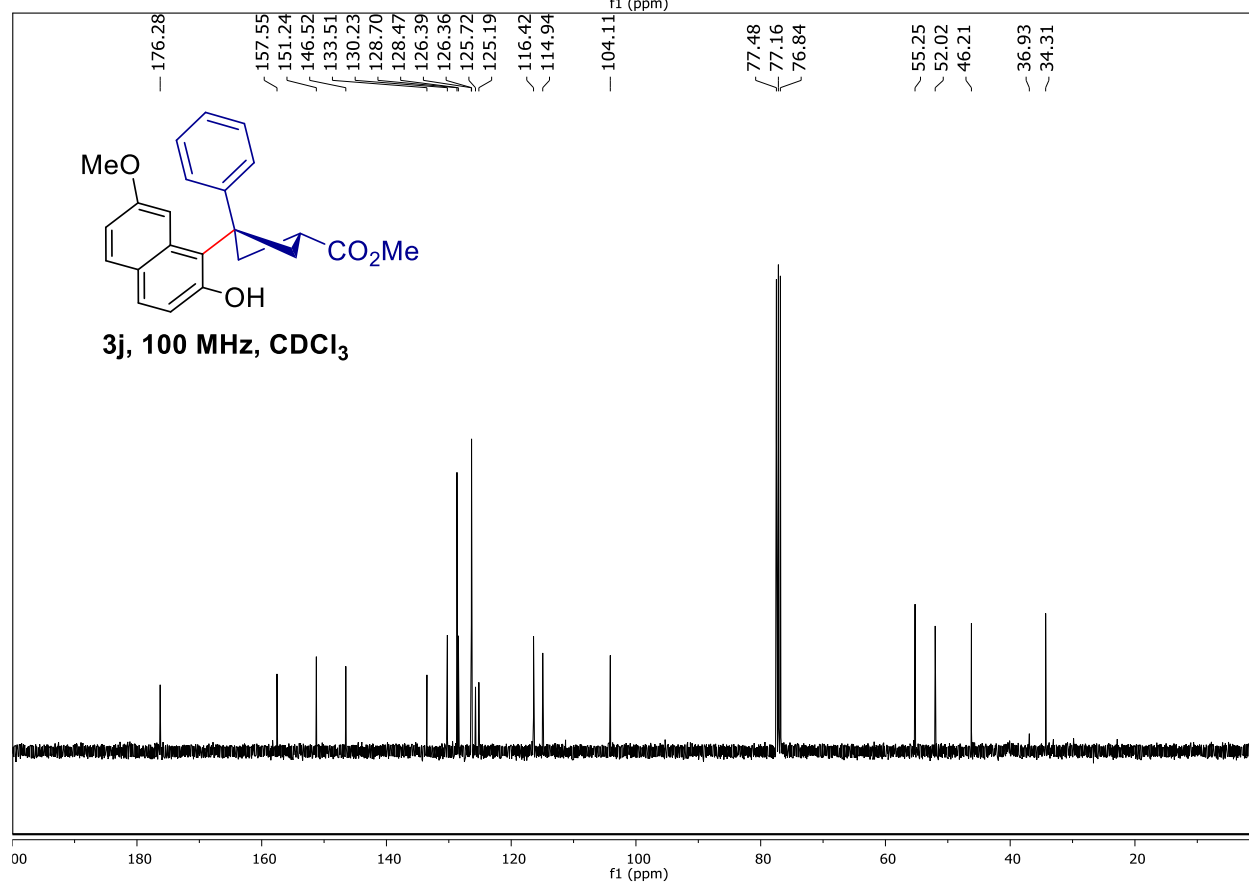

**Methyl-3-(7-bromo-2-hydroxynaphthalen-1-yl)-3-phenylcyclobutane-1-carboxylate (3k)**

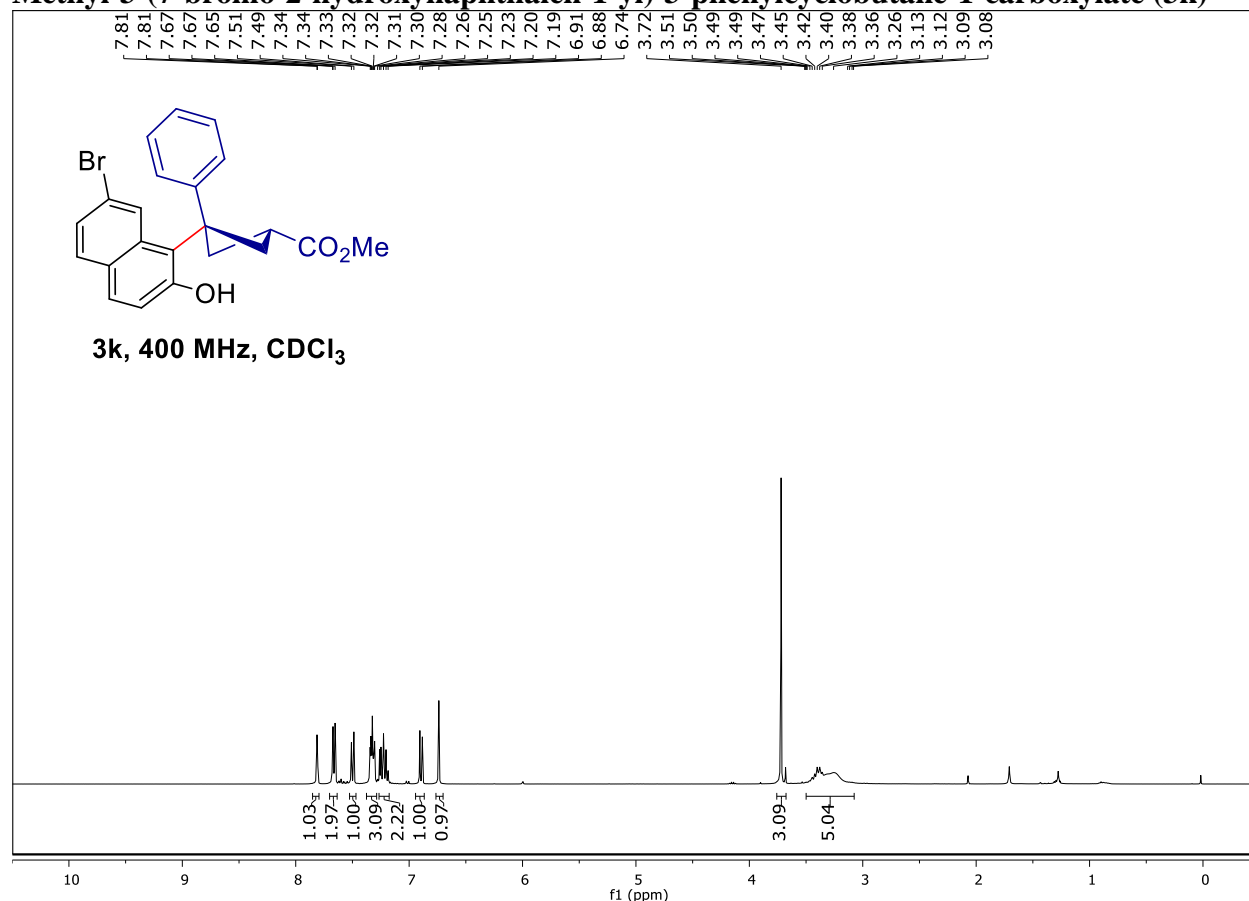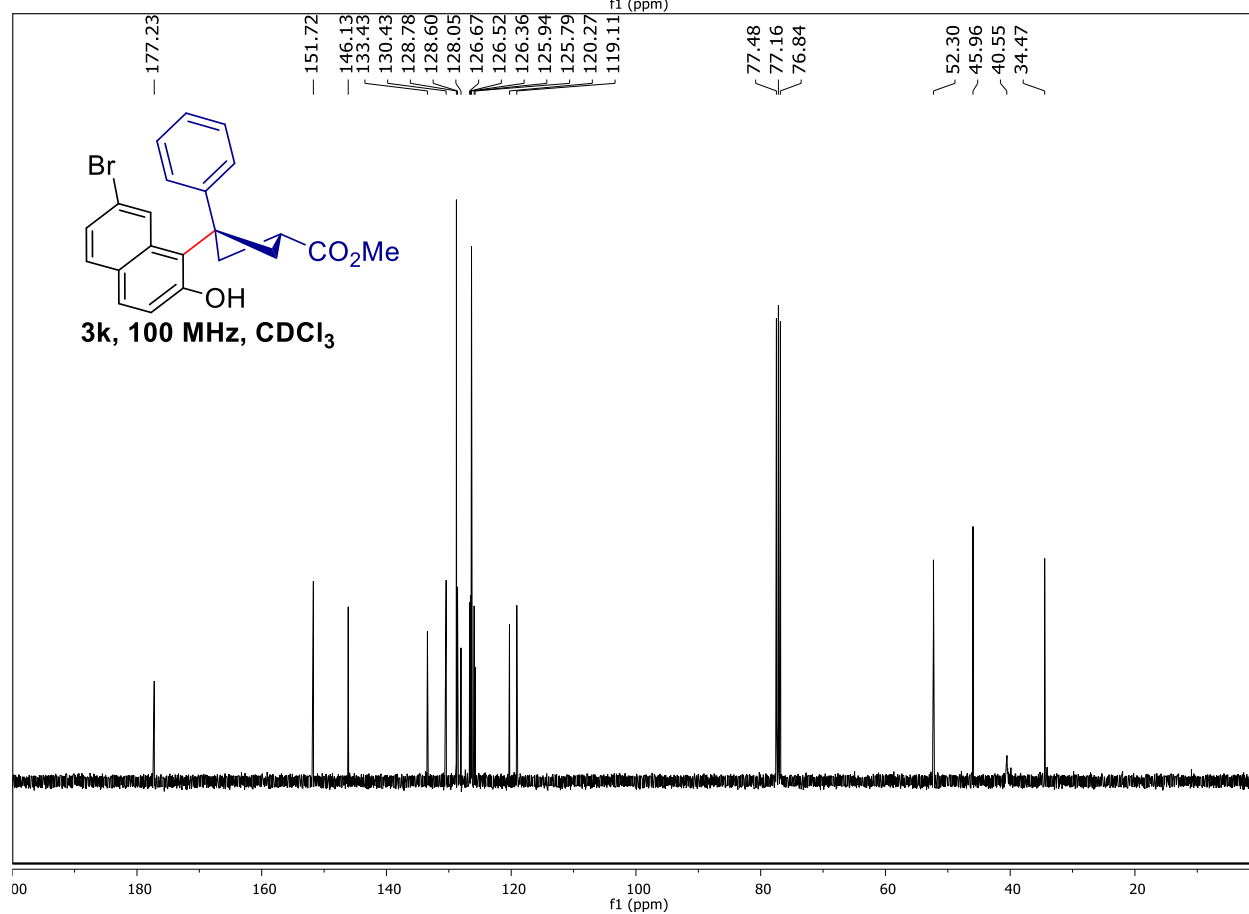

**Methyl-3-(2-hydroxy-7-phenylnaphthalen-1-yl)-3-phenylcyclobutane-1-carboxylate (3l)**

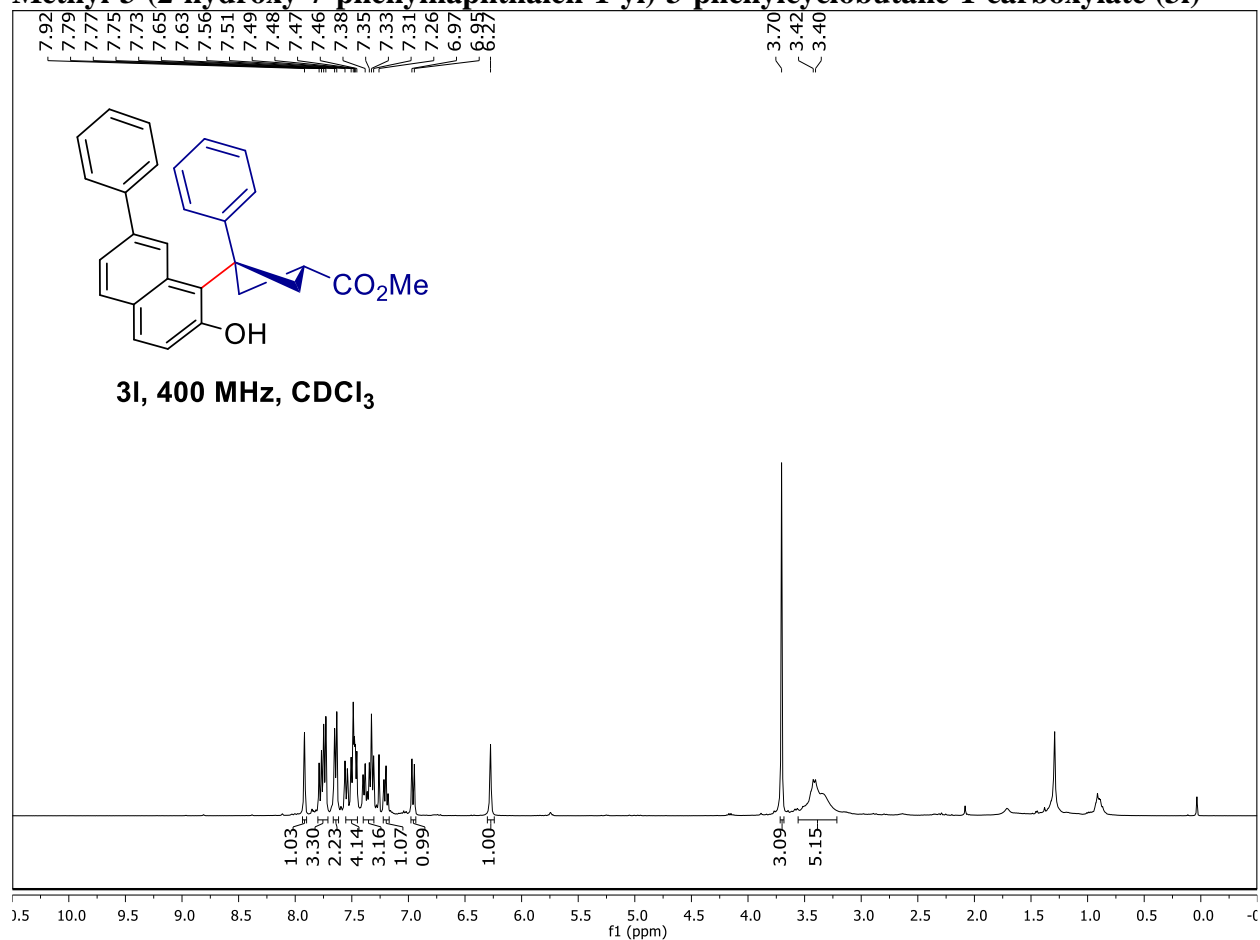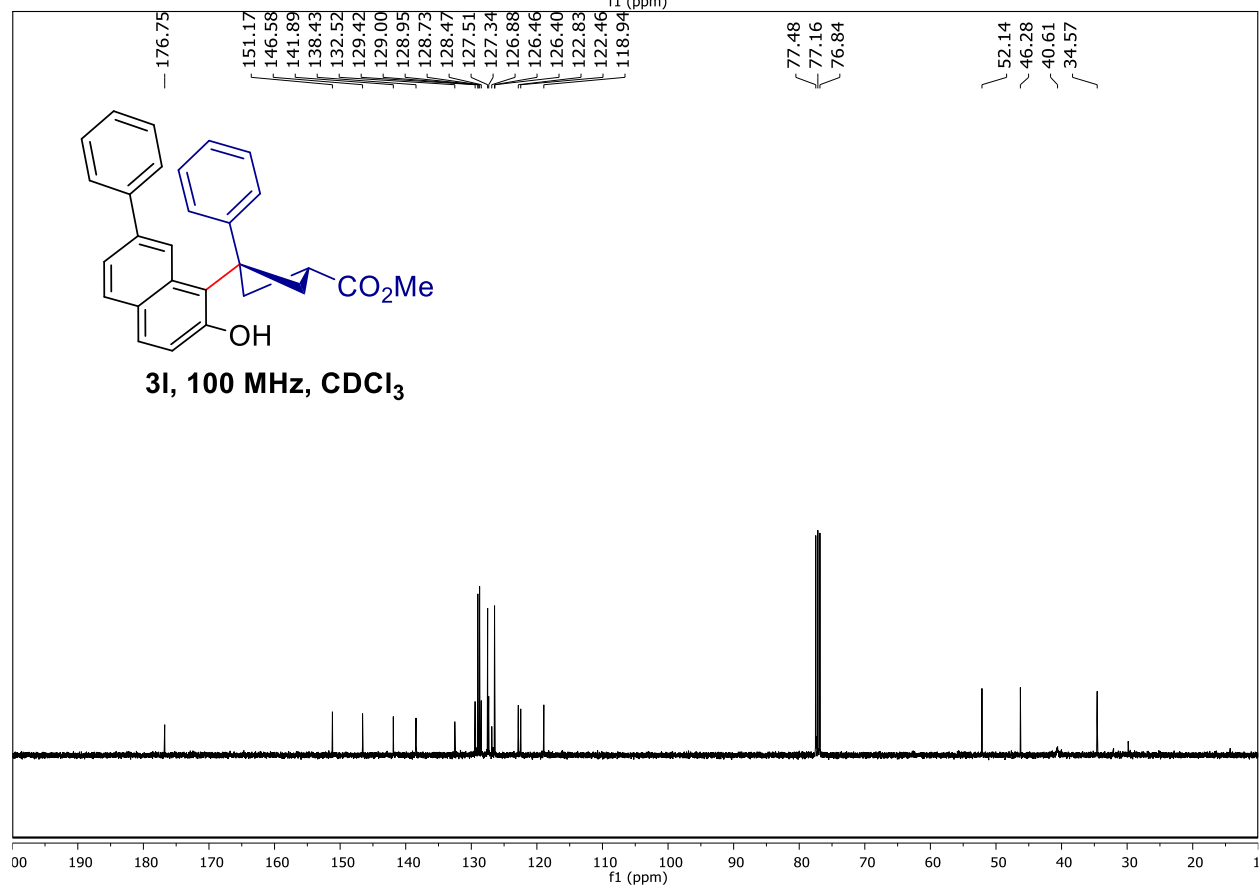

**Methyl-3-(7-(2-chlorophenyl)-2-hydroxynaphthalen-1-yl)-3-phenylcyclobutane-1-carboxylate (3m)**

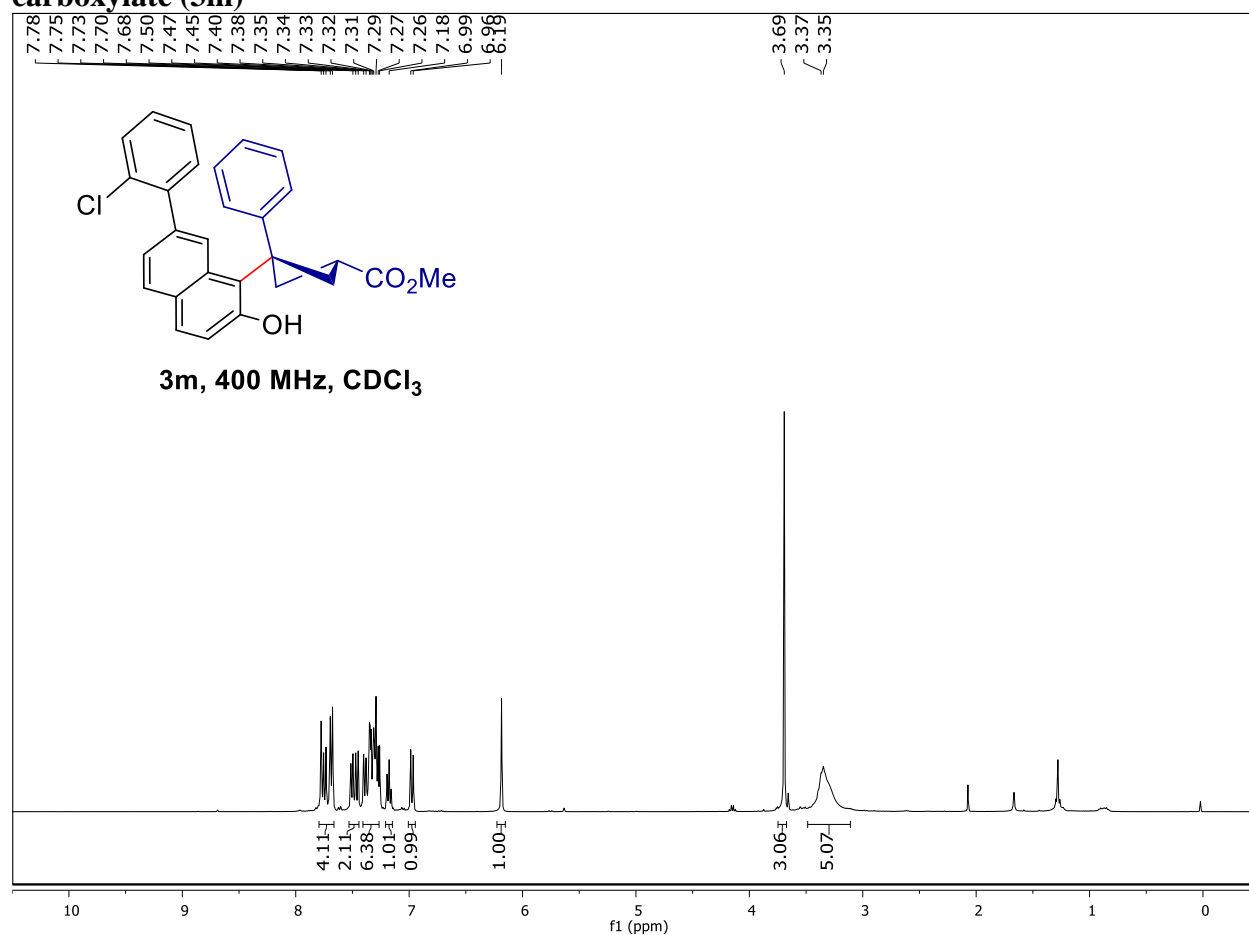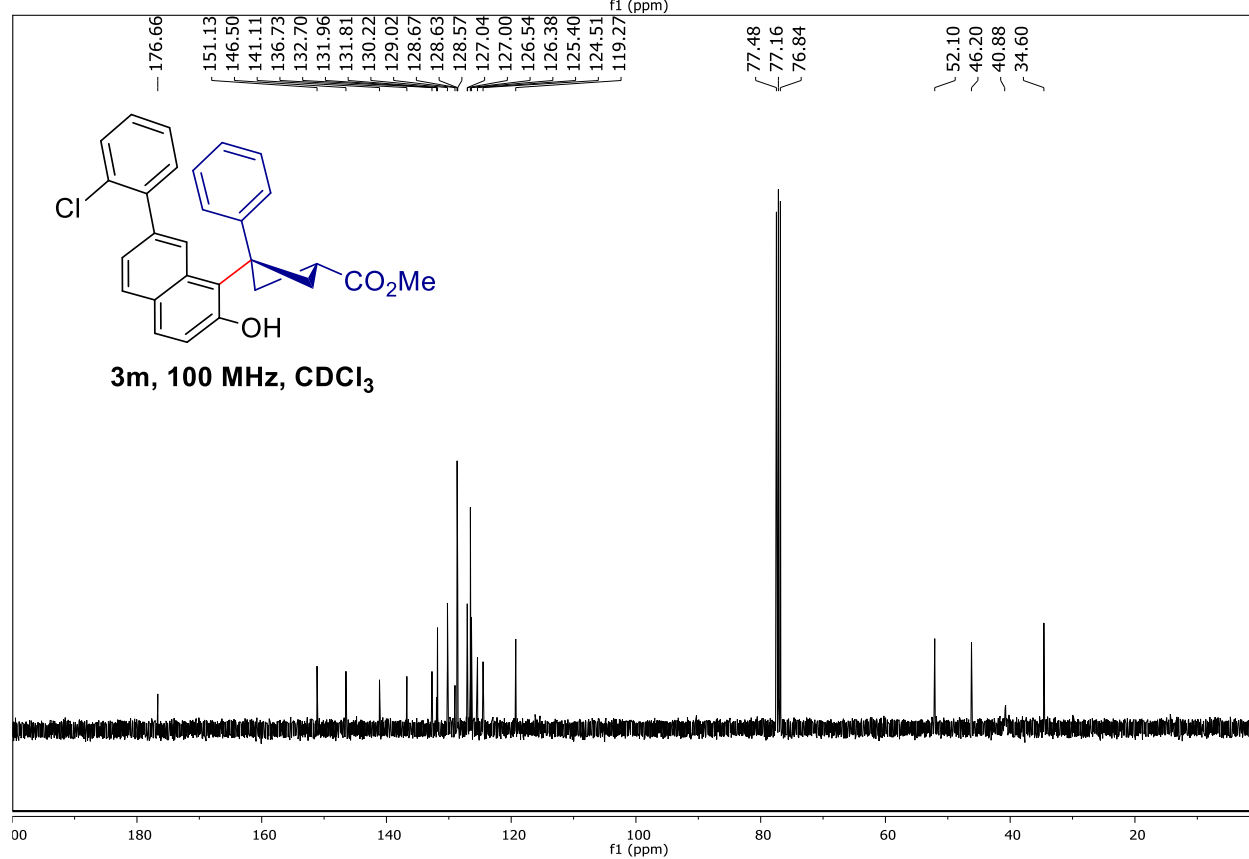

**Methyl-3-(2-hydroxy-7-(thiophen-3-yl)naphthalen-1-yl)-3-phenylcyclobutane-1-carboxylate (3n)**

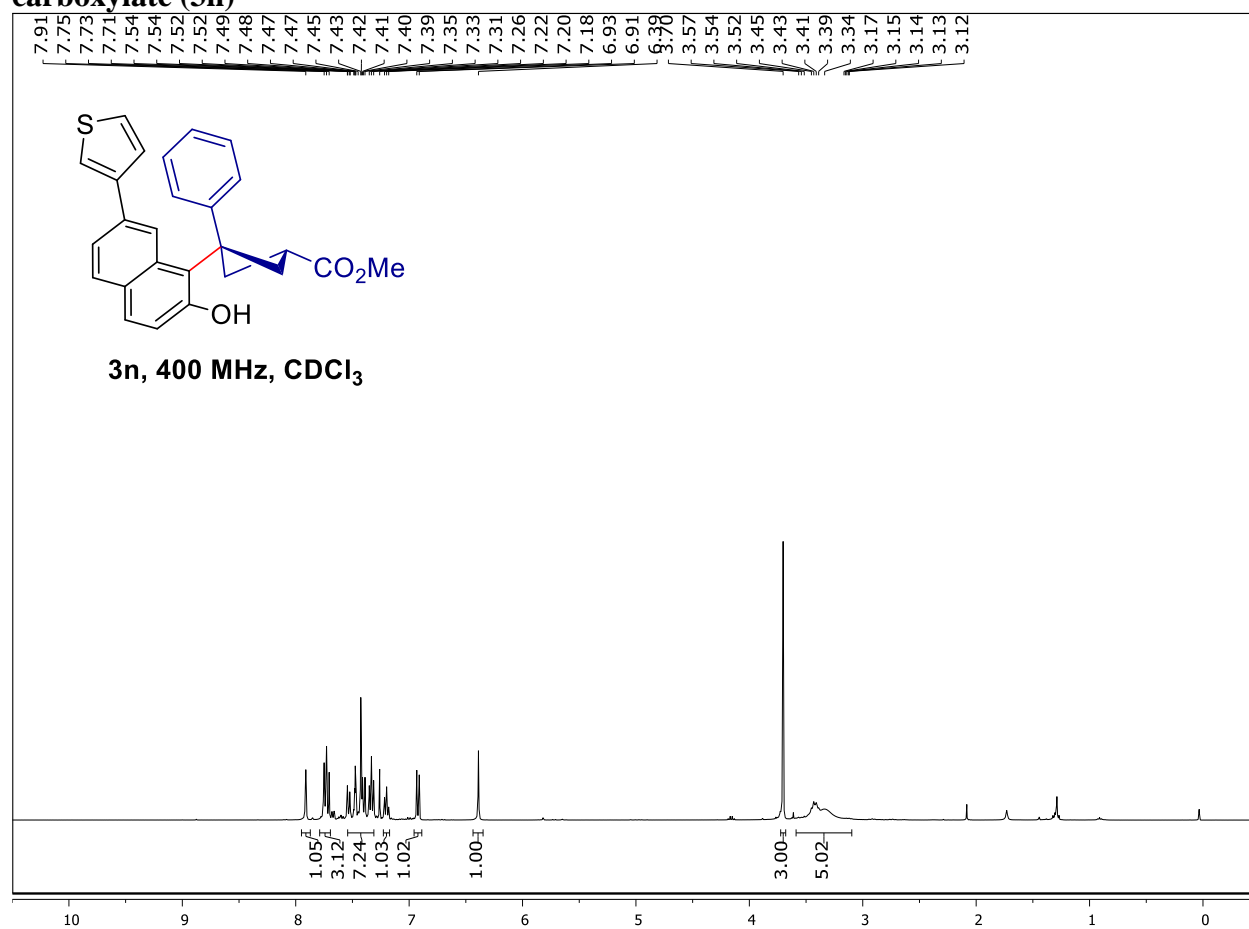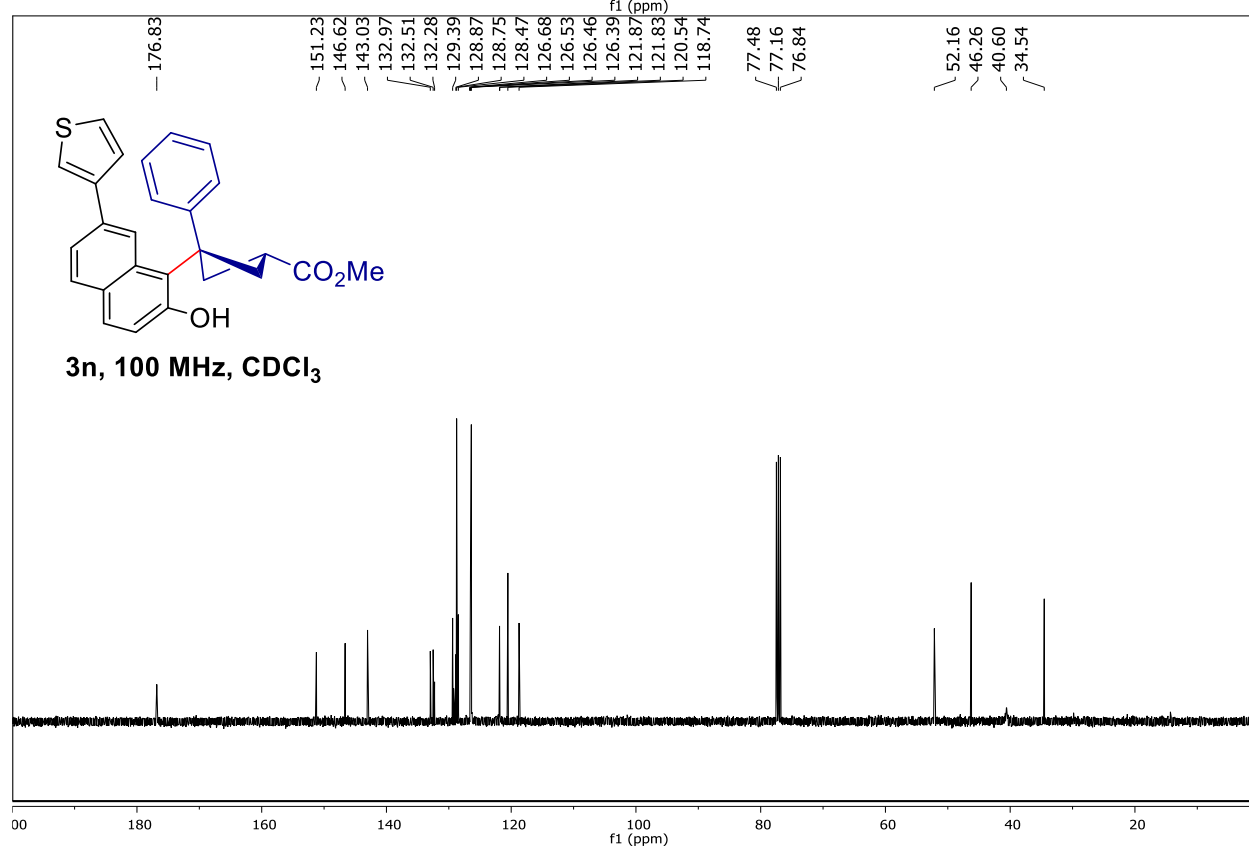

**Methyl-3-(6-(benzyloxy)-2-hydroxynaphthalen-1-yl)-3-phenylcyclobutane-1-carboxylate (3o)**

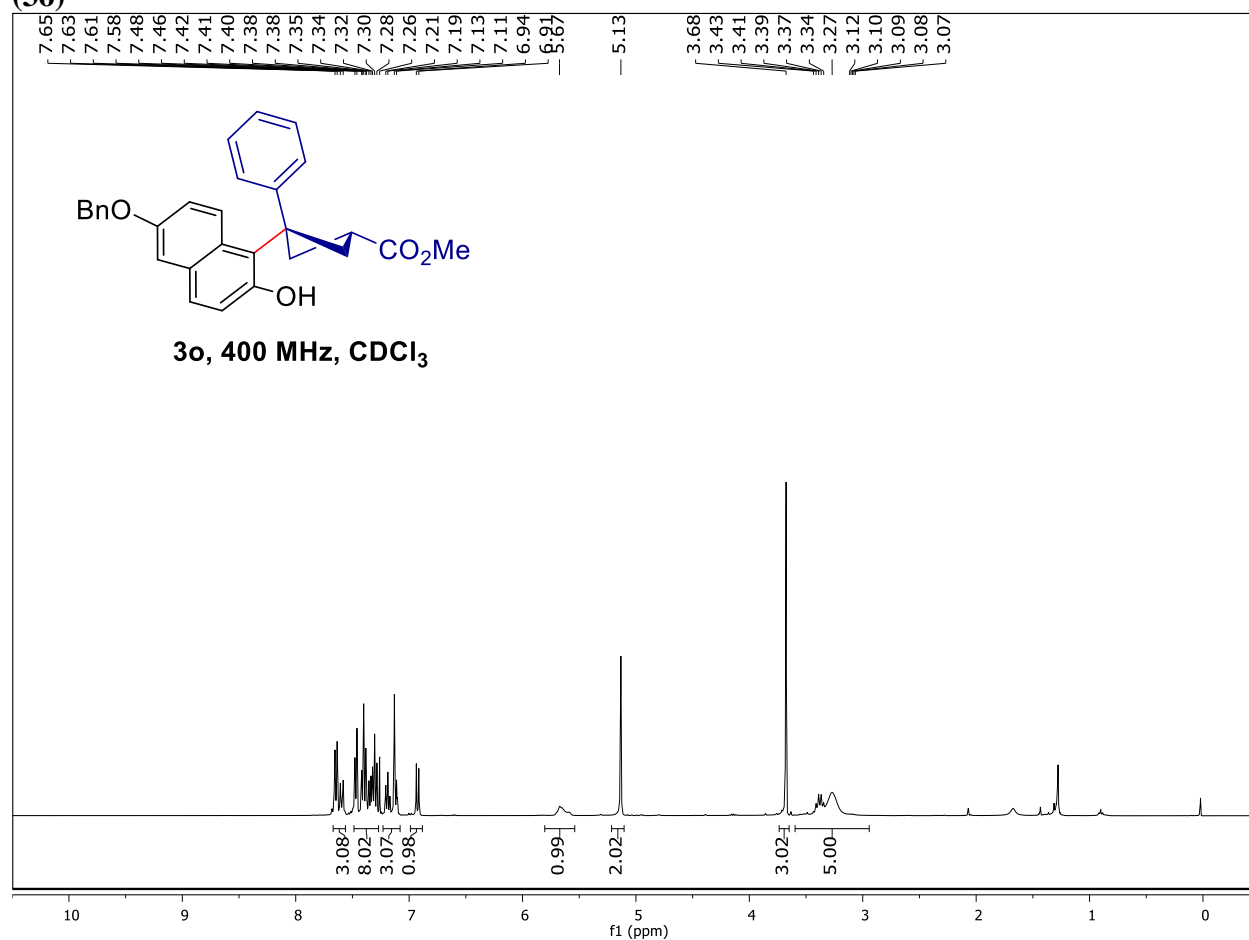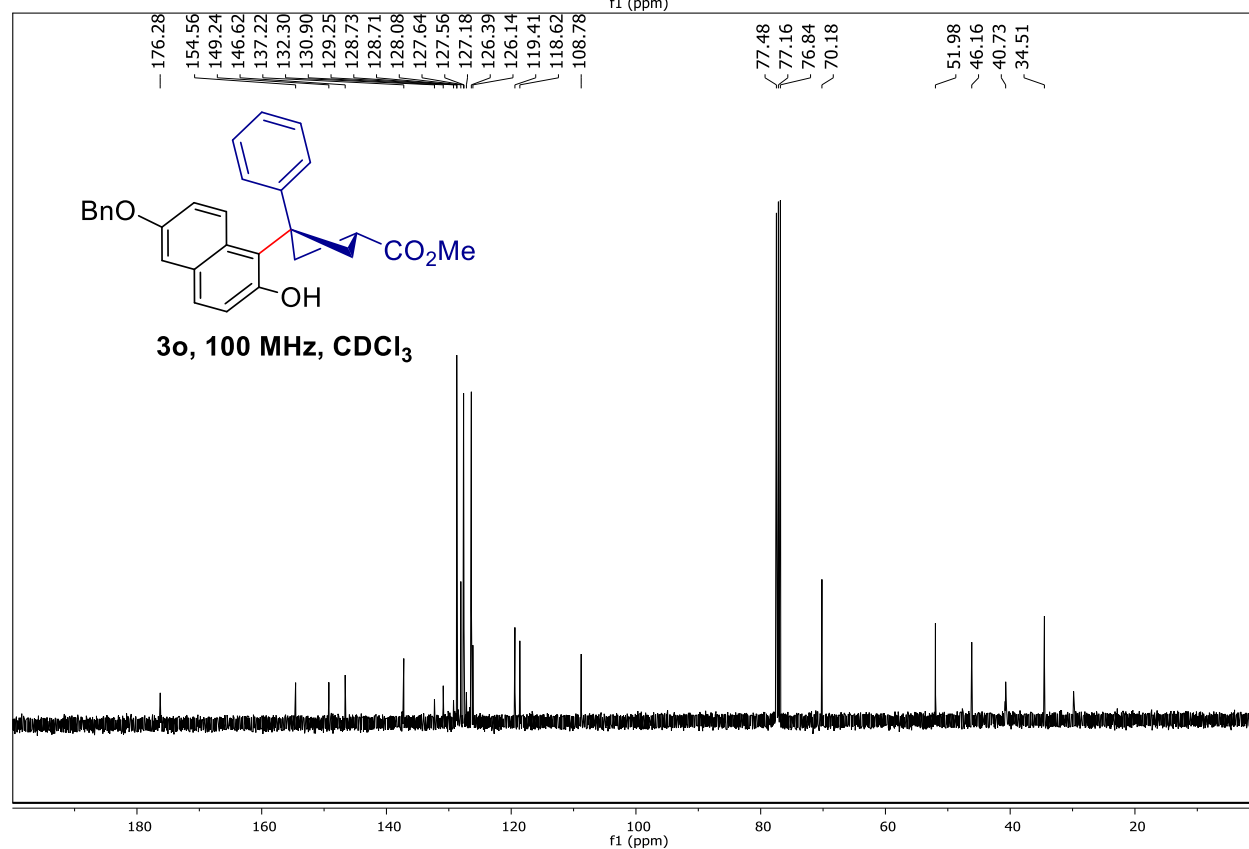

**Methyl 6-hydroxy-5-(3-(methoxycarbonyl)-1-phenylcyclobutyl)-2-naphthoate (3p)**

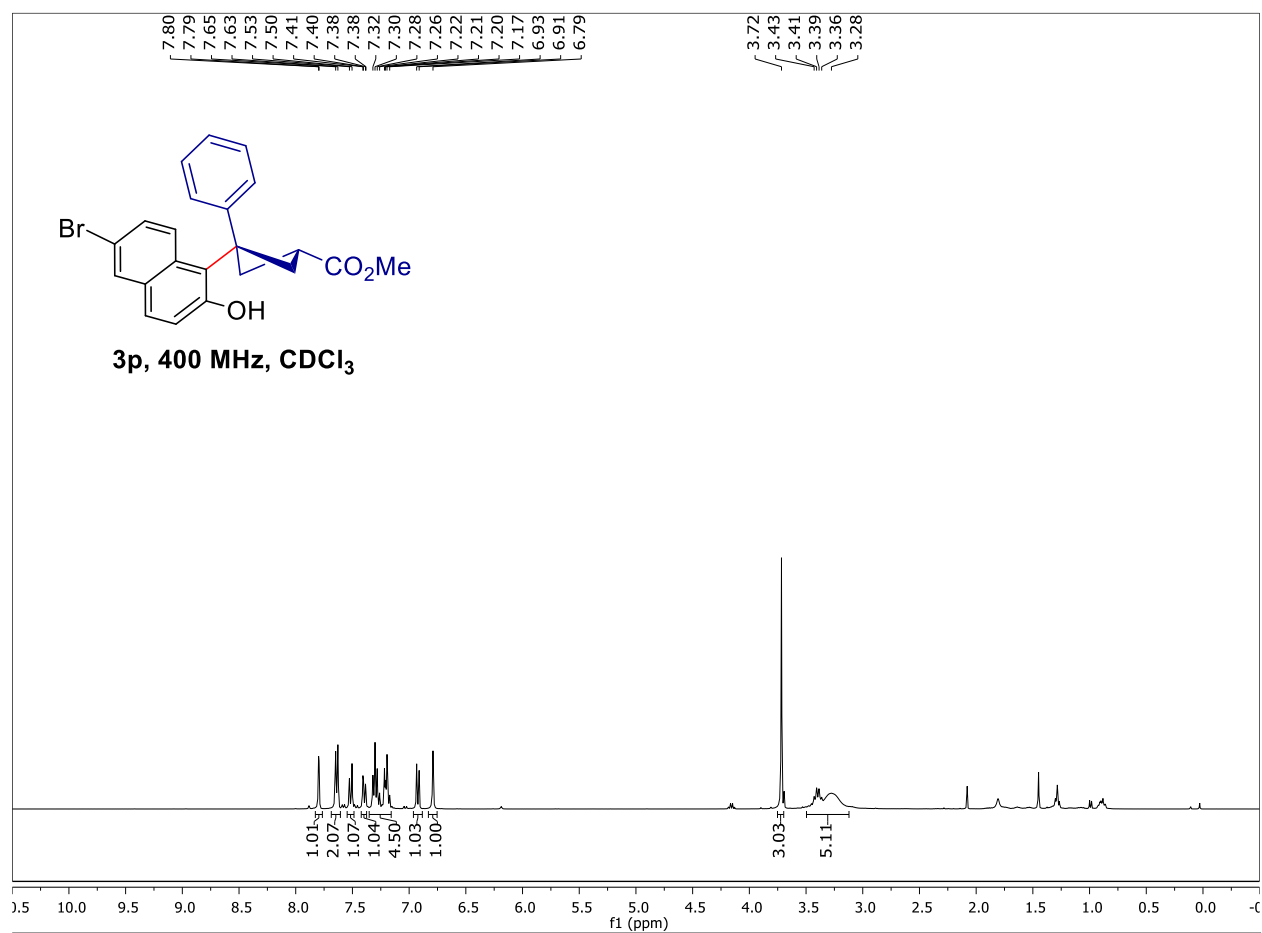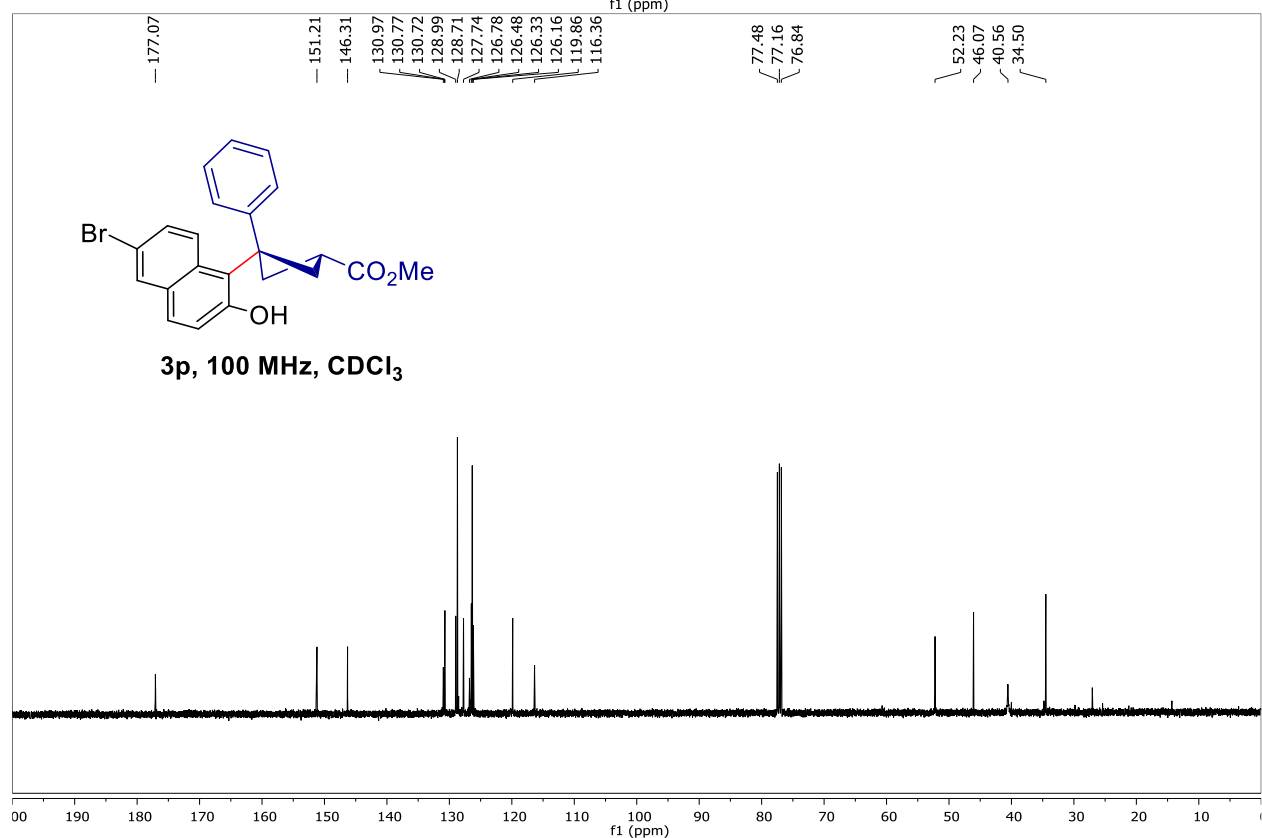

**Methyl-3-(6-(2,3-dimethylphenyl)-2-hydroxynaphthalen-1-yl)-3-phenylcyclobutane-1-carboxylate (3q)**

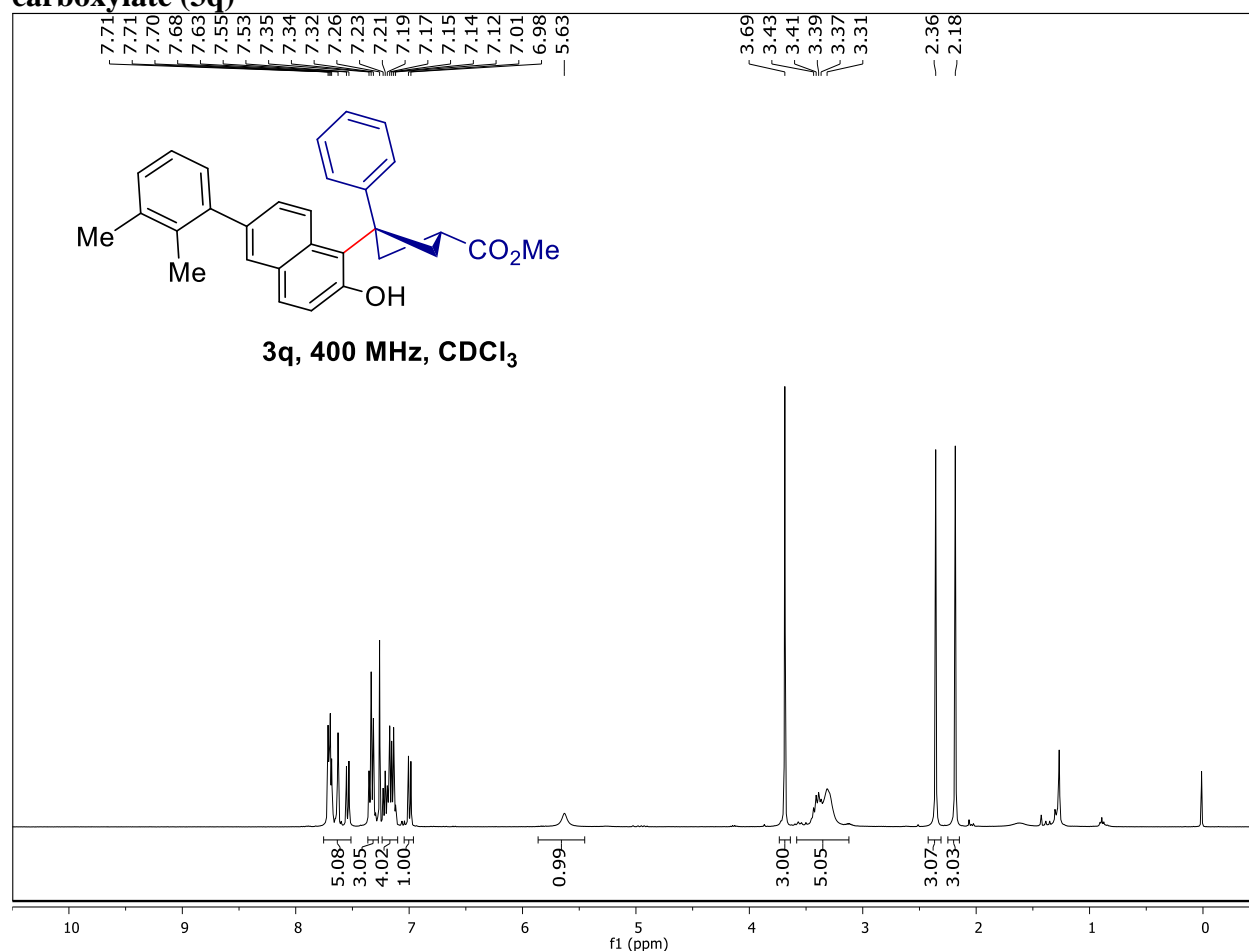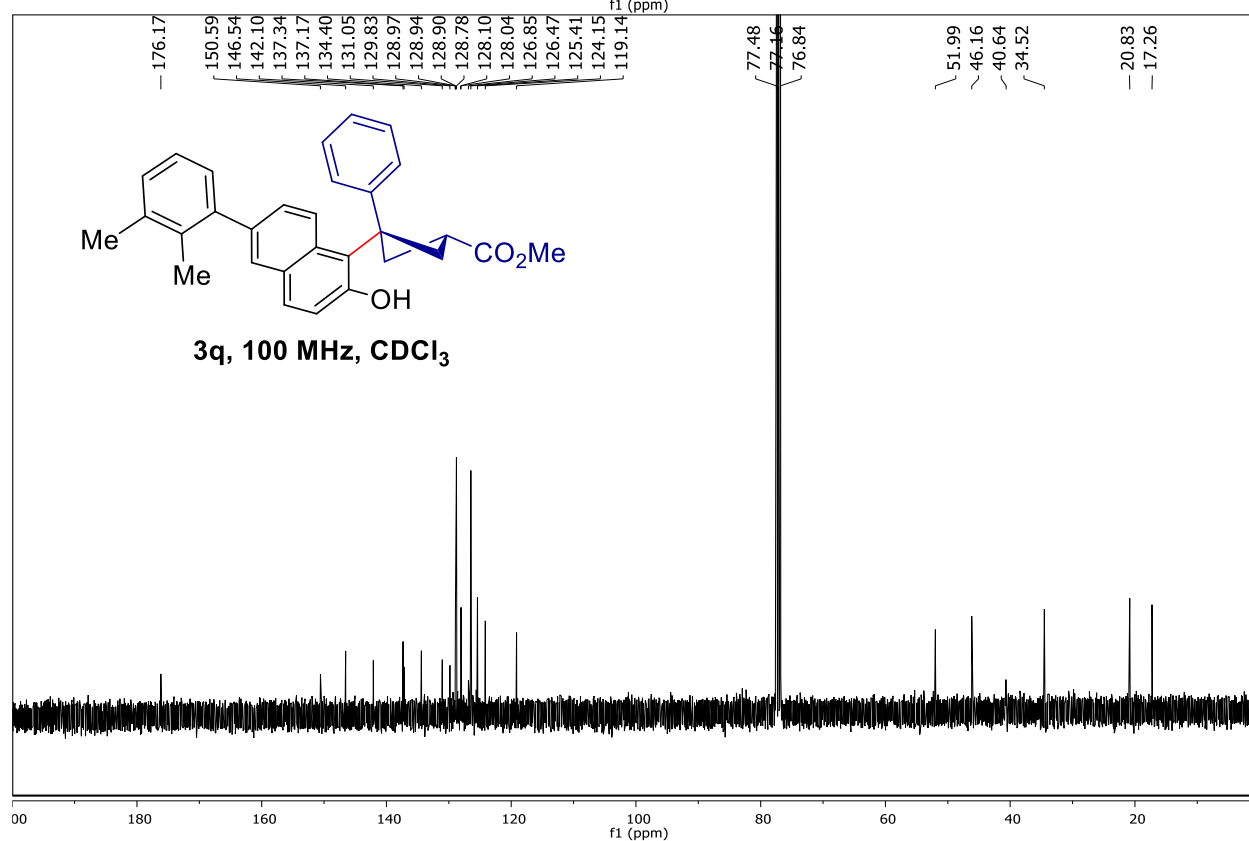

**Methyl-3-(6-hydroxy-[2,2'-binaphthalen]-5-yl)-3-phenylcyclobutane-1-carboxylate (3r)**

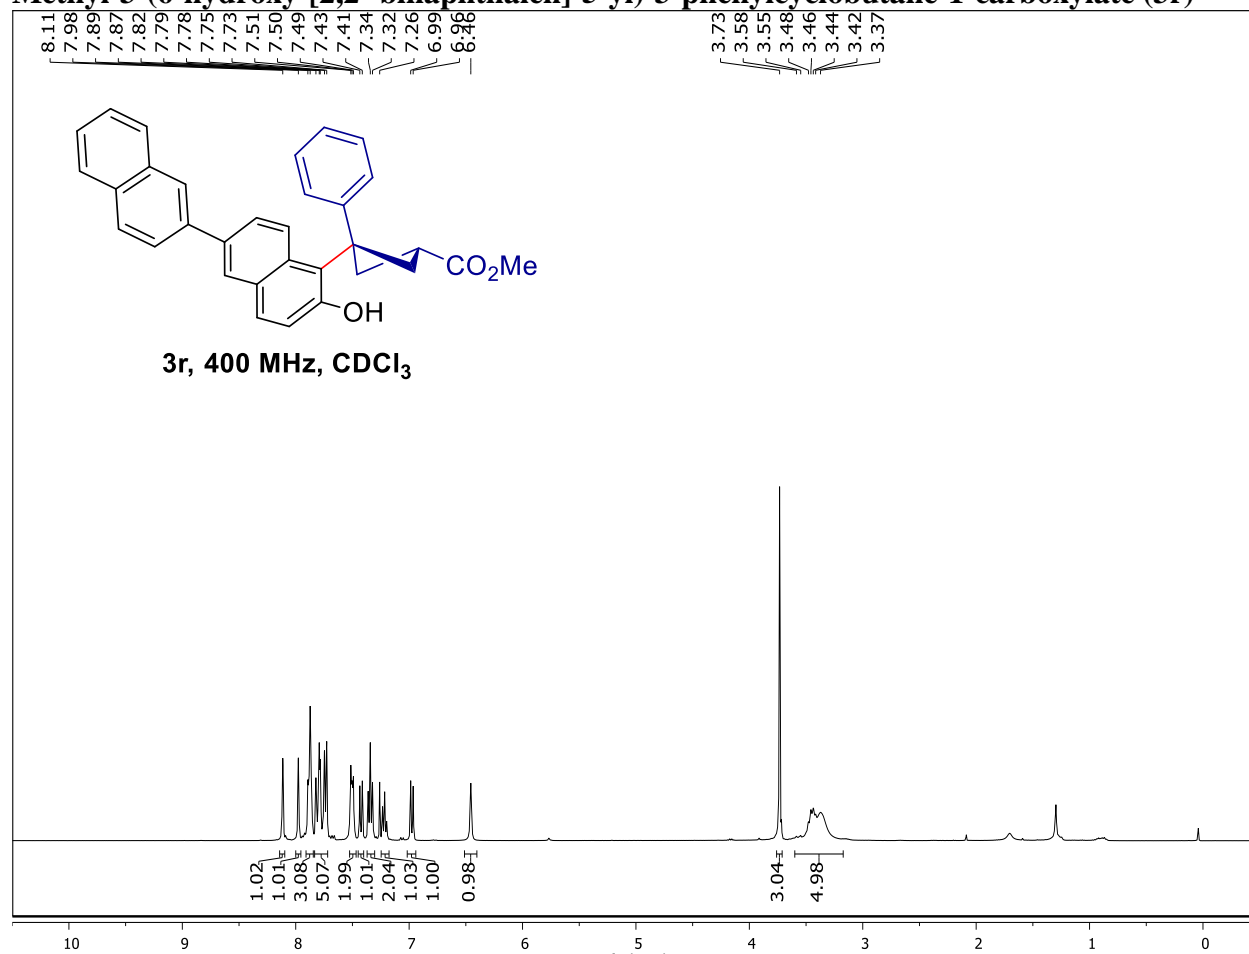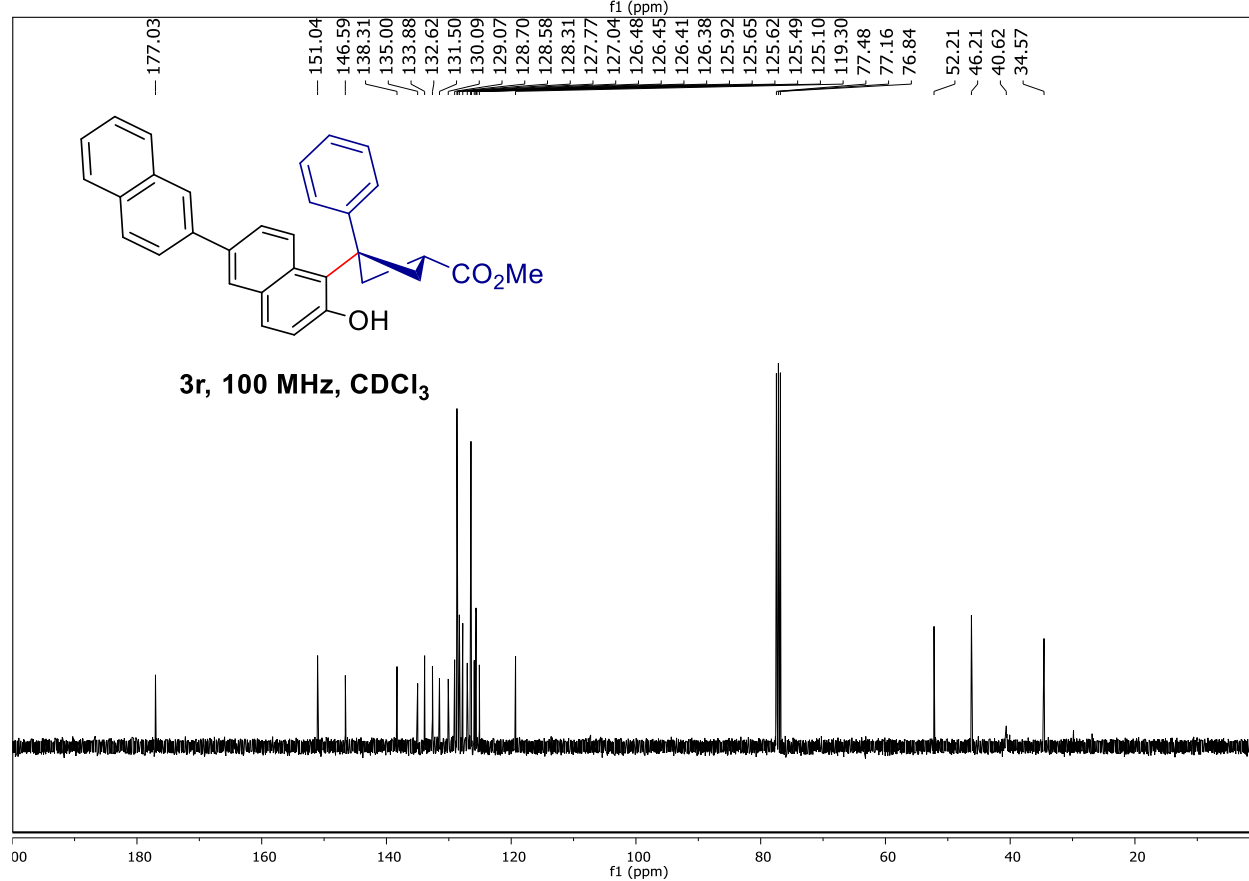

**Methyl 6-hydroxy-5-(3-(methoxycarbonyl)-1-phenylcyclobutyl)-2-naphthoate (3s)**

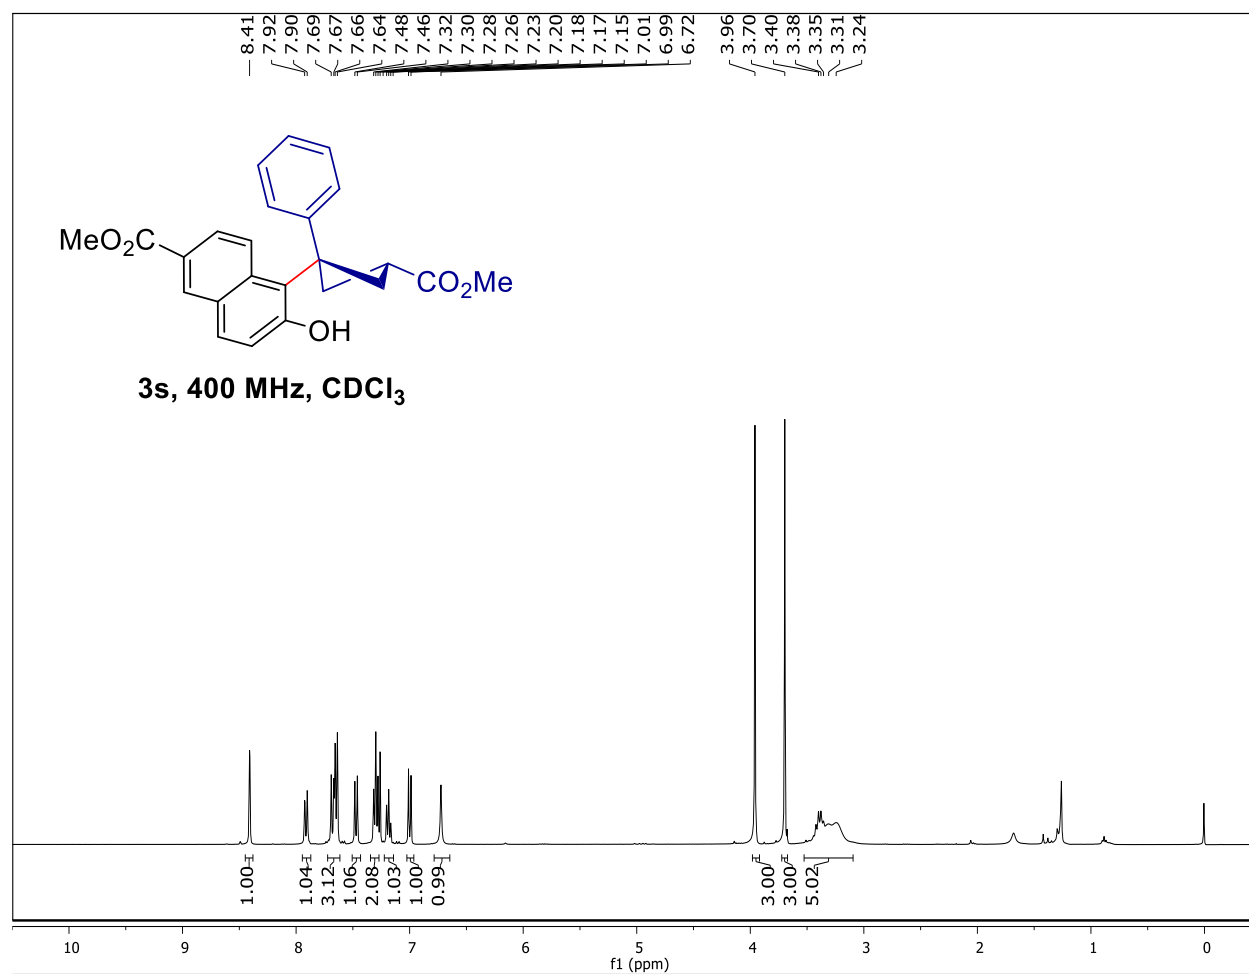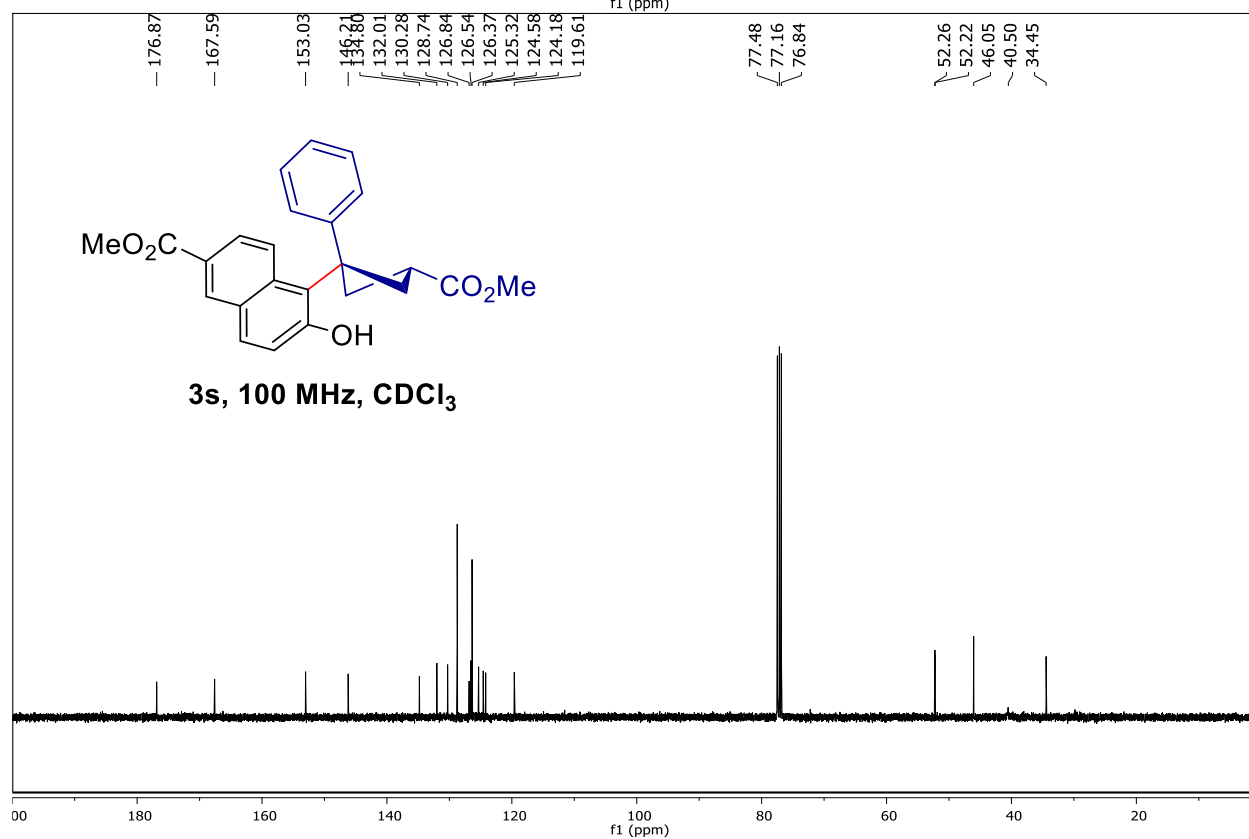

**Methyl-3-(4-bromo-2-hydroxynaphthalen-1-yl)-3-phenylcyclobutane-1-carboxylate (3t)**

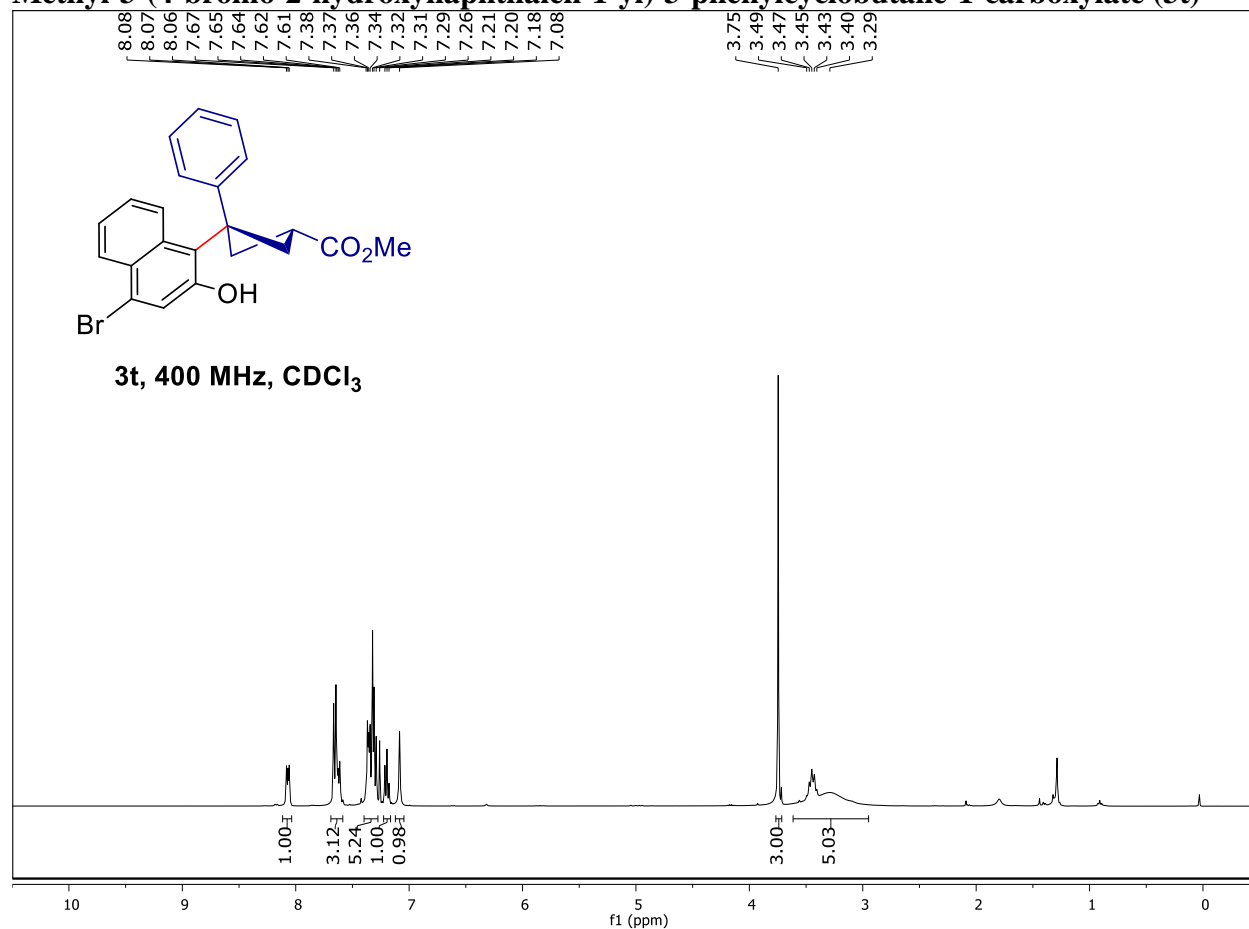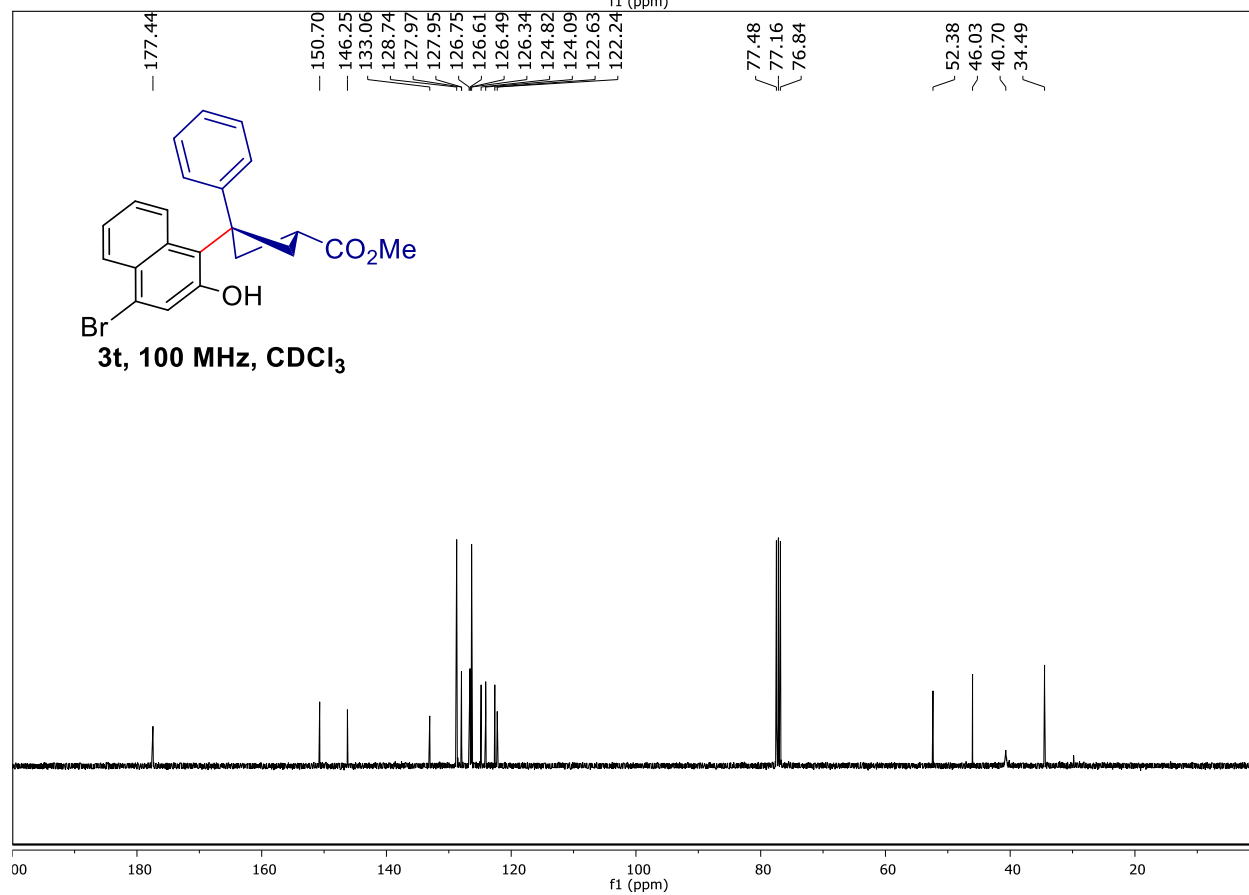

**Methyl-3-(2-hydroxy-4-phenylnaphthalen-1-yl)-3-phenylcyclobutane-1-carboxylate (3u)**

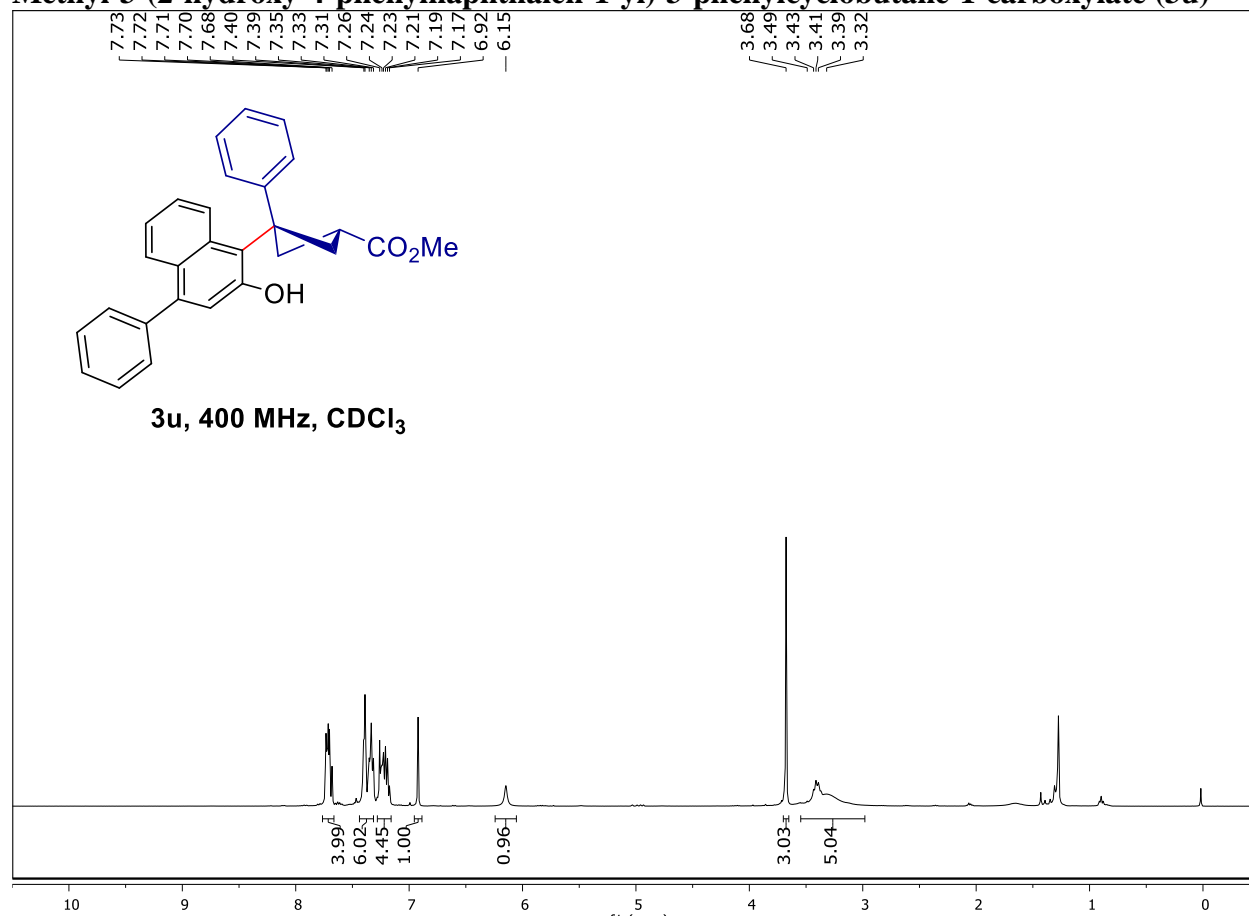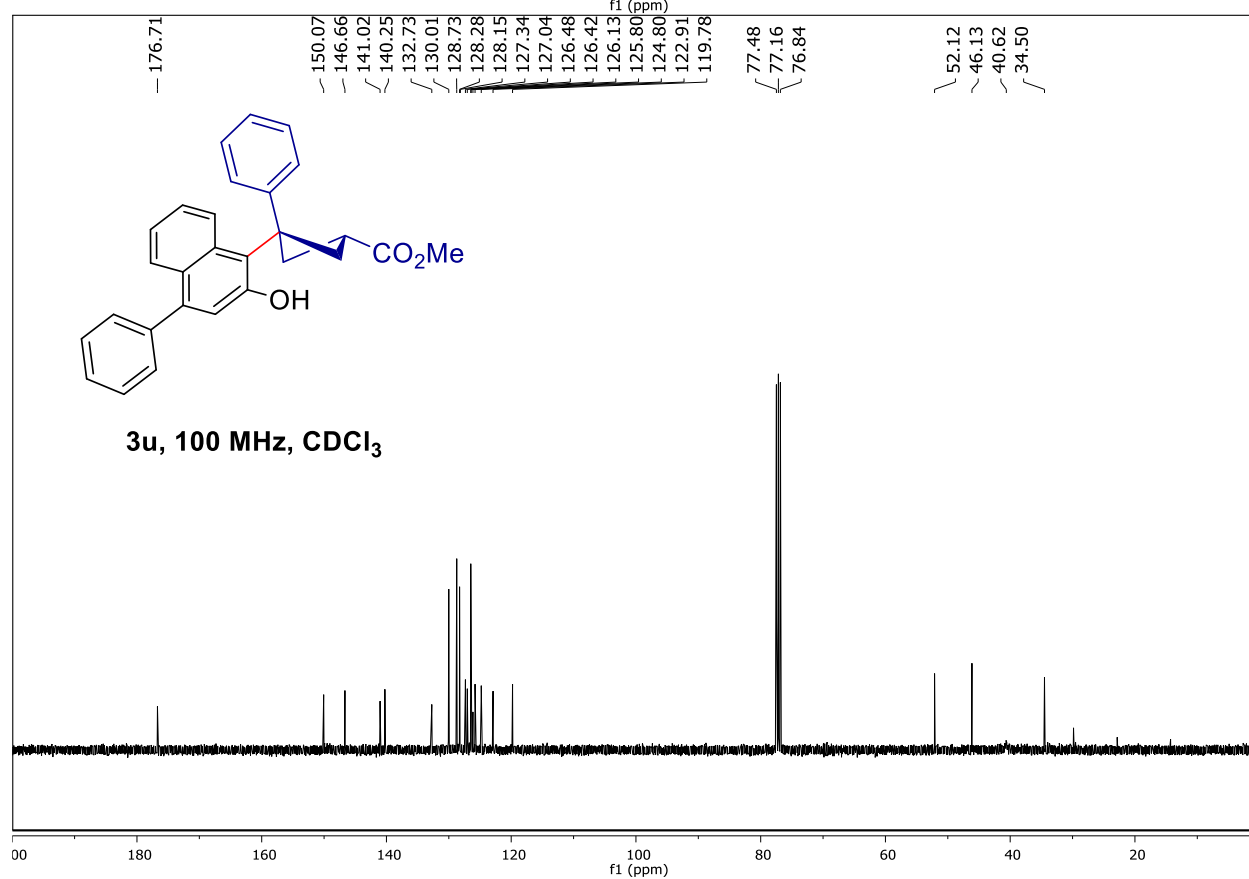

**Methyl-3-(4-(2-chlorophenyl)-2-hydroxynaphthalen-1-yl)-3-phenylcyclobutane-1-carboxylate (3v)**

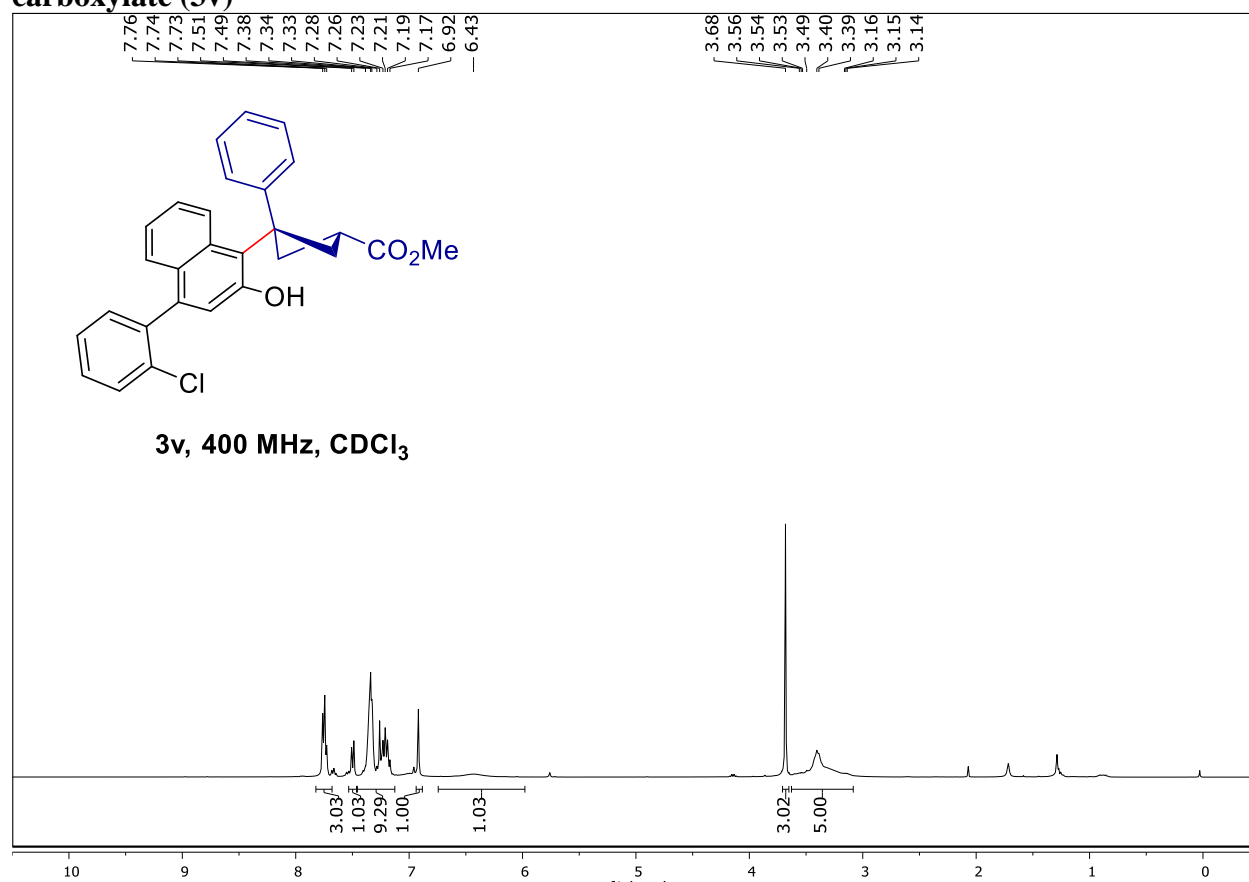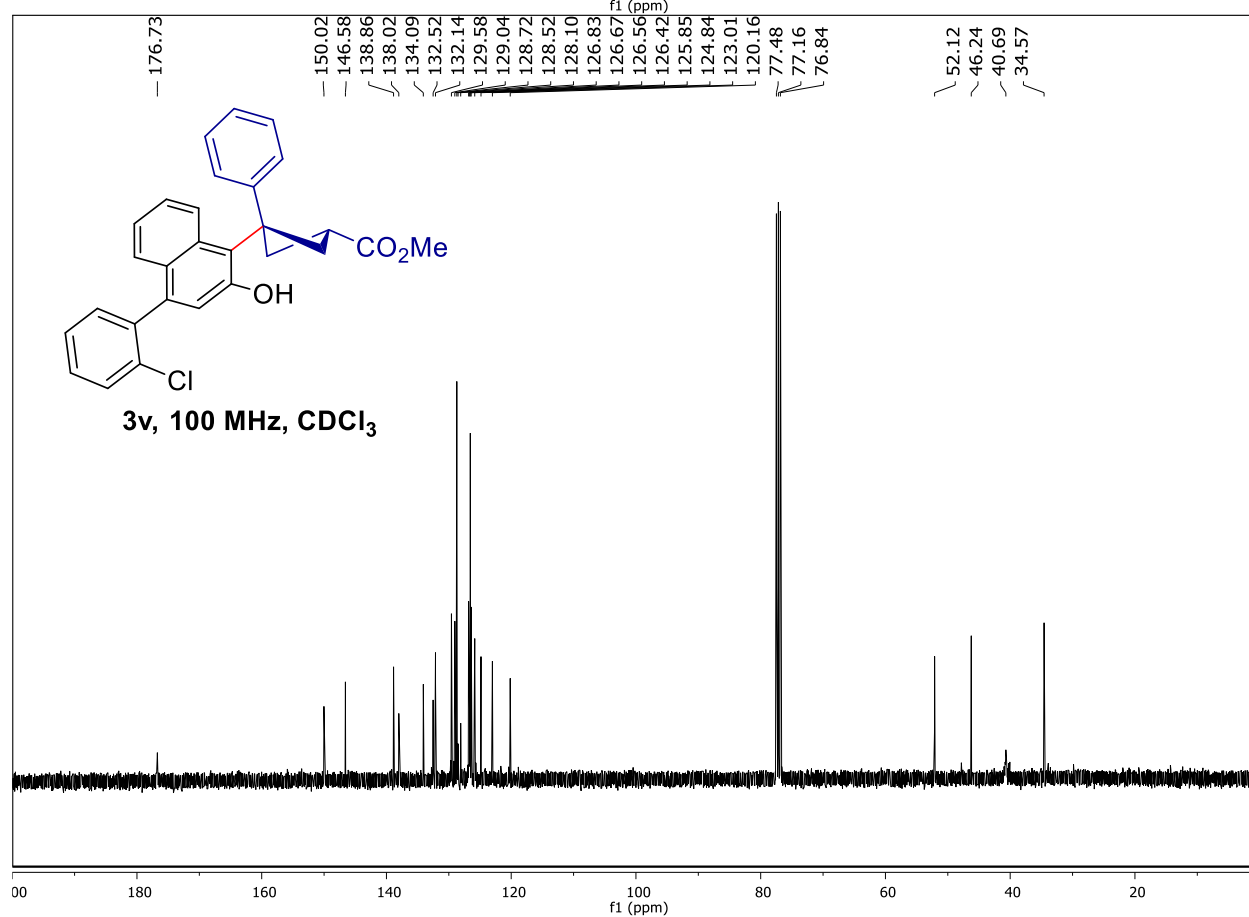

**Methyl-3-(2-hydroxy-3-methoxynaphthalen-1-yl)-3-phenylcyclobutane-1-carboxylate  
(3w)**

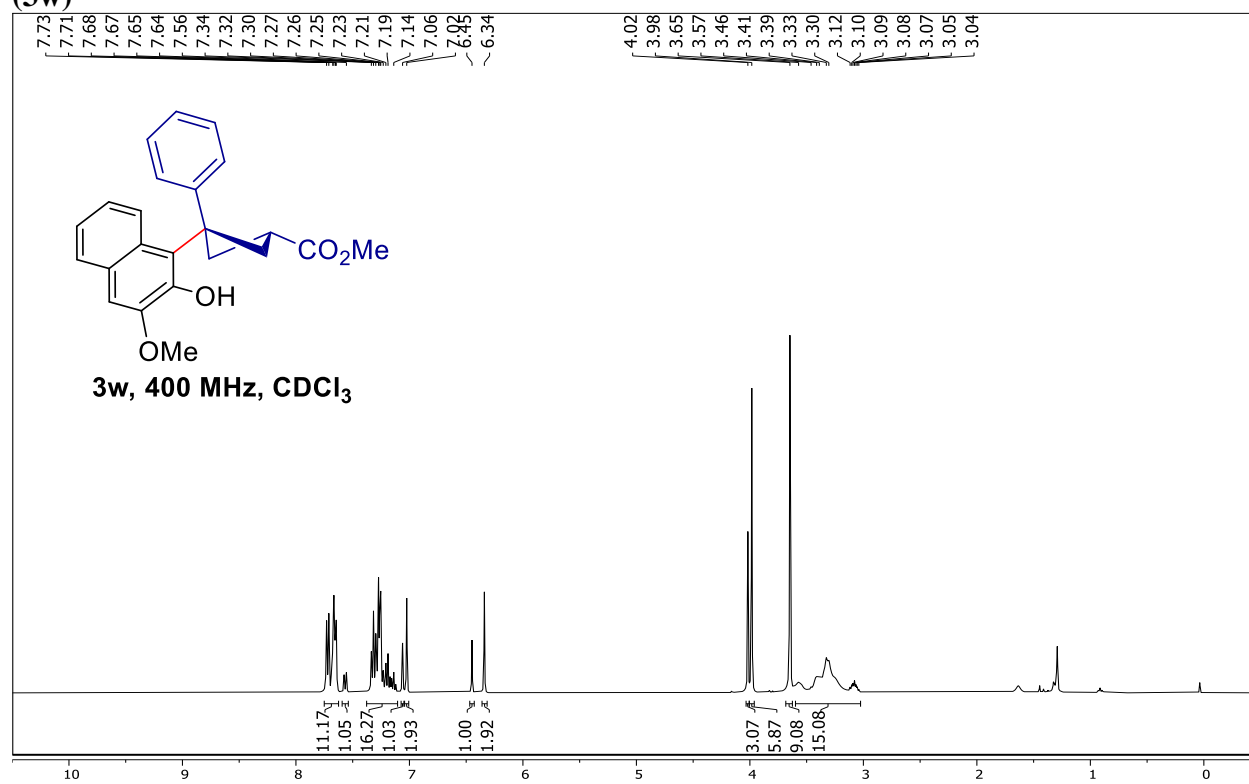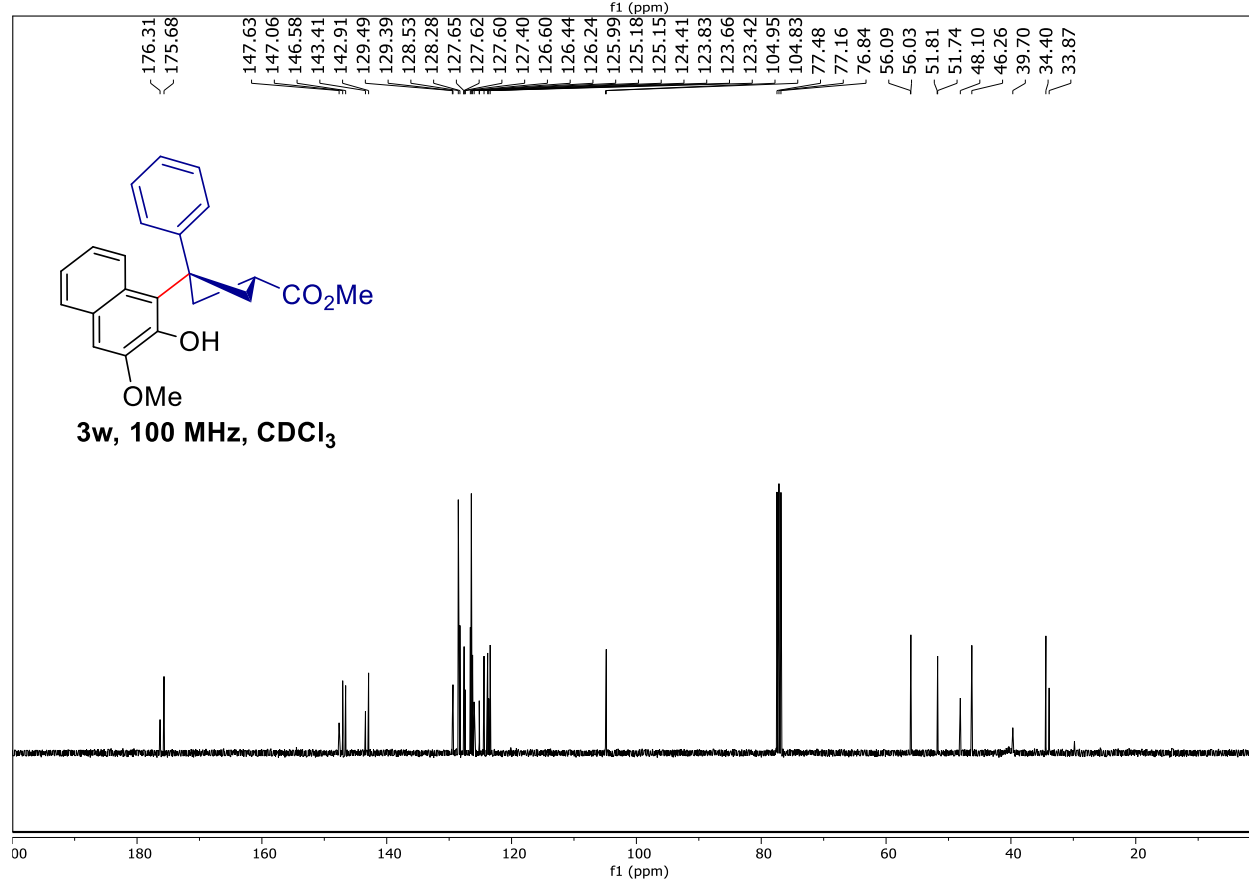

**Methyl-3-(1-hydroxynaphthalen-2-yl)-3-phenylcyclobutane-1-carboxylate (3x)**

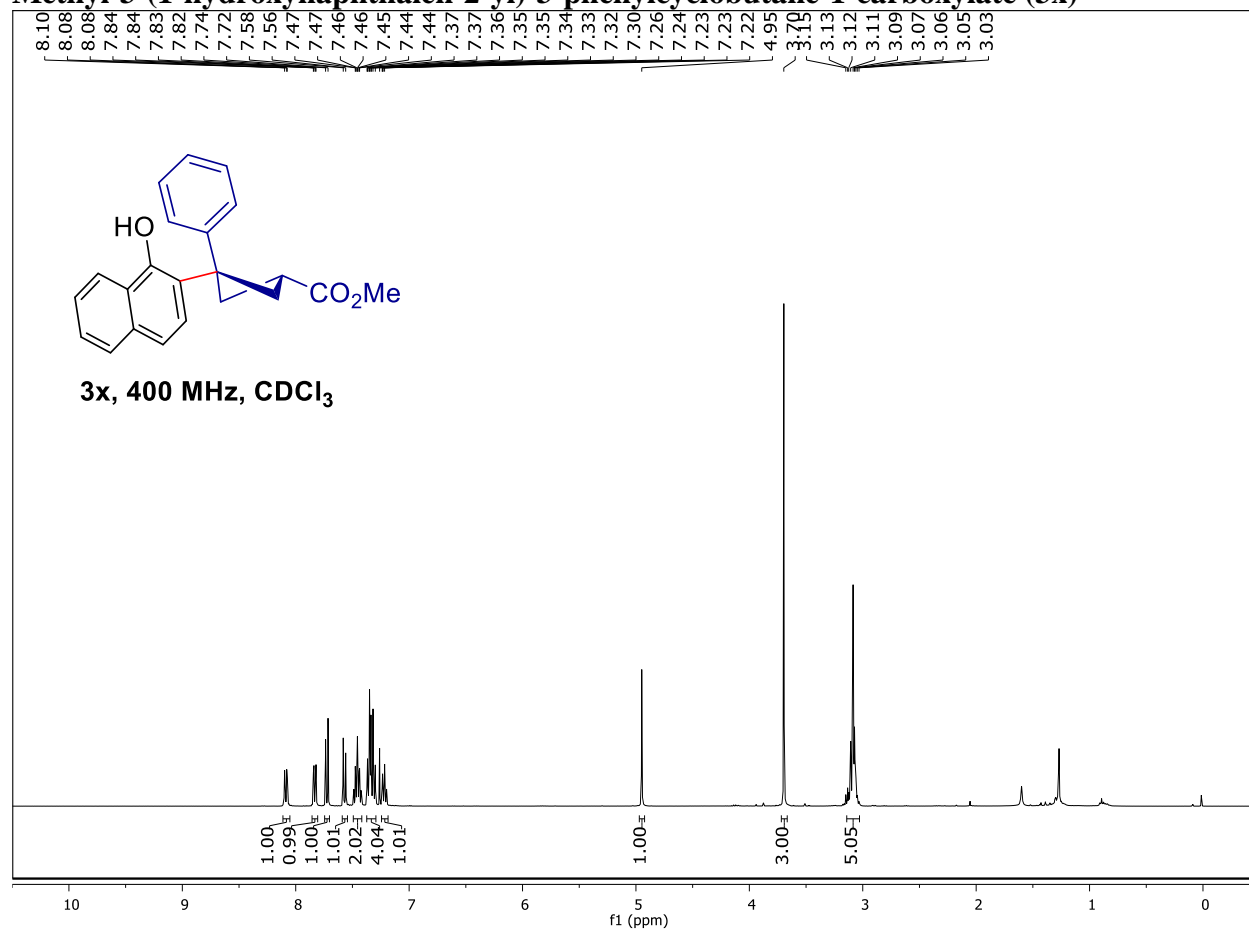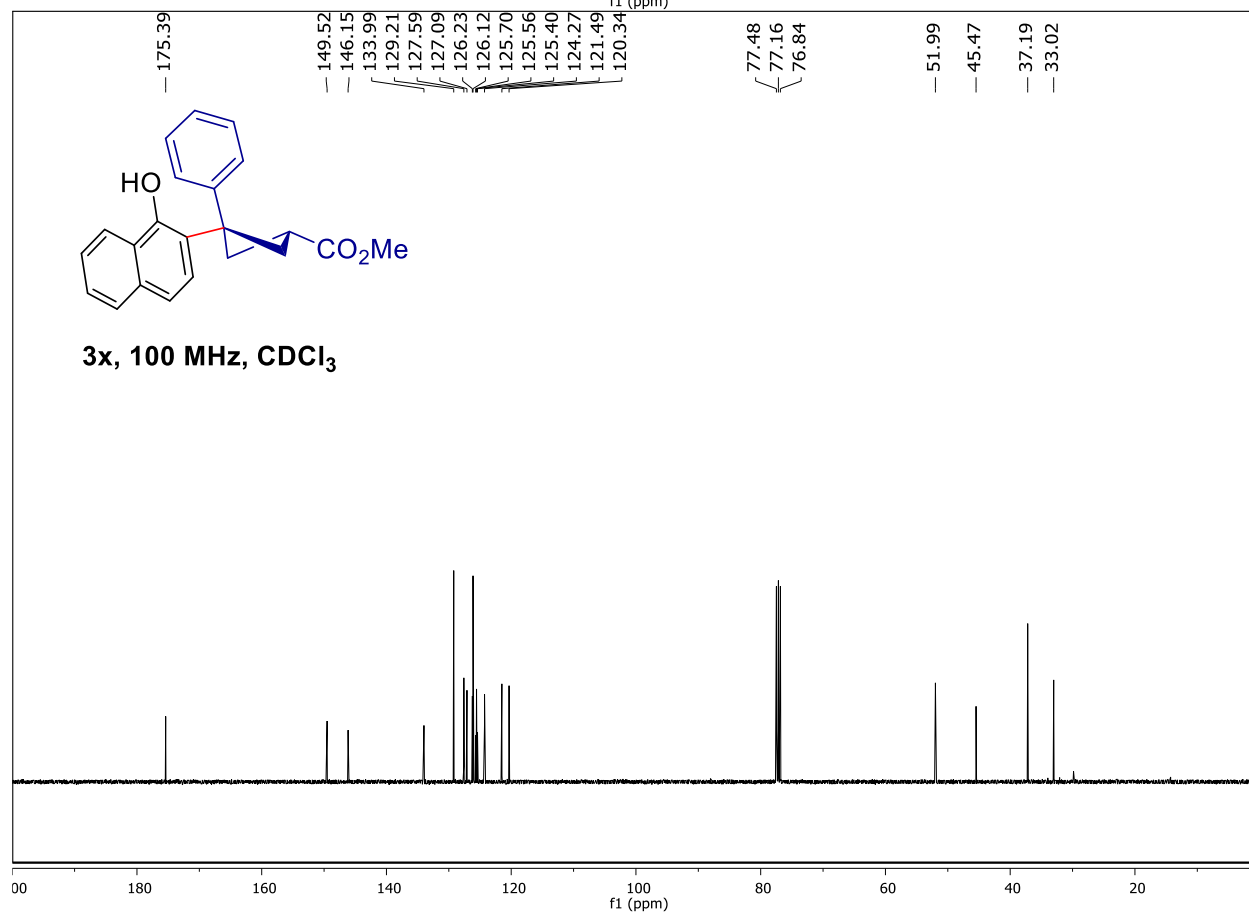

**Methyl-3-(2-hydroxy-4,5-dimethoxyphenyl)-3-phenylcyclobutane-1-carboxylate (3y)**

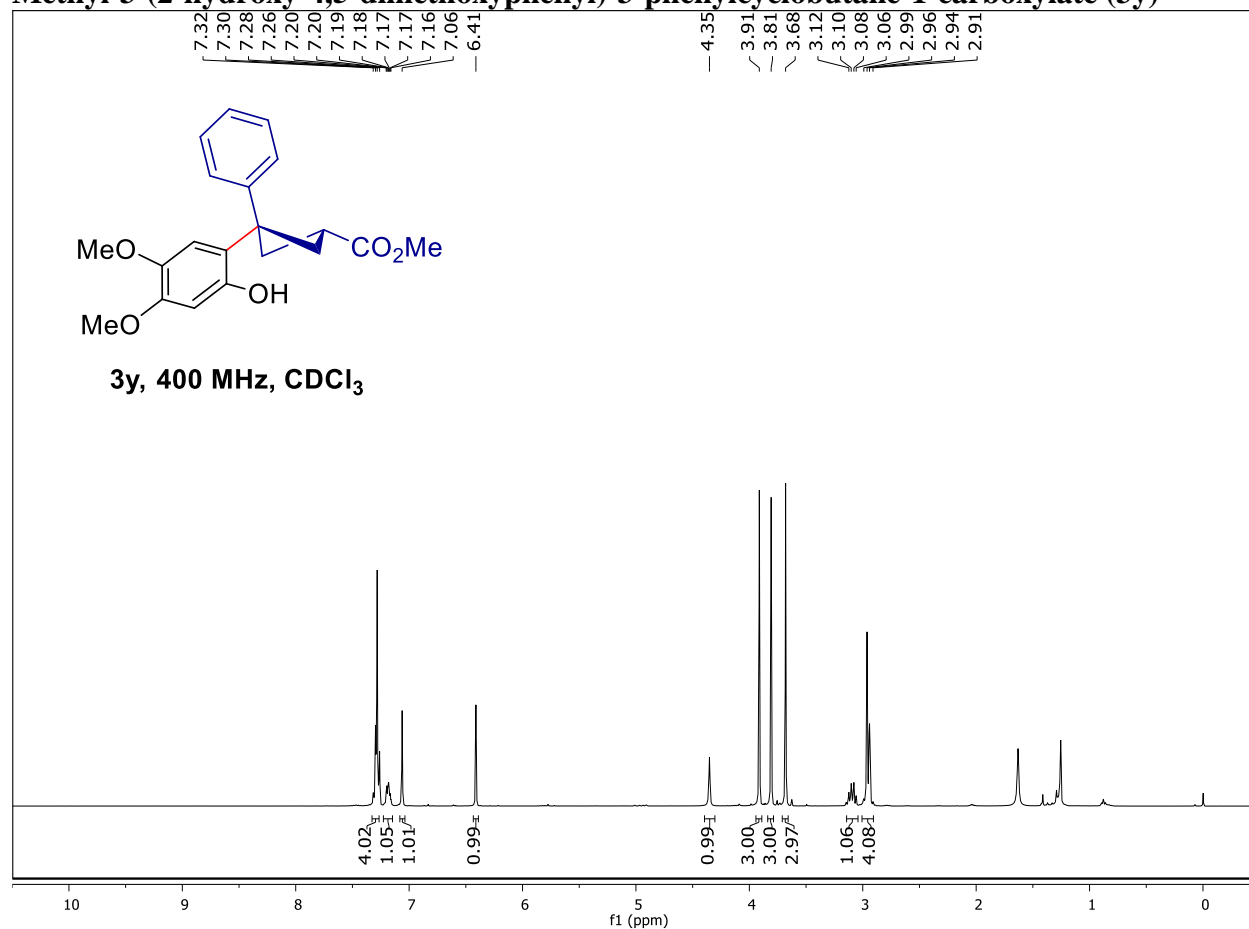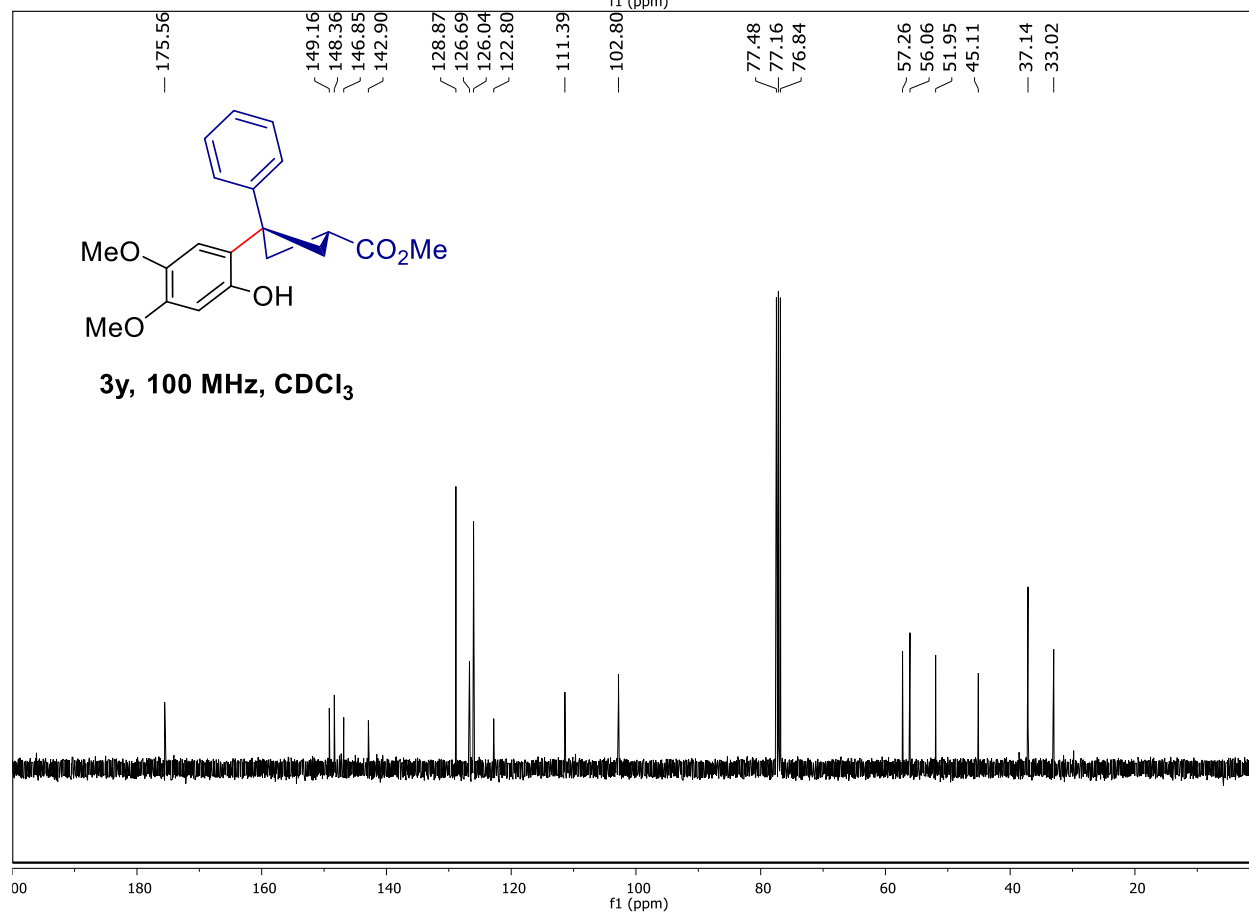

**Methyl-3-(6-hydroxybenzo[d][1,3]dioxol-5-yl)-3-phenylcyclobutane-1-carboxylate (3z)**

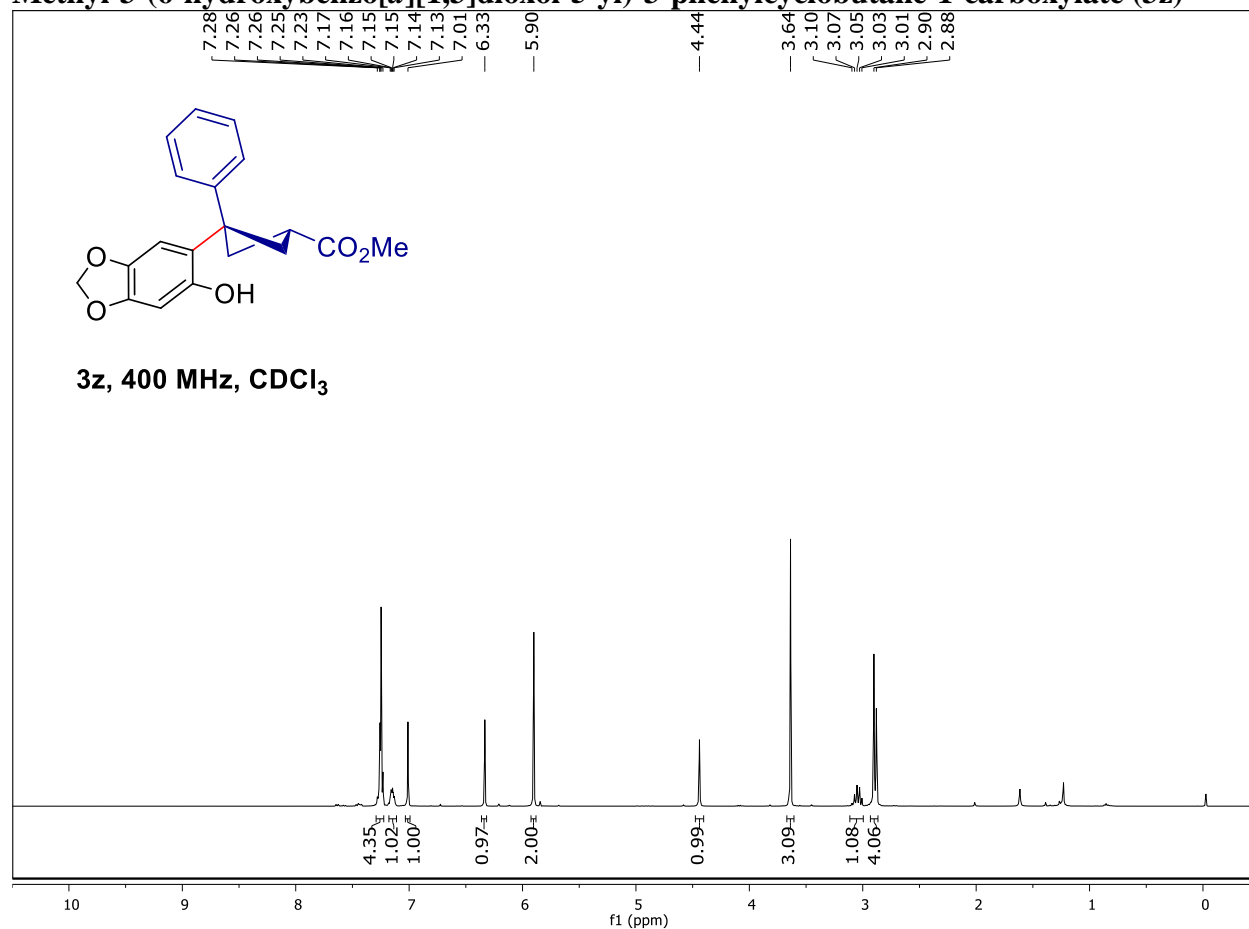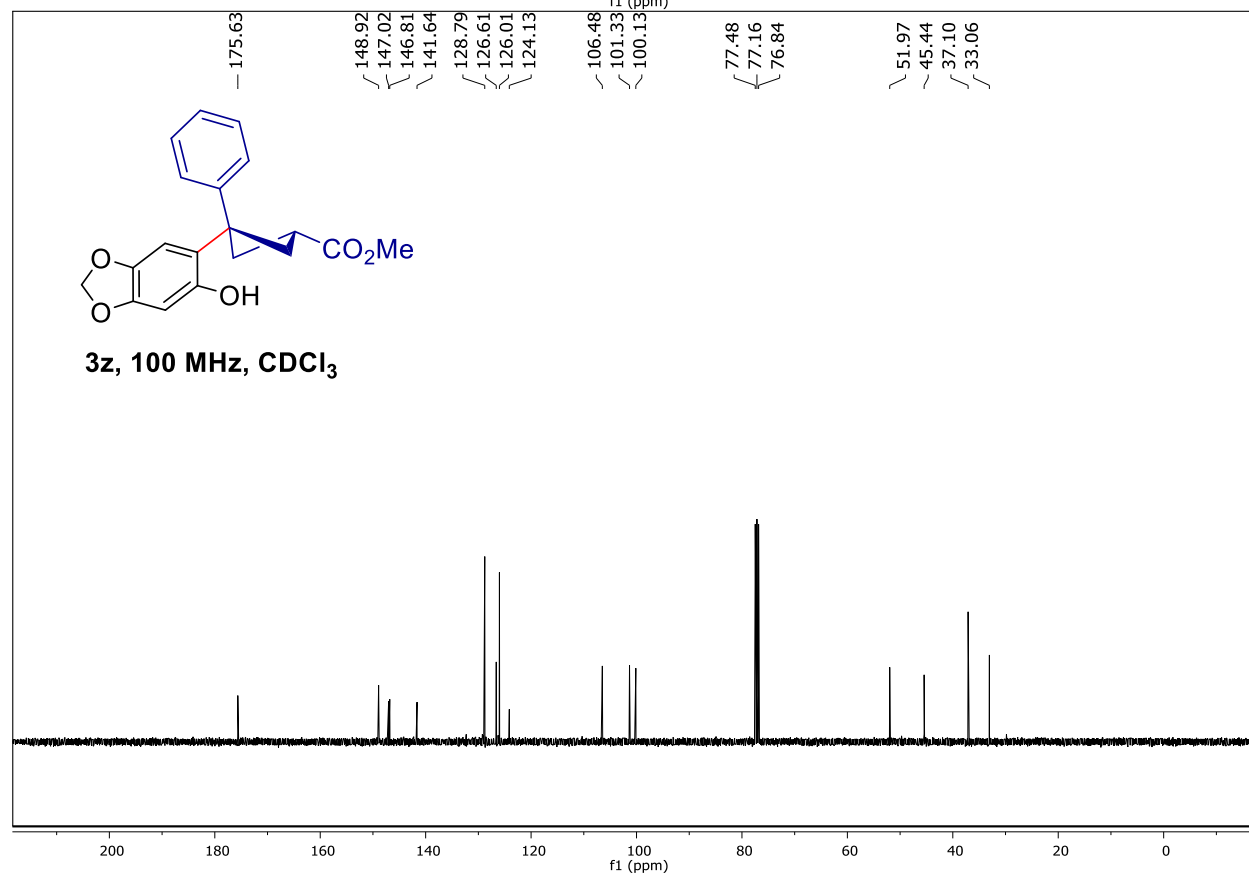

**Methyl-3-(1-((4-methylphenyl)sulfonamido)naphthalen-2-yl)-3-phenylcyclobutane-1-carboxylate (3aa)**

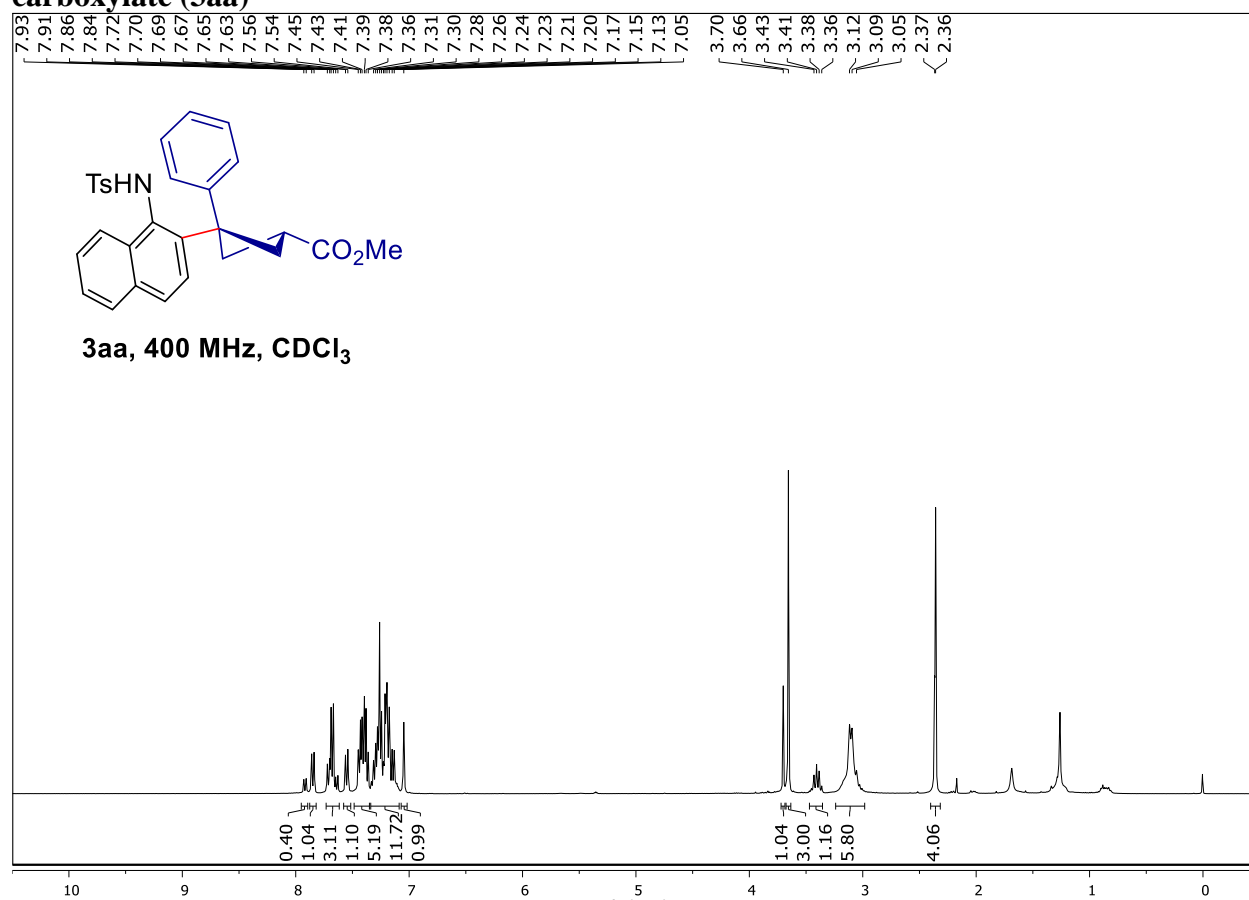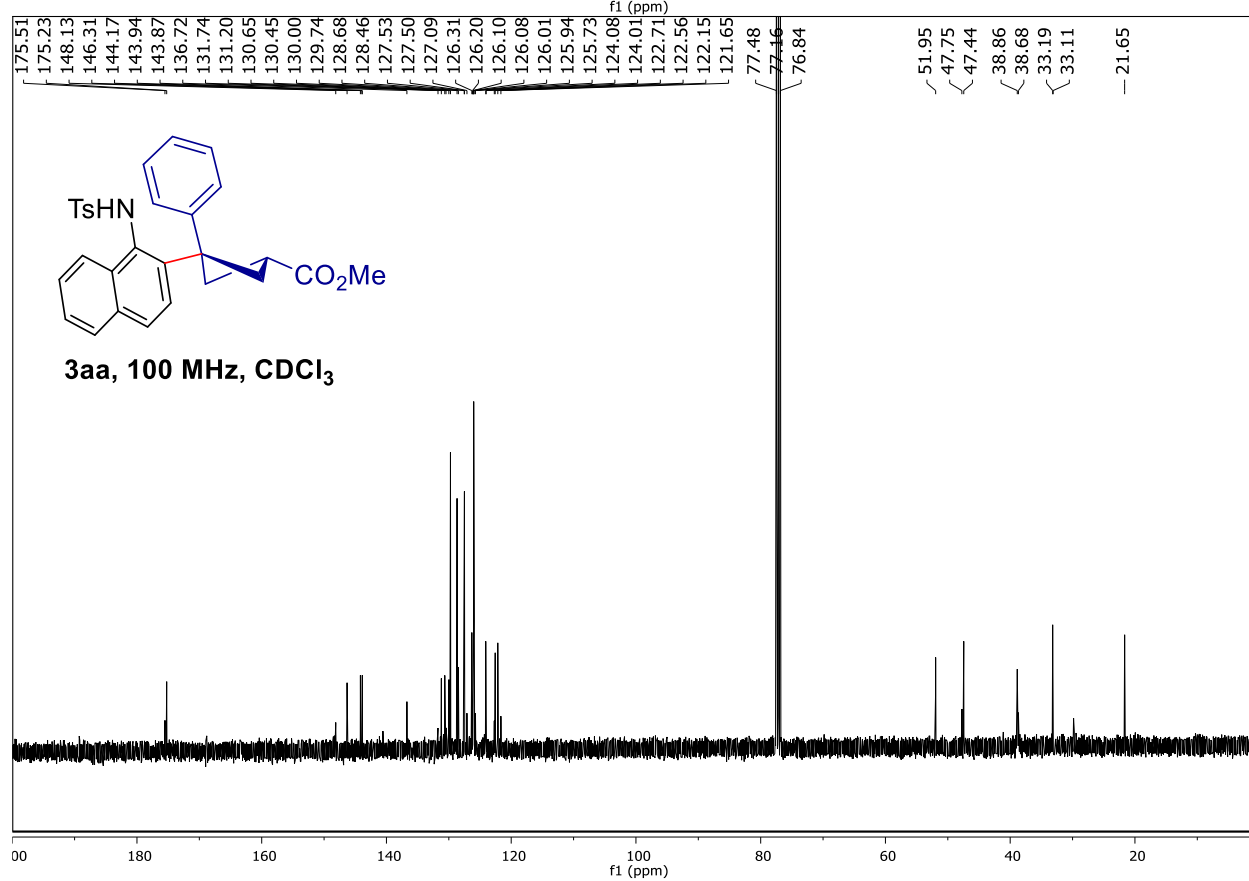

### 3-(2-Hydroxynaphthalen-1-yl)cyclobutyl(phenyl)methanone (3ab)

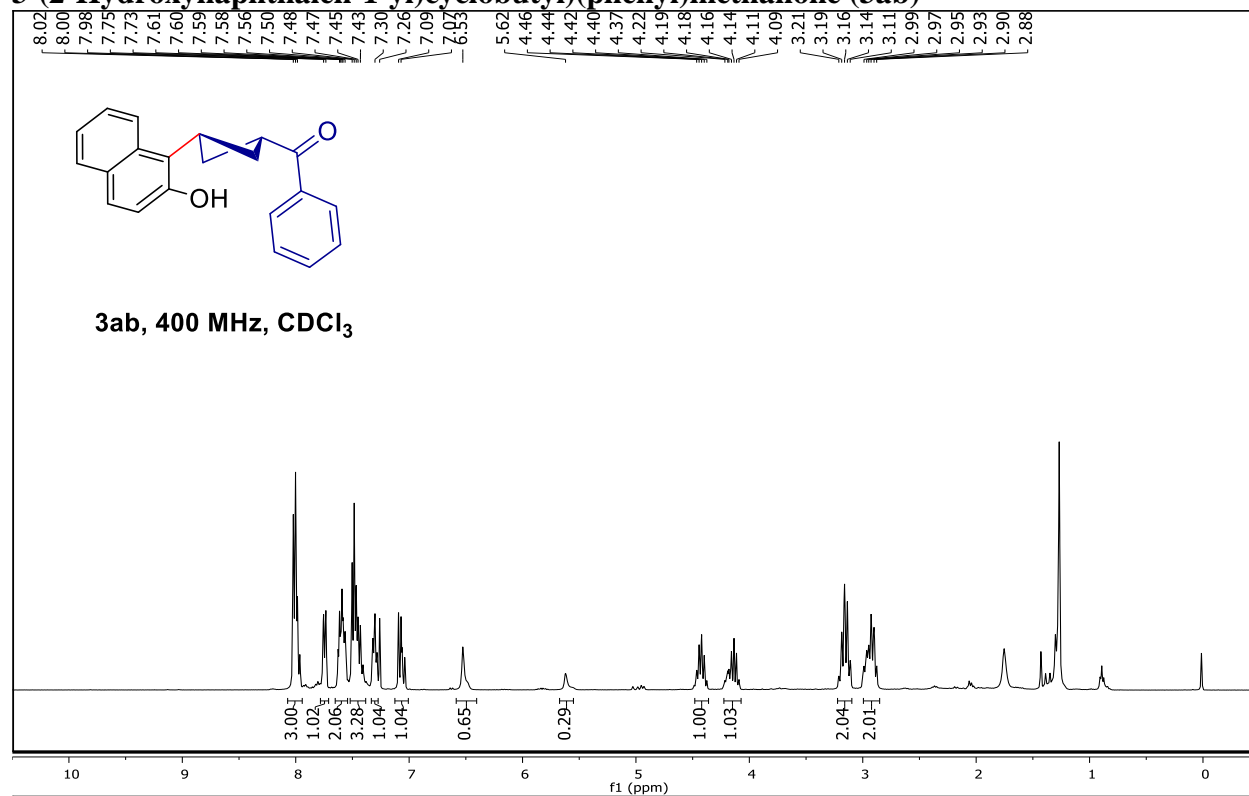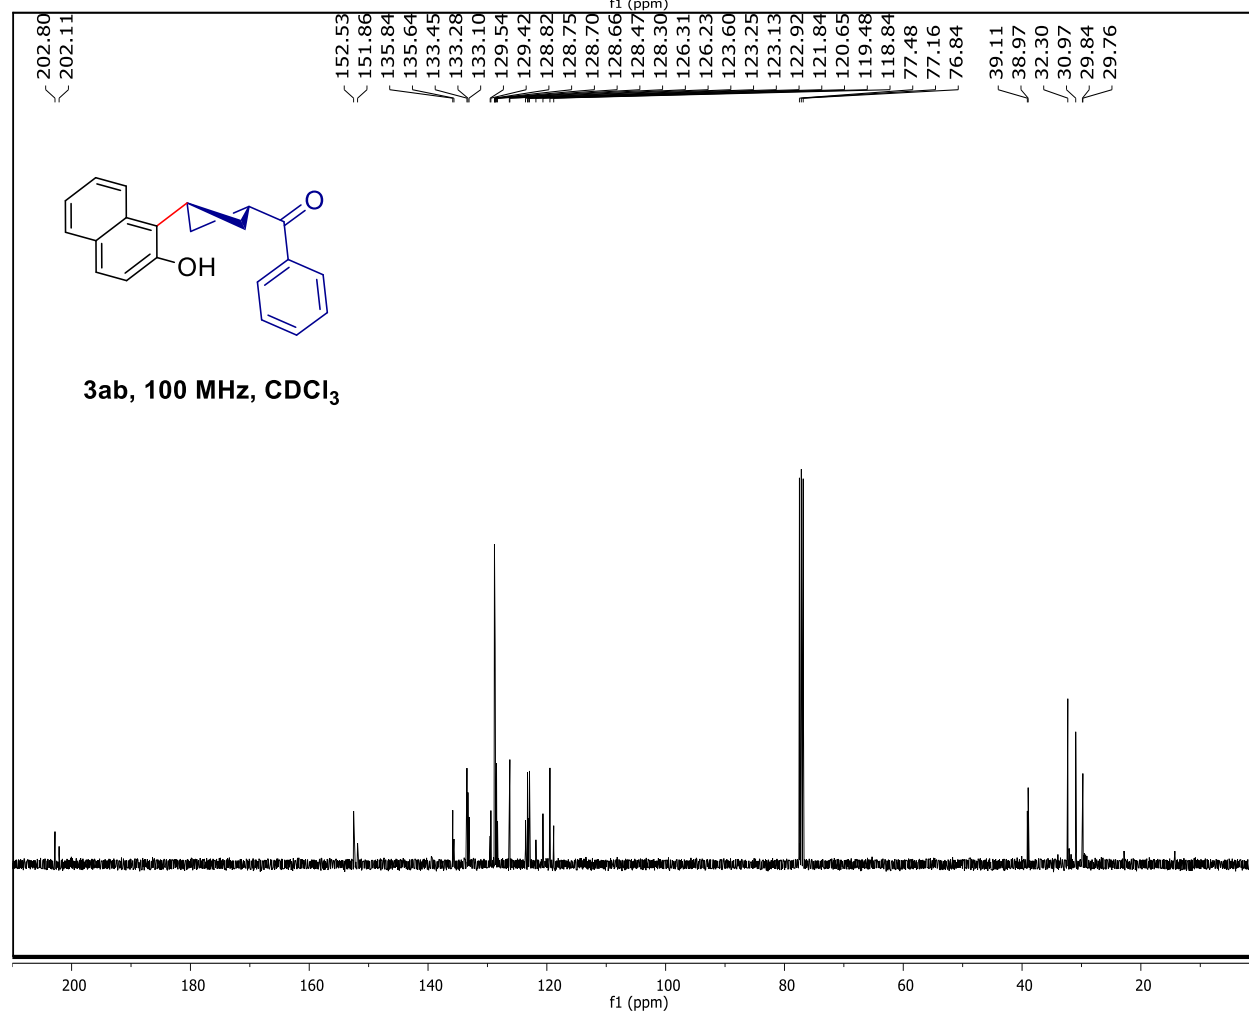

### 3-(2-Hydroxynaphthalen-1-yl)cyclobutyl(naphthalen-2-yl)methanone (3ac)

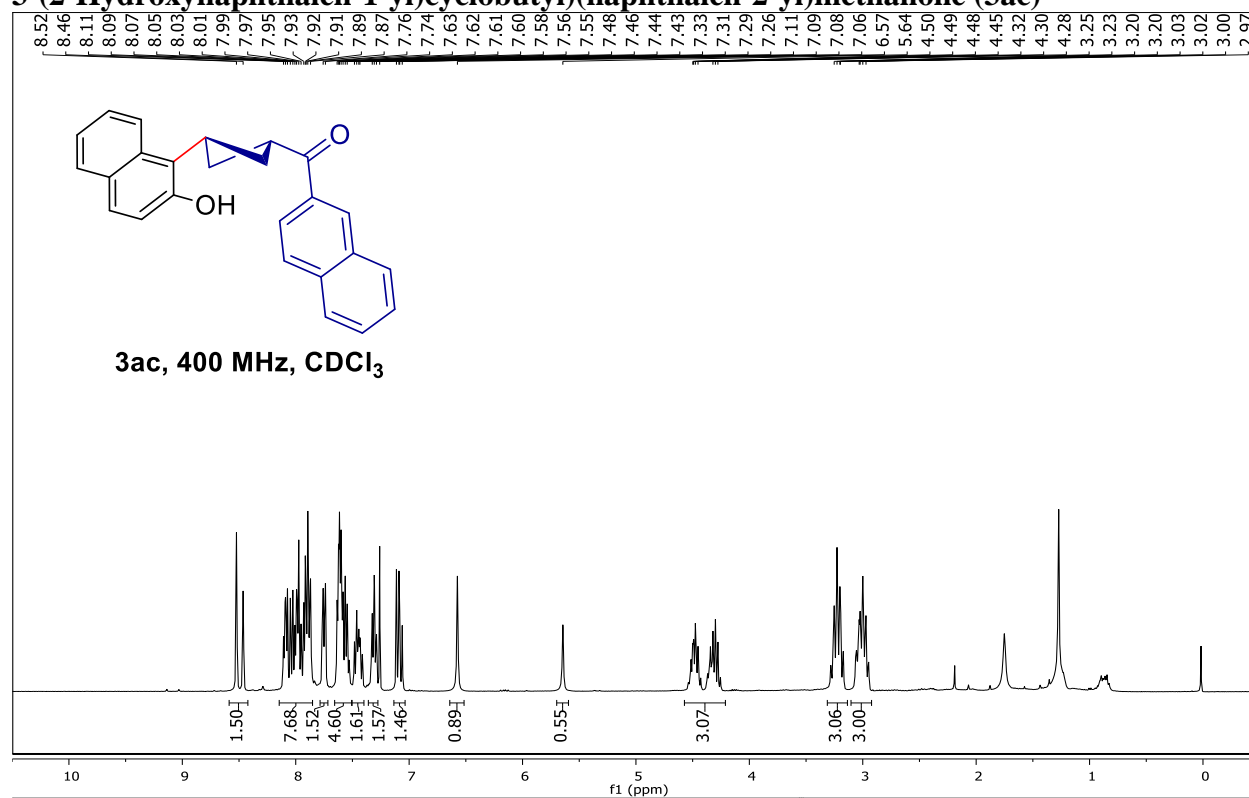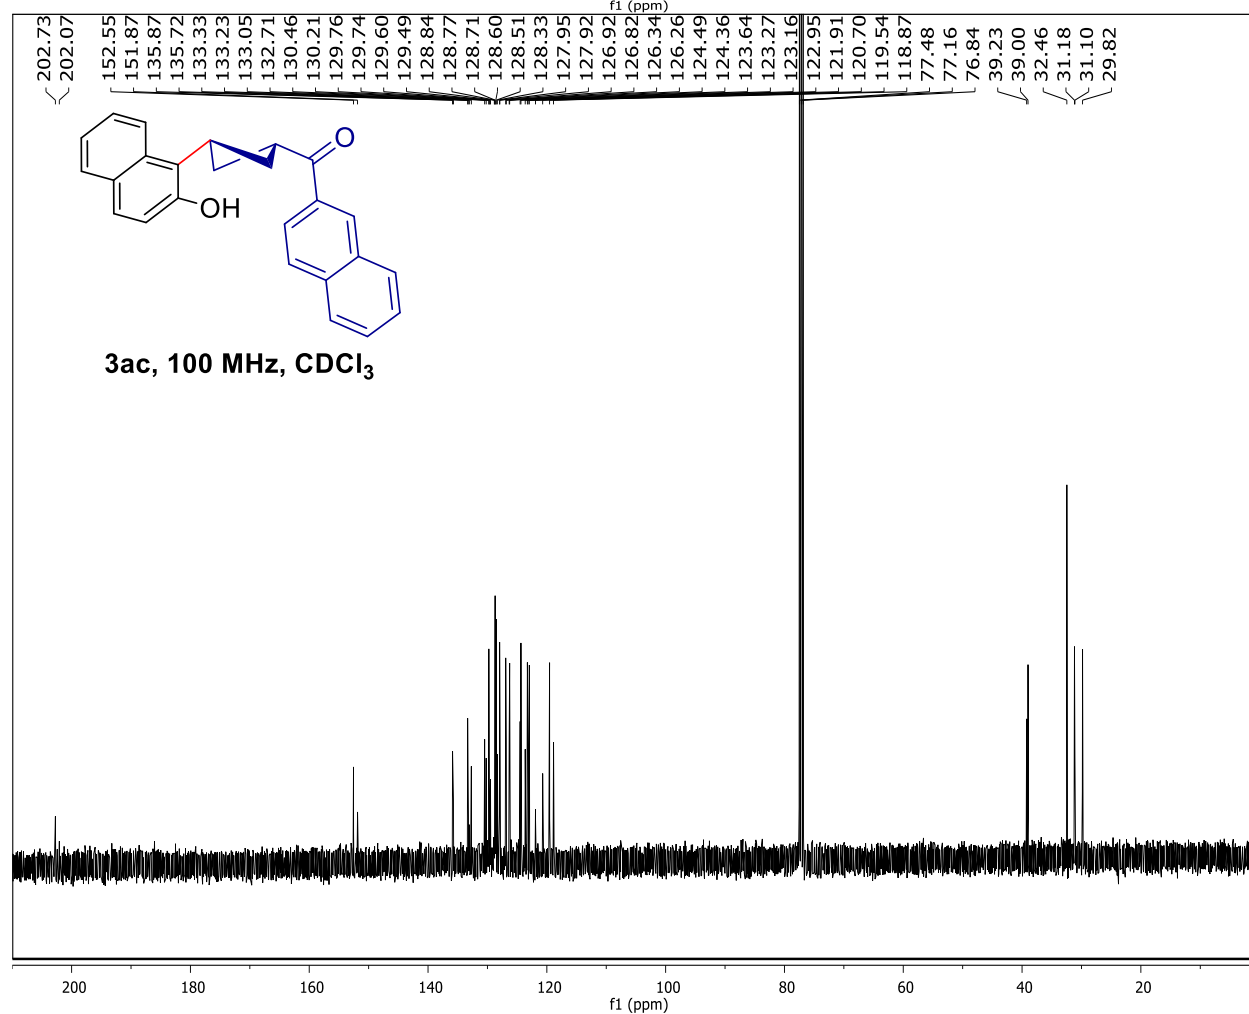

**1-(3-(Hydroxymethyl)-1-phenylcyclobutyl)naphthalen-2-ol (6)**

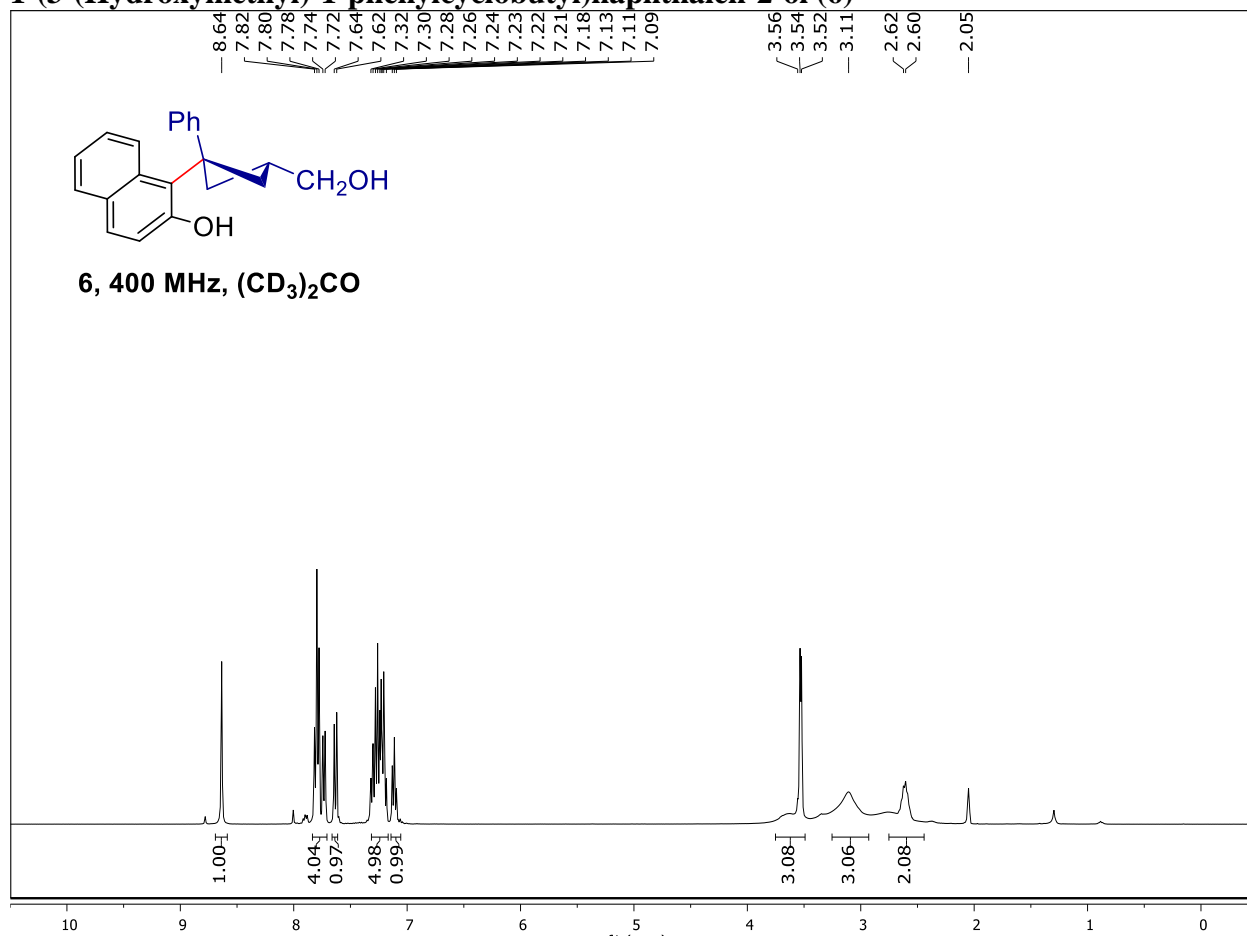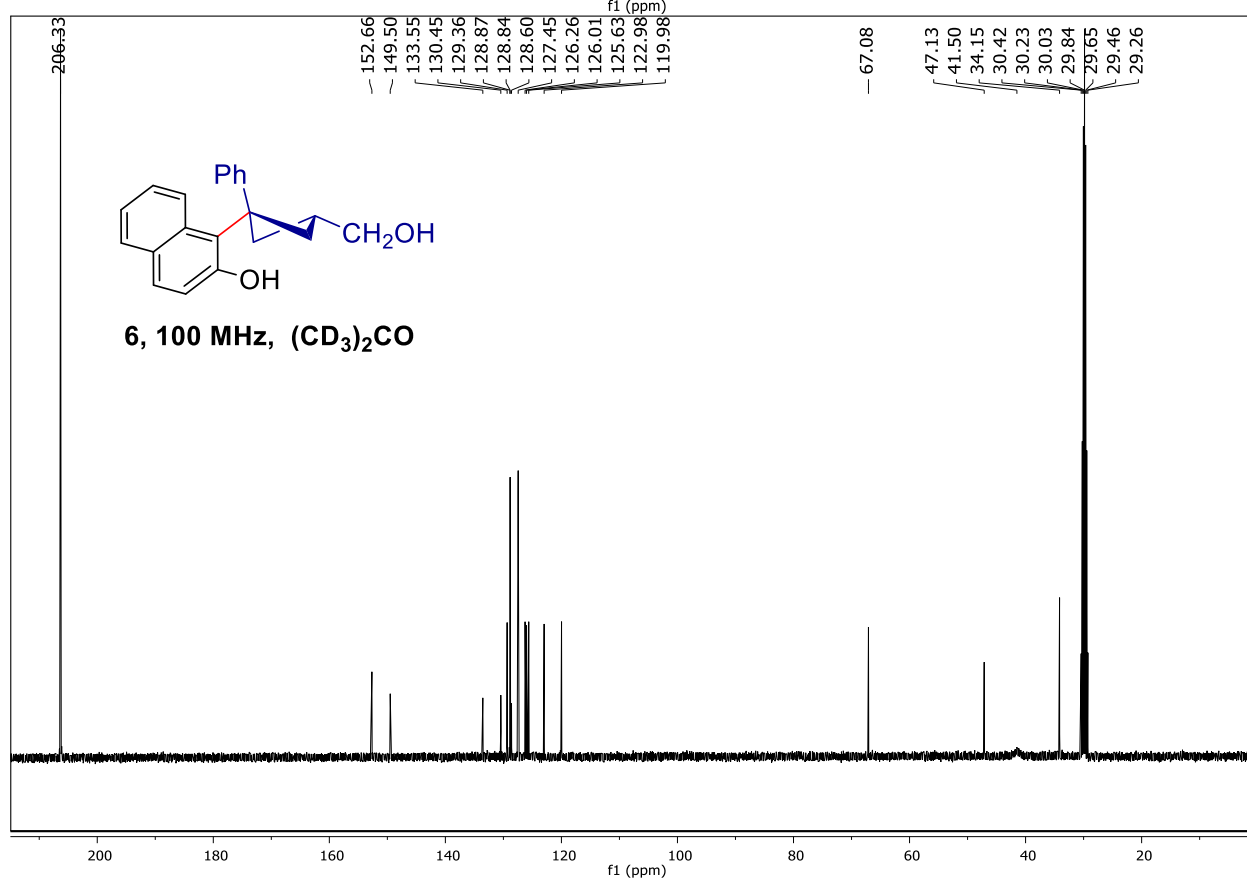

### 3-(2-Hydroxynaphthalen-1-yl)-3-phenylcyclobutane-1-carboxylic acid (7)

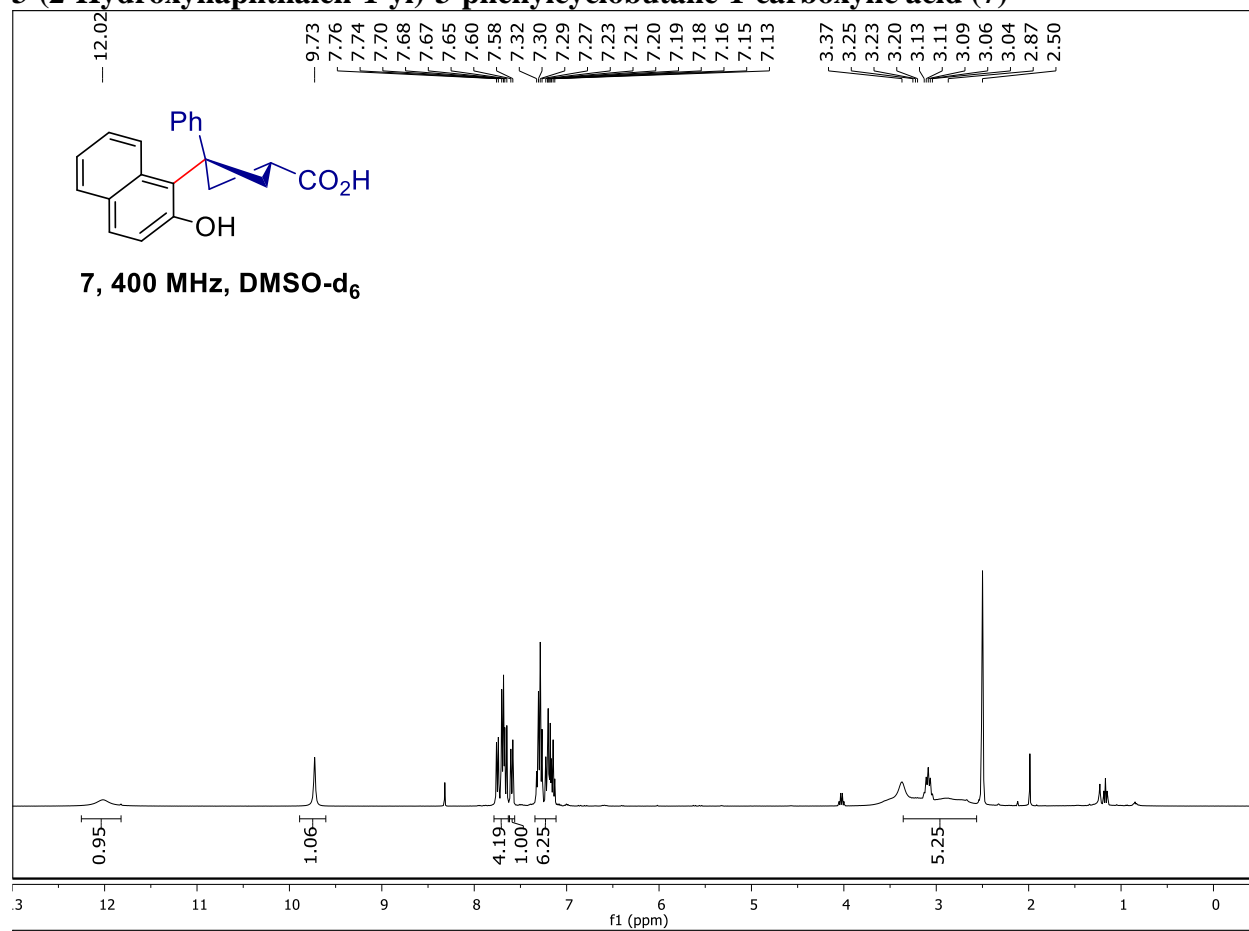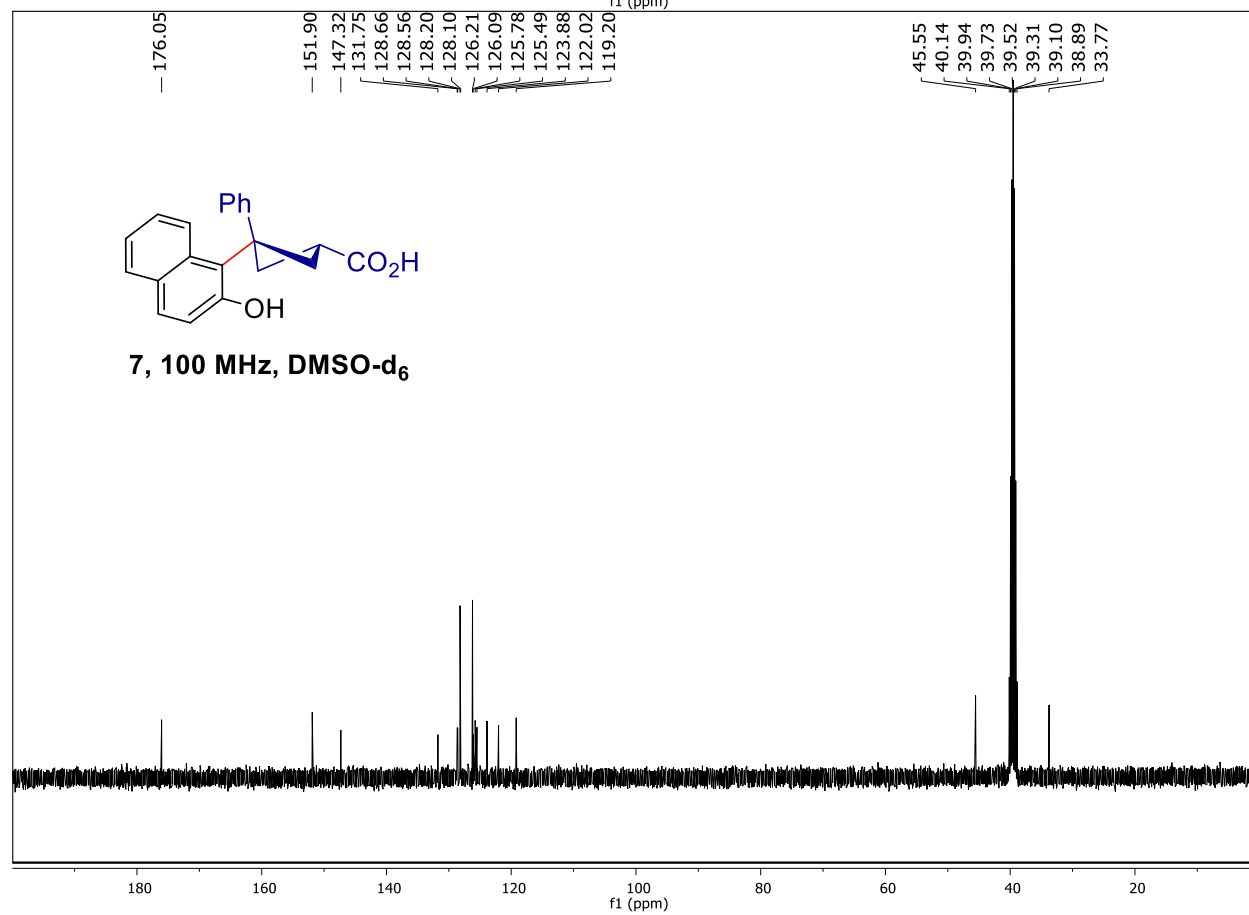

**Methyl-3-(2-methoxynaphthalen-1-yl)-3-phenylcyclobutane-1-carboxylate (8)**

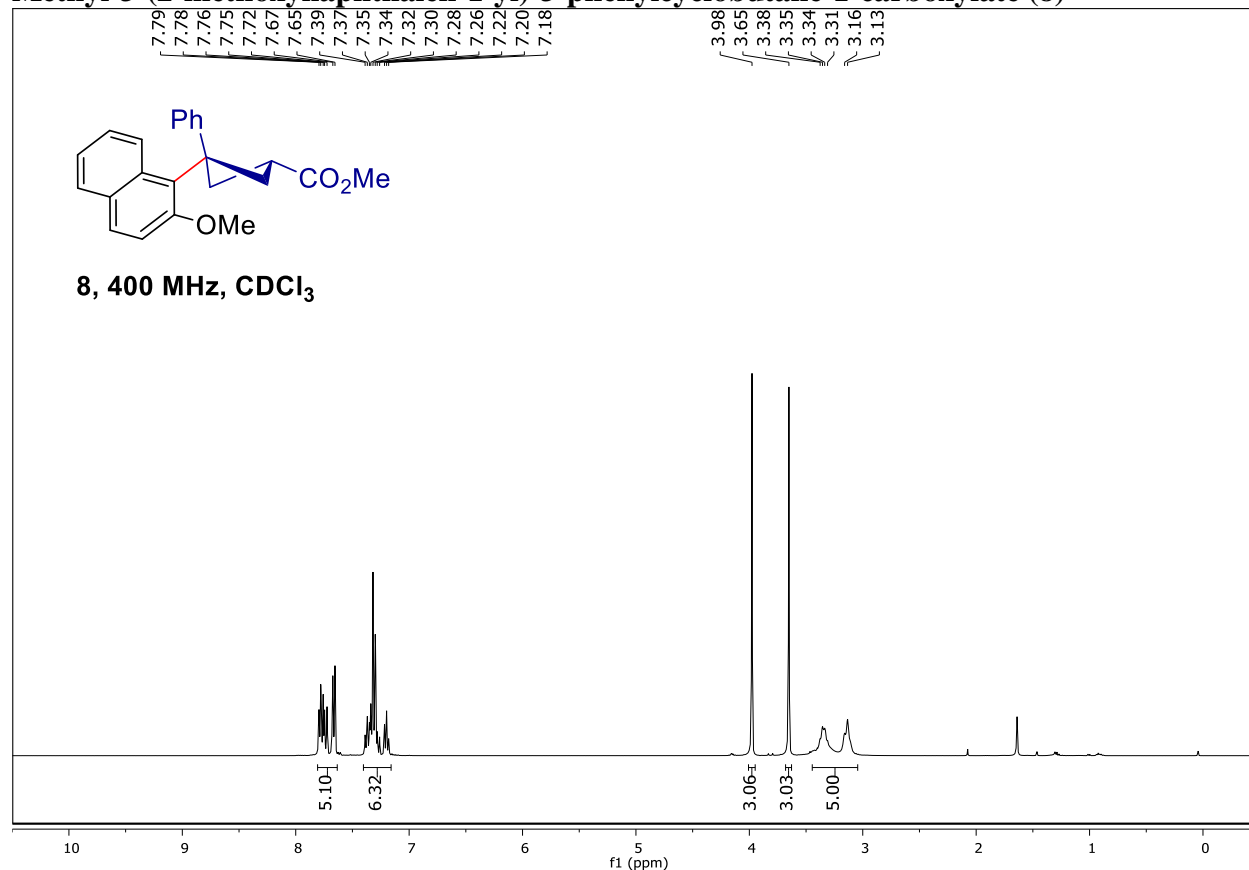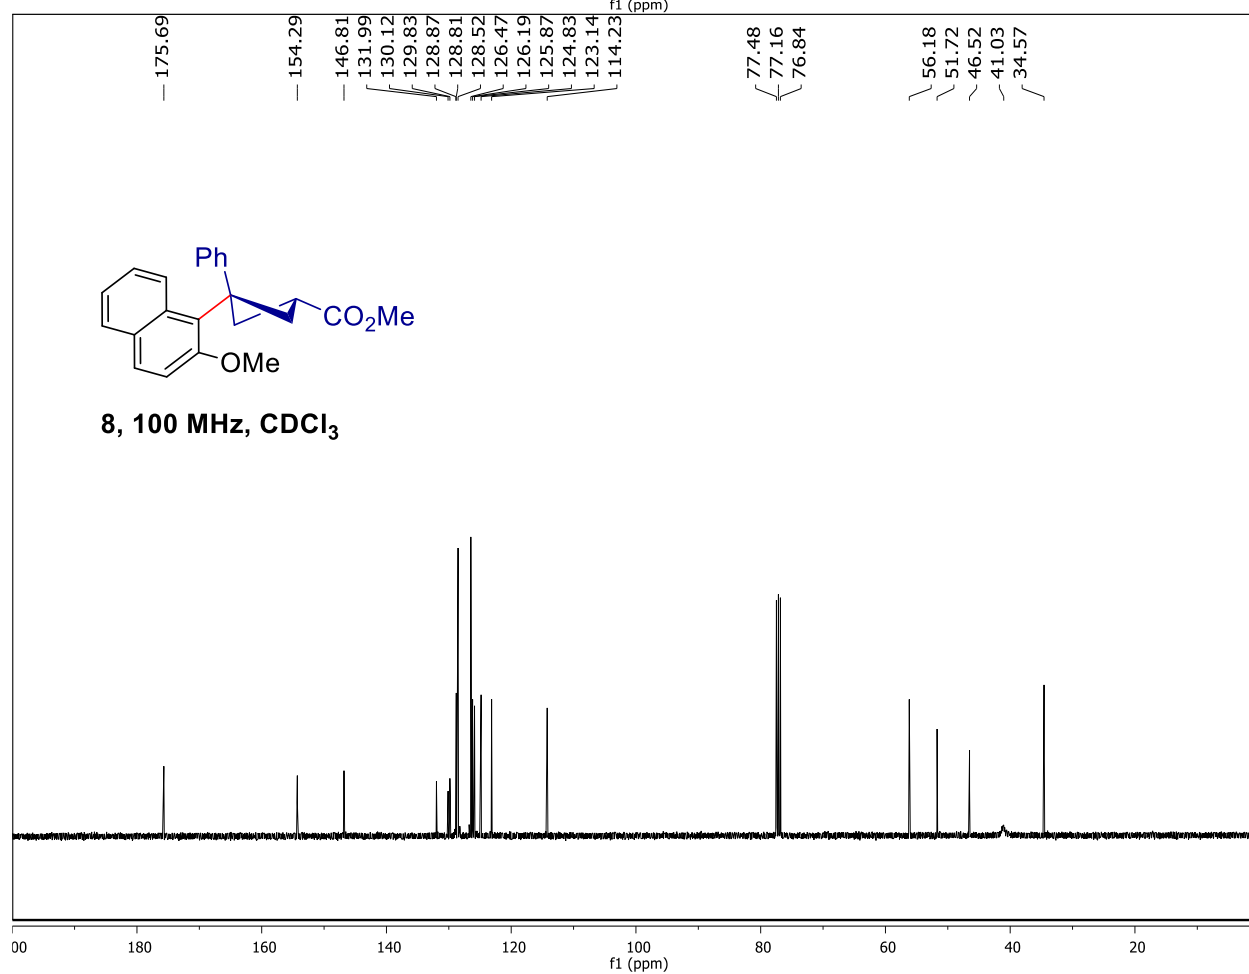

**Methyl-3-(2-phenoxy-naphthalen-1-yl)-3-phenylcyclobutane-1-carboxylate (10)**

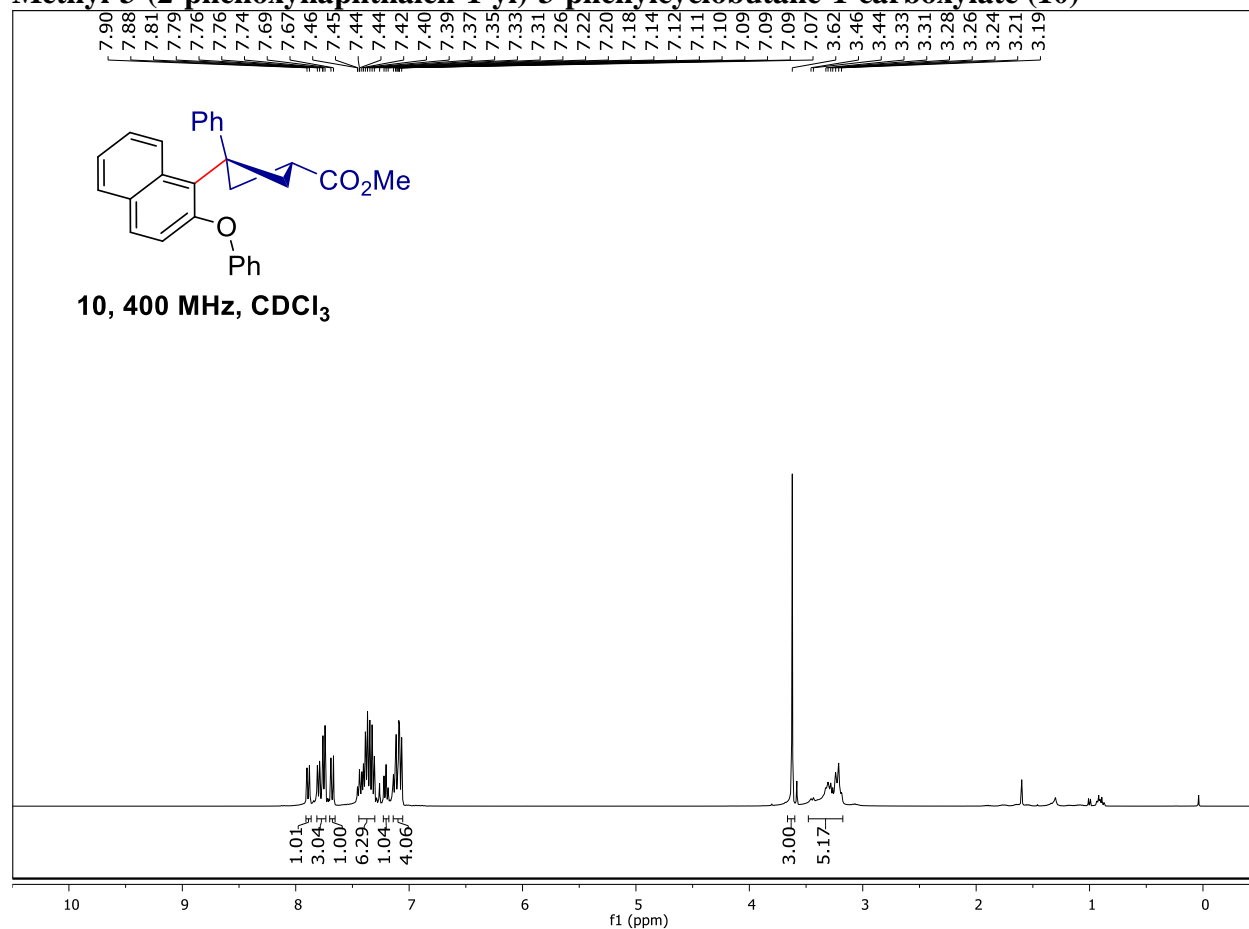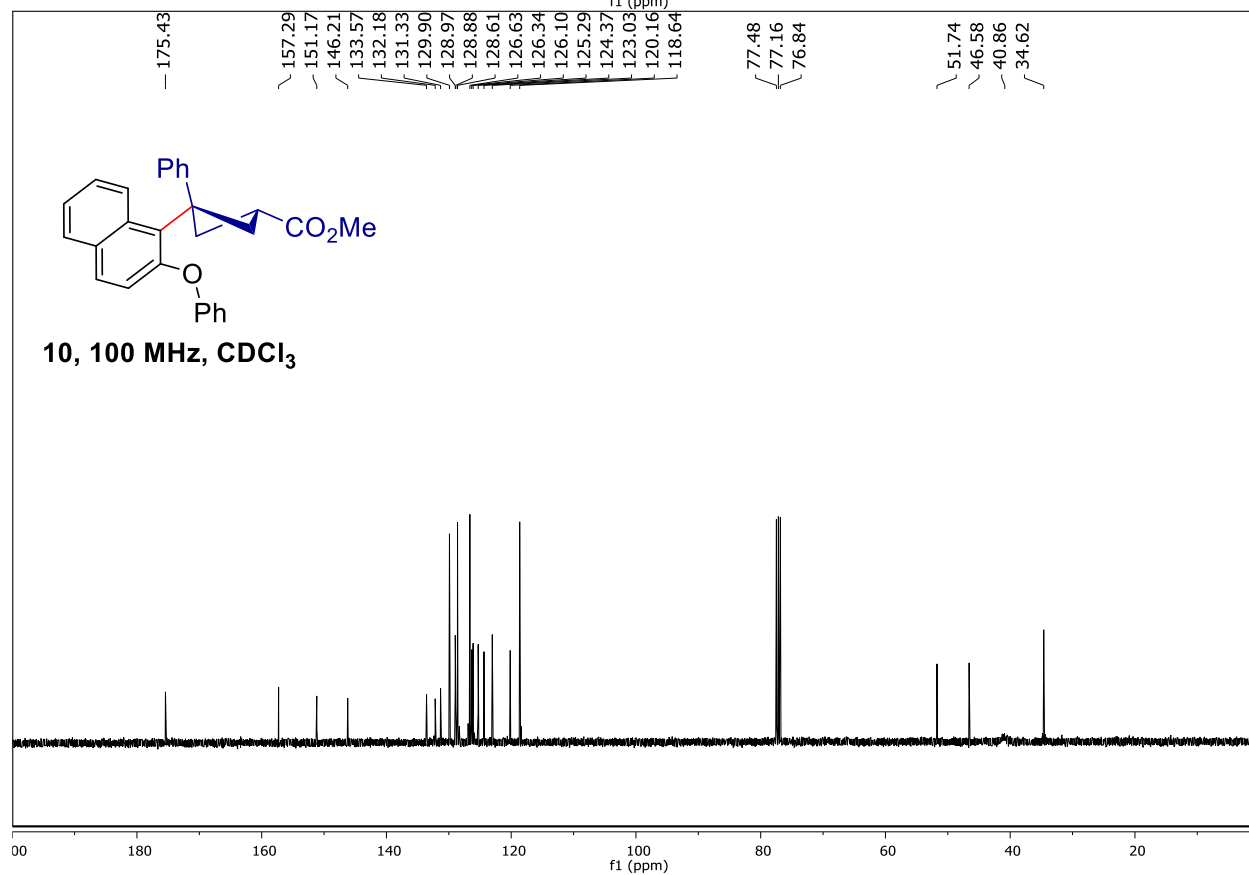

**Methyl-3-phenyl-3-(2-(((trifluoromethyl)sulfonyl)oxy)naphthalen-1-yl)cyclobutane-1-carboxylate (11)**

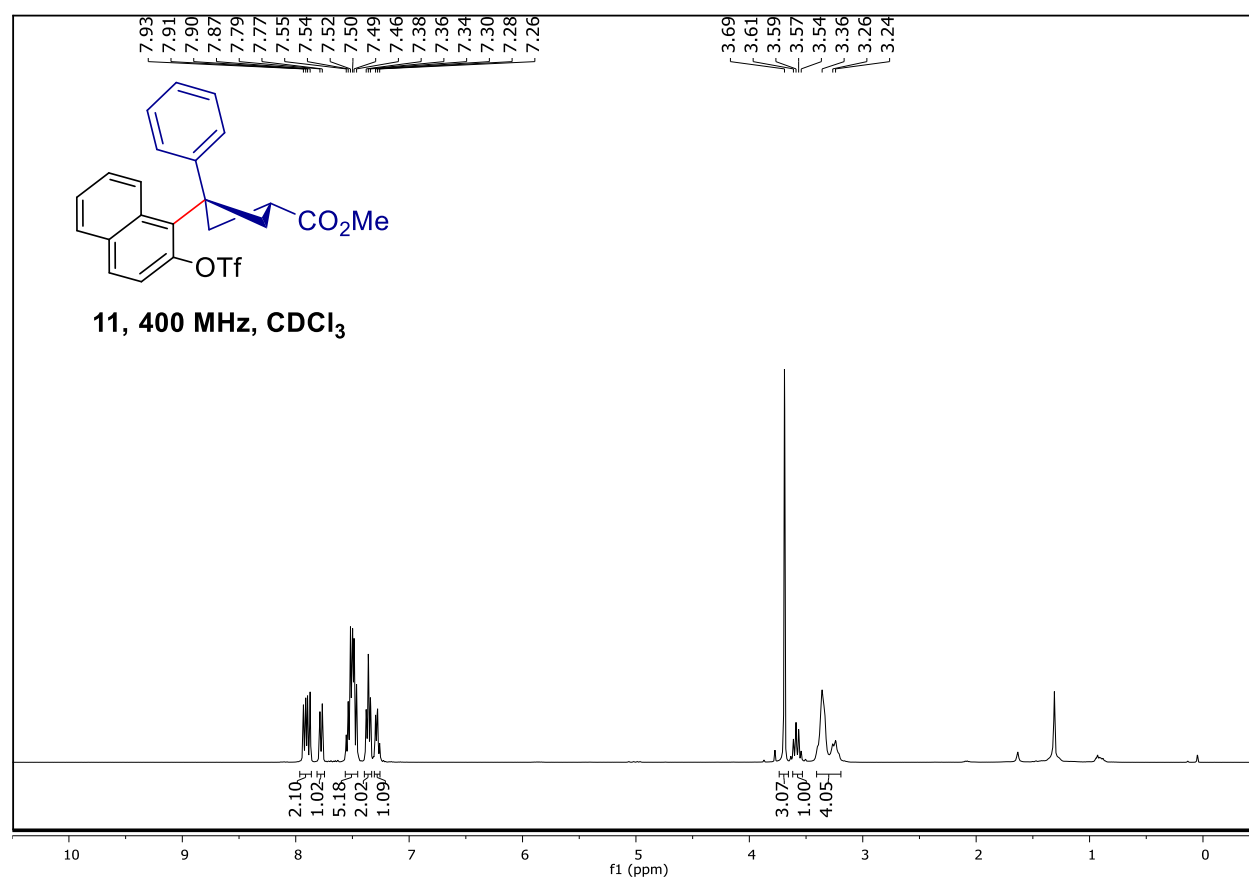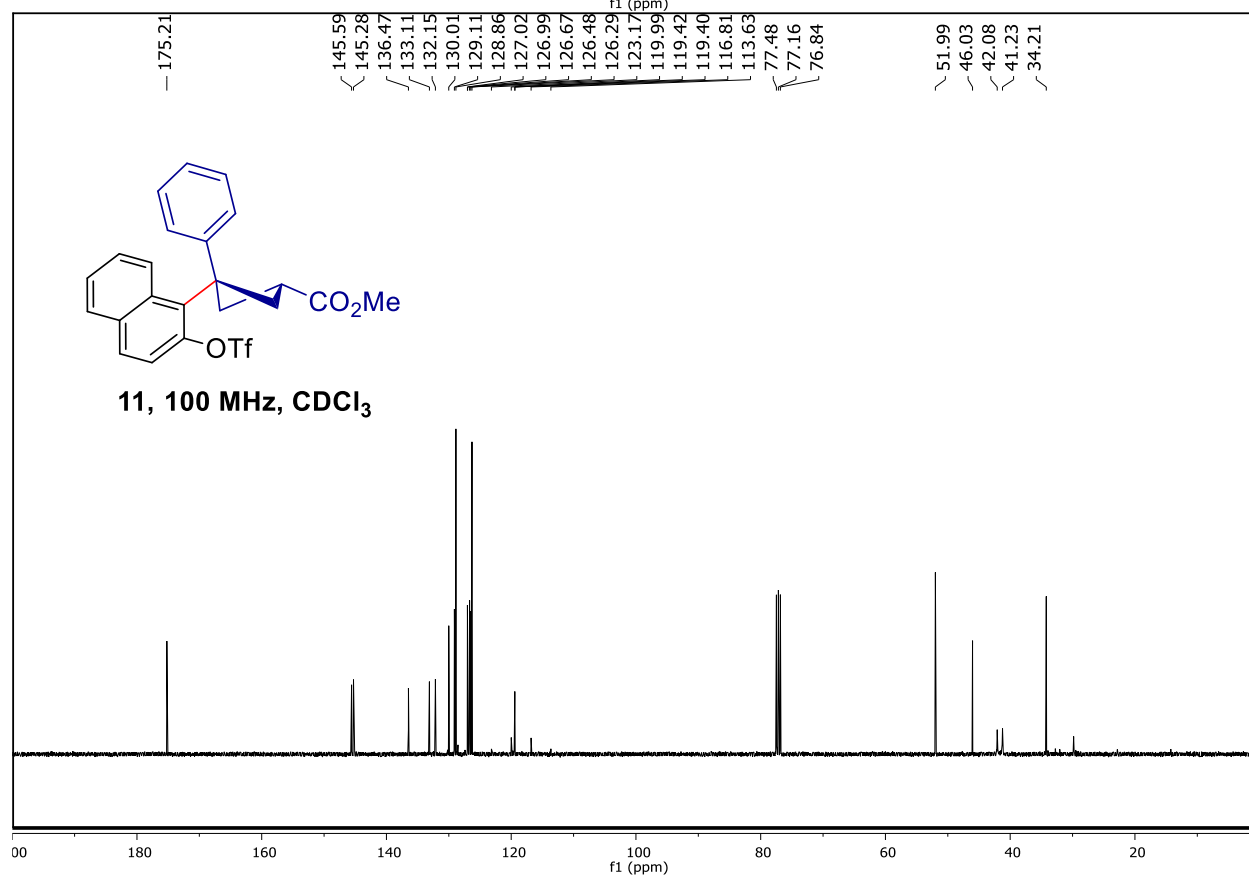

**Methyl-3-(2-(diphenylphosphoryl)naphthalen-1-yl)-3-phenylcyclobutane-1-carboxylate  
(12)**

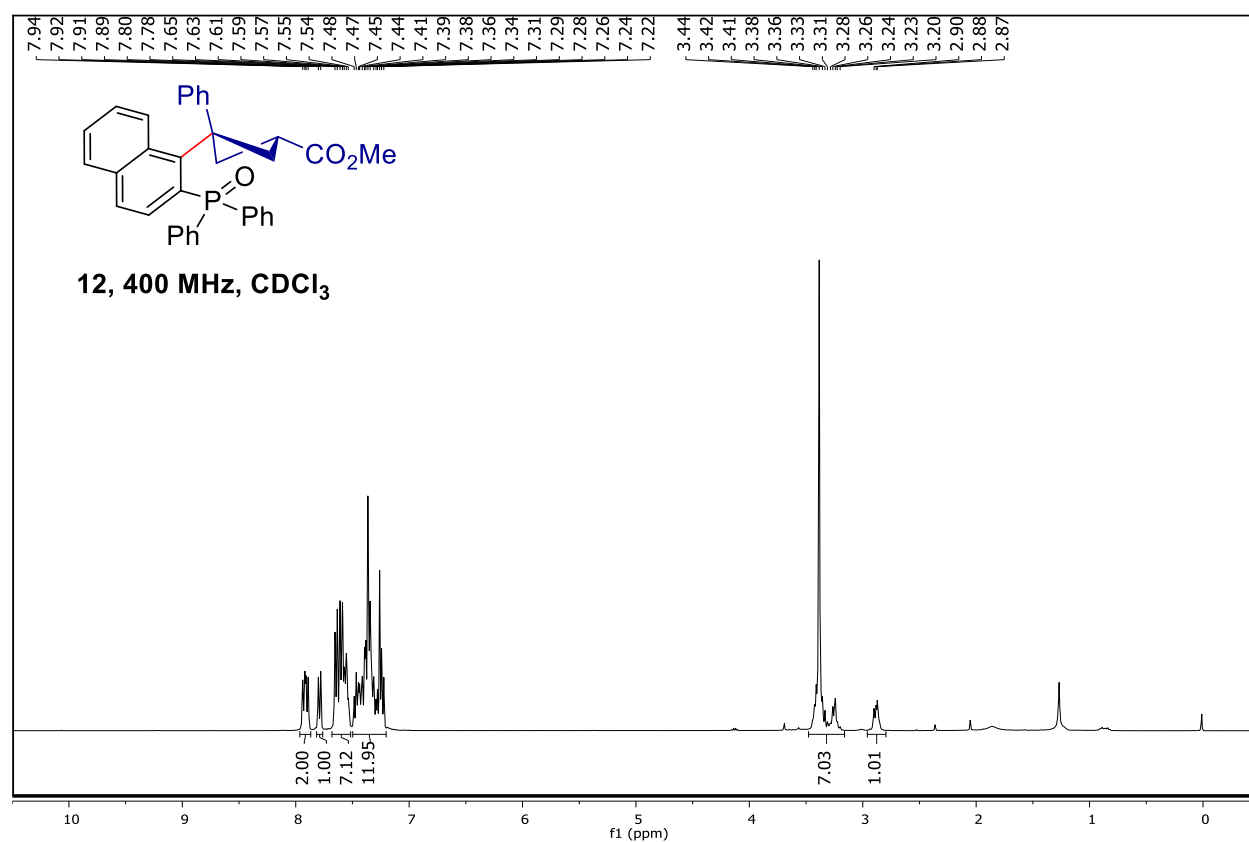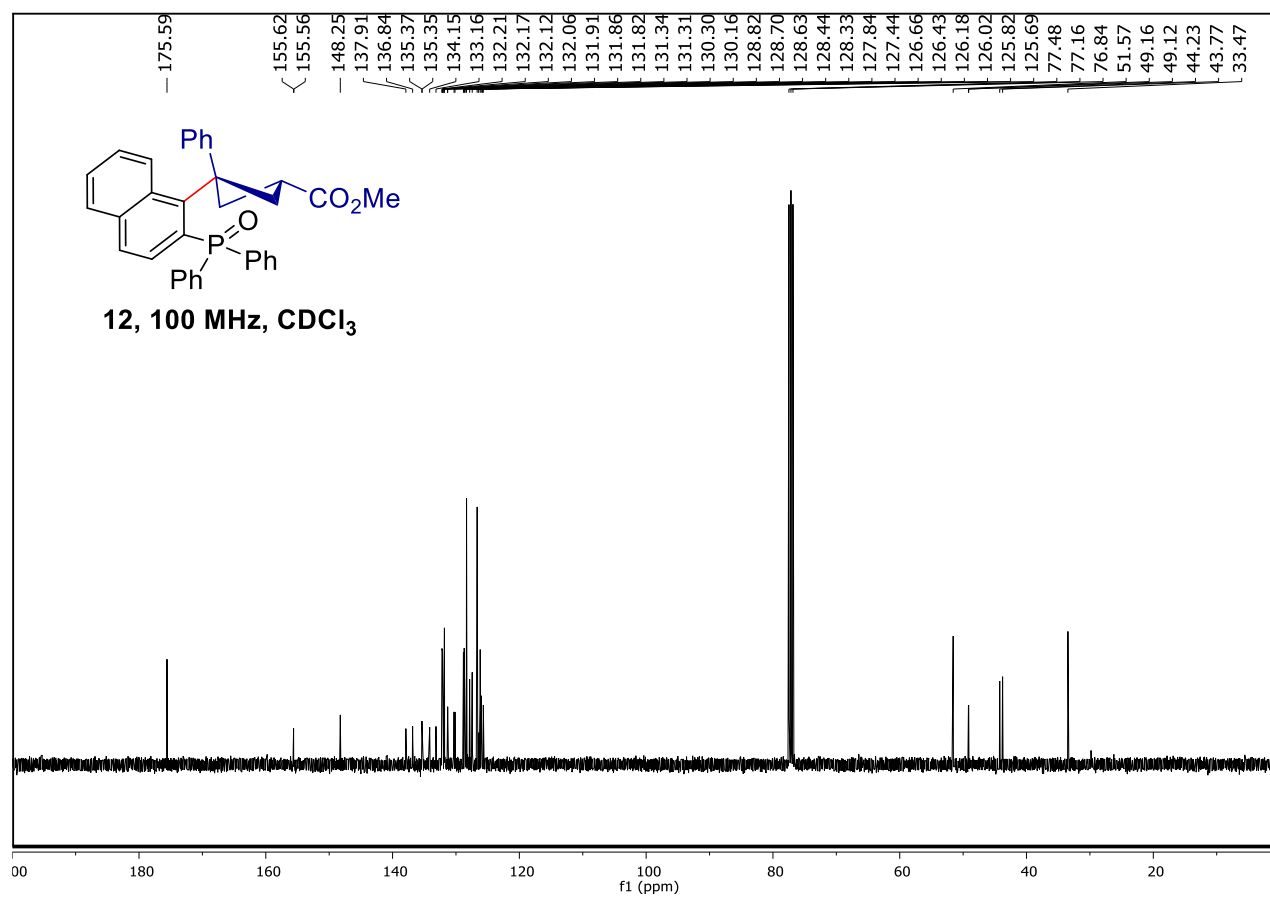

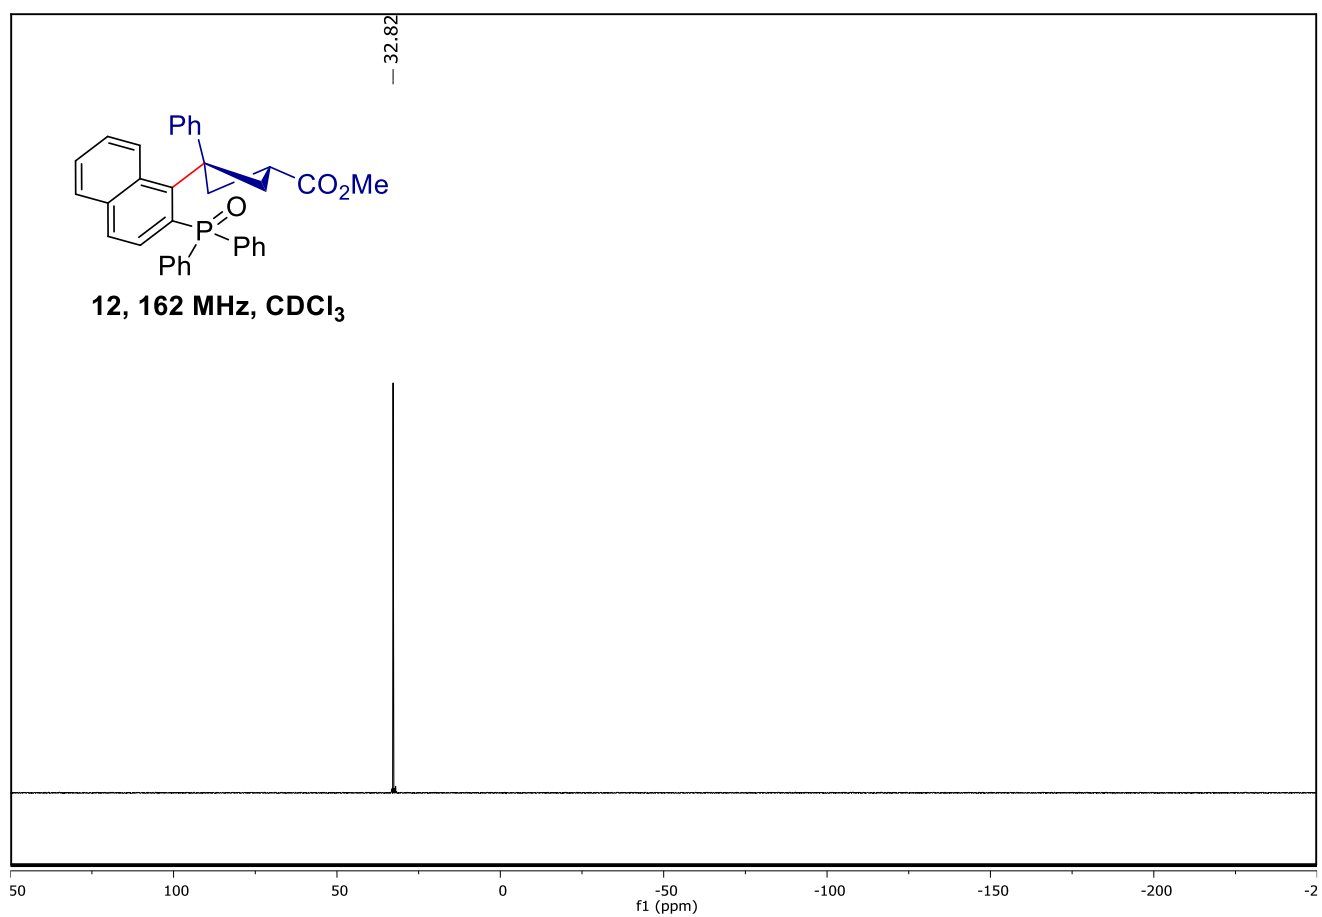

**Methyl-1-allyl-3-(2-methoxynaphthalen-1-yl)-3-phenylcyclobutane-1-carboxylate (13)**

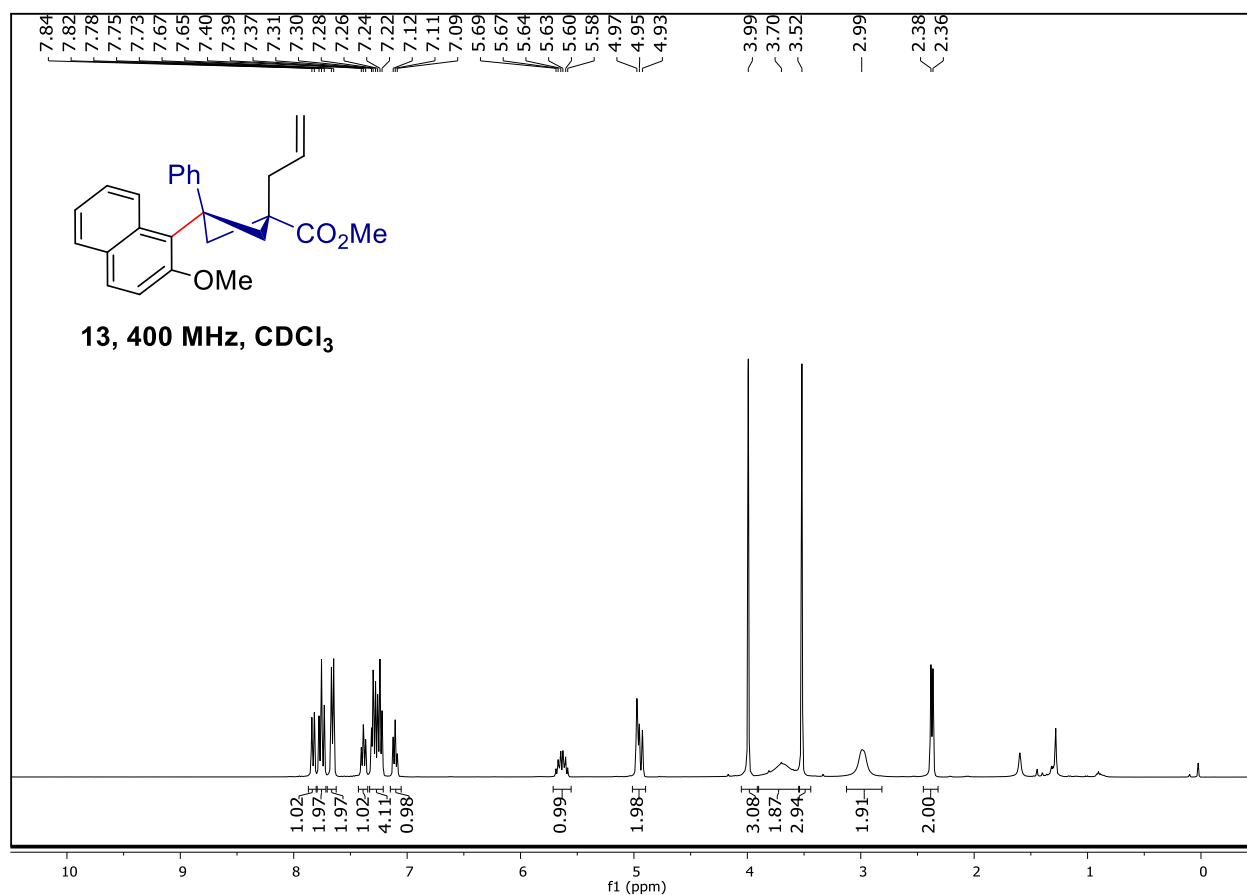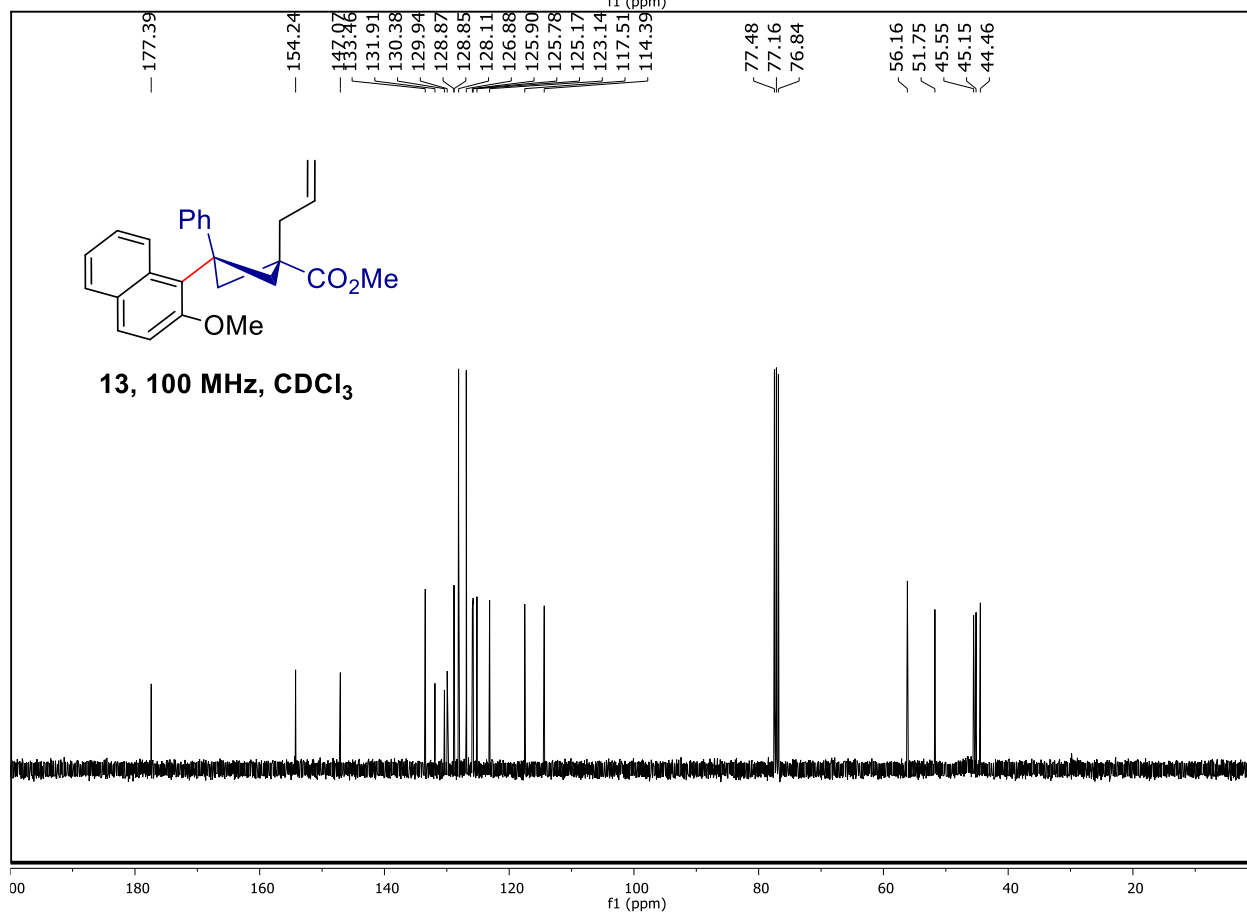

**3-(2-Methoxynaphthalen-1-yl)-*N*,3-diphenylcyclobutane-1-carboxamide (14)**

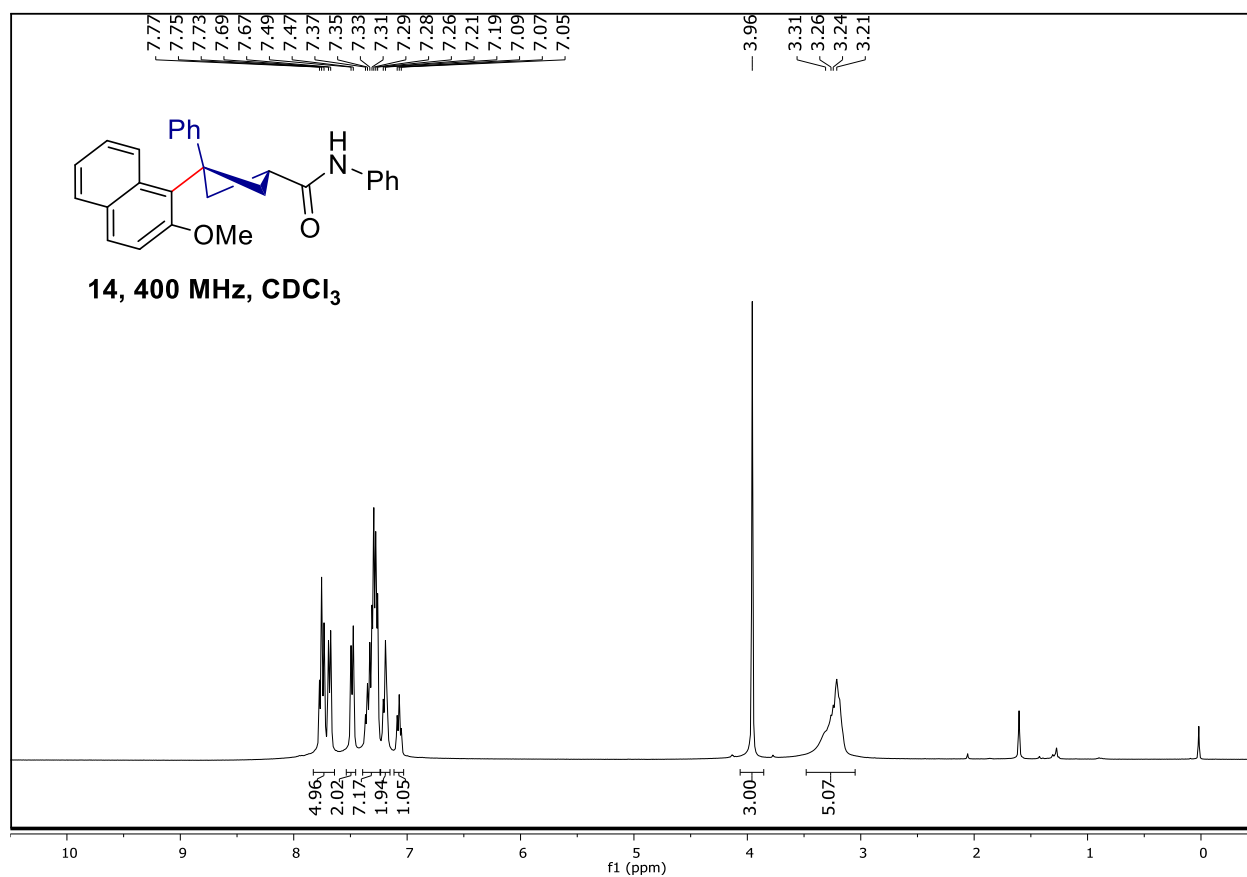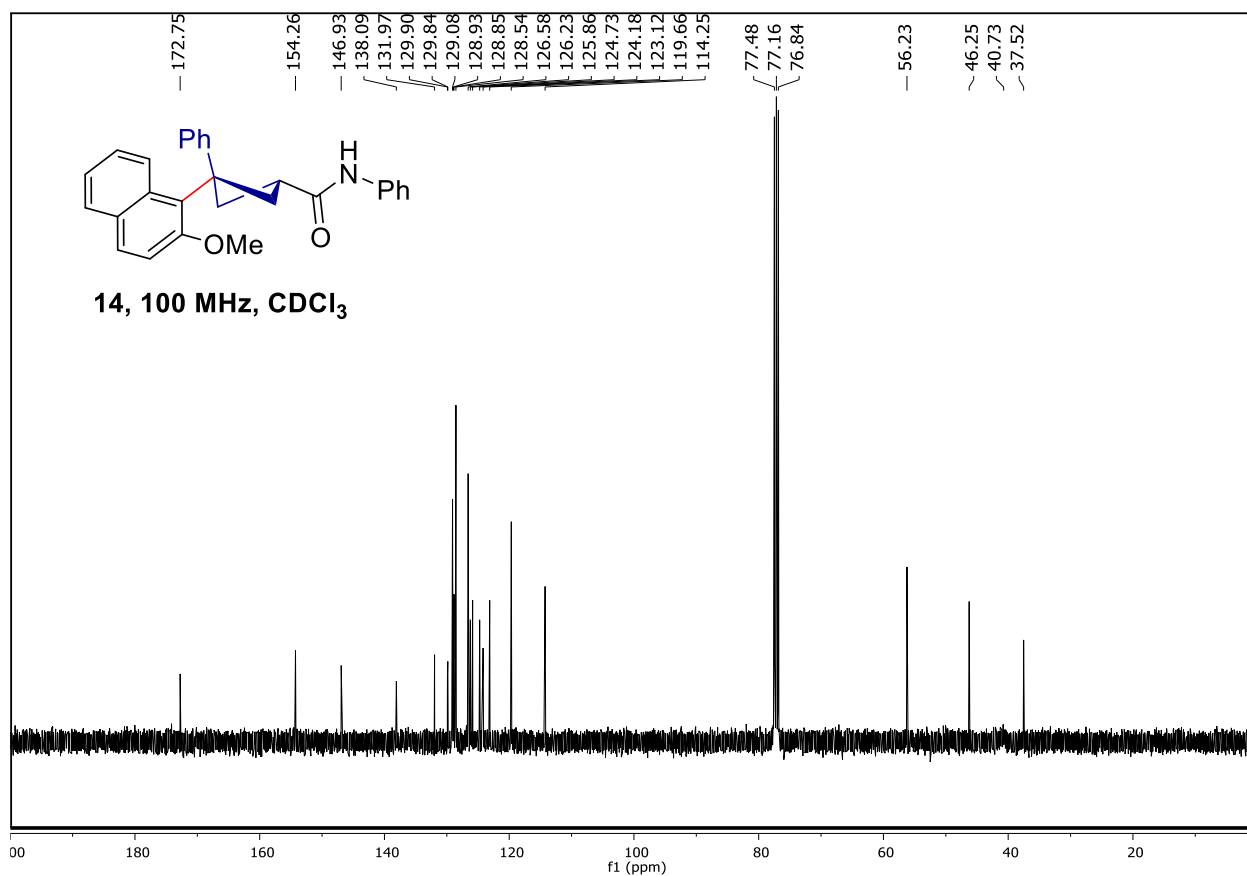

**3-(2-Methoxynaphthalen-1-yl)-N,3-diphenylcyclobutane-1-carbothioamide (15)**

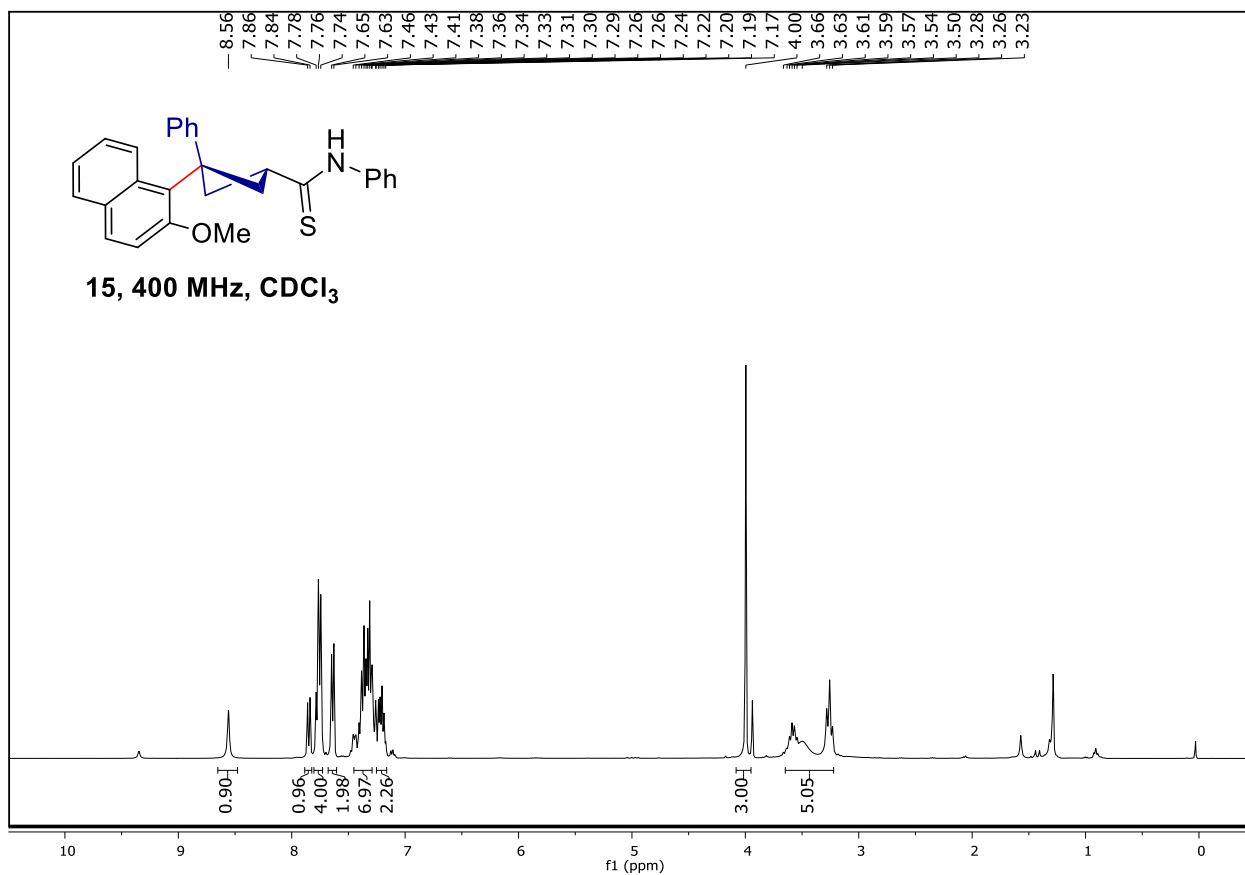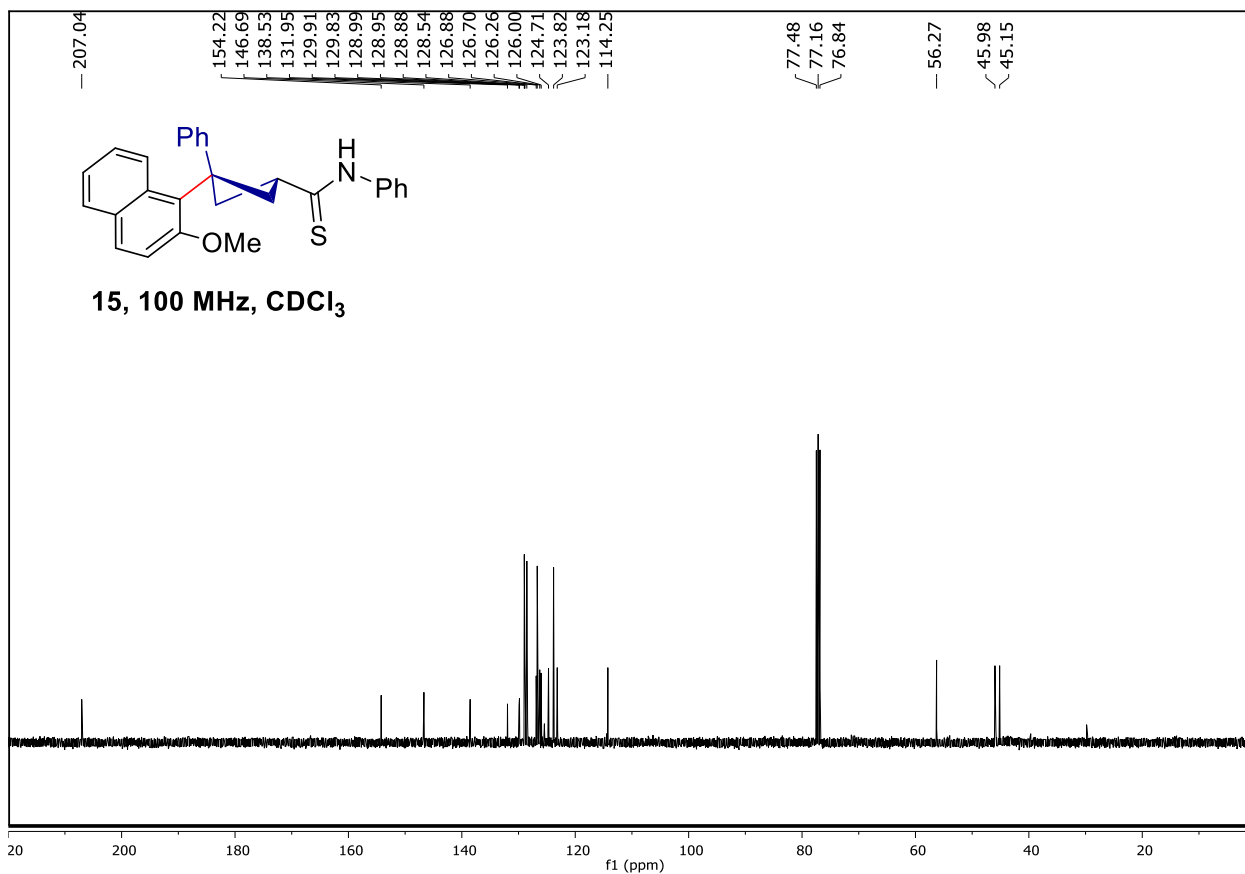

Supplement: SC-014-D3SC01373A-s001.pdf [file SC-014-D3SC01373A-s001.pdf]
